# Supplementary material for: Identification of prognostic immune-related genes in the tumor microenvironment of endometrial cancer
Source: Aging (Albany NY). 2020 Feb 19;12(4):3371–87. doi: 10.18632/aging.102817 (PMC7066904; doi:10.18632/aging.102817)
Supplement: Supplementary Figures [file aging-12-102817-s006..pdf]

## SUPPLEMENTARY FIGURES

### Supplementary Figures

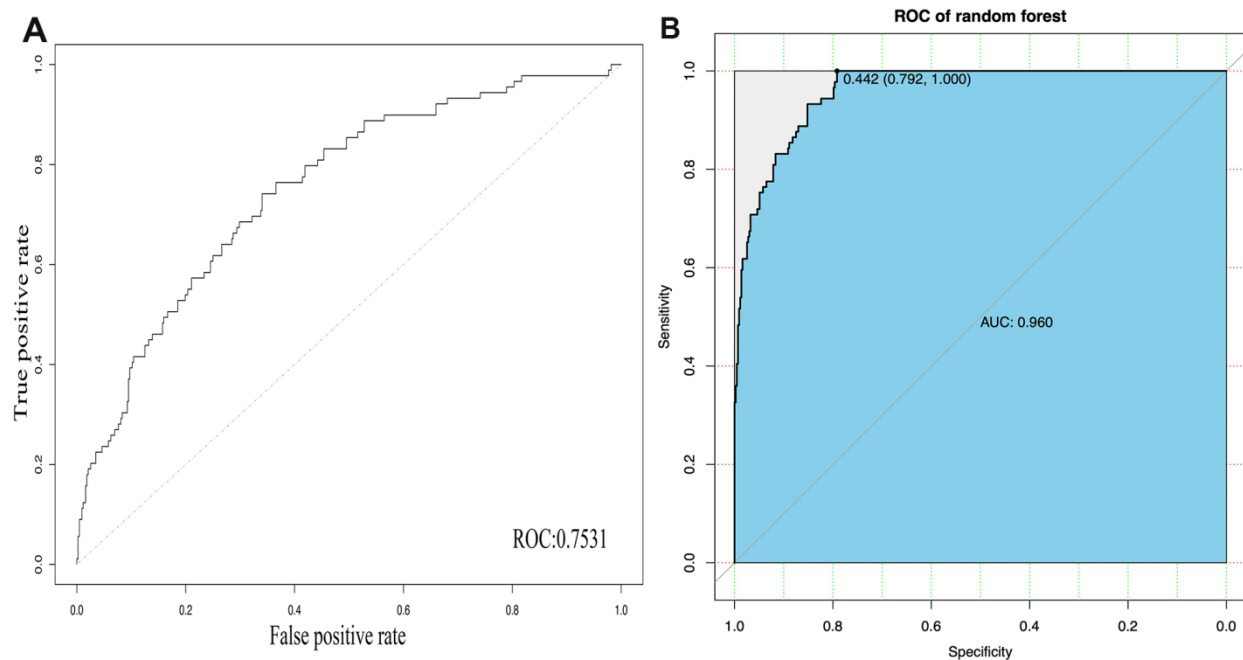

**Supplementary Figure 1.** ROC (receiver operating characteristic) curve of LASSO algorithm (A) and Random forest algorithm (B).

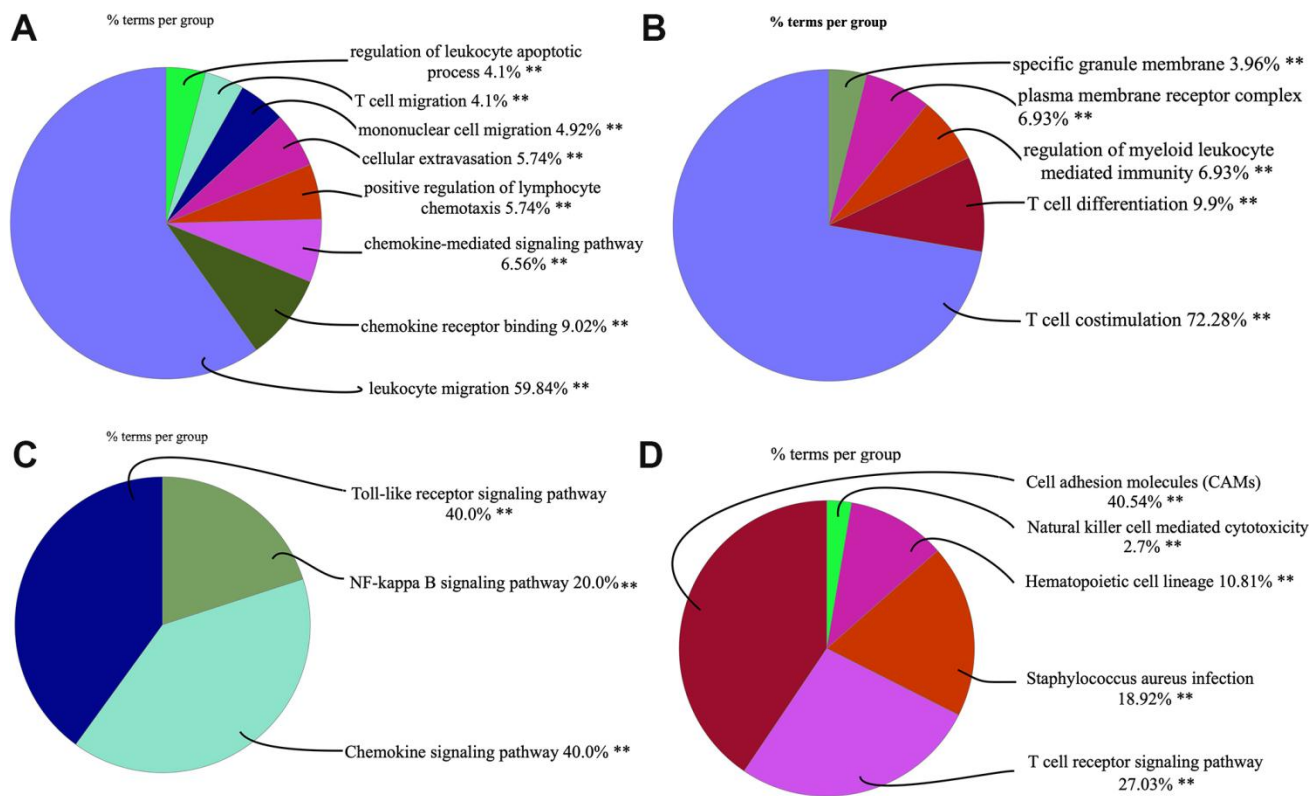

**Supplementary Figure 2. Functional enrichment of key modules of PPI network.** GO analysis (A) and KEGG (C) analysis of module 1. GO analysis (B) and KEGG (D) analysis of module 2
