# Supplementary material for: Identification of prognostic immune-related genes in the tumor microenvironment of endometrial cancer
Source: Aging (Albany NY). 2020 Feb 19;12(4):3371–87. doi: 10.18632/aging.102817 (PMC7066904; doi:10.18632/aging.102817)
Supplement: Supplementary Table 1 [file aging-12-102817-s002..xlsx]

## Sheet: Supplement table 1
Supplementary Table 1. The immune scores and stromal scores of EC.
ID	StromalScore	ImmuneScore	ESTIMATEScore
TCGA-BK-A0C9-01A-11R-A00V-07	-605.135	776.631	171.496
TCGA-A5-A2K3-01A-11R-A32Y-07	253.818	3195.29	3449.11
TCGA-AX-A1CC-01A-11R-A137-07	860.431	1490.89	2351.32
TCGA-BK-A0CA-01B-02R-A277-07	-599.308	16.2183	-583.089
TCGA-A5-A0GA-01A-11R-A040-07	-695.997	140.659	-555.339
TCGA-D1-A179-01A-11R-A12I-07	-1240.28	-639.271	-1879.55
TCGA-BS-A0UL-01A-11R-A109-07	506.856	1421.89	1928.74
TCGA-B5-A11N-01A-11R-A118-07	-86.8184	2112.67	2025.86
TCGA-FI-A3PV-01A-11R-A22K-07	-1488.6	-896.152	-2384.76
TCGA-B5-A11J-01A-11R-A118-07	-1051.52	172.27	-879.245
TCGA-BS-A0T9-01A-11R-A12I-07	-499.139	613.583	114.444
TCGA-D1-A16I-01A-11R-A12I-07	-560.547	129.955	-430.592
TCGA-AJ-A3EM-01A-11R-A213-07	-1184.51	-1274.64	-2459.15
TCGA-D1-A1NX-01A-11R-A16F-07	-1047.6	-150.516	-1198.11
TCGA-D1-A16B-01A-11R-A12I-07	-477.904	596.146	118.241
TCGA-AX-A062-01A-11R-A00V-07	-858.915	-558.718	-1417.63
TCGA-AJ-A23M-01A-11R-A157-07	-808.409	-278.474	-1086.88
TCGA-B5-A121-01A-31R-A118-07	-934.001	-124.752	-1058.75
TCGA-AP-A0LN-01A-11R-A040-07	-1020.36	290.407	-729.956
TCGA-B5-A0K9-01A-21R-A104-07	-946.996	562.48	-384.515
TCGA-AX-A05U-01A-11R-A00V-07	-812.697	-554.946	-1367.64
TCGA-AP-A051-01A-21R-A00V-07	-872.286	263.292	-608.994
TCGA-EO-A22Y-01A-11R-A180-07	-826.265	-439.34	-1265.6
TCGA-A5-A1OG-01A-11R-A14D-07	-1281.38	538.795	-742.589
TCGA-D1-A162-01A-11R-A118-07	-1049.52	40.1067	-1009.41
TCGA-EY-A1GK-01A-11R-A13S-07	-597.233	922.379	325.147
TCGA-EY-A1GU-01A-11R-A13S-07	-1266.83	102.459	-1164.37
TCGA-AP-A0LE-01A-11R-A104-07	-999.399	-27.8267	-1027.23
TCGA-EC-A24G-01A-11R-A16F-07	-89.0418	628.307	539.265
TCGA-B5-A11L-01B-21R-A13S-07	-172.492	1203.07	1030.58
TCGA-AJ-A2QN-01A-11R-A18M-07	-738.12	-402.648	-1140.77
TCGA-BG-A0M3-01A-11R-A104-07	-1348.25	-198.533	-1546.78
TCGA-D1-A101-01A-12R-A10J-07	301.496	1408.22	1709.72
TCGA-AP-A1E3-01A-11R-A137-07	161.28	-84.7831	76.4965
TCGA-BG-A2AE-01A-11R-A16F-07	-989.516	912.725	-76.7913
TCGA-AX-A1CJ-01A-11R-A137-07	-929.671	907.986	-21.6847
TCGA-EY-A1GI-01A-11R-A13S-07	-684.47	38.6812	-645.789
TCGA-EY-A2OM-01A-11R-A18M-07	-369.328	-47.934	-417.262
TCGA-AJ-A2QO-01A-11R-A32Y-07	-1164.14	-149.845	-1313.98
TCGA-BK-A139-01A-11R-A118-07	-667.978	1174.25	506.275
TCGA-AJ-A2QK-01A-11R-A18M-07	-150.963	1350.56	1199.6
TCGA-D1-A16O-01A-11R-A12I-07	-729.054	-574.101	-1303.16
TCGA-D1-A2G7-01A-21R-A180-07	-1001.29	-678.954	-1680.24
TCGA-A5-A0G2-01A-11R-A16W-07	-710.985	704.042	-6.94253
TCGA-B5-A3FC-01A-11R-A22K-07	-89.0253	1270.96	1181.93
TCGA-AJ-A3I9-01A-11R-A22K-07	-1212.61	-595.191	-1807.8
TCGA-EC-A1NJ-01A-31R-A14D-07	-56.891	1220.38	1163.49
TCGA-E6-A2P8-01A-11R-A19W-07	-208.172	1114.89	906.719
TCGA-BS-A0UJ-01A-12R-A104-07	-917.128	773.154	-143.973
TCGA-AJ-A3BH-01A-11R-A19W-07	-630.489	341.894	-288.595
TCGA-A5-A0GE-01A-11R-A16W-07	-203.632	215.715	12.0836
TCGA-DI-A1BY-01A-21R-A137-07	-132.586	962.951	830.365
TCGA-PG-A916-01A-11R-A37O-07	-1057.2	54.2815	-1002.92
TCGA-AJ-A3EL-01A-11R-A213-07	-294.401	885.754	591.353
TCGA-H5-A2HR-01A-11R-A180-07	-1018.79	614.773	-404.016
TCGA-AJ-A23O-01A-11R-A157-07	-328.75	1220.73	891.979
TCGA-A5-A7WJ-01A-12R-A34R-07	-2099.82	-839.912	-2939.73
TCGA-AX-A1CI-01A-11R-A137-07	-1546.7	-286.488	-1833.19
TCGA-EY-A1GX-01A-12R-A13S-07	-1941.03	-1225.95	-3166.98
TCGA-D1-A16X-01A-11R-A12I-07	-515.944	1469.78	953.84
TCGA-AJ-A2QL-01A-11R-A18M-07	-722.829	1019.64	296.815
TCGA-B5-A11P-01B-11R-A14D-07	-1495.71	-606.629	-2102.34
TCGA-BK-A6W4-01A-12R-A34R-07	-114.74	39.7342	-75.0054
TCGA-EY-A2ON-01A-21R-A18M-07	-977.946	299.102	-678.843
TCGA-B5-A11S-01A-11R-A118-07	-564.929	117.187	-447.742
TCGA-AJ-A3NE-01A-11R-A22K-07	-847.893	556.083	-291.81
TCGA-B5-A11H-01A-11R-A118-07	-391.624	1091.01	699.381
TCGA-FI-A2EX-01A-11R-A17B-07	-1276.05	-71.2291	-1347.28
TCGA-AX-A3G7-01A-12R-A213-07	-791.374	673.521	-117.853
TCGA-FI-A2CX-01A-11R-A17B-07	375.47	3614.68	3990.15
TCGA-D1-A0ZS-01A-11R-A118-07	-813.944	-339.441	-1153.38
TCGA-AP-A1DO-01A-11R-A137-07	-2224.62	-384.823	-2609.45
TCGA-D1-A1NS-01A-11R-A14D-07	-1196.26	243.979	-952.285
TCGA-D1-A1NZ-01A-21R-A14D-07	-1046.94	531.792	-515.144
TCGA-BK-A0CC-01B-04R-A277-07	283.22	83.0144	366.234
TCGA-BG-A0VX-01A-11R-A118-07	-427.48	1085.74	658.26
TCGA-AX-A0IZ-01A-11R-A118-07	-190.688	1370.01	1179.33
TCGA-AX-A3G3-01A-11R-A213-07	-294.588	1697.44	1402.86
TCGA-AX-A2H2-01A-11R-A180-07	-1084.6	770.847	-313.757
TCGA-D1-A1NY-01A-11R-A16F-07	-496.592	69.7242	-426.868
TCGA-AP-A0LP-01A-12R-A104-07	-843.167	874.874	31.7073
TCGA-AP-A059-01A-21R-A118-07	-310.259	2065.16	1754.9
TCGA-AX-A0IU-01A-11R-A16W-07	-1179.41	-424.381	-1603.79
TCGA-BS-A0V7-01A-21R-A118-07	575.851	1747.62	2323.48
TCGA-EY-A72D-01A-12R-A34R-07	-1040.13	-710.281	-1750.41
TCGA-BG-A0LX-01A-11R-A16W-07	-177.201	380.177	202.977
TCGA-EO-A22R-01A-11R-A18M-07	-811.676	-42.2952	-853.971
TCGA-EO-A3KX-01A-11R-A22K-07	-1464.04	-682.857	-2146.9
TCGA-BK-A56F-01A-32R-A27V-07	-329.284	121.82	-207.464
TCGA-D1-A167-01A-11R-A12I-07	-1625.18	-772.041	-2397.22
TCGA-A5-A3LP-01A-11R-A22K-07	-1051.97	272.53	-779.437
TCGA-EY-A1GV-01A-11R-A13S-07	-758.123	584.339	-173.784
TCGA-A5-A0R8-01A-11R-A104-07	-314.542	1176.25	861.704
TCGA-EY-A1GM-01A-12R-A14D-07	-1469.53	-1079.66	-2549.19
TCGA-D1-A2G0-01A-11R-A32Y-07	-1564.01	467.165	-1096.85
TCGA-B5-A5OE-01A-11R-A31O-07	-1356.36	-457.706	-1814.06
TCGA-D1-A3DH-01A-11R-A19W-07	-1526.66	-889.234	-2415.89
TCGA-BG-A0MT-01A-11R-A104-07	-483.336	559.652	76.3155
TCGA-D1-A16F-01A-11R-A12I-07	-498.829	398.434	-100.395
TCGA-BK-A26L-01A-11R-A277-07	176.164	-215.223	-39.0595
TCGA-D1-A17F-01A-11R-A12I-07	-1015.85	1002.25	-13.6019
TCGA-D1-A2G5-01A-11R-A17B-07	-1599.64	-732.97	-2332.61
TCGA-BS-A0UV-01A-11R-A16W-07	-997.98	17.4387	-980.542
TCGA-A5-A0GV-01A-31R-A16W-07	-1591.56	-818.883	-2410.45
TCGA-BG-A0M6-01A-31R-A104-07	-986.221	-1359.51	-2345.73
TCGA-A5-A0GB-01A-11R-A040-07	-1391.34	-331.576	-1722.92
TCGA-D1-A0ZU-01A-11R-A10J-07	-716.378	-619.823	-1336.2
TCGA-A5-A0GI-01A-11R-A040-07	-918.778	167.489	-751.289
TCGA-QS-A5YQ-01A-11R-A31O-07	-794.635	977.49	182.855
TCGA-BG-A0M7-01A-11R-A040-07	-570.141	699.479	129.338
TCGA-AX-A1CF-01A-11R-A137-07	-1137.92	-265.622	-1403.54
TCGA-B5-A0KB-01B-11R-A14D-07	-332.682	1264.41	931.726
TCGA-D1-A3JP-01A-31R-A22K-07	-475.942	1146.67	670.725
TCGA-A5-A1OF-01A-11R-A14D-07	-668.336	1740.84	1072.51
TCGA-D1-A165-01A-11R-A12I-07	-697.527	-438.003	-1135.53
TCGA-AX-A3FS-01A-11R-A22K-07	-743.303	-57.1511	-800.454
TCGA-EO-A2CG-01A-12R-A180-07	-399.832	-471.061	-870.893
TCGA-AX-A3G1-01A-11R-A22K-07	-826.703	1126.99	300.29
TCGA-EO-A3AZ-01A-12R-A19W-07	17.5558	2114.05	2131.61
TCGA-FI-A2D0-01A-11R-A17B-07	-860.403	-79.6622	-940.065
TCGA-D1-A1O7-01A-11R-A14D-07	-1391.96	31.168	-1360.8
TCGA-KP-A3W3-01A-11R-A22K-07	-457.453	753.002	295.549
TCGA-EO-A22X-01A-11R-A180-07	-156.055	452.899	296.843
TCGA-EY-A1GH-01A-11R-A13S-07	-1052.91	103.668	-949.238
TCGA-AJ-A3OK-01A-12R-A22K-07	778.034	1389.53	2167.56
TCGA-D1-A17U-01A-21R-A12I-07	-656.518	265.642	-390.876
TCGA-BK-A0CC-01A-21R-A277-07	-871.052	-585.275	-1456.33
TCGA-AP-A05O-01A-12R-A118-07	-1005.04	741.536	-263.502
TCGA-BG-A0YU-01A-21R-A10J-07	-862.61	-432.476	-1295.09
TCGA-EY-A1GR-01A-11R-A13S-07	-512.02	727.388	215.368
TCGA-BG-A221-01A-21R-A157-07	-464.2	1109.2	645.005
TCGA-FI-A2D4-01A-12R-A17B-07	-851.45	-523.625	-1375.07
TCGA-D1-A17T-01A-11R-A12I-07	-1174.97	492.556	-682.415
TCGA-D1-A16S-01A-11R-A12I-07	-712.718	-361.187	-1073.9
TCGA-K6-A3WQ-01A-11R-A22K-07	-946.523	-348.272	-1294.8
TCGA-AP-A1DH-01A-31R-A137-07	-629.415	1242.5	613.081
TCGA-BG-A3EW-01A-11R-A22K-07	-1198.14	-444.294	-1642.44
TCGA-A5-A0G5-01A-11R-A040-07	98.5943	2499.68	2598.27
TCGA-AJ-A3OL-01A-11R-A22K-07	-1676	-1149.75	-2825.75
TCGA-EY-A1GE-01A-11R-A13S-07	-610.82	673.637	62.8175
TCGA-B5-A0JN-01A-11R-A104-07	-1271.13	-802.532	-2073.66
TCGA-DI-A2QY-01A-12R-A19W-07	-1128.17	-682.799	-1810.97
TCGA-PG-A6IB-01A-21R-A31O-07	-319.982	1853.39	1533.41
TCGA-DI-A1BU-01A-11R-A137-07	-859.268	162.005	-697.263
TCGA-AJ-A3BD-01A-11R-A19W-07	-1107.52	762.154	-345.362
TCGA-D1-A17L-01A-11R-A12I-07	-888.784	1126.47	237.683
TCGA-AJ-A3QS-01A-11R-A22K-07	-873.966	939.753	65.787
TCGA-AX-A0IS-01A-12R-A10J-07	-763.292	-72.2186	-835.51
TCGA-AX-A3G9-01A-11R-A22K-07	-1502.74	-888.837	-2391.57
TCGA-AX-A1C7-01A-11R-A137-07	-1090.61	-364.973	-1455.58
TCGA-AP-A0LG-01A-11R-A16W-07	-1525.14	-511.342	-2036.49
TCGA-D1-A17H-01A-11R-A12I-07	2.93475	559.925	562.859
TCGA-AX-A2HG-01A-11R-A17B-07	-906.395	544.815	-361.58
TCGA-D1-A17B-01A-22R-A12I-07	314.486	1942.52	2257.01
TCGA-DF-A2KR-01A-11R-A180-07	-1518.57	462.766	-1055.81
TCGA-EY-A1GQ-01A-21R-A13S-07	-327.374	-195.258	-522.632
TCGA-AX-A06J-01A-11R-A00V-07	-1822.8	567.046	-1255.75
TCGA-EY-A214-01A-12R-A157-07	-530.832	876.959	346.127
TCGA-QF-A5YT-01A-11R-A31O-07	-964.382	-400.755	-1365.14
TCGA-AP-A054-01A-11R-A16W-07	-1516.09	-927.365	-2443.45
TCGA-AX-A06B-01A-11R-A00V-07	-99.3639	480.107	380.743
TCGA-A5-A7WK-01A-11R-A34R-07	-1191.88	-455.45	-1647.33
TCGA-D1-A15Z-01A-11R-A118-07	-1179.11	-235.231	-1414.34
TCGA-B5-A0K8-01A-11R-A14M-07	-908.889	289.595	-619.294
TCGA-AP-A1E4-01A-12R-A137-07	-966.701	-1133.4	-2100.11
TCGA-AJ-A3NG-01A-11R-A22K-07	-1011.39	-998.946	-2010.33
TCGA-AJ-A5DW-01A-11R-A27V-07	-600.921	-245.126	-846.047
TCGA-DF-A2KY-01A-21R-A213-07	-765.938	1087.19	321.254
TCGA-D1-A0ZV-01A-11R-A10J-07	-301.132	1459.27	1158.13
TCGA-AP-A1DR-01A-11R-A137-07	-1232.08	-85.0445	-1317.12
TCGA-AP-A056-01A-11R-A00V-07	216.558	674.363	890.921
TCGA-EY-A1GF-01A-11R-A13S-07	-976.444	-58.3429	-1034.79
TCGA-D1-A163-01A-11R-A12I-07	-452.809	351.669	-101.14
TCGA-A5-A0G9-01A-11R-A040-07	-975.906	455.023	-520.884
TCGA-AX-A1C9-01A-11R-A137-07	-806.815	529.685	-277.13
TCGA-B5-A1MW-01A-11R-A32Y-07	-1506.13	-903.806	-2409.94
TCGA-D1-A168-01A-31R-A12I-07	-67.1502	-242.826	-309.976
TCGA-D1-A16Y-01A-31R-A12I-07	-983.501	-473.575	-1457.08
TCGA-A5-A1OH-01A-21R-A22K-07	-505.71	-1345.09	-1850.8
TCGA-B5-A1MU-01A-11R-A13S-07	592.892	1297.2	1890.09
TCGA-D1-A17K-01A-11R-A12I-07	-1545.61	-58.7463	-1604.35
TCGA-A5-A2K5-01A-11R-A180-07	-669.129	626.654	-42.4749
TCGA-AP-A1E0-01A-11R-A137-07	-565.642	-179.237	-744.879
TCGA-A5-A1OK-01A-11R-A14M-07	-508.872	195.299	-313.573
TCGA-AX-A0IW-01A-11R-A040-07	-1032.01	-138.195	-1170.2
TCGA-DF-A2KV-01A-11R-A180-07	-1104.8	1021.36	-83.4453
TCGA-AX-A05W-01A-21R-A466-07	-1012.17	1124.75	112.584
TCGA-AJ-A3BG-01A-11R-A19W-07	-1604.76	-143.96	-1748.72
TCGA-DF-A2KU-01A-11R-A180-07	-508.738	1844.67	1335.93
TCGA-BK-A26L-01C-04R-A277-07	-312.704	-638.128	-950.832
TCGA-B5-A0JT-01A-21R-A118-07	-854.831	1.6435	-853.188
TCGA-AP-A0LJ-01A-11R-A040-07	-593.15	906.184	313.034
TCGA-AP-A1DP-01A-11R-A137-07	-1493.05	-271.611	-1764.66
TCGA-D1-A17N-01A-11R-A12I-07	137.754	1279.17	1416.93
TCGA-B5-A3S1-01A-11R-A22K-07	-886.493	122.857	-763.636
TCGA-BG-A0MK-01A-51R-A19W-07	-612.387	130.955	-481.432
TCGA-BS-A0U7-01A-21R-A104-07	-203.041	767.433	564.392
TCGA-KP-A3W1-01A-11R-A22K-07	-25.593	1957.26	1931.67
TCGA-AX-A3FW-01A-11R-A22K-07	-1592.14	-628.737	-2220.88
TCGA-FI-A2D6-01A-11R-A17B-07	-860.135	850.419	-9.7158
TCGA-EO-A22U-01A-11R-A180-07	-1335.15	-389.973	-1725.12
TCGA-BK-A139-01A-11R-A277-07	-324.893	906.979	582.087
TCGA-EO-A3KW-01A-11R-A22K-07	-973.357	685.469	-287.887
TCGA-EO-A3AY-01A-12R-A19W-07	-674.415	1150.79	476.375
TCGA-D1-A17S-01A-11R-A12I-07	-1188.72	-64.5142	-1253.23
TCGA-D1-A3JQ-01A-11R-A22K-07	-686.805	164.051	-522.754
TCGA-B5-A3FH-01A-11R-A19W-07	-1241.75	169.939	-1071.81
TCGA-BS-A0V6-01A-11R-A118-07	-852.104	765.079	-87.025
TCGA-DI-A0WH-01A-12R-A12I-07	-1273.83	-86.9938	-1360.82
TCGA-FI-A3PX-01A-11R-A22K-07	-1418.57	-743.615	-2162.19
TCGA-EY-A2OQ-01A-11R-A19W-07	-822.282	-139.667	-961.949
TCGA-AX-A3FZ-01A-11R-A22K-07	-901.742	-1069.8	-1971.54
TCGA-KP-A3W0-01A-21R-A22K-07	-503.37	809.152	305.782
TCGA-B5-A1MR-01A-31R-A14D-07	-119.62	2515.11	2395.49
TCGA-AJ-A3IA-01A-11R-A213-07	210.674	634.57	845.245
TCGA-D1-A161-01A-11R-A118-07	-1118.8	125.511	-993.285
TCGA-DF-A2KZ-01A-11R-A213-07	-189.475	792.412	602.936
TCGA-D1-A103-01A-11R-A10J-07	-666.463	461.248	-205.215
TCGA-A5-A0RA-01A-21R-A104-07	-1062.36	290.418	-771.938
TCGA-B5-A0JV-01A-11R-A104-07	-1311.87	-409.389	-1721.26
TCGA-PG-A7D5-01A-11R-A34R-07	-988.675	-612.911	-1601.59
TCGA-AJ-A23N-01A-11R-A22K-07	281.497	474.06	755.558
TCGA-EO-A2CH-01A-11R-A180-07	-1643.73	-210.208	-1853.94
TCGA-EY-A1GP-01A-11R-A13S-07	-304.599	214.011	-90.5882
TCGA-BK-A0CA-01A-21R-A277-07	-1039.33	-112.886	-1152.22
TCGA-JU-AAVI-01A-11R-A40A-07	-695.152	1481.88	786.726
TCGA-AJ-A3NC-01A-11R-A22K-07	-1163.26	71.4453	-1091.81
TCGA-AP-A0LM-01A-11R-A118-07	592.016	1529.74	2121.75
TCGA-E6-A1LX-01A-11R-A14D-07	-1470.68	-483.08	-1953.76
TCGA-FI-A2D5-01A-11R-A17B-07	-425.732	60.914	-364.818
TCGA-BS-A0TA-01A-11R-A104-07	-188.749	2517.57	2328.82
TCGA-D1-A15W-01A-11R-A118-07	-679.815	555.523	-124.292
TCGA-B5-A3FB-01A-11R-A19W-07	-1420.15	49.3622	-1370.79
TCGA-BG-A0VT-01A-11R-A10J-07	-232.465	227.395	-5.06973
TCGA-B5-A1N2-01A-21R-A144-07	-440.421	23.416	-417.005
TCGA-AW-A1PO-01A-12R-A157-07	-1378.8	-847.435	-2226.24
TCGA-AP-A05N-01A-11R-A00V-07	-549.454	-419.02	-968.474
TCGA-EC-A1QX-01A-31R-A16F-07	-320.332	1062.15	741.814
TCGA-D1-A1O5-01A-11R-A14D-07	-821.295	175.771	-645.524
TCGA-QS-A744-01A-11R-A34R-07	-928.981	-1333.98	-2262.96
TCGA-DI-A2QT-01A-12R-A19W-07	-1235.34	-279.02	-1514.36
TCGA-B5-A1MX-01A-11R-A144-07	-574.948	581.77	6.82141
TCGA-AX-A05Z-01A-11R-A00V-07	-300.327	1879	1578.67
TCGA-AJ-A3BF-01A-11R-A213-07	-1105.06	-398.581	-1503.65
TCGA-AX-A1CP-01A-11R-A137-07	-714.717	-30.8604	-745.578
TCGA-AX-A06F-01A-11R-A00V-07	-543.643	1098.7	555.06
TCGA-BK-A0CB-01A-32R-A104-07	501.232	645.841	1147.07
TCGA-AX-A06H-01A-11R-A118-07	247.819	2088.62	2336.44
TCGA-2E-A9G8-01A-11R-A40A-07	-1479.54	267.6	-1211.94
TCGA-AX-A3FX-01A-11R-A22K-07	-666.589	327.489	-339.101
TCGA-PG-A915-01A-11R-A37O-07	-1397.58	-676.798	-2074.38
TCGA-BK-A13B-01A-51R-A22K-07	-1107.31	324.432	-782.873
TCGA-AX-A2H8-01A-11R-A17B-07	-1139.75	49.4791	-1090.27
TCGA-AX-A2IO-01A-11R-A180-07	-338.575	-17.7839	-356.359
TCGA-SJ-A6ZI-01A-12R-A34R-07	-576.806	1511.32	934.512
TCGA-D1-A0ZN-01A-11R-A118-07	-392.918	278.866	-114.052
TCGA-AJ-A8CT-01A-11R-A37O-07	-127.901	1771.64	1643.74
TCGA-B5-A5OD-01A-11R-A31O-07	-782.81	876.185	93.3748
TCGA-EY-A212-01A-11R-A14M-07	-1291.15	-538.444	-1829.59
TCGA-AX-A3G8-01A-11R-A22K-07	-1637.45	-448.745	-2086.19
TCGA-B5-A0K0-01A-11R-A16W-07	-16.1249	1181.96	1165.84
TCGA-BG-A0VV-01A-21R-A118-07	-754.52	408.316	-346.203
TCGA-EO-A3B1-01A-12R-A19W-07	-269.399	1061.44	792.041
TCGA-BG-A186-01A-11R-A12I-07	-574.21	329.568	-244.642
TCGA-AP-A1DM-01A-21R-A137-07	-967.958	-204.127	-1172.08
TCGA-EO-A3B0-01A-12R-A19W-07	-299.555	379.206	79.6505
TCGA-EO-A22S-01A-11R-A18M-07	-1431.22	-845.054	-2276.27
TCGA-BG-A0W2-01A-11R-A109-07	-461.532	344.513	-117.019
TCGA-EY-A1G8-01A-11R-A13S-07	-1517.57	-751.598	-2269.17
TCGA-BG-A3PP-01A-11R-A22K-07	-284.465	-432.169	-716.635
TCGA-BK-A0CC-01A-21R-A16W-07	-927.136	-439.952	-1367.09
TCGA-BG-A0MG-01A-21R-A104-07	-1250.87	342.008	-908.863
TCGA-EY-A2OP-01A-11R-A19W-07	-1622.67	-514.738	-2137.4
TCGA-BK-A6W3-01A-12R-A34R-07	-695.733	937.041	241.308
TCGA-E6-A2P9-01A-11R-A19W-07	-1467.49	211.837	-1255.65
TCGA-AP-A0LF-01A-11R-A118-07	-959.881	2058.53	1098.64
TCGA-B5-A0JU-01B-11R-A14D-07	-1484.5	-675.526	-2160.03
TCGA-BG-A0MO-01A-11R-A040-07	-1323.35	773.691	-549.655
TCGA-D1-A17Q-01A-11R-A12I-07	-742.226	-565.627	-1307.85
TCGA-EO-A3AS-01A-11R-A19W-07	-572.418	121.515	-450.903
TCGA-B5-A1MS-01B-11R-A22K-07	-1244.68	-793.383	-2038.07
TCGA-D1-A1NW-01A-11R-A14M-07	-1006.2	239.976	-766.224
TCGA-AX-A2HF-01A-11R-A17B-07	-1470.78	70.2766	-1400.5
TCGA-A5-A2K7-01A-11R-A180-07	-712.908	185.822	-527.087
TCGA-D1-A15X-01A-11R-A118-07	-1351.22	1254.63	-96.5973
TCGA-AP-A0L9-01A-11R-A040-07	-1516.04	-371.701	-1887.74
TCGA-DI-A1NN-01A-11R-A16F-07	-516.519	1149.88	633.365
TCGA-A5-A0VQ-01A-11R-A104-07	-833.68	418.205	-415.476
TCGA-BG-A0MA-01A-11R-A17B-07	-480.454	-115.273	-595.727
TCGA-BG-A18A-01A-21R-A12I-07	48.588	447.537	496.125
TCGA-AX-A3GI-01A-11R-A213-07	-1822.16	-960.262	-2782.42
TCGA-BS-A0TI-01A-11R-A104-07	-366.128	1011.67	645.539
TCGA-AX-A06L-01A-11R-A118-07	-138.89	1057.74	918.847
TCGA-AP-A052-01A-11R-A00V-07	-454.331	285.976	-168.355
TCGA-AX-A2HD-01A-21R-A17B-07	-1213.34	-93.1803	-1306.52
TCGA-BS-A0TC-01A-11R-A104-07	-1293.89	181.405	-1112.49
TCGA-AP-A05D-01A-11R-A00V-07	-403.346	1274.48	871.131
TCGA-A5-A3LO-01A-11R-A22K-07	-1115.74	-250.403	-1366.14
TCGA-EY-A549-01A-11R-A27V-07	-1340.17	40.1436	-1300.03
TCGA-AP-A1DK-01A-11R-A137-07	-480.424	1080.31	599.885
TCGA-D1-A176-01A-11R-A12I-07	-1189.75	157.242	-1032.51
TCGA-EY-A54A-01A-11R-A27V-07	-382.896	784.004	401.107
TCGA-EY-A547-01A-11R-A27V-07	-1624.74	-493.234	-2117.97
TCGA-BG-A18C-01A-11R-A12I-07	-1138.63	62.5947	-1076.04
TCGA-BS-A0U8-01A-11R-A104-07	-719.983	-167.487	-887.47
TCGA-D1-A160-01A-11R-A118-07	-625.331	973.884	348.553
TCGA-KP-A3W4-01A-11R-A22K-07	-132.185	168.525	36.3405
TCGA-A5-A0VP-01A-21R-A104-07	-1390.27	197.266	-1193
TCGA-B5-A1MZ-01A-11R-A144-07	-418.409	729.984	311.575
TCGA-A5-A0GH-01A-21R-A16W-07	-1585.89	-811.882	-2397.77
TCGA-A5-A0G3-01A-11R-A040-07	-1166.69	-866.017	-2032.71
TCGA-FI-A2F4-01A-11R-A17B-07	-961.166	960.954	-0.211348
TCGA-B5-A0K1-01A-11R-A16W-07	-1384.67	-530.463	-1915.13
TCGA-4E-A92E-01A-11R-A37O-07	-595.37	857.158	261.788
TCGA-AP-A053-01A-21R-A00V-07	-1202.99	-614.03	-1817.02
TCGA-AP-A0LD-01A-11R-A040-07	-843.588	-367.259	-1210.85
TCGA-EO-A3AU-01A-21R-A19W-07	-638.081	552.123	-85.9589
TCGA-AP-A1DQ-01A-11R-A137-07	-829.241	-98.1982	-927.439
TCGA-DF-A2KN-01A-11R-A180-07	-326.065	1534.77	1208.71
TCGA-BG-A0MS-01A-11R-A104-07	-775.178	297.539	-477.639
TCGA-AX-A2H7-01A-12R-A18M-07	-1285.72	-342.972	-1628.69
TCGA-D1-A0ZZ-01A-11R-A10J-07	-1491.11	-1163.94	-2655.04
TCGA-EY-A548-01A-11R-A27V-07	-738.993	436.212	-302.781
TCGA-AX-A1C5-01A-11R-A137-07	-1185	-388.42	-1573.42
TCGA-A5-A0GW-01A-11R-A16W-07	251.212	1525.69	1776.9
TCGA-AP-A1DV-01A-21R-A137-07	-1485.55	-221.667	-1707.21
TCGA-B5-A11Y-01A-21R-A10J-07	-601.555	1636	1034.45
TCGA-BK-A139-01C-08R-A277-07	-193.159	475.312	282.153
TCGA-AP-A0LI-01A-11R-A040-07	-331.763	1711.77	1380.01
TCGA-D1-A3DA-01A-12R-A213-07	-1137	-76.4922	-1213.5
TCGA-E6-A1LZ-01A-11R-A144-07	-1481.69	390.225	-1091.46
TCGA-SJ-A6ZJ-01A-12R-A34R-07	-708.204	32.487	-675.717
TCGA-AX-A2HH-01A-11R-A32Y-07	-1629.3	-1272.2	-2901.5
TCGA-BS-A0TD-01A-11R-A104-07	-939.408	309.625	-629.783
TCGA-BS-A0U5-01A-11R-A109-07	-1005.7	-399.266	-1404.97
TCGA-AX-A1CA-01A-12R-A137-07	-1176.18	208.617	-967.565
TCGA-D1-A17M-01A-21R-A12I-07	-999.259	174.672	-824.587
TCGA-BS-A0UF-01A-11R-A104-07	-499.462	1316.79	817.33
TCGA-AJ-A3NF-01A-11R-A22K-07	516.332	1045.18	1561.51
TCGA-FI-A2EY-01A-12R-A18M-07	-1385.76	-667.765	-2053.53
TCGA-BG-A0W1-01A-12R-A109-07	-1098.88	99.1578	-999.724
TCGA-A5-A0GG-01A-11R-A118-07	-178.432	569.675	391.243
TCGA-AP-A0LV-01A-11R-A040-07	-358.405	202.771	-155.634
TCGA-EY-A2OO-01A-11R-A19W-07	-1152.42	-638.252	-1790.67
TCGA-SL-A6JA-01A-11R-A31O-07	-1814.94	-686.772	-2501.71
TCGA-AP-A5FX-01A-11R-A27V-07	-1134.88	547.965	-586.917
TCGA-A5-A0GP-01A-11R-A040-07	-1034.36	-43.0024	-1077.36
TCGA-D1-A0ZO-01A-11R-A118-07	-76.4845	575.648	499.163
TCGA-B5-A11W-01A-12R-A118-07	-580.108	70.4326	-509.676
TCGA-A5-AB3J-01A-11R-A40A-07	390.278	679.518	1069.8
TCGA-AX-A2HA-01A-12R-A18M-07	-1240.68	302.45	-938.229
TCGA-AP-A1E1-01A-11R-A137-07	-1289.86	272.048	-1017.82
TCGA-AJ-A3TW-01A-11R-A22K-07	-848.252	1538.14	689.89
TCGA-D1-A16R-01A-11R-A12I-07	-276.797	694.219	417.422
TCGA-BG-A0MU-01A-11R-A104-07	-962.7	860.651	-102.049
TCGA-D1-A15V-01A-11R-A118-07	-1067.44	-29.1189	-1096.55
TCGA-AX-A2H5-01A-11R-A17B-07	-1552.82	-238.262	-1791.09
TCGA-A5-A0GJ-01A-11R-A040-07	-230.645	984.378	753.733
TCGA-E6-A8L9-01A-21R-A37O-07	-168.124	602.996	434.872
TCGA-AX-A1CE-01A-11R-A137-07	-1460.76	-437.227	-1897.99
TCGA-A5-A0R6-01A-11R-A104-07	-402.976	58.929	-344.047
TCGA-AX-A3G4-01A-11R-A213-07	-17.329	-559.974	-577.303
TCGA-AP-A0LH-01A-11R-A16W-07	-1302.52	26.2227	-1276.3
TCGA-PG-A5BC-01A-12R-A27V-07	-536.048	-704.097	-1240.14
TCGA-B5-A3F9-01A-21R-A22K-07	-607.618	378.19	-229.428
TCGA-EY-A1GD-01A-11R-A13S-07	-1205.81	-210.492	-1416.3
TCGA-AX-A1C4-01A-11R-A137-07	-1672.48	-1187.73	-2860.21
TCGA-AX-A1CK-01A-11R-A137-07	-1315.52	-934.78	-2250.29
TCGA-BG-A220-01A-11R-A157-07	-1544.22	-946.516	-2490.73
TCGA-AJ-A3OJ-01A-11R-A22K-07	-477.757	669.157	191.399
TCGA-BS-A0WQ-01A-21R-A109-07	-1386.8	-443.786	-1830.59
TCGA-A5-A2K4-01A-11R-A18M-07	-542.038	-44.8375	-586.876
TCGA-A5-A1OJ-01A-11R-A14D-07	738.281	1205.93	1944.21
TCGA-B5-A11G-01A-13R-A118-07	-797.139	584.731	-212.408
TCGA-BG-A187-01A-11R-A12I-07	-656.944	202.228	-454.717
TCGA-BG-A2L7-01A-11R-A18M-07	-345.619	1059.96	714.341
TCGA-B5-A5OC-01A-21R-A27V-07	350.674	1699.37	2050.04
TCGA-B5-A11V-01A-11R-A10J-07	-890.622	-331.363	-1221.98
TCGA-D1-A17D-01A-12R-A12I-07	-701.491	917.492	216.001
TCGA-A5-A0GU-01A-11R-A16W-07	-806.946	477.426	-329.52
TCGA-EY-A1GS-01A-11R-A13S-07	-1519.03	110.886	-1408.15
TCGA-AX-A1CN-01A-11R-A137-07	-952.524	-824.514	-1777.04
TCGA-B5-A11X-01A-11R-A10J-07	89.024	1168.73	1257.75
TCGA-EO-A1Y7-01A-11R-A157-07	-1635.09	12.064	-1623.03
TCGA-FI-A2CY-01A-11R-A17B-07	-675.075	1454.08	779.005
TCGA-A5-A0GX-01A-11R-A040-07	120.387	820.517	940.904
TCGA-B5-A0JX-01A-21R-A14M-07	-439.949	846.792	406.843
TCGA-D1-A175-01A-11R-A12I-07	-1105.57	-594.477	-1700.05
TCGA-BS-A0UM-01A-11R-A104-07	-987.757	1512.94	525.181
TCGA-SL-A6J9-01A-11R-A31O-07	-805.575	1891.97	1086.39
TCGA-BK-A26L-01A-11R-A16F-07	134.24	154.993	289.234
TCGA-D1-A169-01A-11R-A12I-07	45.3192	1278.59	1323.91
TCGA-EO-A3L0-01A-11R-A22K-07	-762.309	-398.187	-1160.5
TCGA-D1-A17R-01A-11R-A12I-07	-546.444	-113.728	-660.172
TCGA-BG-A0MC-01A-21R-A040-07	-330.516	1173.75	843.236
TCGA-BG-A0MH-01A-11R-A118-07	399.462	1298.84	1698.3
TCGA-AX-A0J1-01A-11R-A040-07	-959.942	339.202	-620.74
TCGA-B5-A11U-01A-11R-A118-07	727.105	285.023	1012.13
TCGA-PG-A917-01A-31R-A37O-07	-729.344	1060.28	330.938
TCGA-QS-A5YR-01A-31R-A31O-07	-431.198	1146.42	715.225
TCGA-D1-A102-01A-11R-A10J-07	-382.861	469.25	86.3894
TCGA-B5-A11Z-01A-11R-A10J-07	-1184.81	-465.963	-1650.77
TCGA-B5-A11M-01A-11R-A118-07	443.955	63.9696	507.924
TCGA-EY-A215-01A-11R-A14M-07	-1764.58	219.937	-1544.64
TCGA-B5-A11Q-01A-11R-A118-07	-1773.74	-964.786	-2738.53
TCGA-PG-A914-01A-11R-A37O-07	-1119.12	376.355	-742.762
TCGA-EY-A210-01A-11R-A157-07	-824.432	1339.53	515.099
TCGA-AJ-A3EJ-01A-11R-A19W-07	-37.3359	512.598	475.262
TCGA-BG-A0VW-01A-11R-A118-07	-490.352	962.953	472.602
TCGA-AX-A060-01A-11R-A00V-07	-1618.81	-555.327	-2174.13
TCGA-D1-A0ZP-01A-21R-A10J-07	-778.802	-618.154	-1396.96
TCGA-DF-A2L0-01A-11R-A180-07	-573.823	963.034	389.211
TCGA-A5-A0G1-01A-11R-A118-07	-478.007	2510.6	2032.6
TCGA-EY-A1GO-01A-11R-A14D-07	-1605.4	-960.281	-2565.68
TCGA-B5-A11E-01A-11R-A10J-07	-1130.35	-300.645	-1431
TCGA-AP-A05A-01A-11R-A00V-07	-1242.11	-839.83	-2081.94
TCGA-BK-A4ZD-01A-11R-A27V-07	-1093.92	-1063.08	-2157
TCGA-BG-A0M0-01A-11R-A104-07	-1204.82	-774.093	-1978.91
TCGA-EY-A1G7-01A-11R-A13S-07	-1267.57	-699.95	-1967.52
TCGA-AX-A2HK-01A-11R-A17B-07	-1031.71	-654.741	-1686.45
TCGA-BS-A0VI-01A-11R-A14D-07	-136.031	47.2904	-88.741
TCGA-AP-A0LT-01A-11R-A040-07	-1717.68	-323.282	-2040.96
TCGA-EY-A1GL-01A-11R-A13S-07	-722.461	-341.939	-1064.4
TCGA-AP-A05H-01A-11R-A00V-07	-503.616	-680.228	-1183.84
TCGA-DI-A1NO-01A-31R-A157-07	-1656.24	-911.547	-2567.78
TCGA-A5-A0GN-01A-11R-A040-07	-302.066	1379.89	1077.82
TCGA-D1-A177-01A-21R-A12I-07	-1522.88	-1059.36	-2582.25
TCGA-BG-A0VZ-01A-11R-A109-07	-585.869	696.684	110.815
TCGA-AX-A1C8-01A-11R-A137-07	-1132.14	-704.308	-1836.45
TCGA-B5-A0JS-01A-11R-A104-07	-398.309	1087.12	688.812
TCGA-FI-A2F9-01A-11R-A17B-07	-658.413	-1213.65	-1872.06
TCGA-B5-A0K4-01A-11R-A040-07	-1187.51	-243.573	-1431.09
TCGA-EO-A3AV-01A-12R-A19W-07	-491.625	1791.1	1299.47
TCGA-BG-A2AD-01A-21R-A16F-07	-981.866	-1293.55	-2275.42
TCGA-BS-A0TJ-01A-11R-A104-07	-603.466	-54.4315	-657.897
TCGA-D1-A3DG-01A-11R-A19W-07	-1508.83	-871.783	-2380.62
TCGA-D1-A16D-01A-11R-A12I-07	-566.561	701.005	134.444
TCGA-D1-A17A-01A-11R-A12I-07	-552.928	351.33	-201.597
TCGA-EY-A1GC-01A-11R-A13S-07	-860.217	1458.38	598.161
TCGA-EO-A1Y8-01A-11R-A157-07	-1149.28	-450.04	-1599.32
TCGA-AX-A2HJ-01A-11R-A17B-07	-10.0829	109.646	99.5632
TCGA-D1-A16V-01A-11R-A12I-07	-911.705	644.856	-266.849
TCGA-D1-A1NU-01A-11R-A14D-07	-1077.88	233.85	-844.032
TCGA-BK-A13C-01A-11R-A118-07	-1141.83	-269.801	-1411.63
TCGA-BG-A0LW-01A-11R-A16W-07	-1294.07	91.7877	-1202.28
TCGA-EY-A3QX-01A-11R-A22K-07	-1133.14	281.151	-851.988
TCGA-AX-A2IN-01A-12R-A180-07	199.301	550.6	749.902
TCGA-EO-A3KU-01A-11R-A22K-07	-1312.65	-264.221	-1576.87
TCGA-AX-A1CR-01A-12R-A137-07	-858.044	453.399	-404.645
TCGA-5S-A9Q8-01A-11R-A40A-07	-1082.82	-110.067	-1192.89
TCGA-B5-A0K7-01A-11R-A104-07	-683.734	1049.96	366.229
TCGA-A5-A0GQ-01A-11R-A118-07	-757.821	1301.26	543.439
TCGA-BS-A0UT-01A-11R-A104-07	-563.253	-409.993	-973.246
TCGA-A5-A0GD-01A-11R-A16W-07	-1379.48	613.181	-766.301
TCGA-BG-A0M2-01A-11R-A104-07	-1023.14	274.374	-748.762
TCGA-AX-A3FT-01A-11R-A22K-07	-450.452	1937.1	1486.65
TCGA-A5-A2K2-01A-11R-A18M-07	-1783	-517.121	-2300.12
TCGA-BS-A0V8-01A-11R-A118-07	-452.473	516.41	63.9368
TCGA-E6-A1M0-01A-11R-A144-07	-816.68	75.9449	-740.735
TCGA-EO-A1Y5-01A-11R-A157-07	-568.192	1130.85	562.659
TCGA-B5-A0JY-01A-11R-A104-07	-238.161	323.744	85.5825
TCGA-BG-A0MI-01A-11R-A040-07	-923.145	426.835	-496.31
TCGA-FI-A2EU-01A-11R-A17B-07	-1887.54	-917.617	-2805.16
TCGA-EY-A5W2-01A-11R-A31O-07	-771.483	508.596	-262.887
TCGA-FI-A2F8-01A-12R-A17B-07	-640.374	61.5158	-578.858
TCGA-AJ-A8CV-01A-11R-A37O-07	-735.079	838.684	103.605
TCGA-A5-A0GM-01A-11R-A040-07	-552.815	-165.874	-718.689
TCGA-EY-A3L3-01A-11R-A22K-07	-1667.06	-1004.53	-2671.59
TCGA-AX-A064-01A-11R-A00V-07	-799.295	56.6633	-742.632
TCGA-D1-A1O8-01A-11R-A14D-07	-60.1776	2037.35	1977.17
TCGA-B5-A3FA-01A-11R-A19W-07	-1213.53	-78.0814	-1291.62
TCGA-B5-A11O-01A-11R-A118-07	-41.548	818.601	777.053
TCGA-B5-A0K2-01A-12R-A104-07	-72.505	1806.94	1734.44
TCGA-AX-A2HC-01A-11R-A17B-07	-1314.5	-911.665	-2226.17
TCGA-BG-A0M8-01A-12R-A104-07	759.748	2130.27	2890.02
TCGA-AP-A3K1-01A-11R-A213-07	-719.778	-189.444	-909.222
TCGA-AJ-A3BK-01A-11R-A19W-07	-699.68	1154.59	454.908
TCGA-D1-A1O0-01A-11R-A17B-07	-1295.72	-482.552	-1778.27
TCGA-AX-A3G6-01A-11R-A213-07	-1537.04	223.436	-1313.6
TCGA-D1-A0ZR-01A-21R-A10J-07	-1310.07	-492.963	-1803.03
TCGA-BG-A0M9-01A-21R-A104-07	-921.305	-223.297	-1144.6
TCGA-BK-A139-02A-11R-A27V-07	137.874	61.4329	199.307
TCGA-EY-A1H0-01A-11R-A13S-07	-1759.82	-714.063	-2473.88
TCGA-BG-A18B-01A-11R-A12I-07	-960.473	715.209	-245.264
TCGA-AP-A0LL-01A-12R-A104-07	-651.884	279.258	-372.627
TCGA-EY-A1GT-01A-11R-A13S-07	-461.301	-300.74	-762.041
TCGA-DI-A2QU-01A-11R-A18M-07	-1042.66	-281.065	-1323.73
TCGA-D1-A17C-01A-11R-A12I-07	457.543	773.532	1231.08
TCGA-AJ-A3BI-01A-11R-A213-07	-802.605	1051.72	249.116
TCGA-A5-A0VO-01A-21R-A109-07	-375.211	243.108	-132.104
TCGA-EO-A22T-01A-21R-A18M-07	-430.799	616.219	185.42
TCGA-AX-A3GB-01A-11R-A22K-07	-524.089	715.68	191.591
TCGA-AX-A0J0-01A-11R-A109-07	-1136.49	-341.165	-1477.65
TCGA-B5-A3FD-01A-11R-A19W-07	-678.863	-137.834	-816.697
TCGA-AX-A05T-01A-11R-A00V-07	-761.249	56.2808	-704.968
TCGA-BS-A0V4-01A-11R-A14D-07	-624.234	411.641	-212.592
TCGA-A5-A0R9-01A-11R-A104-07	-293.41	653.215	359.805
TCGA-A5-A0R7-01A-31R-A16W-07	325.936	904.207	1230.14
TCGA-B5-A0K6-01A-11R-A040-07	-667.426	875.67	208.245
TCGA-BG-A222-01A-11R-A157-07	-1231.7	113.998	-1117.7
TCGA-EY-A4KR-01A-11R-A27V-07	-342.598	1397.02	1054.42
TCGA-AJ-A2QM-01A-11R-A18M-07	-1340.4	-896.637	-2237.04
TCGA-AJ-A5DV-01A-11R-A27V-07	-1233.64	614.159	-619.478
TCGA-AJ-A3EK-01A-11R-A19W-07	-235.755	904.23	668.475
TCGA-AP-A0L8-01A-11R-A040-07	-896.959	-1069.61	-1966.57
TCGA-BG-A0YV-01A-11R-A10J-07	-1057.61	-602.678	-1660.29
TCGA-A5-A0GR-01A-11R-A118-07	-11.0715	1833.08	1822.01
TCGA-QF-A5YS-01A-11R-A31O-07	-1449.71	401.819	-1047.89
TCGA-BS-A0TG-01A-32R-A16W-07	200.977	903.222	1104.2
TCGA-BG-A0M4-01A-11R-A104-07	-563.669	290.566	-273.104
TCGA-AP-A05J-01A-11R-A00V-07	-1215.04	-661.75	-1876.79
TCGA-EY-A1GW-01A-22R-A13S-07	-1234.78	-177.098	-1411.88
TCGA-D1-A174-01A-11R-A12I-07	-9.1866	1682.98	1673.79
TCGA-BS-A0TE-01A-11R-A104-07	-1053.37	248.922	-804.45
TCGA-AX-A3FV-01A-11R-A22K-07	-1689.97	-342.326	-2032.3
TCGA-BG-A0RY-01A-11R-A104-07	-951.979	460.767	-491.212
TCGA-AX-A06D-01A-11R-A118-07	-1721.31	-151.797	-1873.1
TCGA-AX-A2H4-01A-21R-A18M-07	-80.2747	2190.58	2110.3
TCGA-AX-A05S-01A-11R-A00V-07	-443.925	737.19	293.265
TCGA-B5-A11F-01A-11R-A10J-07	-768.568	-305.735	-1074.3
TCGA-D1-A16J-01A-11R-A12I-07	-727.653	1128.67	401.017
TCGA-D1-A16N-01A-11R-A12I-07	-633.239	249.469	-383.771
TCGA-B5-A11R-01A-11R-A118-07	-1163.8	119.386	-1044.41
TCGA-5B-A90C-01A-11R-A37O-07	-1055.15	-567.274	-1622.42
TCGA-AP-A0LS-01A-11R-A14D-07	-923.665	-89.6247	-1013.29
TCGA-B5-A0JZ-01A-11R-A040-07	-261.608	1723.71	1462.1
TCGA-KP-A3VZ-01A-11R-A22K-07	-1617.58	-973.568	-2591.15
TCGA-FI-A2EW-01A-11R-A17B-07	-1265.54	-128.729	-1394.27
TCGA-AJ-A8CW-01A-11R-A37O-07	-821.405	170.735	-650.67
TCGA-D1-A16Q-01A-12R-A12I-07	-317.799	880.902	563.103
TCGA-B5-A0JR-01A-13R-A466-07	-641.327	525.781	-115.546
TCGA-AX-A05Y-01A-11R-A00V-07	-1409.86	-471.131	-1880.99
TCGA-KJ-A3U4-01A-11R-A22K-07	-1167.04	715.447	-451.594
TCGA-D1-A16E-01A-22R-A12I-07	-673.212	608.905	-64.3069
TCGA-D1-A2G6-01A-11R-A17B-07	-79.5752	38.5184	-41.0568
TCGA-B5-A11I-01A-11R-A10J-07	-617.923	1503.48	885.556
TCGA-AX-A063-01A-11R-A00V-07	-300.016	1603.24	1303.23
TCGA-FI-A2D2-01A-11R-A17B-07	-659.625	-46.308	-705.933
TCGA-AP-A05P-01A-11R-A16W-07	-486.413	249.191	-237.221
TCGA-D1-A16G-01A-31R-A12I-07	-1621.13	231.07	-1390.06
TCGA-BG-A0MQ-01A-11R-A104-07	-1307.78	-504.993	-1812.77
TCGA-AJ-A3NH-01A-11R-A22K-07	-1058.23	-914.403	-1972.63
TCGA-B5-A1MY-01A-11R-A144-07	-274.066	-303.366	-577.431
TCGA-DF-A2KS-01A-11R-A18M-07	-1121.19	697.008	-424.178
TCGA-B5-A0K3-01A-11R-A040-07	-1367.19	128.072	-1239.12
TCGA-AP-A0LO-01A-11R-A040-07	-875.7	-124.221	-999.921
TCGA-BK-A0CA-01A-21R-A118-07	-1169.97	127.653	-1042.31
TCGA-D1-A0ZQ-01A-11R-A118-07	74.1886	-94.194	-20.0054
TCGA-BS-A0U9-01B-21R-A10J-07	-1510.01	-424.369	-1934.38
TCGA-BS-A0UA-01A-11R-A118-07	-29.4307	1209.46	1180.03
TCGA-QS-A8F1-01A-21R-A37O-07	-728.138	-88.3506	-816.489
TCGA-B5-A1MV-01A-31R-A14D-07	-765.995	250.932	-515.062
