# Supplementary material for: Identification of prognostic immune-related genes in the tumor microenvironment of endometrial cancer
Source: Aging (Albany NY). 2020 Feb 19;12(4):3371–87. doi: 10.18632/aging.102817 (PMC7066904; doi:10.18632/aging.102817)
Supplement: Supplementary Table 2 [file aging-12-102817-s001..xlsx]

## Sheet: TCGA-CDR_UCEC
Supplementary Table 2. The clinical data of EC extracted from TCGA-CDR.
bcr_patient_barcode	age_at_initial_pathologic_diagnosis	race	clinical_stage	histological_type	histological_grade	OS	OS.time	DSS	DSS.time	DFI	DFI.time	PFI	PFI.time
TCGA-2E-A9G8	59	BLACK OR AFRICAN AMERICAN	Stage III	Endometrioid endometrial adenocarcinoma	G2	0	1249	0	1249	#N/A	#N/A	1	335
TCGA-4E-A92E	54	BLACK OR AFRICAN AMERICAN	Stage I	Endometrioid endometrial adenocarcinoma	G1	0	13	0	13	0	13	0	13
TCGA-5B-A90C	69	BLACK OR AFRICAN AMERICAN	Stage IA	Endometrioid endometrial adenocarcinoma	G2	0	1202	0	1202	#N/A	#N/A	1	517
TCGA-5S-A9Q8	51	BLACK OR AFRICAN AMERICAN	Stage IIIA	Endometrioid endometrial adenocarcinoma	G2	0	313	0	313	0	313	0	313
TCGA-A5-A0G1	67	WHITE	Stage IA	Serous endometrial adenocarcinoma	G3	1	3251	0	3251	0	3251	0	3251
TCGA-A5-A0G2	57	ASIAN	Stage IIIB	Serous endometrial adenocarcinoma	G3	0	4549	0	4549	0	4549	0	4549
TCGA-A5-A0G3	61	BLACK OR AFRICAN AMERICAN	Stage IIIC2	Serous endometrial adenocarcinoma	G3	0	1428	0	1428	1	795	1	795
TCGA-A5-A0G5	73	BLACK OR AFRICAN AMERICAN	Stage IB	Serous endometrial adenocarcinoma	G3	0	1126	0	1126	0	1126	0	1126
TCGA-A5-A0G9	79	WHITE	Stage IB	Endometrioid endometrial adenocarcinoma	G3	0	2540	0	2540	0	2540	0	2540
TCGA-A5-A0GA	67	WHITE	Stage IIIC2	Endometrioid endometrial adenocarcinoma	G3	1	543	1	543	#N/A	#N/A	1	543
TCGA-A5-A0GB	65	WHITE	Stage IB	Endometrioid endometrial adenocarcinoma	G3	0	997	0	997	0	997	0	997
TCGA-A5-A0GD	75	WHITE	Stage IA	Endometrioid endometrial adenocarcinoma	G2	1	3423	0	3423	0	3423	0	3423
TCGA-A5-A0GE	38	ASIAN	Stage IA	Endometrioid endometrial adenocarcinoma	G2	0	3205	0	3205	0	3205	0	3205
TCGA-A5-A0GG	76	BLACK OR AFRICAN AMERICAN	Stage IA	Endometrioid endometrial adenocarcinoma	G1	0	3762	0	3762	0	3762	0	3762
TCGA-A5-A0GH	57	WHITE	Stage IA	Endometrioid endometrial adenocarcinoma	G3	0	2254	0	2254	0	2254	0	2254
TCGA-A5-A0GI	63	WHITE	Stage IA	Endometrioid endometrial adenocarcinoma	G2	0	2682	0	2682	0	2682	0	2682
TCGA-A5-A0GJ	44	WHITE	Stage IA	Endometrioid endometrial adenocarcinoma	G2	0	2000	0	2000	1	12	1	12
TCGA-A5-A0GM	53	WHITE	Stage IA	Endometrioid endometrial adenocarcinoma	G1	0	1841	0	1841	0	1841	0	1841
TCGA-A5-A0GN	65	WHITE	Stage IB	Endometrioid endometrial adenocarcinoma	G1	0	1841	0	1841	0	1841	0	1841
TCGA-A5-A0GP	58	ASIAN	Stage IA	Endometrioid endometrial adenocarcinoma	G1	0	1416	0	1416	0	1416	0	1416
TCGA-A5-A0GQ	76	WHITE	Stage IB	Endometrioid endometrial adenocarcinoma	G1	0	2247	0	2247	0	2247	0	2247
TCGA-A5-A0GR	69	BLACK OR AFRICAN AMERICAN	Stage IA	Endometrioid endometrial adenocarcinoma	G2	0	1120	0	1120	0	1120	0	1120
TCGA-A5-A0GU	58	WHITE	Stage IA	Endometrioid endometrial adenocarcinoma	G1	0	860	0	860	0	860	0	860
TCGA-A5-A0GV	67	WHITE	Stage IA	Endometrioid endometrial adenocarcinoma	G1	0	1643	0	1643	1	304	1	304
TCGA-A5-A0GW	46	ASIAN	Stage IA	Endometrioid endometrial adenocarcinoma	G3	0	706	0	706	0	706	0	706
TCGA-A5-A0GX	53	WHITE	Stage IA	Endometrioid endometrial adenocarcinoma	G2	0	2088	0	2088	0	2088	0	2088
TCGA-A5-A0R6	64	WHITE	Stage IIIC1	Serous endometrial adenocarcinoma	G3	0	1153	0	1153	0	1153	1	961
TCGA-A5-A0R7	55	WHITE	Stage IA	Endometrioid endometrial adenocarcinoma	G2	0	535	0	535	0	535	0	535
TCGA-A5-A0R8	81	WHITE	Stage IB	Endometrioid endometrial adenocarcinoma	G2	0	596	0	596	1	42	1	42
TCGA-A5-A0R9	51	WHITE	Stage IA	Endometrioid endometrial adenocarcinoma	G2	0	749	0	749	0	749	0	749
TCGA-A5-A0RA	68	WHITE	Stage IB	Endometrioid endometrial adenocarcinoma	G2	0	884	0	884	0	884	0	884
TCGA-A5-A0VO	64	WHITE	Stage IB	Endometrioid endometrial adenocarcinoma	G2	1	875	0	875	0	875	0	875
TCGA-A5-A0VP	74	WHITE	Stage IA	Endometrioid endometrial adenocarcinoma	G3	0	1288	0	1288	0	1288	0	1288
TCGA-A5-A0VQ	62	[Not Available]	Stage IA	Endometrioid endometrial adenocarcinoma	G3	0	485	0	485	0	485	0	485
TCGA-A5-A1OF	47	[Not Available]	Stage IA	Mixed serous and endometrioid	High Grade	0	973	0	973	0	973	0	973
TCGA-A5-A1OG	65	ASIAN	Stage IIIC2	Serous endometrial adenocarcinoma	G3	1	973	1	973	1	337	1	337
TCGA-A5-A1OH	86	WHITE	Stage IIIA	Serous endometrial adenocarcinoma	G3	0	1105	0	1105	0	1105	0	1105
TCGA-A5-A1OJ	31	ASIAN	Stage IA	Endometrioid endometrial adenocarcinoma	G2	0	1006	0	1006	0	1006	0	1006
TCGA-A5-A1OK	63	WHITE	Stage IIIA	Endometrioid endometrial adenocarcinoma	G3	0	917	0	917	0	917	0	917
TCGA-A5-A2K2	77	WHITE	Stage IA	Serous endometrial adenocarcinoma	G3	0	3595	0	3595	0	3595	0	3595
TCGA-A5-A2K3	68	WHITE	Stage IA	Serous endometrial adenocarcinoma	G3	0	2012	0	2012	0	2012	0	2012
TCGA-A5-A2K4	69	WHITE	Stage IIIA	Serous endometrial adenocarcinoma	G3	1	871	1	871	1	528	1	528
TCGA-A5-A2K5	76	WHITE	Stage IA	Endometrioid endometrial adenocarcinoma	G3	0	752	0	752	0	752	0	752
TCGA-A5-A2K7	41	[Not Available]	Stage II	Endometrioid endometrial adenocarcinoma	G3	0	1063	0	1063	0	1063	0	1063
TCGA-A5-A3LO	64	WHITE	Stage IB	Endometrioid endometrial adenocarcinoma	G3	0	776	0	776	0	776	0	776
TCGA-A5-A3LP	74	WHITE	Stage IB	Serous endometrial adenocarcinoma	G3	0	455	0	455	0	455	0	455
TCGA-A5-A7WJ	64	BLACK OR AFRICAN AMERICAN	Stage IA	Endometrioid endometrial adenocarcinoma	G2	0	341	0	341	0	341	0	341
TCGA-A5-A7WK	71	BLACK OR AFRICAN AMERICAN	Stage IA	Mixed serous and endometrioid	G3	0	560	0	560	1	350	1	350
TCGA-A5-AB3J	52	BLACK OR AFRICAN AMERICAN	Stage II	Endometrioid endometrial adenocarcinoma	G2	0	512	0	512	0	512	0	512
TCGA-AJ-A23M	61	WHITE	Stage II	Serous endometrial adenocarcinoma	G3	1	616	1	616	#N/A	#N/A	1	516
TCGA-AJ-A23N	70	WHITE	Stage IIIA	Serous endometrial adenocarcinoma	G3	1	439	1	439	#N/A	#N/A	1	439
TCGA-AJ-A23O	69	WHITE	Stage IB	Endometrioid endometrial adenocarcinoma	G3	1	312	0	312	#N/A	#N/A	0	312
TCGA-AJ-A2QK	65	WHITE	Stage IA	Endometrioid endometrial adenocarcinoma	G3	0	643	0	643	1	606	1	606
TCGA-AJ-A2QL	60	WHITE	Stage IIIC1	Endometrioid endometrial adenocarcinoma	G3	0	602	0	602	0	602	0	602
TCGA-AJ-A2QM	67	WHITE	Stage II	Serous endometrial adenocarcinoma	G3	0	894	0	894	0	894	0	894
TCGA-AJ-A2QN	60	WHITE	Stage II	Endometrioid endometrial adenocarcinoma	G3	0	1069	0	1069	0	1069	0	1069
TCGA-AJ-A2QO	85	WHITE	Stage IB	Endometrioid endometrial adenocarcinoma	G3	1	1045	0	1045	0	1045	0	1045
TCGA-AJ-A3BD	57	WHITE	Stage IIIC2	Serous endometrial adenocarcinoma	G3	0	1039	0	1039	0	1039	0	1039
TCGA-AJ-A3BF	65	WHITE	Stage IIIC2	Serous endometrial adenocarcinoma	G3	0	551	0	551	1	384	1	384
TCGA-AJ-A3BG	65	WHITE	Stage IA	Mixed serous and endometrioid	G3	0	550	0	550	1	480	1	480
TCGA-AJ-A3BH	#N/A	WHITE	Stage IB	Endometrioid endometrial adenocarcinoma	G3	0	#N/A	0	#N/A	#N/A	#N/A	0	#N/A
TCGA-AJ-A3BI	67	WHITE	Stage IA	Endometrioid endometrial adenocarcinoma	G3	0	575	0	575	#N/A	#N/A	1	373
TCGA-AJ-A3BK	68	WHITE	Stage IC	Endometrioid endometrial adenocarcinoma	G3	0	1031	0	1031	0	1031	0	1031
TCGA-AJ-A3EJ	74	WHITE	Stage IIIC2	Mixed serous and endometrioid	G3	1	50	1	50	#N/A	#N/A	1	50
TCGA-AJ-A3EK	53	WHITE	Stage IA	Endometrioid endometrial adenocarcinoma	G3	0	446	0	446	0	446	0	446
TCGA-AJ-A3EL	47	NATIVE HAWAIIAN OR OTHER PACIFIC ISLANDER	Stage IA	Endometrioid endometrial adenocarcinoma	G3	0	684	0	684	0	684	0	684
TCGA-AJ-A3EM	69	WHITE	Stage IB	Endometrioid endometrial adenocarcinoma	G3	0	677	0	677	0	677	0	677
TCGA-AJ-A3I9	52	WHITE	Stage II	Endometrioid endometrial adenocarcinoma	G3	1	519	1	519	1	370	1	370
TCGA-AJ-A3IA	77	WHITE	Stage IB	Serous endometrial adenocarcinoma	G3	0	633	0	633	0	633	0	633
TCGA-AJ-A3NC	63	WHITE	Stage IA	Endometrioid endometrial adenocarcinoma	G3	0	1125	0	1125	0	1125	0	1125
TCGA-AJ-A3NE	46	WHITE	Stage IA	Endometrioid endometrial adenocarcinoma	G3	0	628	0	628	0	628	0	628
TCGA-AJ-A3NF	60	WHITE	Stage IIIC	Serous endometrial adenocarcinoma	G3	0	645	0	645	0	645	0	645
TCGA-AJ-A3NG	83	WHITE	Stage II	Mixed serous and endometrioid	G3	0	475	0	475	0	475	0	475
TCGA-AJ-A3NH	90	WHITE	Stage IB	Serous endometrial adenocarcinoma	G3	1	310	0	310	0	310	0	310
TCGA-AJ-A3OJ	54	WHITE	Stage II	Endometrioid endometrial adenocarcinoma	G3	0	467	0	467	0	467	0	467
TCGA-AJ-A3OK	73	WHITE	Stage IA	Serous endometrial adenocarcinoma	G3	0	485	0	485	0	485	0	485
TCGA-AJ-A3OL	55	WHITE	Stage IIIA	Endometrioid endometrial adenocarcinoma	G3	1	449	1	449	1	424	1	424
TCGA-AJ-A3QS	57	BLACK OR AFRICAN AMERICAN	Stage IIIA	Serous endometrial adenocarcinoma	G3	0	513	0	513	0	513	0	513
TCGA-AJ-A3TW	78	WHITE	Stage IB	Serous endometrial adenocarcinoma	G3	0	513	0	513	0	513	0	513
TCGA-AJ-A4ZG	53	BLACK OR AFRICAN AMERICAN	Stage IVB	Serous endometrial adenocarcinoma	G3	0	498	0	498	#N/A	#N/A	0	498
TCGA-AJ-A5DV	65	BLACK OR AFRICAN AMERICAN	Stage IA	Endometrioid endometrial adenocarcinoma	G3	0	679	0	679	0	679	0	679
TCGA-AJ-A5DW	56	BLACK OR AFRICAN AMERICAN	Stage IA	Endometrioid endometrial adenocarcinoma	G2	0	390	0	390	0	390	0	390
TCGA-AJ-A6NU	64	BLACK OR AFRICAN AMERICAN	Stage II	Endometrioid endometrial adenocarcinoma	G1	0	632	0	632	0	632	0	632
TCGA-AJ-A8CT	58	BLACK OR AFRICAN AMERICAN	Stage IA	Endometrioid endometrial adenocarcinoma	G1	0	82	0	82	0	82	0	82
TCGA-AJ-A8CV	58	BLACK OR AFRICAN AMERICAN	Stage IB	Endometrioid endometrial adenocarcinoma	G2	0	1068	0	1068	0	1068	0	1068
TCGA-AJ-A8CW	64	BLACK OR AFRICAN AMERICAN	Stage IA	Endometrioid endometrial adenocarcinoma	G2	0	4	0	4	#N/A	#N/A	0	4
TCGA-AP-A051	69	WHITE	Stage IA	Endometrioid endometrial adenocarcinoma	G3	0	3948	0	3948	0	3948	0	3948
TCGA-AP-A052	59	BLACK OR AFRICAN AMERICAN	Stage IVB	Serous endometrial adenocarcinoma	G3	1	669	1	669	#N/A	#N/A	1	394
TCGA-AP-A053	90	WHITE	Stage IA	Endometrioid endometrial adenocarcinoma	G3	1	3365	0	3365	0	3365	0	3365
TCGA-AP-A054	64	WHITE	Stage IIIC1	Endometrioid endometrial adenocarcinoma	G3	1	709	1	709	1	566	1	566
TCGA-AP-A056	64	WHITE	Stage II	Endometrioid endometrial adenocarcinoma	G3	0	2618	0	2618	0	2618	0	2618
TCGA-AP-A059	69	WHITE	Stage IA	Endometrioid endometrial adenocarcinoma	G3	0	1461	0	1461	0	1461	0	1461
TCGA-AP-A05A	81	WHITE	Stage II	Serous endometrial adenocarcinoma	G3	1	1944	0	1944	0	1944	0	1944
TCGA-AP-A05D	67	WHITE	Stage IIIC2	Serous endometrial adenocarcinoma	G3	0	1758	0	1758	0	1758	0	1758
TCGA-AP-A05H	75	WHITE	Stage IB	Serous endometrial adenocarcinoma	G3	0	1385	0	1385	0	1385	0	1385
TCGA-AP-A05J	66	WHITE	Stage II	Serous endometrial adenocarcinoma	G3	0	1122	0	1122	0	1122	0	1122
TCGA-AP-A05N	58	WHITE	Stage IA	Endometrioid endometrial adenocarcinoma	G1	1	726	0	726	0	726	0	726
TCGA-AP-A05O	68	WHITE	Stage IB	Endometrioid endometrial adenocarcinoma	G3	0	384	0	384	1	340	1	340
TCGA-AP-A05P	54	ASIAN	Stage IA	Endometrioid endometrial adenocarcinoma	G1	0	636	0	636	0	636	0	636
TCGA-AP-A0L8	70	BLACK OR AFRICAN AMERICAN	Stage IIIC2	Serous endometrial adenocarcinoma	G3	1	1484	1	1484	1	1453	1	1453
TCGA-AP-A0L9	71	WHITE	Stage IA	Serous endometrial adenocarcinoma	G3	0	3815	0	3815	0	3815	0	3815
TCGA-AP-A0LD	63	WHITE	Stage IB	Endometrioid endometrial adenocarcinoma	G3	0	3589	0	3589	0	3589	0	3589
TCGA-AP-A0LE	57	WHITE	Stage IA	Endometrioid endometrial adenocarcinoma	G3	0	3357	0	3357	0	3357	0	3357
TCGA-AP-A0LF	82	WHITE	Stage IVB	Endometrioid endometrial adenocarcinoma	G3	0	2859	0	2859	#N/A	#N/A	0	2859
TCGA-AP-A0LG	54	WHITE	Stage IA	Endometrioid endometrial adenocarcinoma	G3	0	2015	0	2015	0	2015	0	2015
TCGA-AP-A0LH	60	WHITE	Stage IA	Mixed serous and endometrioid	G3	1	1106	1	1106	1	302	1	302
TCGA-AP-A0LI	67	BLACK OR AFRICAN AMERICAN	Stage IIIC2	Serous endometrial adenocarcinoma	G3	0	2972	0	2972	0	2972	0	2972
TCGA-AP-A0LJ	42	WHITE	Stage IA	Endometrioid endometrial adenocarcinoma	G1	0	1421	0	1421	0	1421	0	1421
TCGA-AP-A0LL	56	WHITE	Stage IA	Endometrioid endometrial adenocarcinoma	G1	0	2554	0	2554	1	790	1	790
TCGA-AP-A0LM	33	BLACK OR AFRICAN AMERICAN	Stage IIIC2	Endometrioid endometrial adenocarcinoma	G3	0	825	0	825	0	825	0	825
TCGA-AP-A0LN	56	BLACK OR AFRICAN AMERICAN	Stage IA	Endometrioid endometrial adenocarcinoma	G1	0	2510	0	2510	0	2510	0	2510
TCGA-AP-A0LO	45	WHITE	Stage IA	Endometrioid endometrial adenocarcinoma	G2	1	1016	1	1016	1	516	1	516
TCGA-AP-A0LP	76	WHITE	Stage IA	Endometrioid endometrial adenocarcinoma	G1	0	1875	0	1875	0	1875	0	1875
TCGA-AP-A0LQ	59	WHITE	Stage IA	Endometrioid endometrial adenocarcinoma	G2	0	2457	0	2457	0	2457	0	2457
TCGA-AP-A0LS	63	WHITE	Stage IA	Endometrioid endometrial adenocarcinoma	G2	0	2904	0	2904	0	2904	0	2904
TCGA-AP-A0LT	57	WHITE	Stage II	Endometrioid endometrial adenocarcinoma	G2	0	1497	0	1497	0	1497	0	1497
TCGA-AP-A0LV	39	WHITE	Stage IA	Endometrioid endometrial adenocarcinoma	G1	0	763	0	763	0	763	0	763
TCGA-AP-A1DH	62	WHITE	Stage IA	Endometrioid endometrial adenocarcinoma	G3	0	2180	0	2180	0	2180	0	2180
TCGA-AP-A1DK	53	WHITE	Stage IA	Endometrioid endometrial adenocarcinoma	G3	0	2767	0	2767	0	2767	0	2767
TCGA-AP-A1DM	60	WHITE	Stage IA	Endometrioid endometrial adenocarcinoma	G1	0	1700	0	1700	0	1700	0	1700
TCGA-AP-A1DO	62	WHITE	Stage IA	Endometrioid endometrial adenocarcinoma	G2	0	952	0	952	0	952	0	952
TCGA-AP-A1DP	70	WHITE	Stage IA	Endometrioid endometrial adenocarcinoma	G2	1	1081	1	1081	1	831	1	831
TCGA-AP-A1DQ	76	WHITE	Stage IIIC1	Serous endometrial adenocarcinoma	High Grade	1	1423	1	1423	1	905	1	905
TCGA-AP-A1DR	59	BLACK OR AFRICAN AMERICAN	Stage IIIC1	Endometrioid endometrial adenocarcinoma	G2	0	1495	0	1495	0	1495	0	1495
TCGA-AP-A1DV	59	WHITE	Stage II	Endometrioid endometrial adenocarcinoma	G3	0	204	0	204	0	204	0	204
TCGA-AP-A1E0	40	WHITE	Stage IIIC2	Endometrioid endometrial adenocarcinoma	G2	0	1832	0	1832	0	1832	0	1832
TCGA-AP-A1E1	74	WHITE	Stage IA	Endometrioid endometrial adenocarcinoma	G2	0	1395	0	1395	0	1395	0	1395
TCGA-AP-A1E3	45	WHITE	Stage IIIC1	Endometrioid endometrial adenocarcinoma	G3	0	847	0	847	#N/A	#N/A	0	847
TCGA-AP-A1E4	54	WHITE	Stage IB	Endometrioid endometrial adenocarcinoma	G2	0	1555	0	1555	#N/A	#N/A	1	158
TCGA-AP-A3K1	56	WHITE	Stage IVB	Serous endometrial adenocarcinoma	High Grade	1	666	1	666	#N/A	#N/A	1	198
TCGA-AP-A5FX	68	BLACK OR AFRICAN AMERICAN	Stage IIIC1	Mixed serous and endometrioid	G3	1	1099	1	1099	1	407	1	407
TCGA-AW-A1PO	66	WHITE	Stage IIIA	Endometrioid endometrial adenocarcinoma	G3	0	17	0	17	#N/A	#N/A	0	17
TCGA-AX-A05S	81	WHITE	Stage IIIC	Endometrioid endometrial adenocarcinoma	G3	1	413	1	413	#N/A	#N/A	1	338
TCGA-AX-A05T	82	WHITE	Stage IB	Endometrioid endometrial adenocarcinoma	G1	0	1010	0	1010	0	1010	0	1010
TCGA-AX-A05U	56	AMERICAN INDIAN OR ALASKA NATIVE	Stage IB	Endometrioid endometrial adenocarcinoma	G1	0	903	0	903	0	903	0	903
TCGA-AX-A05W	60	WHITE	Stage IIB	Endometrioid endometrial adenocarcinoma	G1	0	2450	0	2450	0	2450	0	2450
TCGA-AX-A05Y	57	WHITE	Stage IB	Endometrioid endometrial adenocarcinoma	G1	0	2684	0	2684	1	194	1	194
TCGA-AX-A05Z	37	[Not Available]	Stage IIIA	Endometrioid endometrial adenocarcinoma	G2	0	2175	0	2175	0	2175	0	2175
TCGA-AX-A060	77	AMERICAN INDIAN OR ALASKA NATIVE	Stage IC	Endometrioid endometrial adenocarcinoma	G3	0	1075	0	1075	0	1075	0	1075
TCGA-AX-A062	53	WHITE	Stage IB	Endometrioid endometrial adenocarcinoma	G1	0	1399	0	1399	0	1399	0	1399
TCGA-AX-A063	63	WHITE	Stage IB	Endometrioid endometrial adenocarcinoma	G2	0	2417	0	2417	0	2417	0	2417
TCGA-AX-A064	81	WHITE	Stage IIA	Endometrioid endometrial adenocarcinoma	G2	0	1517	0	1517	0	1517	0	1517
TCGA-AX-A06B	72	WHITE	Stage IIA	Endometrioid endometrial adenocarcinoma	G3	0	2058	0	2058	0	2058	0	2058
TCGA-AX-A06D	82	WHITE	Stage IIIA	Endometrioid endometrial adenocarcinoma	G2	1	373	1	373	#N/A	#N/A	1	253
TCGA-AX-A06F	59	WHITE	Stage IVA	Endometrioid endometrial adenocarcinoma	G3	0	1748	0	1748	#N/A	#N/A	0	1748
TCGA-AX-A06H	60	AMERICAN INDIAN OR ALASKA NATIVE	Stage IIIA	Endometrioid endometrial adenocarcinoma	G1	0	833	0	833	0	833	0	833
TCGA-AX-A06J	71	WHITE	Stage IB	Endometrioid endometrial adenocarcinoma	G3	0	913	0	913	0	913	0	913
TCGA-AX-A06L	63	WHITE	Stage IB	Endometrioid endometrial adenocarcinoma	G1	0	1845	0	1845	0	1845	0	1845
TCGA-AX-A0IS	52	WHITE	Stage IC	Endometrioid endometrial adenocarcinoma	G2	1	1858	1	1858	1	448	1	448
TCGA-AX-A0IU	79	BLACK OR AFRICAN AMERICAN	Stage IIIC	Serous endometrial adenocarcinoma	G3	0	1087	0	1087	0	1087	0	1087
TCGA-AX-A0IW	67	WHITE	Stage IIIA	Serous endometrial adenocarcinoma	G3	0	1149	0	1149	0	1149	0	1149
TCGA-AX-A0IZ	53	WHITE	Stage IB	Endometrioid endometrial adenocarcinoma	G3	0	1333	0	1333	0	1333	0	1333
TCGA-AX-A0J0	47	WHITE	Stage IB	Endometrioid endometrial adenocarcinoma	G2	0	1220	0	1220	0	1220	0	1220
TCGA-AX-A0J1	80	WHITE	Stage IB	Endometrioid endometrial adenocarcinoma	G2	0	2354	0	2354	0	2354	0	2354
TCGA-AX-A1C4	52	WHITE	Stage IB	Endometrioid endometrial adenocarcinoma	G2	0	404	0	404	#N/A	#N/A	0	404
TCGA-AX-A1C5	47	WHITE	Stage IIIC	Endometrioid endometrial adenocarcinoma	G3	0	1001	0	1001	0	1001	0	1001
TCGA-AX-A1C7	77	WHITE	Stage IB	Serous endometrial adenocarcinoma	G3	0	1054	0	1054	#N/A	#N/A	1	390
TCGA-AX-A1C8	77	WHITE	Stage IIIC	Serous endometrial adenocarcinoma	G3	0	776	0	776	#N/A	#N/A	0	776
TCGA-AX-A1C9	73	WHITE	Stage IB	Endometrioid endometrial adenocarcinoma	G2	0	802	0	802	#N/A	#N/A	0	802
TCGA-AX-A1CA	70	BLACK OR AFRICAN AMERICAN	Stage IB	Serous endometrial adenocarcinoma	G3	0	974	0	974	#N/A	#N/A	0	974
TCGA-AX-A1CC	65	WHITE	Stage IC	Serous endometrial adenocarcinoma	G3	0	788	0	788	#N/A	#N/A	0	788
TCGA-AX-A1CE	60	WHITE	Stage IB	Endometrioid endometrial adenocarcinoma	G3	0	1037	0	1037	#N/A	#N/A	0	1037
TCGA-AX-A1CF	69	WHITE	Stage IVB	Endometrioid endometrial adenocarcinoma	G3	0	2337	0	2337	#N/A	#N/A	1	875
TCGA-AX-A1CI	61	WHITE	Stage IB	Endometrioid endometrial adenocarcinoma	G1	0	2600	0	2600	#N/A	#N/A	0	2600
TCGA-AX-A1CJ	59	BLACK OR AFRICAN AMERICAN	Stage IC	Endometrioid endometrial adenocarcinoma	G2	0	2233	0	2233	#N/A	#N/A	0	2233
TCGA-AX-A1CK	58	WHITE	Stage IB	Endometrioid endometrial adenocarcinoma	G2	0	2441	0	2441	#N/A	#N/A	0	2441
TCGA-AX-A1CN	54	WHITE	Stage IIB	Endometrioid endometrial adenocarcinoma	G3	0	1143	0	1143	#N/A	#N/A	1	1105
TCGA-AX-A1CP	84	WHITE	Stage IA	Serous endometrial adenocarcinoma	G3	0	1107	0	1107	#N/A	#N/A	1	722
TCGA-AX-A1CR	70	WHITE	Stage IIB	Mixed serous and endometrioid	G3	0	701	0	701	#N/A	#N/A	0	701
TCGA-AX-A2H2	86	BLACK OR AFRICAN AMERICAN	Stage IIA	Serous endometrial adenocarcinoma	G3	1	145	0	145	0	145	0	145
TCGA-AX-A2H4	66	WHITE	Stage IIIA	Serous endometrial adenocarcinoma	G3	1	916	1	916	1	520	1	520
TCGA-AX-A2H5	67	BLACK OR AFRICAN AMERICAN	Stage IIIC	Serous endometrial adenocarcinoma	G3	0	2167	0	2167	0	2167	0	2167
TCGA-AX-A2H7	87	WHITE	Stage IC	Endometrioid endometrial adenocarcinoma	G3	1	1241	1	1241	1	684	1	684
TCGA-AX-A2H8	64	WHITE	Stage IB	Endometrioid endometrial adenocarcinoma	G3	0	1861	0	1861	0	1861	0	1861
TCGA-AX-A2HA	35	WHITE	Stage IB	Endometrioid endometrial adenocarcinoma	G3	0	2475	0	2475	0	2475	0	2475
TCGA-AX-A2HC	53	BLACK OR AFRICAN AMERICAN	Stage IIIC	Endometrioid endometrial adenocarcinoma	G3	0	1044	0	1044	1	756	1	756
TCGA-AX-A2HD	69	WHITE	Stage IIIA	Endometrioid endometrial adenocarcinoma	G3	0	1414	0	1414	#N/A	#N/A	0	1414
TCGA-AX-A2HF	67	WHITE	Stage IB	Serous endometrial adenocarcinoma	G3	0	848	0	848	0	848	0	848
TCGA-AX-A2HG	56	WHITE	Stage IC	Endometrioid endometrial adenocarcinoma	G3	0	1163	0	1163	0	1163	0	1163
TCGA-AX-A2HH	60	WHITE	Stage IA	Endometrioid endometrial adenocarcinoma	G3	0	540	0	540	#N/A	#N/A	0	540
TCGA-AX-A2HJ	35	ASIAN	Stage IC	Endometrioid endometrial adenocarcinoma	G3	0	935	0	935	0	935	0	935
TCGA-AX-A2HK	77	WHITE	Stage IIIC	Endometrioid endometrial adenocarcinoma	G3	1	90	1	90	#N/A	#N/A	1	90
TCGA-AX-A2IN	63	WHITE	Stage IC	Endometrioid endometrial adenocarcinoma	G3	1	947	1	947	#N/A	#N/A	1	257
TCGA-AX-A2IO	83	WHITE	Stage IIA	Serous endometrial adenocarcinoma	G3	0	1975	0	1975	#N/A	#N/A	0	1975
TCGA-AX-A3FS	82	WHITE	Stage IA	Endometrioid endometrial adenocarcinoma	G3	0	7	0	7	#N/A	#N/A	0	7
TCGA-AX-A3FT	64	WHITE	Stage IB	Endometrioid endometrial adenocarcinoma	G3	0	6	0	6	#N/A	#N/A	0	6
TCGA-AX-A3FV	62	WHITE	Stage IIIA	Endometrioid endometrial adenocarcinoma	G3	0	0	0	0	#N/A	#N/A	0	0
TCGA-AX-A3FW	66	WHITE	Stage IB	Endometrioid endometrial adenocarcinoma	G3	0	17	0	17	#N/A	#N/A	0	17
TCGA-AX-A3FX	69	WHITE	Stage IIB	Endometrioid endometrial adenocarcinoma	G3	1	1333	#N/A	1333	#N/A	#N/A	1	938
TCGA-AX-A3FZ	33	WHITE	Stage IIIB	Endometrioid endometrial adenocarcinoma	G3	0	6	0	6	#N/A	#N/A	0	6
TCGA-AX-A3G1	84	WHITE	Stage IC	Endometrioid endometrial adenocarcinoma	G3	1	624	#N/A	624	#N/A	#N/A	0	624
TCGA-AX-A3G3	58	WHITE	Stage IIIA	Serous endometrial adenocarcinoma	G3	0	42	0	42	#N/A	#N/A	0	42
TCGA-AX-A3G4	60	NATIVE HAWAIIAN OR OTHER PACIFIC ISLANDER	Stage IIIC	Serous endometrial adenocarcinoma	G3	0	9	0	9	#N/A	#N/A	0	9
TCGA-AX-A3G6	67	WHITE	Stage IA	Serous endometrial adenocarcinoma	G2	0	8	0	8	#N/A	#N/A	0	8
TCGA-AX-A3G7	71	WHITE	Stage IVB	Serous endometrial adenocarcinoma	G3	0	9	0	9	#N/A	#N/A	0	9
TCGA-AX-A3G8	76	WHITE	Stage IA	Endometrioid endometrial adenocarcinoma	G3	0	36	0	36	#N/A	#N/A	0	36
TCGA-AX-A3G9	63	WHITE	Stage IIIC	Endometrioid endometrial adenocarcinoma	G3	0	558	0	558	#N/A	#N/A	0	558
TCGA-AX-A3GB	73	WHITE	Stage IB	Endometrioid endometrial adenocarcinoma	G3	0	440	0	440	#N/A	#N/A	0	440
TCGA-AX-A3GI	66	BLACK OR AFRICAN AMERICAN	Stage IIIC	Serous endometrial adenocarcinoma	G3	0	12	0	12	#N/A	#N/A	0	12
TCGA-B5-A0JN	84	BLACK OR AFRICAN AMERICAN	Stage IVB	Serous endometrial adenocarcinoma	G3	0	2445	0	2445	#N/A	#N/A	0	2445
TCGA-B5-A0JR	73	WHITE	Stage IB	Endometrioid endometrial adenocarcinoma	G3	0	1731	0	1731	0	1731	0	1731
TCGA-B5-A0JS	54	WHITE	Stage IA	Endometrioid endometrial adenocarcinoma	G1	0	2627	0	2627	0	2627	0	2627
TCGA-B5-A0JT	63	WHITE	Stage IIIA	Endometrioid endometrial adenocarcinoma	G1	0	1682	0	1682	0	1682	0	1682
TCGA-B5-A0JU	57	BLACK OR AFRICAN AMERICAN	Stage IB	Endometrioid endometrial adenocarcinoma	G2	0	1802	0	1802	#N/A	#N/A	0	1802
TCGA-B5-A0JV	63	BLACK OR AFRICAN AMERICAN	Stage IA	Endometrioid endometrial adenocarcinoma	G2	0	2616	0	2616	1	698	1	698
TCGA-B5-A0JX	62	WHITE	Stage IB	Endometrioid endometrial adenocarcinoma	G3	0	1787	0	1787	0	1787	0	1787
TCGA-B5-A0JY	50	WHITE	Stage IIIC1	Endometrioid endometrial adenocarcinoma	G3	0	2107	0	2107	0	2107	0	2107
TCGA-B5-A0JZ	60	WHITE	Stage IIIC1	Endometrioid endometrial adenocarcinoma	G3	0	2173	0	2173	#N/A	#N/A	1	356
TCGA-B5-A0K0	48	WHITE	Stage IA	Endometrioid endometrial adenocarcinoma	G1	0	1478	0	1478	0	1478	0	1478
TCGA-B5-A0K1	69	WHITE	Stage IA	Endometrioid endometrial adenocarcinoma	G1	0	1110	0	1110	0	1110	0	1110
TCGA-B5-A0K2	54	WHITE	Stage IIIA	Endometrioid endometrial adenocarcinoma	G1	0	2209	0	2209	0	2209	0	2209
TCGA-B5-A0K3	62	BLACK OR AFRICAN AMERICAN	Stage IA	Endometrioid endometrial adenocarcinoma	G3	1	830	1	830	#N/A	#N/A	1	256
TCGA-B5-A0K4	51	[Not Available]	Stage IB	Endometrioid endometrial adenocarcinoma	G2	0	1757	0	1757	0	1757	0	1757
TCGA-B5-A0K6	58	WHITE	Stage IA	Endometrioid endometrial adenocarcinoma	G1	0	1953	0	1953	0	1953	0	1953
TCGA-B5-A0K7	64	WHITE	Stage IA	Endometrioid endometrial adenocarcinoma	G1	0	1933	0	1933	1	322	1	322
TCGA-B5-A0K8	71	WHITE	Stage IB	Serous endometrial adenocarcinoma	G3	0	847	0	847	0	847	0	847
TCGA-B5-A0K9	88	WHITE	Stage II	Endometrioid endometrial adenocarcinoma	G1	1	409	0	409	0	409	0	409
TCGA-B5-A0KB	62	BLACK OR AFRICAN AMERICAN	Stage IB	Endometrioid endometrial adenocarcinoma	G3	0	824	0	824	1	689	1	689
TCGA-B5-A11E	53	WHITE	Stage IB	Endometrioid endometrial adenocarcinoma	G3	0	1820	0	1820	0	1820	0	1820
TCGA-B5-A11F	55	WHITE	Stage IA	Endometrioid endometrial adenocarcinoma	G2	0	5651	0	5651	1	1610	1	1610
TCGA-B5-A11G	71	BLACK OR AFRICAN AMERICAN	Stage IA	Endometrioid endometrial adenocarcinoma	G1	0	3448	0	3448	0	3448	0	3448
TCGA-B5-A11H	67	WHITE	Stage IIIA	Endometrioid endometrial adenocarcinoma	G2	0	2687	0	2687	0	2687	0	2687
TCGA-B5-A11I	65	BLACK OR AFRICAN AMERICAN	Stage IVB	Endometrioid endometrial adenocarcinoma	G3	0	2303	0	2303	#N/A	#N/A	1	705
TCGA-B5-A11J	64	WHITE	Stage IA	Endometrioid endometrial adenocarcinoma	G2	0	1656	0	1656	0	1656	0	1656
TCGA-B5-A11L	71	WHITE	Stage IC	Endometrioid endometrial adenocarcinoma	G2	1	2240	0	2240	1	131	1	131
TCGA-B5-A11M	43	WHITE	Stage IA	Endometrioid endometrial adenocarcinoma	G1	0	1362	0	1362	0	1362	0	1362
TCGA-B5-A11N	69	WHITE	Stage IA	Endometrioid endometrial adenocarcinoma	G1	0	1876	0	1876	0	1876	0	1876
TCGA-B5-A11O	62	WHITE	Stage IA	Endometrioid endometrial adenocarcinoma	G1	0	2609	0	2609	0	2609	1	1924
TCGA-B5-A11P	87	WHITE	Stage IB	Endometrioid endometrial adenocarcinoma	G3	0	1583	0	1583	#N/A	#N/A	0	1583
TCGA-B5-A11Q	64	WHITE	Stage IIIA	Endometrioid endometrial adenocarcinoma	G1	0	976	0	976	0	976	0	976
TCGA-B5-A11R	51	BLACK OR AFRICAN AMERICAN	Stage II	Endometrioid endometrial adenocarcinoma	G3	0	2349	0	2349	0	2349	0	2349
TCGA-B5-A11S	63	WHITE	Stage IA	Endometrioid endometrial adenocarcinoma	G2	0	2229	0	2229	0	2229	1	41
TCGA-B5-A11U	74	BLACK OR AFRICAN AMERICAN	Stage IVB	Endometrioid endometrial adenocarcinoma	G3	0	509	0	509	#N/A	#N/A	0	509
TCGA-B5-A11V	64	BLACK OR AFRICAN AMERICAN	Stage IA	Endometrioid endometrial adenocarcinoma	G1	0	595	0	595	0	595	0	595
TCGA-B5-A11W	61	WHITE	Stage IB	Endometrioid endometrial adenocarcinoma	G2	0	593	0	593	0	593	0	593
TCGA-B5-A11X	66	BLACK OR AFRICAN AMERICAN	Stage IIIC2	Endometrioid endometrial adenocarcinoma	G3	0	596	0	596	#N/A	#N/A	1	397
TCGA-B5-A11Y	59	WHITE	Stage IB	Endometrioid endometrial adenocarcinoma	G1	0	560	0	560	0	560	0	560
TCGA-B5-A11Z	61	WHITE	Stage IA	Endometrioid endometrial adenocarcinoma	G1	0	528	0	528	0	528	0	528
TCGA-B5-A121	57	WHITE	Stage IIIA	Endometrioid endometrial adenocarcinoma	G1	0	504	0	504	0	504	0	504
TCGA-B5-A1MR	65	WHITE	Stage IIIA	Endometrioid endometrial adenocarcinoma	G3	0	6859	0	6859	0	6859	0	6859
TCGA-B5-A1MS	60	WHITE	Stage IC	Serous endometrial adenocarcinoma	G3	1	3112	1	3112	#N/A	#N/A	1	2706
TCGA-B5-A1MU	79	WHITE	Stage IVB	Serous endometrial adenocarcinoma	G3	1	1548	1	1548	#N/A	#N/A	1	1365
TCGA-B5-A1MV	84	WHITE	Stage IA	Endometrioid endometrial adenocarcinoma	G2	0	1565	0	1565	0	1565	0	1565
TCGA-B5-A1MW	55	WHITE	Stage IA	Endometrioid endometrial adenocarcinoma	G3	0	447	0	447	1	311	1	311
TCGA-B5-A1MX	47	WHITE	Stage IB	Endometrioid endometrial adenocarcinoma	G3	0	1473	0	1473	0	1473	0	1473
TCGA-B5-A1MY	62	BLACK OR AFRICAN AMERICAN	Stage IIIC2	Serous endometrial adenocarcinoma	G3	1	361	1	361	#N/A	#N/A	1	333
TCGA-B5-A1MZ	54	WHITE	Stage IA	Endometrioid endometrial adenocarcinoma	G1	0	1598	0	1598	1	613	1	613
TCGA-B5-A1N2	70	BLACK OR AFRICAN AMERICAN	Stage IIIC1	Serous endometrial adenocarcinoma	G3	1	954	1	954	1	804	1	804
TCGA-B5-A3F9	56	BLACK OR AFRICAN AMERICAN	Stage IB	Endometrioid endometrial adenocarcinoma	G3	0	4155	0	4155	#N/A	#N/A	0	4155
TCGA-B5-A3FA	73	WHITE	Stage IC	Endometrioid endometrial adenocarcinoma	G3	0	2929	0	2929	#N/A	#N/A	0	2929
TCGA-B5-A3FB	73	BLACK OR AFRICAN AMERICAN	Stage IB	Endometrioid endometrial adenocarcinoma	G3	0	2844	0	2844	#N/A	#N/A	0	2844
TCGA-B5-A3FC	53	BLACK OR AFRICAN AMERICAN	Stage II	Endometrioid endometrial adenocarcinoma	G3	0	2185	0	2185	#N/A	#N/A	0	2185
TCGA-B5-A3FD	70	BLACK OR AFRICAN AMERICAN	Stage IA	Endometrioid endometrial adenocarcinoma	G3	1	1197	0	1197	#N/A	#N/A	1	562
TCGA-B5-A3FH	74	BLACK OR AFRICAN AMERICAN	Stage IA	Endometrioid endometrial adenocarcinoma	G3	0	841	0	841	0	841	0	841
TCGA-B5-A3S1	71	WHITE	Stage IIIC1	Serous endometrial adenocarcinoma	G3	0	902	0	902	0	902	0	902
TCGA-B5-A5OC	71	BLACK OR AFRICAN AMERICAN	Stage IIIB	Endometrioid endometrial adenocarcinoma	G3	0	1249	0	1249	#N/A	#N/A	0	1249
TCGA-B5-A5OD	67	BLACK OR AFRICAN AMERICAN	Stage IIIC	Serous endometrial adenocarcinoma	G3	0	1038	0	1038	#N/A	#N/A	0	1038
TCGA-B5-A5OE	68	BLACK OR AFRICAN AMERICAN	Stage IIIC2	Serous endometrial adenocarcinoma	G3	0	1063	0	1063	#N/A	#N/A	0	1063
TCGA-BG-A0LW	47	WHITE	Stage IA	Endometrioid endometrial adenocarcinoma	G2	0	566	0	566	0	566	0	566
TCGA-BG-A0LX	57	WHITE	Stage IB	Endometrioid endometrial adenocarcinoma	G2	0	614	0	614	0	614	0	614
TCGA-BG-A0M0	66	WHITE	Stage IA	Endometrioid endometrial adenocarcinoma	G1	0	588	0	588	0	588	0	588
TCGA-BG-A0M2	62	WHITE	Stage IB	Endometrioid endometrial adenocarcinoma	G2	0	637	0	637	0	637	0	637
TCGA-BG-A0M3	74	WHITE	Stage IB	Endometrioid endometrial adenocarcinoma	G2	0	1071	0	1071	0	1071	0	1071
TCGA-BG-A0M4	60	WHITE	Stage IA	Endometrioid endometrial adenocarcinoma	G3	0	2167	0	2167	0	2167	0	2167
TCGA-BG-A0M6	73	WHITE	Stage IIIC2	Serous endometrial adenocarcinoma	G3	1	671	0	671	0	671	0	671
TCGA-BG-A0M7	60	WHITE	Stage IIIC1	Endometrioid endometrial adenocarcinoma	G2	0	1937	0	1937	0	1937	0	1937
TCGA-BG-A0M8	50	WHITE	Stage IA	Endometrioid endometrial adenocarcinoma	G3	0	2020	0	2020	0	2020	0	2020
TCGA-BG-A0M9	73	WHITE	Stage IB	Endometrioid endometrial adenocarcinoma	G2	0	2270	0	2270	0	2270	0	2270
TCGA-BG-A0MA	60	WHITE	Stage IB	Endometrioid endometrial adenocarcinoma	G3	1	326	1	326	#N/A	#N/A	1	70
TCGA-BG-A0MC	74	WHITE	Stage IA	Endometrioid endometrial adenocarcinoma	G1	0	1263	0	1263	0	1263	0	1263
TCGA-BG-A0MG	73	WHITE	Stage IA	Endometrioid endometrial adenocarcinoma	G1	0	1477	0	1477	0	1477	0	1477
TCGA-BG-A0MH	61	WHITE	Stage IC	Endometrioid endometrial adenocarcinoma	G2	0	1930	0	1930	0	1930	0	1930
TCGA-BG-A0MI	83	WHITE	Stage IA	Endometrioid endometrial adenocarcinoma	G2	1	714	0	714	#N/A	#N/A	0	714
TCGA-BG-A0MK	52	BLACK OR AFRICAN AMERICAN	Stage IIB	Endometrioid endometrial adenocarcinoma	G3	1	1317	1	1317	#N/A	#N/A	1	1317
TCGA-BG-A0MO	63	WHITE	Stage IA	Endometrioid endometrial adenocarcinoma	G1	0	1309	0	1309	0	1309	0	1309
TCGA-BG-A0MQ	71	WHITE	Stage IA	Endometrioid endometrial adenocarcinoma	G1	0	1817	0	1817	#N/A	#N/A	0	1817
TCGA-BG-A0MS	53	WHITE	Stage IIIC1	Endometrioid endometrial adenocarcinoma	G3	0	1882	0	1882	0	1882	0	1882
TCGA-BG-A0MT	64	WHITE	Stage IA	Endometrioid endometrial adenocarcinoma	G2	0	644	0	644	#N/A	#N/A	1	565
TCGA-BG-A0MU	78	WHITE	Stage IIIA	Endometrioid endometrial adenocarcinoma	G1	0	617	0	617	0	617	0	617
TCGA-BG-A0RY	68	WHITE	Stage IB	Endometrioid endometrial adenocarcinoma	G2	0	469	0	469	0	469	0	469
TCGA-BG-A0VT	56	WHITE	Stage IIIA	Endometrioid endometrial adenocarcinoma	G2	0	1568	0	1568	0	1568	0	1568
TCGA-BG-A0VV	53	WHITE	Stage IA	Endometrioid endometrial adenocarcinoma	G1	0	1553	0	1553	0	1553	0	1553
TCGA-BG-A0VW	77	WHITE	Stage IA	Endometrioid endometrial adenocarcinoma	G1	0	1582	0	1582	0	1582	0	1582
TCGA-BG-A0VX	58	WHITE	Stage IB	Endometrioid endometrial adenocarcinoma	G1	0	1043	0	1043	0	1043	0	1043
TCGA-BG-A0VZ	58	WHITE	Stage IIIA	Endometrioid endometrial adenocarcinoma	G1	0	1601	0	1601	0	1601	0	1601
TCGA-BG-A0W1	89	WHITE	Stage II	Endometrioid endometrial adenocarcinoma	G2	0	1607	0	1607	0	1607	0	1607
TCGA-BG-A0W2	57	WHITE	Stage IA	Endometrioid endometrial adenocarcinoma	G1	0	1721	0	1721	0	1721	0	1721
TCGA-BG-A0YU	37	WHITE	Stage IA	Endometrioid endometrial adenocarcinoma	G1	0	451	0	451	0	451	0	451
TCGA-BG-A0YV	67	WHITE	Stage IIIA	Serous endometrial adenocarcinoma	G3	0	382	0	382	0	382	0	382
TCGA-BG-A186	61	BLACK OR AFRICAN AMERICAN	Stage IIIA	Endometrioid endometrial adenocarcinoma	G2	0	419	0	419	0	419	0	419
TCGA-BG-A187	65	WHITE	Stage IB	Endometrioid endometrial adenocarcinoma	G2	0	448	0	448	0	448	0	448
TCGA-BG-A18A	74	WHITE	Stage IA	Endometrioid endometrial adenocarcinoma	G1	0	426	0	426	0	426	0	426
TCGA-BG-A18B	53	WHITE	Stage I	Endometrioid endometrial adenocarcinoma	G2	0	470	0	470	0	470	0	470
TCGA-BG-A18C	72	WHITE	Stage IA	Endometrioid endometrial adenocarcinoma	G2	0	470	0	470	0	470	0	470
TCGA-BG-A220	69	WHITE	Stage IA	Endometrioid endometrial adenocarcinoma	G3	0	434	0	434	0	434	0	434
TCGA-BG-A221	84	WHITE	Stage IB	Endometrioid endometrial adenocarcinoma	G3	0	55	0	55	0	55	0	55
TCGA-BG-A222	49	WHITE	Stage IA	Endometrioid endometrial adenocarcinoma	G3	0	291	0	291	0	291	0	291
TCGA-BG-A2AD	63	WHITE	Stage IIIB	Endometrioid endometrial adenocarcinoma	G3	0	609	0	609	0	609	0	609
TCGA-BG-A2AE	57	WHITE	Stage IB	Endometrioid endometrial adenocarcinoma	G3	0	721	0	721	0	721	0	721
TCGA-BG-A2L7	68	WHITE	Stage IA	Endometrioid endometrial adenocarcinoma	G3	0	612	0	612	0	612	0	612
TCGA-BG-A3EW	62	WHITE	Stage III	Endometrioid endometrial adenocarcinoma	G3	0	344	0	344	0	344	0	344
TCGA-BG-A3PP	82	WHITE	Stage II	Serous endometrial adenocarcinoma	G3	0	681	0	681	#N/A	#N/A	1	665
TCGA-BK-A0C9	57	WHITE	Stage IB	Endometrioid endometrial adenocarcinoma	G1	0	1092	0	1092	0	1092	0	1092
TCGA-BK-A0CA	61	WHITE	Stage IIIC	Mixed serous and endometrioid	G3	0	1064	0	1064	0	1064	0	1064
TCGA-BK-A0CB	60	WHITE	Stage IIIC	Endometrioid endometrial adenocarcinoma	G2	0	1092	0	1092	0	1092	0	1092
TCGA-BK-A0CC	69	BLACK OR AFRICAN AMERICAN	Stage IIIC	Serous endometrial adenocarcinoma	G3	0	1067	0	1067	1	1010	1	1010
TCGA-BK-A139	74	WHITE	Stage IB	Endometrioid endometrial adenocarcinoma	G3	1	943	1	943	#N/A	#N/A	1	684
TCGA-BK-A13B	58	BLACK OR AFRICAN AMERICAN	Stage IB	Endometrioid endometrial adenocarcinoma	G3	0	966	0	966	1	760	1	760
TCGA-BK-A13C	47	BLACK OR AFRICAN AMERICAN	Stage IB	Endometrioid endometrial adenocarcinoma	G2	0	760	0	760	0	760	0	760
TCGA-BK-A26L	71	WHITE	Stage IIIC1	Serous endometrial adenocarcinoma	G3	0	734	0	734	0	734	0	734
TCGA-BK-A4ZD	42	BLACK OR AFRICAN AMERICAN	Stage IA	Endometrioid endometrial adenocarcinoma	G3	0	506	0	506	0	506	0	506
TCGA-BK-A56F	75	BLACK OR AFRICAN AMERICAN	Stage IB	Endometrioid endometrial adenocarcinoma	G1	0	401	0	401	0	401	0	401
TCGA-BK-A6W3	34	BLACK OR AFRICAN AMERICAN	Stage II	Endometrioid endometrial adenocarcinoma	G2	0	305	0	305	0	305	0	305
TCGA-BK-A6W4	62	BLACK OR AFRICAN AMERICAN	Stage IA	Endometrioid endometrial adenocarcinoma	G2	0	300	0	300	0	300	0	300
TCGA-BS-A0T9	39	NATIVE HAWAIIAN OR OTHER PACIFIC ISLANDER	Stage IVB	Endometrioid endometrial adenocarcinoma	G3	1	1428	1	1428	#N/A	#N/A	1	634
TCGA-BS-A0TA	58	NATIVE HAWAIIAN OR OTHER PACIFIC ISLANDER	Stage IVB	Endometrioid endometrial adenocarcinoma	G3	1	740	1	740	#N/A	#N/A	1	394
TCGA-BS-A0TC	69	ASIAN	Stage IB	Endometrioid endometrial adenocarcinoma	G1	0	2602	0	2602	0	2602	0	2602
TCGA-BS-A0TD	65	ASIAN	Stage IB	Endometrioid endometrial adenocarcinoma	G1	0	2379	0	2379	0	2379	0	2379
TCGA-BS-A0TE	35	ASIAN	Stage IVB	Endometrioid endometrial adenocarcinoma	G3	1	146	1	146	#N/A	#N/A	1	58
TCGA-BS-A0TG	60	WHITE	Stage IIIA	Endometrioid endometrial adenocarcinoma	G2	0	2371	0	2371	0	2371	0	2371
TCGA-BS-A0TI	64	WHITE	Stage IC	Endometrioid endometrial adenocarcinoma	G3	0	1882	0	1882	0	1882	0	1882
TCGA-BS-A0TJ	59	ASIAN	Stage IC	Endometrioid endometrial adenocarcinoma	G3	0	2068	0	2068	0	2068	0	2068
TCGA-BS-A0U5	76	WHITE	Stage IA	Endometrioid endometrial adenocarcinoma	G1	0	2935	0	2935	0	2935	0	2935
TCGA-BS-A0U7	63	WHITE	Stage IC	Endometrioid endometrial adenocarcinoma	G2	1	935	0	935	0	935	0	935
TCGA-BS-A0U8	55	WHITE	Stage IIIC	Endometrioid endometrial adenocarcinoma	G1	0	2963	0	2963	0	2963	0	2963
TCGA-BS-A0U9	59	NATIVE HAWAIIAN OR OTHER PACIFIC ISLANDER	Stage IIA	Endometrioid endometrial adenocarcinoma	G3	0	2825	0	2825	0	2825	0	2825
TCGA-BS-A0UA	68	WHITE	Stage IB	Endometrioid endometrial adenocarcinoma	G1	0	3495	0	3495	1	520	1	520
TCGA-BS-A0UF	65	ASIAN	Stage IB	Endometrioid endometrial adenocarcinoma	G3	0	2611	0	2611	0	2611	0	2611
TCGA-BS-A0UJ	68	ASIAN	Stage IA	Endometrioid endometrial adenocarcinoma	G1	0	2506	0	2506	0	2506	0	2506
TCGA-BS-A0UL	54	NATIVE HAWAIIAN OR OTHER PACIFIC ISLANDER	Stage IA	Endometrioid endometrial adenocarcinoma	G1	0	2481	0	2481	0	2481	0	2481
TCGA-BS-A0UM	64	WHITE	Stage IB	Endometrioid endometrial adenocarcinoma	G1	0	2644	0	2644	1	1454	1	1454
TCGA-BS-A0UT	62	ASIAN	Stage IIB	Endometrioid endometrial adenocarcinoma	G2	0	2212	0	2212	0	2212	0	2212
TCGA-BS-A0UV	55	NATIVE HAWAIIAN OR OTHER PACIFIC ISLANDER	Stage IIIC	Endometrioid endometrial adenocarcinoma	G3	0	2228	0	2228	0	2228	0	2228
TCGA-BS-A0V4	56	WHITE	Stage IB	Endometrioid endometrial adenocarcinoma	G1	0	1810	0	1810	0	1810	0	1810
TCGA-BS-A0V6	55	ASIAN	Stage IB	Endometrioid endometrial adenocarcinoma	G1	0	2725	0	2725	0	2725	0	2725
TCGA-BS-A0V7	48	NATIVE HAWAIIAN OR OTHER PACIFIC ISLANDER	Stage IB	Endometrioid endometrial adenocarcinoma	G1	0	1934	0	1934	0	1934	0	1934
TCGA-BS-A0V8	68	NATIVE HAWAIIAN OR OTHER PACIFIC ISLANDER	Stage IIB	Endometrioid endometrial adenocarcinoma	G2	0	2544	0	2544	0	2544	0	2544
TCGA-BS-A0VI	58	WHITE	Stage IIB	Endometrioid endometrial adenocarcinoma	G3	0	2646	0	2646	0	2646	0	2646
TCGA-BS-A0WQ	55	ASIAN	Stage IA	Endometrioid endometrial adenocarcinoma	G2	0	2022	0	2022	0	2022	0	2022
TCGA-D1-A0ZN	60	WHITE	Stage IA	Endometrioid endometrial adenocarcinoma	G1	0	512	0	512	0	512	1	448
TCGA-D1-A0ZO	75	WHITE	Stage IB	Endometrioid endometrial adenocarcinoma	G1	0	602	0	602	0	602	0	602
TCGA-D1-A0ZP	59	WHITE	Stage IVA	Serous endometrial adenocarcinoma	G3	0	911	0	911	#N/A	#N/A	1	629
TCGA-D1-A0ZQ	90	WHITE	Stage IB	Endometrioid endometrial adenocarcinoma	G2	0	260	0	260	0	260	0	260
TCGA-D1-A0ZR	57	WHITE	Stage IB	Endometrioid endometrial adenocarcinoma	G2	0	17	0	17	0	17	0	17
TCGA-D1-A0ZS	54	WHITE	Stage IB	Endometrioid endometrial adenocarcinoma	G3	0	148	0	148	0	148	0	148
TCGA-D1-A0ZU	34	WHITE	Stage IB	Endometrioid endometrial adenocarcinoma	G2	0	872	0	872	0	872	0	872
TCGA-D1-A0ZV	58	WHITE	Stage IB	Endometrioid endometrial adenocarcinoma	G2	0	728	0	728	0	728	0	728
TCGA-D1-A0ZZ	80	WHITE	Stage IB	Mixed serous and endometrioid	G3	0	686	0	686	0	686	0	686
TCGA-D1-A101	60	WHITE	Stage IB	Endometrioid endometrial adenocarcinoma	G2	0	53	0	53	0	53	0	53
TCGA-D1-A102	49	WHITE	Stage IB	Endometrioid endometrial adenocarcinoma	G2	0	135	0	135	0	135	0	135
TCGA-D1-A103	87	WHITE	Stage IB	Endometrioid endometrial adenocarcinoma	G1	0	669	0	669	0	669	0	669
TCGA-D1-A15V	68	WHITE	Stage IB	Serous endometrial adenocarcinoma	G3	0	1201	0	1201	0	1201	0	1201
TCGA-D1-A15W	58	WHITE	Stage IIIC	Endometrioid endometrial adenocarcinoma	G1	0	915	0	915	0	915	0	915
TCGA-D1-A15X	45	WHITE	Stage IA	Serous endometrial adenocarcinoma	High Grade	0	909	0	909	0	909	0	909
TCGA-D1-A15Z	72	WHITE	Stage IB	Endometrioid endometrial adenocarcinoma	G2	1	58	0	58	0	58	0	58
TCGA-D1-A160	70	WHITE	Stage IB	Endometrioid endometrial adenocarcinoma	G2	0	112	0	112	0	112	0	112
TCGA-D1-A161	78	WHITE	Stage IC	Endometrioid endometrial adenocarcinoma	G1	0	892	0	892	0	892	0	892
TCGA-D1-A162	69	WHITE	Stage IB	Endometrioid endometrial adenocarcinoma	G1	0	1145	0	1145	0	1145	0	1145
TCGA-D1-A163	50	WHITE	Stage IIIC	Endometrioid endometrial adenocarcinoma	G2	0	991	0	991	1	223	1	223
TCGA-D1-A165	64	WHITE	Stage IIIA	Endometrioid endometrial adenocarcinoma	G1	0	20	0	20	0	20	0	20
TCGA-D1-A167	70	WHITE	Stage IC	Endometrioid endometrial adenocarcinoma	G2	0	478	0	478	0	478	0	478
TCGA-D1-A168	67	WHITE	Stage IB	Endometrioid endometrial adenocarcinoma	G3	0	1098	0	1098	0	1098	0	1098
TCGA-D1-A169	63	WHITE	Stage IV	Endometrioid endometrial adenocarcinoma	G2	0	1135	0	1135	#N/A	#N/A	1	519
TCGA-D1-A16B	64	WHITE	Stage IC	Endometrioid endometrial adenocarcinoma	G2	0	1106	0	1106	0	1106	0	1106
TCGA-D1-A16D	49	WHITE	Stage IC	Endometrioid endometrial adenocarcinoma	G2	0	1141	0	1141	0	1141	0	1141
TCGA-D1-A16E	73	WHITE	Stage IB	Endometrioid endometrial adenocarcinoma	G1	0	1119	0	1119	0	1119	0	1119
TCGA-D1-A16F	60	WHITE	Stage IB	Endometrioid endometrial adenocarcinoma	G2	0	80	0	80	0	80	0	80
TCGA-D1-A16G	74	WHITE	Stage IV	Serous endometrial adenocarcinoma	High Grade	1	834	1	834	#N/A	#N/A	1	642
TCGA-D1-A16I	62	WHITE	Stage IC	Serous endometrial adenocarcinoma	High Grade	1	350	0	350	0	350	0	350
TCGA-D1-A16J	61	WHITE	Stage IIB	Endometrioid endometrial adenocarcinoma	G2	0	910	0	910	0	910	0	910
TCGA-D1-A16N	51	WHITE	Stage IIIA	Endometrioid endometrial adenocarcinoma	G3	0	945	0	945	0	945	0	945
TCGA-D1-A16O	44	WHITE	Stage IB	Endometrioid endometrial adenocarcinoma	G1	0	1023	0	1023	0	1023	0	1023
TCGA-D1-A16Q	54	WHITE	Stage II	Endometrioid endometrial adenocarcinoma	G2	0	324	0	324	0	324	0	324
TCGA-D1-A16R	39	WHITE	Stage IA	Endometrioid endometrial adenocarcinoma	G1	0	21	0	21	0	21	0	21
TCGA-D1-A16S	70	WHITE	Stage IIIC	Serous endometrial adenocarcinoma	High Grade	0	568	0	568	0	568	0	568
TCGA-D1-A16V	78	WHITE	Stage IIIC	Endometrioid endometrial adenocarcinoma	G3	1	120	0	120	0	120	0	120
TCGA-D1-A16X	54	WHITE	Stage IB	Endometrioid endometrial adenocarcinoma	G2	0	111	0	111	0	111	0	111
TCGA-D1-A16Y	56	WHITE	Stage IB	Endometrioid endometrial adenocarcinoma	G1	0	532	0	532	0	532	0	532
TCGA-D1-A174	51	WHITE	Stage IA	Endometrioid endometrial adenocarcinoma	G3	0	594	0	594	0	594	0	594
TCGA-D1-A175	48	WHITE	Stage IC	Endometrioid endometrial adenocarcinoma	G3	0	202	0	202	0	202	0	202
TCGA-D1-A176	67	WHITE	Stage IB	Endometrioid endometrial adenocarcinoma	G2	0	917	0	917	0	917	0	917
TCGA-D1-A177	70	WHITE	Stage IB	Endometrioid endometrial adenocarcinoma	G2	0	548	0	548	1	347	1	347
TCGA-D1-A179	76	WHITE	Stage IIIC	Serous endometrial adenocarcinoma	High Grade	1	448	1	448	1	427	1	427
TCGA-D1-A17A	59	WHITE	Stage IIA	Endometrioid endometrial adenocarcinoma	G3	0	48	0	48	0	48	0	48
TCGA-D1-A17B	69	WHITE	Stage IB	Endometrioid endometrial adenocarcinoma	G2	0	213	0	213	0	213	0	213
TCGA-D1-A17C	78	WHITE	Stage IA	Endometrioid endometrial adenocarcinoma	G1	0	30	0	30	0	30	0	30
TCGA-D1-A17D	58	WHITE	Stage IB	Endometrioid endometrial adenocarcinoma	G3	0	926	0	926	0	926	0	926
TCGA-D1-A17F	68	WHITE	Stage IA	Endometrioid endometrial adenocarcinoma	G2	0	39	0	39	0	39	0	39
TCGA-D1-A17H	61	WHITE	Stage IB	Endometrioid endometrial adenocarcinoma	G1	0	852	0	852	0	852	0	852
TCGA-D1-A17K	74	WHITE	Stage IA	Endometrioid endometrial adenocarcinoma	G2	0	854	0	854	1	815	1	815
TCGA-D1-A17L	81	WHITE	Stage IA	Endometrioid endometrial adenocarcinoma	G1	0	802	0	802	0	802	0	802
TCGA-D1-A17M	56	WHITE	Stage II	Endometrioid endometrial adenocarcinoma	G1	0	311	0	311	0	311	0	311
TCGA-D1-A17N	46	[Not Available]	Stage IA	Endometrioid endometrial adenocarcinoma	G2	0	46	0	46	0	46	0	46
TCGA-D1-A17Q	54	WHITE	Stage IA	Endometrioid endometrial adenocarcinoma	G2	0	54	0	54	0	54	0	54
TCGA-D1-A17R	58	WHITE	Stage IA	Endometrioid endometrial adenocarcinoma	G2	1	339	0	339	0	339	0	339
TCGA-D1-A17S	59	WHITE	Stage IA	Endometrioid endometrial adenocarcinoma	G1	0	739	0	739	0	739	0	739
TCGA-D1-A17T	67	WHITE	Stage IA	Endometrioid endometrial adenocarcinoma	G2	0	71	0	71	0	71	0	71
TCGA-D1-A17U	53	WHITE	Stage IIIC2	Endometrioid endometrial adenocarcinoma	G2	0	697	0	697	0	697	0	697
TCGA-D1-A1NS	53	WHITE	Stage IA	Endometrioid endometrial adenocarcinoma	G1	0	43	0	43	0	43	0	43
TCGA-D1-A1NU	74	WHITE	Stage IA	Serous endometrial adenocarcinoma	G3	0	402	0	402	0	402	0	402
TCGA-D1-A1NW	72	WHITE	Stage IVB	Mixed serous and endometrioid	G3	0	22	0	22	#N/A	#N/A	0	22
TCGA-D1-A1NX	66	WHITE	Stage IIIC	Serous endometrial adenocarcinoma	G3	0	555	0	555	1	476	1	476
TCGA-D1-A1NY	67	WHITE	Stage IB	Endometrioid endometrial adenocarcinoma	G3	0	513	0	513	0	513	0	513
TCGA-D1-A1NZ	60	WHITE	Stage IA	Endometrioid endometrial adenocarcinoma	G1	0	548	0	548	0	548	0	548
TCGA-D1-A1O0	77	WHITE	Stage IA	Endometrioid endometrial adenocarcinoma	G3	0	63	0	63	0	63	0	63
TCGA-D1-A1O5	61	WHITE	Stage IA	Endometrioid endometrial adenocarcinoma	G1	0	458	0	458	0	458	0	458
TCGA-D1-A1O7	60	WHITE	Stage IA	Endometrioid endometrial adenocarcinoma	G1	0	32	0	32	0	32	0	32
TCGA-D1-A1O8	70	WHITE	Stage IIIC	Endometrioid endometrial adenocarcinoma	G3	1	120	0	120	0	120	0	120
TCGA-D1-A2G0	70	WHITE	Stage IB	Mixed serous and endometrioid	G3	0	1484	0	1484	#N/A	#N/A	0	1484
TCGA-D1-A2G5	50	WHITE	Stage IB	Endometrioid endometrial adenocarcinoma	G3	0	1455	0	1455	1	1122	1	1122
TCGA-D1-A2G6	53	WHITE	Stage IIIC	Endometrioid endometrial adenocarcinoma	G3	1	258	1	258	#N/A	#N/A	1	258
TCGA-D1-A2G7	65	WHITE	Stage IB	Serous endometrial adenocarcinoma	G3	1	1793	0	1793	0	1793	0	1793
TCGA-D1-A3DA	77	WHITE	Stage IIIC1	Endometrioid endometrial adenocarcinoma	G3	0	483	0	483	0	483	0	483
TCGA-D1-A3DG	81	WHITE	Stage IVB	Endometrioid endometrial adenocarcinoma	G3	1	130	0	130	#N/A	#N/A	0	130
TCGA-D1-A3DH	71	WHITE	Stage IA	Endometrioid endometrial adenocarcinoma	G3	0	573	0	573	0	573	0	573
TCGA-D1-A3JP	61	WHITE	Stage IA	Serous endometrial adenocarcinoma	G3	0	515	0	515	#N/A	#N/A	0	515
TCGA-D1-A3JQ	61	WHITE	Stage IIIC	Serous endometrial adenocarcinoma	G3	0	526	0	526	0	526	0	526
TCGA-DF-A2KN	#N/A	[Not Evaluated]	Stage IC	Endometrioid endometrial adenocarcinoma	G3	0	67	0	67	0	67	0	67
TCGA-DF-A2KR	84	[Not Evaluated]	Stage IIIC	Endometrioid endometrial adenocarcinoma	G3	0	2178	0	2178	0	2178	1	2113
TCGA-DF-A2KS	69	[Not Evaluated]	Stage IB	Endometrioid endometrial adenocarcinoma	G3	0	3318	0	3318	0	3318	1	2277
TCGA-DF-A2KU	#N/A	[Not Evaluated]	Stage IB	Endometrioid endometrial adenocarcinoma	G3	0	3067	0	3067	0	3067	0	3067
TCGA-DF-A2KV	55	[Not Evaluated]	Stage IB	Endometrioid endometrial adenocarcinoma	G3	0	2717	0	2717	#N/A	#N/A	0	2717
TCGA-DF-A2KY	49	[Not Evaluated]	Stage IVA	Endometrioid endometrial adenocarcinoma	G3	0	332	0	332	#N/A	#N/A	0	332
TCGA-DF-A2KZ	87	[Not Evaluated]	Stage IB	Endometrioid endometrial adenocarcinoma	G3	0	826	0	826	#N/A	#N/A	0	826
TCGA-DF-A2L0	60	[Not Evaluated]	Stage IIIC	Endometrioid endometrial adenocarcinoma	G3	1	788	1	788	1	523	1	523
TCGA-DI-A0WH	64	WHITE	Stage IB	Endometrioid endometrial adenocarcinoma	G3	0	496	0	496	0	496	0	496
TCGA-DI-A1BU	55	WHITE	Stage IIB	Mixed serous and endometrioid	G3	0	1195	0	1195	0	1195	0	1195
TCGA-DI-A1BY	63	WHITE	Stage IIB	Endometrioid endometrial adenocarcinoma	G2	0	1114	0	1114	0	1114	0	1114
TCGA-DI-A1C3	38	WHITE	Stage IB	Endometrioid endometrial adenocarcinoma	G2	0	739	0	739	0	739	0	739
TCGA-DI-A1NN	63	WHITE	Stage IIIC	Serous endometrial adenocarcinoma	G3	0	1076	0	1076	1	1023	1	1023
TCGA-DI-A1NO	68	BLACK OR AFRICAN AMERICAN	Stage IIIA	Endometrioid endometrial adenocarcinoma	G3	1	285	1	285	#N/A	#N/A	1	285
TCGA-DI-A2QT	51	AMERICAN INDIAN OR ALASKA NATIVE	Stage IIIC	Serous endometrial adenocarcinoma	G3	1	377	1	377	#N/A	#N/A	1	377
TCGA-DI-A2QU	67	WHITE	Stage IVB	Endometrioid endometrial adenocarcinoma	G3	1	946	1	946	#N/A	#N/A	1	946
TCGA-DI-A2QY	64	WHITE	Stage IIB	Serous endometrial adenocarcinoma	G3	1	3349	0	3349	0	3349	0	3349
TCGA-E6-A1LX	40	WHITE	Stage IB	Endometrioid endometrial adenocarcinoma	G3	0	711	0	711	0	711	0	711
TCGA-E6-A1LZ	76	BLACK OR AFRICAN AMERICAN	Stage IA	Serous endometrial adenocarcinoma	G3	0	2406	0	2406	0	2406	0	2406
TCGA-E6-A1M0	56	WHITE	Stage IIIC	Endometrioid endometrial adenocarcinoma	G3	0	1793	0	1793	0	1793	0	1793
TCGA-E6-A2P8	53	BLACK OR AFRICAN AMERICAN	Stage IV	Mixed serous and endometrioid	G3	1	72	1	72	#N/A	#N/A	1	60
TCGA-E6-A2P9	65	WHITE	Stage IA	Endometrioid endometrial adenocarcinoma	G3	0	1386	0	1386	0	1386	0	1386
TCGA-E6-A8L9	61	BLACK OR AFRICAN AMERICAN	Stage IB	Serous endometrial adenocarcinoma	G3	0	1013	0	1013	0	1013	0	1013
TCGA-EC-A1NJ	73	WHITE	Stage IA	Endometrioid endometrial adenocarcinoma	G2	0	488	0	488	0	488	0	488
TCGA-EC-A1QX	71	WHITE	Stage IB	Endometrioid endometrial adenocarcinoma	G3	0	224	0	224	#N/A	#N/A	1	219
TCGA-EC-A24G	57	WHITE	Stage II	Endometrioid endometrial adenocarcinoma	G3	0	511	0	511	0	511	0	511
TCGA-EO-A1Y5	63	[Not Available]	Stage IIIC2	Serous endometrial adenocarcinoma	G3	0	332	0	332	0	332	0	332
TCGA-EO-A1Y7	65	[Not Available]	Stage IB	Endometrioid endometrial adenocarcinoma	G3	0	1495	0	1495	#N/A	#N/A	1	880
TCGA-EO-A1Y8	87	[Not Available]	Stage IA	Serous endometrial adenocarcinoma	G3	0	1147	0	1147	0	1147	0	1147
TCGA-EO-A22R	56	[Not Available]	Stage IB	Endometrioid endometrial adenocarcinoma	G3	0	1878	0	1878	0	1878	0	1878
TCGA-EO-A22S	58	[Not Available]	Stage IB	Endometrioid endometrial adenocarcinoma	G3	0	1872	0	1872	0	1872	0	1872
TCGA-EO-A22T	56	ASIAN	Stage II	Endometrioid endometrial adenocarcinoma	G3	0	2035	0	2035	0	2035	0	2035
TCGA-EO-A22U	83	WHITE	Stage IB	Endometrioid endometrial adenocarcinoma	G3	0	1407	0	1407	0	1407	0	1407
TCGA-EO-A22X	36	[Not Available]	Stage IIIA	Endometrioid endometrial adenocarcinoma	G3	0	1752	0	1752	0	1752	0	1752
TCGA-EO-A22Y	68	WHITE	Stage IA	Endometrioid endometrial adenocarcinoma	G3	0	1567	0	1567	0	1567	0	1567
TCGA-EO-A2CG	69	ASIAN	Stage IA	Serous endometrial adenocarcinoma	G3	0	1564	0	1564	0	1564	0	1564
TCGA-EO-A2CH	73	[Not Available]	Stage IVB	Serous endometrial adenocarcinoma	G3	1	590	1	590	#N/A	#N/A	1	304
TCGA-EO-A3AS	86	[Not Available]	Stage IA	Endometrioid endometrial adenocarcinoma	G3	0	1046	0	1046	0	1046	0	1046
TCGA-EO-A3AU	72	[Not Available]	Stage II	Endometrioid endometrial adenocarcinoma	G3	0	1543	0	1543	0	1543	1	1178
TCGA-EO-A3AV	51	[Not Available]	Stage IIIC1	Endometrioid endometrial adenocarcinoma	G3	0	1069	0	1069	0	1069	0	1069
TCGA-EO-A3AY	58	[Not Available]	Stage IB	Endometrioid endometrial adenocarcinoma	G3	0	1158	0	1158	1	1163	1	1163
TCGA-EO-A3AZ	80	[Not Available]	Stage IB	Mixed serous and endometrioid	G3	0	826	0	826	0	826	0	826
TCGA-EO-A3B0	43	ASIAN	Stage IIIC2	Endometrioid endometrial adenocarcinoma	G3	0	1412	0	1412	#N/A	#N/A	0	1412
TCGA-EO-A3B1	63	[Not Available]	Stage IB	Serous endometrial adenocarcinoma	G3	0	820	0	820	0	820	0	820
TCGA-EO-A3KU	68	[Not Available]	Stage II	Serous endometrial adenocarcinoma	G3	0	677	0	677	0	677	0	677
TCGA-EO-A3KW	72	[Not Available]	Stage IA	Serous endometrial adenocarcinoma	G3	0	497	0	497	0	497	0	497
TCGA-EO-A3KX	80	WHITE	Stage IA	Endometrioid endometrial adenocarcinoma	G3	0	1170	0	1170	0	1170	0	1170
TCGA-EO-A3L0	76	WHITE	Stage IA	Endometrioid endometrial adenocarcinoma	G3	0	1554	0	1554	0	1554	0	1554
TCGA-EY-A1G7	86	WHITE	Stage II	Endometrioid endometrial adenocarcinoma	G2	1	189	1	189	1	95	1	95
TCGA-EY-A1G8	83	WHITE	Stage IB	Endometrioid endometrial adenocarcinoma	G3	1	456	0	456	0	456	0	456
TCGA-EY-A1GC	62	WHITE	Stage IB	Endometrioid endometrial adenocarcinoma	G3	0	1647	0	1647	0	1647	0	1647
TCGA-EY-A1GD	51	BLACK OR AFRICAN AMERICAN	Stage IA	Endometrioid endometrial adenocarcinoma	G1	0	1639	0	1639	0	1639	0	1639
TCGA-EY-A1GE	67	WHITE	Stage IA	Endometrioid endometrial adenocarcinoma	G1	0	741	0	741	0	741	0	741
TCGA-EY-A1GF	75	BLACK OR AFRICAN AMERICAN	Stage IA	Endometrioid endometrial adenocarcinoma	G2	0	826	0	826	0	826	0	826
TCGA-EY-A1GH	70	WHITE	Stage IA	Endometrioid endometrial adenocarcinoma	G2	0	710	0	710	0	710	0	710
TCGA-EY-A1GI	52	WHITE	Stage IB	Endometrioid endometrial adenocarcinoma	G2	0	710	0	710	0	710	0	710
TCGA-EY-A1GJ	73	BLACK OR AFRICAN AMERICAN	Stage IA	Endometrioid endometrial adenocarcinoma	G3	0	727	0	727	0	727	0	727
TCGA-EY-A1GK	74	WHITE	Stage IB	Endometrioid endometrial adenocarcinoma	G3	0	693	0	693	0	693	0	693
TCGA-EY-A1GL	51	WHITE	Stage II	Endometrioid endometrial adenocarcinoma	G2	0	1014	0	1014	0	1014	0	1014
TCGA-EY-A1GM	60	BLACK OR AFRICAN AMERICAN	Stage IIIA	Mixed serous and endometrioid	G3	1	995	1	995	1	791	1	791
TCGA-EY-A1GO	65	WHITE	Stage IIIC1	Endometrioid endometrial adenocarcinoma	G2	0	586	0	586	1	517	1	517
TCGA-EY-A1GP	54	BLACK OR AFRICAN AMERICAN	Stage IA	Endometrioid endometrial adenocarcinoma	G1	0	573	0	573	0	573	0	573
TCGA-EY-A1GQ	76	WHITE	Stage IB	Endometrioid endometrial adenocarcinoma	G3	0	544	0	544	1	334	1	334
TCGA-EY-A1GR	67	BLACK OR AFRICAN AMERICAN	Stage IA	Endometrioid endometrial adenocarcinoma	G3	0	536	0	536	0	536	0	536
TCGA-EY-A1GS	71	BLACK OR AFRICAN AMERICAN	Stage IVB	Serous endometrial adenocarcinoma	G3	1	670	1	670	#N/A	#N/A	1	670
TCGA-EY-A1GT	68	WHITE	Stage IIIA	Endometrioid endometrial adenocarcinoma	G1	0	490	0	490	0	490	0	490
TCGA-EY-A1GU	66	BLACK OR AFRICAN AMERICAN	Stage IB	Endometrioid endometrial adenocarcinoma	G2	1	997	0	997	0	997	0	997
TCGA-EY-A1GV	75	WHITE	Stage IIIC1	Mixed serous and endometrioid	G3	0	481	0	481	0	481	0	481
TCGA-EY-A1GW	73	WHITE	Stage IVB	Endometrioid endometrial adenocarcinoma	G3	1	337	1	337	#N/A	#N/A	1	190
TCGA-EY-A1GX	76	WHITE	Stage IIIA	Endometrioid endometrial adenocarcinoma	G2	1	1127	0	1127	1	743	1	743
TCGA-EY-A1H0	57	BLACK OR AFRICAN AMERICAN	Stage IIIC2	Endometrioid endometrial adenocarcinoma	G2	0	588	0	588	#N/A	#N/A	0	588
TCGA-EY-A210	82	BLACK OR AFRICAN AMERICAN	Stage IIIC2	Mixed serous and endometrioid	G3	0	383	0	383	0	383	0	383
TCGA-EY-A212	83	WHITE	Stage IIIC1	Serous endometrial adenocarcinoma	G3	1	310	1	310	#N/A	#N/A	1	310
TCGA-EY-A214	66	WHITE	Stage IIIC1	Endometrioid endometrial adenocarcinoma	G3	0	438	0	438	0	438	0	438
TCGA-EY-A215	60	WHITE	Stage IB	Endometrioid endometrial adenocarcinoma	G3	0	574	0	574	0	574	0	574
TCGA-EY-A2OM	55	WHITE	Stage IA	Endometrioid endometrial adenocarcinoma	G3	0	694	0	694	0	694	0	694
TCGA-EY-A2ON	61	BLACK OR AFRICAN AMERICAN	Stage IVB	Serous endometrial adenocarcinoma	G3	1	610	1	610	#N/A	#N/A	1	226
TCGA-EY-A2OO	56	WHITE	Stage IB	Mixed serous and endometrioid	G3	0	1392	0	1392	0	1392	0	1392
TCGA-EY-A2OP	63	WHITE	Stage IA	Endometrioid endometrial adenocarcinoma	G3	0	944	0	944	0	944	0	944
TCGA-EY-A2OQ	61	WHITE	Stage IA	Endometrioid endometrial adenocarcinoma	G3	0	885	0	885	0	885	0	885
TCGA-EY-A3L3	82	BLACK OR AFRICAN AMERICAN	Stage IA	Serous endometrial adenocarcinoma	G3	0	832	0	832	0	832	0	832
TCGA-EY-A3QX	64	WHITE	Stage IVB	Serous endometrial adenocarcinoma	G3	1	989	1	989	#N/A	#N/A	1	896
TCGA-EY-A4KR	56	BLACK OR AFRICAN AMERICAN	Stage IIIC1	Serous endometrial adenocarcinoma	G3	1	346	1	346	#N/A	#N/A	1	346
TCGA-EY-A547	75	BLACK OR AFRICAN AMERICAN	Stage IA	Endometrioid endometrial adenocarcinoma	G3	0	545	0	545	0	545	0	545
TCGA-EY-A548	83	BLACK OR AFRICAN AMERICAN	Stage IA	Endometrioid endometrial adenocarcinoma	G1	0	430	0	430	0	430	0	430
TCGA-EY-A549	78	BLACK OR AFRICAN AMERICAN	Stage IA	Endometrioid endometrial adenocarcinoma	G3	0	605	0	605	0	605	0	605
TCGA-EY-A54A	67	BLACK OR AFRICAN AMERICAN	Stage IIIC2	Endometrioid endometrial adenocarcinoma	G3	0	447	0	447	0	447	0	447
TCGA-EY-A5W2	72	BLACK OR AFRICAN AMERICAN	Stage IB	Endometrioid endometrial adenocarcinoma	G3	0	516	0	516	0	516	0	516
TCGA-EY-A72D	87	BLACK OR AFRICAN AMERICAN	Stage II	Endometrioid endometrial adenocarcinoma	G3	0	179	0	179	0	179	0	179
TCGA-FI-A2CX	82	WHITE	Stage IB	Endometrioid endometrial adenocarcinoma	G3	0	2031	0	2031	0	2031	0	2031
TCGA-FI-A2CY	60	BLACK OR AFRICAN AMERICAN	Stage IA	Mixed serous and endometrioid	G3	0	2080	0	2080	0	2080	0	2080
TCGA-FI-A2D0	55	WHITE	Stage IA	Endometrioid endometrial adenocarcinoma	G3	0	1213	0	1213	0	1213	0	1213
TCGA-FI-A2D2	66	WHITE	Stage IB	Mixed serous and endometrioid	G3	1	2352	1	2352	1	1917	1	1917
TCGA-FI-A2D4	44	WHITE	Stage IIIC	Endometrioid endometrial adenocarcinoma	G3	1	243	1	243	#N/A	#N/A	1	243
TCGA-FI-A2D5	56	WHITE	Stage IVB	Endometrioid endometrial adenocarcinoma	G3	1	421	1	421	#N/A	#N/A	1	280
TCGA-FI-A2D6	74	WHITE	Stage IB	Endometrioid endometrial adenocarcinoma	G3	1	767	0	767	0	767	0	767
TCGA-FI-A2EU	68	[Not Available]	Stage IA	Serous endometrial adenocarcinoma	G3	0	2941	0	2941	0	2941	0	2941
TCGA-FI-A2EW	71	BLACK OR AFRICAN AMERICAN	Stage IIB	Serous endometrial adenocarcinoma	G3	0	1795	0	1795	1	1169	1	1169
TCGA-FI-A2EX	58	WHITE	Stage IIIA	Serous endometrial adenocarcinoma	G3	0	284	0	284	1	213	1	213
TCGA-FI-A2EY	63	WHITE	Stage IIIA	Serous endometrial adenocarcinoma	G3	1	880	0	880	0	880	1	577
TCGA-FI-A2F4	64	BLACK OR AFRICAN AMERICAN	Stage IC	Endometrioid endometrial adenocarcinoma	G3	0	2230	0	2230	0	2230	0	2230
TCGA-FI-A2F8	64	WHITE	Stage II	Serous endometrial adenocarcinoma	G3	0	933	0	933	0	933	0	933
TCGA-FI-A2F9	79	WHITE	Stage IA	Endometrioid endometrial adenocarcinoma	G3	0	1803	0	1803	0	1803	0	1803
TCGA-FI-A3PV	68	BLACK OR AFRICAN AMERICAN	Stage IA	Serous endometrial adenocarcinoma	High Grade	1	1249	1	1249	#N/A	#N/A	1	1249
TCGA-FI-A3PX	57	WHITE	Stage IIIC2	Serous endometrial adenocarcinoma	High Grade	0	2384	0	2384	0	2384	0	2384
TCGA-H5-A2HR	71	BLACK OR AFRICAN AMERICAN	Stage IB	Endometrioid endometrial adenocarcinoma	G3	0	53	0	53	#N/A	#N/A	0	53
TCGA-JU-AAVI	61	BLACK OR AFRICAN AMERICAN	Stage IIIC1	Serous endometrial adenocarcinoma	G3	1	540	1	540	1	505	1	505
TCGA-K6-A3WQ	60	WHITE	Stage IVB	Serous endometrial adenocarcinoma	G3	1	427	1	427	#N/A	#N/A	1	351
TCGA-KJ-A3U4	55	WHITE	Stage IA	Serous endometrial adenocarcinoma	G1	0	1095	0	1095	#N/A	#N/A	1	306
TCGA-KP-A3VZ	69	WHITE	Stage IV	Serous endometrial adenocarcinoma	High Grade	0	722	0	722	#N/A	#N/A	0	722
TCGA-KP-A3W0	72	[Not Evaluated]	Stage IB	Serous endometrial adenocarcinoma	G3	0	404	0	404	0	404	0	404
TCGA-KP-A3W1	76	[Not Evaluated]	Stage IA	Serous endometrial adenocarcinoma	G3	0	288	0	288	0	288	0	288
TCGA-KP-A3W3	72	WHITE	Stage IB	Serous endometrial adenocarcinoma	G3	0	794	0	794	1	661	1	661
TCGA-KP-A3W4	63	WHITE	Stage IIIA	Serous endometrial adenocarcinoma	G3	1	554	1	554	#N/A	#N/A	1	321
TCGA-PG-A5BC	72	BLACK OR AFRICAN AMERICAN	Stage II	Serous endometrial adenocarcinoma	G3	0	707	0	707	0	707	0	707
TCGA-PG-A6IB	68	BLACK OR AFRICAN AMERICAN	Stage IA	Serous endometrial adenocarcinoma	G3	0	648	0	648	0	648	0	648
TCGA-PG-A7D5	62	BLACK OR AFRICAN AMERICAN	Stage IA	Serous endometrial adenocarcinoma	G3	0	1177	0	1177	#N/A	#N/A	0	1177
TCGA-PG-A914	73	BLACK OR AFRICAN AMERICAN	Stage IA	Serous endometrial adenocarcinoma	G3	0	687	0	687	0	687	0	687
TCGA-PG-A915	60	BLACK OR AFRICAN AMERICAN	Stage IA	Serous endometrial adenocarcinoma	G3	0	249	0	249	0	249	0	249
TCGA-PG-A916	70	BLACK OR AFRICAN AMERICAN	Stage I	Endometrioid endometrial adenocarcinoma	G2	0	522	0	522	0	522	0	522
TCGA-PG-A917	74	BLACK OR AFRICAN AMERICAN	Stage IA	Endometrioid endometrial adenocarcinoma	G2	0	212	0	212	0	212	0	212
TCGA-QF-A5YS	57	BLACK OR AFRICAN AMERICAN	Stage II	Mixed serous and endometrioid	G2	0	689	0	689	0	689	0	689
TCGA-QF-A5YT	57	BLACK OR AFRICAN AMERICAN	Stage II	Endometrioid endometrial adenocarcinoma	G1	0	1215	0	1215	0	1215	0	1215
TCGA-QS-A5YQ	55	BLACK OR AFRICAN AMERICAN	Stage IIIA	Endometrioid endometrial adenocarcinoma	G1	0	759	0	759	0	759	0	759
TCGA-QS-A5YR	61	BLACK OR AFRICAN AMERICAN	Stage IIIB	Endometrioid endometrial adenocarcinoma	G2	0	719	0	719	#N/A	#N/A	0	719
TCGA-QS-A744	86	BLACK OR AFRICAN AMERICAN	Stage IIIB	Endometrioid endometrial adenocarcinoma	G2	0	451	0	451	#N/A	#N/A	0	451
TCGA-QS-A8F1	85	BLACK OR AFRICAN AMERICAN	Stage IIIA	Serous endometrial adenocarcinoma	G3	1	135	1	135	#N/A	#N/A	1	135
TCGA-SJ-A6ZI	64	BLACK OR AFRICAN AMERICAN	Stage IB	Endometrioid endometrial adenocarcinoma	G1	0	631	0	631	0	631	0	631
TCGA-SJ-A6ZJ	61	BLACK OR AFRICAN AMERICAN	Stage IB	Endometrioid endometrial adenocarcinoma	G2	0	556	0	556	0	556	0	556
TCGA-SL-A6J9	73	BLACK OR AFRICAN AMERICAN	Stage IB	Endometrioid endometrial adenocarcinoma	G3	0	2	0	2	#N/A	#N/A	0	2
TCGA-SL-A6JA	77	BLACK OR AFRICAN AMERICAN	Stage IB	Endometrioid endometrial adenocarcinoma	G3	0	7	0	7	0	7	0	7

## Sheet: TCGA-CDR_Notes
Recommended use of the endpoints:
	For clinical outcome endpoints, we recommend the use of PFI for progression-free interval, and OS for overall survival. Both endpoints are relatively accurate. Given the relatively short follow-up time, PFI is preferred over OS. Detailed recommendations please refer to Table 3 in the accompanying paper.
	DFI was derived based on data fields of "treatment_outcome_first_course", "residual_tumor", and "margin_status". The endpoint is relatively accurate. For SKCM, THYM, UVM, DFI is not available.
	DSS is relatively accurate for CESC, PAAD, and UVM, and is approximated for other tumor types.
Data Columns:
Original Clinical Data
	type: cancer type such as brca, ov, blca, skcm, gbm, and so on.
	10 features from the main files: "age_at_initial_pathologic_diagnosis", "gender", "race", "ajcc_pathologic_tumor_stage", "clinical_stage", "histological_type", "histological_grade", "initial_pathologic_dx_year", "menopause_status", "birth_days_to" ; The values in "clinical_stage" for "THYM" are its "masaoka_stage" values.
Updated Clinical Data from follow-up files
	vital_status: the latest updated vital status from follow-up data.
	tumor_status: the latest updated tumor status from follow-up data.
	last_contact_days_to: the latest "last_contact_days_to" updated from the follow-up data files.
	death_days_to: the available "death_days_to" from the follow-up data files.
	cause_of_death: the available "cause_of_death" from the follow-up data files.
	new_tumor_event_type, new_tumor_event_site, new_tumor_event_site_other are the values corresponding to new_tumor_event_dx_days_to
	new_tumor_event_dx_days_to: smallest days from all new_tumor_event_dx_days_to in follow-up files
	treatment_outcome_first_course (for deriving DFI): the available data in the field of "treatment_outcome_first_course" from the main and follow-up files.
	residual_tumor (for deriving DFI): 5 diseases did not have "treament_outcome_first_course" but had "residual_tumor" from the main file. These 5 diseases were CHOL ,LIHC, MESO, SARC, and THCA.
	margin_status (for deriving DFI): BRCA did not have "treatment_outcome_first_course" nor "residual_tumor" but had "margin_status". SARC also had this field but its field of "residual_tumor" was used.
Derived Clinical Data
	OS: overall survival event, 1 for death from any cause, 0 for alive.
	OS.time: overall survival time in days, last_contact_days_to or death_days_to, whichever is larger.
	DSS: disease-specific survival event, 1 for patient whose vital_status was Dead and tumor_status was WITH TUMOR. If a patient died from the disease shown in field of cause_of_death, the status of DSS would be 1 for the patient. 0 for patient whose vital_status was Alive or whose vital_status was Dead and tumor_status was TUMOR FREE. This is not a 100% accurate definition but is the best we could …
	DSS.time: disease-specific survival time in days, last_contact_days_to or death_days_to, whichever is larger.
	DFI: disease-free interval event, 1 for patient having new tumor event whether it is a local recurrence, distant metastasis, new primary tumor of the cancer, including cases with a new tumor event whose type is N/A. Disease free was defined by: first, treatment_outcome_first_course is "Complete Remission/Response"; if the tumor type doesn't have "treatment_outcome_first_course" then disease-free …
		0 for censored otherwise. New primary tumor in other organ was censored; patients who were Dead with tumor without new tumor event are excluded; patients wih stage IV are excluded too.
	DFI.time: disease-free interval time in days, new_tumor_event_dx_days_to for events, or for censored cases, either last_contact_days_to or death_days_to, whichever is applicable.
	PFI: progression-free interval event, 1 for patient having new tumor event whether it was a progression of disease, local recurrence, distant metastasis, new primary tumors all sites , or died with the cancer without new tumor event, including cases with a new tumor event whose type is N/A.
		0 for censored otherwise.
	PFI.time: progression-free interval time in days, for events, either new_tumor_event_dx_days_to or death_days_to, whichever is applicable; or for censored cases, either last_contact_days_to or death_days_to, whichever is applicable.
Other
	Redaction: to show if the case is redacted.
