# Supplementary material for: Identification of prognostic immune-related genes in the tumor microenvironment of endometrial cancer
Source: Aging (Albany NY). 2020 Feb 19;12(4):3371–87. doi: 10.18632/aging.102817 (PMC7066904; doi:10.18632/aging.102817)
Supplement: Supplementary Table 3 [file aging-12-102817-s005..xlsx]

## Sheet: ImmuneDiff
Supplementary Table 3. Differentially expressed genes selected based on immune and stromal scores.
gene	conMean	treatMean	logFC	pValue	fdr
C1QL1	6.5109	2.78061	-1.22745	0.000917359	0.00227713
CD28	0.202015	0.556635	1.46227	7.47635e-42	4.45466e-40
TMEM156	0.126707	0.534117	2.07566	1.71657e-52	1.91773e-50
IL2	0.0901422	0.206773	1.19777	2.12779e-07	1.40802e-06
TDO2	0.287169	0.88873	1.62984	7.69876e-09	7.40365e-08
P2RX7	0.311915	0.730607	1.22794	6.40349e-32	2.44186e-30
VPREB3	1.49778	3.1893	1.09042	1.0429e-12	1.83438e-11
FOXI3	0.50485	0.241076	-1.06637	2.5954e-05	9.70054e-05
TESPA1	0.118284	0.49398	2.0622	9.6792e-66	4.07096e-63
SUCNR1	0.12079	0.49606	2.03802	7.73931e-22	2.0921e-20
CALCB	3.84227	1.11407	-1.78612	0.00232594	0.00517599
TAGAP	0.453201	1.34553	1.56995	3.37178e-47	2.63478e-45
CTSW	1.39809	6.27026	2.16507	5.64497e-48	4.69321e-46
APOBEC3H	0.495403	1.12108	1.17822	3.80213e-36	1.73707e-34
CCL17	0.475543	1.35331	1.50884	3.98226e-17	8.91179e-16
LRRC25	1.38857	3.63446	1.38814	3.30355e-53	3.87219e-51
NKX6-1	1.08615	0.320462	-1.761	0.0240468	0.0402234
C16orf54	0.368886	1.45875	1.98349	2.90321e-54	3.67398e-52
NTN3	0.19614	0.0909777	-1.1083	1.88006e-05	7.27004e-05
APOL3	1.2516	4.22761	1.75607	9.4269e-55	1.20361e-52
SP9	1.51657	0.505053	-1.5863	0.0204118	0.0349483
CD5	0.876312	3.0083	1.77943	1.4854e-50	1.46491e-48
OR2I1P	1.4749	7.76146	2.39571	7.08732e-35	3.07117e-33
CACNB4	0.229715	0.078496	-1.54916	0.00411015	0.00853793
TLR10	0.0816135	0.296726	1.86225	4.00893e-39	2.10763e-37
NKX1-2	0.285034	0.117353	-1.28028	0.00292985	0.00633265
ARX	1.851	0.861213	-1.10386	0.00029511	0.000832642
IFFO1	0.761678	1.71151	1.16802	1.80092e-49	1.62995e-47
WDR17	0.112784	0.0495217	-1.18743	0.00928575	0.017511
GNLY	1.91917	10.2137	2.41195	5.39675e-36	2.42684e-34
TNFRSF13B	0.0274417	0.238023	3.11666	1.1579e-40	6.5706e-39
XCL2	0.550317	1.69867	1.62607	6.28557e-39	3.2685e-37
CD200R1	0.130449	0.299802	1.20052	6.44558e-30	2.27585e-28
SAA4	0.429935	1.25644	1.54715	2.98406e-09	3.12386e-08
ASGR2	0.213611	0.500026	1.22702	4.38003e-32	1.67921e-30
LILRB1	0.480763	1.60081	1.73541	4.40918e-62	1.08709e-59
CX3CR1	0.47836	0.969003	1.0184	1.80505e-13	3.36974e-12
BTBD17	0.815169	0.2114	-1.94713	3.42789e-06	1.62474e-05
ERVW-1	0.225878	0.0266922	-3.08105	0.00263518	0.00576712
CXCL11	1.35737	6.82247	2.32948	6.37813e-33	2.53354e-31
CCR2	0.164056	0.898154	2.45277	1.16849e-52	1.33676e-50
JAML	0.289278	1.1871	2.03691	1.2743e-65	4.92501e-63
DDX25	0.146333	0.0475096	-1.62297	0.0196325	0.0338166
BLK	0.054454	0.232343	2.09315	6.07168e-31	2.23776e-29
ZCCHC12	4.46936	2.1534	-1.05346	0.00355443	0.00751787
POU2AF1	0.304608	1.58074	2.37558	1.29962e-35	5.7008e-34
CCL8	1.34824	2.91364	1.11175	2.36732e-13	4.37938e-12
CD180	0.433657	0.954908	1.13881	5.28892e-36	2.38585e-34
FMNL1	2.1616	4.32389	1.00023	6.00211e-41	3.447e-39
PRRT4	0.307232	0.0970694	-1.66224	0.000288917	0.000816989
NNMT	12.1904	25.6921	1.07558	5.04471e-17	1.12718e-15
DOCK2	0.344316	1.08165	1.65142	2.24031e-51	2.39077e-49
ITGAM	0.840064	2.45736	1.54854	2.65097e-45	1.91459e-43
EVI2A	0.825849	2.33074	1.49684	5.16312e-52	5.67943e-50
ASXL3	0.220887	0.0690376	-1.67785	5.52145e-07	3.24258e-06
INPP5D	1.28439	2.92559	1.18765	1.59562e-52	1.8109e-50
LILRA2	0.0996293	0.255588	1.35918	8.0044e-37	3.79017e-35
SLC26A7	3.06186	1.11731	-1.45437	4.91358e-06	2.2293e-05
RIMS4	2.26483	1.12348	-1.01143	9.00388e-06	3.78921e-05
NCR3	0.188716	0.745643	1.98227	1.10302e-43	7.30238e-42
SAA2	3.5826	9.74782	1.44407	1.25018e-08	1.13943e-07
RETN	0.175127	0.668827	1.93323	6.31834e-14	1.21278e-12
PSMB9	9.67301	30.0044	1.63314	2.15555e-41	1.26329e-39
SPI1	5.14039	17.367	1.7564	4.90518e-69	3.50721e-66
TRAT1	0.0868581	0.422813	2.28329	1.00885e-42	6.32741e-41
OVGP1	36.8318	78.7756	1.0968	0.000284439	0.00080544
RASGRP2	0.456415	0.951114	1.05927	1.90024e-30	6.84471e-29
SLAMF6	0.365631	1.87994	2.36223	6.84276e-57	1.03002e-54
CCL19	1.12661	7.00484	2.63636	4.05444e-34	1.72043e-32
SCGB1D4	60.4851	136.651	1.17584	0.00648957	0.0127948
GMFG	3.53971	10.7487	1.60246	1.29009e-68	8.02098e-66
STX11	0.614175	1.62171	1.40079	2.34157e-40	1.3029e-38
SAMSN1	0.758611	2.05603	1.43843	1.50449e-42	9.27337e-41
GIMAP5	0.0539023	0.136641	1.34197	1.56642e-31	5.8485e-30
TIGIT	0.28356	1.38236	2.28541	7.82197e-50	7.40756e-48
CD80	0.10439	0.258259	1.30683	1.30293e-27	4.25386e-26
MAP2	2.55426	1.18266	-1.11087	9.64515e-10	1.12135e-08
CD33	0.173496	0.478386	1.46327	1.15125e-48	1.01e-46
CD96	0.494473	1.60364	1.69739	2.73575e-47	2.16139e-45
CD300LF	0.403379	1.57072	1.96122	2.55919e-63	7.62425e-61
SH2D1A	0.240072	1.2397	2.36845	7.97802e-50	7.50564e-48
IL18BP	2.09598	4.7533	1.1813	1.73899e-43	1.13551e-41
FCGR3B	0.296479	0.743619	1.32664	1.43546e-14	2.82353e-13
PCDH8	0.26841	0.091517	-1.55233	0.00566759	0.0113686
CST7	4.11546	13.4728	1.71093	7.62511e-60	1.60352e-57
HLA-DPA1	13.717	47.0386	1.77788	4.86111e-51	4.96528e-49
KLRD1	0.0679172	0.233041	1.77873	9.95803e-27	3.1228e-25
VTN	0.215017	0.48258	1.16632	0.01289	0.0233532
RGS18	0.161045	0.405047	1.33062	8.13507e-37	3.83932e-35
GIMAP8	0.854569	1.9673	1.20295	9.12753e-47	6.97988e-45
CORO1A	4.37301	15.1468	1.79232	1.25967e-67	6.92818e-65
NPL	1.08024	2.18512	1.01636	4.53706e-27	1.44178e-25
MATK	0.520975	1.07838	1.04958	9.03923e-41	5.14984e-39
EPSTI1	2.35427	4.81995	1.03374	5.58357e-18	1.29199e-16
TNFSF14	0.601948	1.54141	1.35654	1.30764e-24	3.84757e-23
IL18RAP	0.132259	0.449057	1.76353	2.90302e-45	2.08609e-43
SP140	0.20067	0.909527	2.1803	2.1785e-60	4.72008e-58
ADRA1B	1.52136	0.73976	-1.04023	0.00182469	0.00420043
MMP9	10.7451	48.4965	2.1742	1.07785e-24	3.18456e-23
FCRL5	0.0432292	0.340756	2.97866	2.35783e-36	1.09471e-34
CD163	1.90695	5.22632	1.45453	1.12974e-29	3.96935e-28
ACAP1	0.868614	2.32915	1.42302	1.63421e-51	1.75709e-49
CXCL10	9.39341	37.3242	1.99039	8.61576e-32	3.2594e-30
PTCRA	0.0727292	0.193889	1.41463	9.99995e-23	2.77669e-21
FGR	1.09314	3.30101	1.59442	2.1346e-59	4.23956e-57
CD1A	0.554705	1.28801	1.21536	1.042e-11	1.6686e-10
CFD	5.0423	11.3108	1.16555	6.42286e-18	1.4814e-16
FBN3	2.59784	0.860724	-1.59369	1.22886e-08	1.12214e-07
CTSS	11.8997	26.9369	1.17866	3.06667e-39	1.61821e-37
PIK3R6	0.294507	0.707213	1.26384	3.22298e-53	3.80898e-51
KCNA3	0.0988693	0.296967	1.58671	2.11978e-27	6.88929e-26
NEURL3	0.652516	1.52365	1.22345	3.33738e-13	6.07183e-12
LILRB2	0.662614	2.25935	1.76967	2.14029e-55	2.91174e-53
SIRPG	0.335563	2.14661	2.6774	3.53503e-59	6.83121e-57
MYO1G	0.510764	1.60761	1.65419	1.33935e-61	3.19212e-59
PLEK	1.67689	5.6661	1.75657	3.98091e-54	4.95018e-52
PRAM1	0.450524	1.00501	1.15754	6.09822e-42	3.66405e-40
CD300E	0.300126	0.635298	1.08186	1.62021e-14	3.16517e-13
SIRPB2	0.15389	0.455116	1.56433	2.77888e-40	1.54023e-38
VAMP5	12.7577	31.9817	1.32588	6.799e-46	5.01164e-44
ARL11	0.270141	0.588643	1.12368	2.35405e-34	1.00486e-32
DOK2	1.17901	4.40719	1.90228	7.13735e-68	4.08257e-65
SLITRK2	0.516298	0.191997	-1.42712	0.000442245	0.00118919
KANK4	3.68998	1.79222	-1.04187	1.19821e-07	8.52881e-07
CD3E	1.89242	9.9475	2.39411	1.83799e-65	6.91664e-63
SEMA5B	2.43254	1.21283	-1.00409	0.00514952	0.0104407
CCR1	1.47223	3.32708	1.17625	1.08473e-35	4.77282e-34
FASLG	0.270428	1.152	2.09083	1.87365e-44	1.30053e-42
NCR1	0.0832421	0.225898	1.44029	3.56132e-22	9.71888e-21
CHRNA9	0.312034	0.132461	-1.23614	0.0087205	0.0165763
UBASH3A	0.192403	0.840914	2.12783	6.18373e-62	1.49877e-59
HLA-DPB1	29.219	100.27	1.77892	2.42661e-56	3.571e-54
HS3ST2	0.190169	0.417289	1.13376	3.77477e-10	4.73918e-09
TMIGD2	0.170111	0.562431	1.7252	2.39498e-33	9.75732e-32
CTXND1	1.0516	0.30687	-1.77689	5.35308e-06	2.4072e-05
GABRG3	0.222857	0.104757	-1.08906	3.99486e-05	0.000141683
COL9A3	6.22515	1.43125	-2.12084	5.92808e-06	2.64086e-05
IRF4	0.17568	1.07513	2.61349	1.05652e-46	8.03632e-45
TMEM88B	0.261109	0.126124	-1.04981	0.00925045	0.0174629
ACKR1	3.69988	10.0672	1.44411	1.13233e-20	2.90184e-19
SYT14	0.43191	0.211977	-1.02682	0.00443012	0.00912572
PPP1R16B	0.566286	1.17249	1.04997	3.52857e-29	1.23371e-27
HCST	3.34031	12.4569	1.89889	5.57403e-58	9.48912e-56
FCGR1B	0.084523	0.296933	1.81272	2.10715e-43	1.36964e-41
TIMD4	0.153862	0.387927	1.33415	3.40653e-19	8.31287e-18
PSTPIP1	0.57604	2.17999	1.92008	7.2071e-67	3.68077e-64
SLCO2B1	0.927943	2.38302	1.36069	1.9452e-38	9.79451e-37
GFAP	1.2026	0.128838	-3.22253	0.00305084	0.00655453
PAX2	9.33888	4.04459	-1.20726	2.95853e-05	0.000108647
ALOX5AP	2.95131	8.58521	1.5405	1.77222e-40	9.97745e-39
PTPRC	1.11379	3.81741	1.77712	1.27885e-47	1.02739e-45
TPSB2	1.43075	3.2878	1.20035	2.1856e-07	1.4401e-06
IRF8	1.03395	2.57204	1.31475	1.80791e-39	9.68283e-38
CD6	0.614939	2.26099	1.87844	2.33451e-57	3.62864e-55
HLA-DOA	3.68822	9.79111	1.40855	2.68243e-28	9.04688e-27
SLC9A3	1.07546	0.318501	-1.75558	0.00732384	0.0142181
TYMP	13.1203	33.3009	1.34376	2.94016e-42	1.77402e-40
ETV7	1.66792	4.10682	1.29997	9.56602e-29	3.27259e-27
ARHGAP30	1.64479	4.38171	1.41359	1.62319e-62	4.37955e-60
SAA2-SAA4	1.02136	2.67101	1.38689	9.86726e-08	7.19907e-07
RNASE2	0.669611	1.53686	1.19859	6.28134e-32	2.40169e-30
SERPINA4	1.40106	3.48201	1.3134	6.93802e-08	5.26612e-07
ADH1B	0.167319	0.407131	1.2829	0.000472213	0.00126076
CXCR1	0.173805	0.523258	1.59005	5.42137e-10	6.59793e-09
TRIM43	0.291992	0.125729	-1.21561	0.030528	0.0495517
CD19	0.517013	1.15037	1.15382	2.00481e-16	4.33062e-15
FCRL3	0.0601895	0.307563	2.3533	2.11694e-40	1.18715e-38
IDO1	14.1568	34.6235	1.29026	2.88086e-17	6.47741e-16
ANXA10	0.117303	0.312186	1.41217	0.00199778	0.00453824
ZSCAN23	0.24539	0.0905947	-1.43758	0.0254493	0.0423094
DAB1	0.381346	0.119852	-1.66985	0.00154054	0.00362178
IGSF6	1.17	3.84944	1.71815	5.43205e-58	9.35883e-56
FCER1G	13.2668	42.7805	1.68914	7.85599e-64	2.49646e-61
MYO1F	1.12008	3.38302	1.59471	4.83677e-74	8.64573e-71
HLA-DQB1	13.9658	43.1969	1.62903	9.23095e-42	5.45465e-40
TNFRSF4	1.74325	4.18498	1.26344	5.3908e-37	2.58686e-35
MSR1	0.854155	1.79274	1.0696	9.49124e-25	2.81004e-23
NYAP1	0.616818	0.292234	-1.07772	8.03206e-05	0.000262295
IL15RA	2.19775	4.72105	1.10308	7.37637e-37	3.50439e-35
AIF1	4.7159	16.3737	1.79578	3.29789e-59	6.46025e-57
CXCR6	0.503796	2.04293	2.01973	1.66219e-52	1.8716e-50
GFI1	0.303126	0.781932	1.36713	1.48362e-39	7.97588e-38
TLR8	0.127648	0.612418	2.26235	6.01064e-39	3.13694e-37
LRTM2	0.407859	0.197832	-1.04379	0.000137582	0.00042292
HPR	0.158934	0.667744	2.07087	0.00170734	0.00396154
CD247	0.519071	2.10581	2.02037	3.97119e-66	1.77462e-63
NLGN1	0.187161	0.0889029	-1.07398	0.000607754	0.00158361
SFTA2	6.65628	16.38	1.29915	1.65348e-06	8.54837e-06
ADAP2	1.41567	2.86789	1.0185	1.88258e-44	1.30053e-42
CCL18	2.64699	13.714	2.37322	7.17535e-19	1.73911e-17
ADAM21	0.208538	0.0994562	-1.06818	0.000503826	0.00133718
CALHM6	2.11095	7.64468	1.85656	9.79052e-45	6.86296e-43
ITGAD	0.0770414	0.192286	1.31955	1.21545e-16	2.65357e-15
SELP	0.616733	1.41395	1.19701	1.57133e-23	4.44071e-22
GPR183	1.97136	4.24077	1.10513	6.00307e-34	2.51742e-32
SLC46A2	0.419029	0.949749	1.1805	0.00436843	0.00901421
EYA4	0.477357	0.207549	-1.20161	0.00601636	0.0119875
RASAL3	0.858265	3.19606	1.8968	5.76387e-74	9.15815e-71
ERAS	2.13009	0.201778	-3.40008	0.00189665	0.0043444
CCL21	8.73385	24.0149	1.45924	6.90481e-11	9.94349e-10
CD4	4.69943	13.1801	1.4878	5.14119e-61	1.16697e-58
SLC37A2	0.541555	1.24303	1.19868	1.32595e-38	6.72378e-37
GDF3	0.451942	1.34	1.56802	0.000449591	0.00120645
SPN	0.513222	1.70239	1.72991	9.53083e-61	2.09678e-58
GPC5	0.199526	0.0457475	-2.12481	4.37608e-05	0.000153679
ZBTB8B	0.177228	0.076773	-1.20693	1.9529e-10	2.59299e-09
CD8B	1.97126	4.18308	1.08545	4.38188e-27	1.39557e-25
LY86	1.09822	3.25117	1.56579	5.80329e-51	5.80329e-49
PTPN7	0.793417	2.49899	1.65519	1.38785e-69	1.16742e-66
CD79B	1.16947	2.80066	1.25992	2.91368e-37	1.42203e-35
KRT36	0.162429	0.774896	2.25419	1.63341e-06	8.46604e-06
FCGR2B	0.360823	1.1053	1.61508	5.3666e-46	3.97629e-44
FCMR	1.14237	2.65831	1.21848	8.40806e-36	3.75735e-34
CD274	0.438699	0.984538	1.16621	9.04766e-31	3.30899e-29
TRPM5	0.499338	0.196844	-1.34296	0.0110225	0.0203384
SCUBE3	2.92896	0.976505	-1.58469	1.16909e-12	2.04377e-11
MEI1	0.191723	0.862527	2.16955	1.7037e-49	1.56173e-47
KLRC2	0.0516612	0.217538	2.07411	3.69934e-27	1.18346e-25
BMP3	1.77784	0.746087	-1.25271	0.00746336	0.0144615
GBP4	2.82409	8.97775	1.66857	8.78346e-41	5.02414e-39
HAVCR2	1.14521	3.80409	1.73194	1.24125e-62	3.41344e-60
PARP15	0.102219	0.334612	1.71082	1.19389e-42	7.39075e-41
CPA5	0.0775727	0.180678	1.2198	4.20117e-11	6.26451e-10
IGLL1	0.0873857	1.06886	3.61254	5.36423e-17	1.1967e-15
TLR7	0.202776	0.539366	1.41138	8.85194e-40	4.7948e-38
SLAMF8	1.44864	6.25876	2.11118	1.6294e-69	1.29447e-66
USH1G	0.64215	0.279996	-1.1975	1.61998e-06	8.41003e-06
SLC6A15	0.351677	0.149846	-1.23077	0.00298564	0.00643186
STAC2	4.77869	1.51455	-1.65772	0.00907735	0.017161
MAPK4	0.417807	0.181833	-1.20022	2.47756e-13	4.57149e-12
GBP1	6.88178	14.0368	1.02837	1.30069e-17	2.96648e-16
ZNF98	0.180892	0.0579733	-1.64167	0.00494688	0.0100741
SIT1	0.729129	3.09971	2.08789	1.29044e-53	1.56383e-51
IL21R	0.179369	0.875261	2.28678	2.27272e-64	7.38633e-62
HLA-DRB1	145.76	427.914	1.55373	4.09106e-47	3.16228e-45
EBI3	1.55858	4.22832	1.43986	3.85655e-40	2.1211e-38
CD79A	1.14521	10.6975	3.22359	9.93574e-43	6.25908e-41
C11orf21	0.134892	0.280505	1.05622	4.47149e-34	1.88621e-32
NOL4	0.19808	0.067505	-1.55302	9.62015e-05	0.000308656
VENTX	0.124679	0.256049	1.03821	6.41756e-25	1.91589e-23
ZNF683	0.499976	2.48849	2.31534	2.78638e-51	2.9298e-49
CD1C	0.441288	1.4333	1.69954	5.01834e-28	1.68061e-26
CCL13	0.454167	1.32469	1.54435	9.11888e-11	1.27468e-09
DPEP2	0.23174	0.654461	1.4978	4.66919e-51	4.80355e-49
TMEFF1	0.208476	0.0797779	-1.38582	1.93804e-13	3.6086e-12
C1orf162	1.62257	4.2578	1.39182	1.08992e-51	1.18976e-49
IKZF1	0.408827	1.26817	1.63319	1.93396e-57	3.07285e-55
GLP1R	0.263192	0.0893376	-1.55878	0.0156795	0.0277187
HTRA4	0.123142	0.433501	1.81572	4.18442e-33	1.68082e-31
ZNF114	1.8343	0.863418	-1.0871	4.82259e-05	0.00016694
IL16	0.342616	1.07077	1.64398	9.34081e-59	1.78098e-56
LSP1	3.54524	11.1835	1.65741	1.09252e-66	5.2077e-64
S100B	1.23574	2.60348	1.07506	2.04443e-21	5.43407e-20
NKG7	4.33707	27.8758	2.68422	1.32601e-63	4.12217e-61
SLC38A4	0.576276	0.279307	-1.04491	0.0101399	0.0189197
CASP5	0.0748144	0.207074	1.46876	2.66754e-21	7.05099e-20
AOAH	0.719507	2.18127	1.60009	2.60184e-53	3.10053e-51
NUGGC	0.076133	0.324993	2.09381	8.08661e-32	3.06734e-30
ICOS	0.164929	0.678812	2.04117	3.09514e-43	2.00274e-41
FCRL2	0.176982	0.469173	1.40651	1.73273e-21	4.62277e-20
BMPER	0.349023	0.110211	-1.66305	0.00458151	0.00940371
SLAMF7	0.661535	4.91406	2.89303	2.02944e-62	5.27654e-60
IRF1	6.69117	13.6855	1.03232	3.87437e-34	1.64891e-32
TMSB15A	9.83926	4.09031	-1.26634	8.4862e-11	1.19914e-09
PDCD1	0.72451	3.36673	2.21627	1.53502e-38	7.75647e-37
KCNJ4	1.17128	0.405787	-1.52929	0.00225032	0.00503515
CD7	2.08794	8.57632	2.03828	2.96948e-55	3.89574e-53
RCOR2	14.2177	7.0332	-1.01543	6.94415e-09	6.7323e-08
GYPC	2.07083	5.16241	1.31784	5.27309e-41	3.04053e-39
CERS3	0.28182	0.0427221	-2.72172	0.0101058	0.018861
GIMAP7	2.22338	6.47978	1.54319	8.33602e-50	7.79118e-48
TRPV2	1.80117	4.67692	1.37662	1.54797e-57	2.48718e-55
SLFN12L	0.0909805	0.228689	1.32976	5.79056e-30	2.05472e-28
FUT7	0.10798	0.392172	1.86072	5.73447e-48	4.74005e-46
CXCR2	0.212935	0.442651	1.05575	6.20755e-09	6.10089e-08
FREM3	0.169459	0.0608913	-1.47663	0.00138694	0.00329347
XCR1	0.0497574	0.163883	1.71968	3.74363e-30	1.33169e-28
SIGLEC9	0.411286	1.12566	1.45256	1.24515e-50	1.23651e-48
GPR174	0.122795	0.453721	1.88556	1.74192e-30	6.3062e-29
HTR1E	0.390615	0.0877457	-2.15435	0.0187253	0.0324217
CCR4	0.173513	0.522332	1.58993	9.68307e-34	4.02523e-32
BATF	2.67392	8.84747	1.72631	3.75717e-50	3.58183e-48
CCL23	0.146701	0.413925	1.49649	2.64456e-20	6.6933e-19
GZMH	0.911933	6.30371	2.7892	5.7106e-51	5.75082e-49
ARHGAP15	0.266484	0.695903	1.38484	5.03493e-57	7.65952e-55
GNG13	0.45736	0.221807	-1.04402	0.00456813	0.00938027
CD53	5.71457	18.8142	1.71911	1.91201e-68	1.13924e-65
CD1E	0.205087	0.68392	1.73759	5.03577e-22	1.36904e-20
ANGPTL7	0.391395	0.0838644	-2.22249	0.00725601	0.0141094
APOBR	1.53376	3.78732	1.3041	8.86502e-58	1.49141e-55
MYOD1	0.421249	0.122517	-1.78169	1.80174e-05	7.00322e-05
GABRQ	0.454401	0.14893	-1.60933	2.35918e-07	1.53626e-06
SIGLEC5	0.0680695	0.151542	1.15464	3.55236e-19	8.65397e-18
PSMB10	13.3465	28.7507	1.10714	4.89951e-37	2.35902e-35
ARHGAP36	0.20022	0.042229	-2.24528	7.53474e-08	5.67089e-07
STAB1	3.43267	7.08926	1.0463	3.07054e-40	1.69532e-38
DTNA	0.648647	0.308576	-1.07181	0.00210832	0.00475762
CD209	0.275439	0.767003	1.4775	1.56529e-16	3.39661e-15
TMC8	1.29218	3.58674	1.47287	2.44726e-56	3.571e-54
GPR84	0.554199	1.63515	1.56094	6.46392e-42	3.86754e-40
CXCL9	3.29153	23.0809	2.80987	6.19516e-38	3.08679e-36
ADAMDEC1	0.897078	3.9652	2.14409	4.62267e-34	1.94424e-32
IL32	17.3139	46.3909	1.42192	8.19204e-33	3.24504e-31
KCNIP4	0.8037	0.392758	-1.03302	3.50046e-09	3.5986e-08
GBX1	0.156091	0.0663306	-1.23464	0.00190895	0.00436977
SLC15A3	3.1183	7.94455	1.3492	9.29953e-43	5.88422e-41
TBX20	0.172464	0.085917	-1.00528	0.00146446	0.00345459
RHOH	0.242956	0.827525	1.76811	7.77504e-57	1.15816e-54
CLEC7A	0.613034	1.23619	1.01186	8.18561e-26	2.47472e-24
C15orf48	4.61237	10.1762	1.14162	9.76965e-19	2.348e-17
CHGA	27.2409	97.2296	1.83562	0.00125718	0.00301641
KYNU	0.22789	0.512541	1.16933	6.88245e-25	2.04613e-23
ARHGDIB	24.1904	57.7702	1.25589	1.83951e-62	4.8713e-60
RCSD1	0.775086	1.7753	1.19563	2.61555e-42	1.58485e-40
PLA2G2D	0.299083	4.33797	3.8584	9.5272e-46	6.95097e-44
MZB1	1.76727	11.7711	2.73566	4.65717e-44	3.14139e-42
MCEMP1	0.194346	0.54915	1.49857	8.96274e-11	1.25777e-09
SAA1	27.1278	77.2012	1.50885	8.35002e-10	9.81965e-09
LCK	1.52411	4.18611	1.45764	6.3794e-49	5.66618e-47
VSIG4	2.51251	7.15274	1.50936	1.78977e-33	7.37572e-32
CARTPT	4.09299	0.30545	-3.74415	0.000453411	0.0012145
CPNE5	0.800805	1.63157	1.02674	2.2332e-18	5.27847e-17
LYL1	0.826238	1.75693	1.08843	3.59283e-43	2.3143e-41
CCR5	0.647365	2.78272	2.10384	1.22647e-70	1.25275e-67
HLA-A	434.507	896.094	1.04427	7.35108e-26	2.23186e-24
CSF2RA	0.635588	1.52868	1.26612	2.40332e-46	1.79934e-44
MED12L	0.196247	0.0953634	-1.04116	6.50691e-05	0.000217626
TNIP3	0.170774	0.404344	1.2435	1.05659e-23	2.99215e-22
TRAF3IP3	0.200181	0.695897	1.79757	1.30416e-57	2.14362e-55
CIITA	1.18294	2.5598	1.11366	5.99757e-28	1.98072e-26
GAB3	0.286433	0.665152	1.21549	3.70074e-49	3.30753e-47
LAX1	0.140579	0.662144	2.23576	2.09132e-34	8.95387e-33
GAPT	0.164303	0.469037	1.51335	4.50928e-36	2.05359e-34
EMP3	11.2443	22.6364	1.00945	2.2028e-35	9.63303e-34
HLA-DOB	1.26772	2.77588	1.13071	3.49453e-24	1.01776e-22
FCGR3A	4.97273	14.8018	1.57366	4.14506e-33	1.6697e-31
RNASE6	3.46746	8.01306	1.20848	8.52182e-42	5.05652e-40
ALK	0.295097	0.144412	-1.031	0.00788909	0.0151713
GZMM	0.717924	3.6885	2.36113	1.36865e-59	2.79597e-57
CASP1	2.10804	4.74747	1.17126	2.55381e-39	1.35257e-37
VAV1	1.58882	3.3617	1.08124	3.55428e-36	1.62905e-34
AC136428.1	0.0697234	0.634419	3.18572	8.6621e-21	2.23993e-19
LGALS7B	4.93691	2.27483	-1.11785	0.00348166	0.00737814
IL7R	0.804947	2.21259	1.45877	2.47358e-33	1.00489e-31
CCL3	1.13937	4.17406	1.87322	1.91289e-39	1.02068e-37
CD3G	0.278626	1.1066	1.98973	2.93323e-47	2.30468e-45
CXorf21	0.257678	0.7193	1.48102	4.38218e-45	3.11767e-43
EGFL6	9.66019	3.71304	-1.37945	1.59178e-08	1.41206e-07
S1PR4	0.725821	2.78015	1.93748	5.0547e-60	1.07884e-57
APOC2	0.0619042	0.20845	1.75159	9.95408e-24	2.82989e-22
ZFHX4	0.447284	0.159789	-1.48502	0.0179536	0.0312674
DIRAS3	5.67631	2.82218	-1.00814	8.9817e-06	3.78316e-05
KRT9	0.342506	0.137484	-1.31686	0.010692	0.0197949
GIMAP2	1.79837	3.78389	1.07318	7.39616e-34	3.09255e-32
GZMK	0.488963	2.68518	2.45722	3.64187e-48	3.06346e-46
SIGLEC12	0.189859	0.493508	1.37814	2.26262e-12	3.83813e-11
WAS	2.22886	7.10696	1.67293	4.11281e-75	1.17626e-71
MS4A6A	1.45325	4.48062	1.62442	3.02463e-58	5.40652e-56
DLX1	0.808671	0.293955	-1.45996	0.00203903	0.00461949
VNN2	0.634956	1.78021	1.48732	3.17397e-21	8.3587e-20
FAM78A	0.671401	1.7151	1.35305	1.27551e-58	2.3688e-56
MRC1	0.412654	1.27379	1.62612	3.97875e-13	7.22032e-12
PCDHB3	1.39122	0.653148	-1.09087	0.00353924	0.00749022
KLRB1	0.631632	2.45165	1.95659	2.71969e-51	2.88086e-49
SASH3	1.75484	6.80851	1.956	4.71609e-78	6.74402e-74
IGF2BP1	0.784945	0.358992	-1.12864	0.00766337	0.0148009
NCKAP1L	0.698484	2.41249	1.78822	1.21724e-65	4.83514e-63
BIN2	0.716928	2.18315	1.60651	9.29096e-69	6.03912e-66
AIM2	0.296549	1.16888	1.97879	1.97747e-42	1.20845e-40
SLC18A2	0.947522	0.360906	-1.39254	0.00998337	0.0186617
STAT4	0.396975	0.804014	1.01817	8.948e-32	3.37616e-30
SELL	0.962025	3.82711	1.99211	3.06867e-48	2.61203e-46
HLA-DRB5	47.3484	161.519	1.77032	5.66171e-35	2.46086e-33
DLX2	0.913577	0.324236	-1.49448	0.023243	0.0390707
GZMB	2.42432	15.162	2.6448	4.84585e-36	2.1929e-34
SRGN	18.0888	44.9707	1.31389	1.61463e-43	1.05914e-41
TRIM71	0.350615	0.0891314	-1.97588	1.82184e-05	7.06789e-05
CD27	1.09083	5.56837	2.35182	1.03634e-58	1.94995e-56
TM4SF4	0.547154	1.48014	1.43571	0.00373069	0.0078385
GRAP2	0.151227	0.513321	1.76314	3.98091e-54	4.95018e-52
FPR3	1.53368	4.49489	1.55129	3.11453e-35	1.35786e-33
JCHAIN	10.0381	84.578	3.07479	3.37324e-41	1.96087e-39
TNFRSF1B	5.6215	14.1388	1.33063	6.02633e-61	1.34651e-58
APBB1IP	0.78838	2.75891	1.80713	4.85806e-70	4.63135e-67
GIMAP4	3.7185	10.0864	1.43963	9.70394e-56	1.34725e-53
IGLL5	2.37123	35.032	3.88497	4.3857e-43	2.81235e-41
CCL5	7.82328	45.2463	2.53196	1.14159e-65	4.66423e-63
PLD4	0.265072	0.651209	1.29674	3.7164e-28	1.24752e-26
HCK	2.52308	5.82358	1.20672	1.73094e-49	1.57658e-47
TYROBP	21.2665	73.4939	1.78904	2.12772e-65	7.60661e-63
CD300LB	0.116316	0.256182	1.13912	5.52173e-28	1.83629e-26
MYOZ1	1.63673	0.711851	-1.20117	0.0014417	0.00340653
IFNG	0.132132	0.950194	2.84624	5.96526e-31	2.20422e-29
FBN2	9.69818	3.47672	-1.47999	9.87372e-10	1.14327e-08
GAL3ST3	2.24737	0.847693	-1.40662	0.00158938	0.00372348
CCL4L2	0.949151	3.89246	2.03597	1.59194e-40	8.99794e-39
LTB	6.47344	21.868	1.75622	9.83844e-38	4.8347e-36
GDF6	0.175524	0.0824159	-1.09067	0.00465357	0.00954202
P2RY12	0.0556523	0.178629	1.68245	1.7175e-18	4.10022e-17
CD52	7.39535	26.4284	1.8374	4.0704e-65	1.41968e-62
LAPTM5	20.9871	67.2178	1.67934	7.11421e-73	9.24848e-70
TULP1	0.202537	0.0949822	-1.09246	2.56877e-10	3.3394e-09
MS4A1	0.066563	0.62684	3.2353	5.35722e-39	2.80616e-37
SH2D6	0.304172	0.146235	-1.0566	0.00271069	0.00591135
RAMP3	10.9804	23.1004	1.07298	1.19142e-19	2.94763e-18
SPSB4	0.609214	0.164264	-1.89094	9.45352e-09	8.92312e-08
GCK	0.546157	0.158693	-1.78308	0.0299243	0.0486934
CCL3L1	0.53567	1.62546	1.60143	5.54059e-25	1.65792e-23
TAS2R31	0.281617	0.13267	-1.08589	2.39785e-06	1.18239e-05
LST1	1.56192	5.70633	1.86924	1.29908e-69	1.16106e-66
SIGLEC14	0.482116	1.34919	1.48464	1.1479e-32	4.50959e-31
MARCO	0.901343	3.51417	1.96304	3.76252e-15	7.67533e-14
CTSE	0.854615	3.97064	2.21602	2.00431e-15	4.14185e-14
CAMKV	0.303246	0.112728	-1.42764	3.65333e-08	2.9449e-07
GBP5	1.08778	4.81166	2.14515	2.38621e-36	1.1043e-34
CLDN6	38.886	14.6564	-1.40772	0.000364402	0.00100326
CARD17	0.110796	0.23445	1.08137	4.20214e-09	4.25872e-08
SNX20	0.351252	1.49356	2.08818	2.70709e-77	1.93557e-73
ZAP70	0.975513	2.86868	1.55616	1.27885e-47	1.02739e-45
GZMA	3.64417	15.4675	2.08558	1.84416e-50	1.80626e-48
TNFRSF9	0.254616	0.778414	1.61222	8.27006e-44	5.52625e-42
SLC38A3	1.4616	0.68933	-1.08428	1.33661e-06	7.09753e-06
HLA-DQA1	3.50674	17.392	2.31022	3.00552e-62	7.54017e-60
KIRREL3	0.367575	0.140987	-1.38248	0.0205813	0.0351969
HLA-B	445.717	978.268	1.1341	5.99284e-29	2.075e-27
IL2RA	0.430162	1.26618	1.55753	4.70283e-37	2.27197e-35
CXCL13	1.93139	14.4258	2.90094	6.4762e-29	2.23695e-27
CCL25	0.380901	1.04009	1.44922	2.9673e-08	2.4485e-07
KCNK2	0.570128	0.148953	-1.93643	0.00415328	0.00861126
UTS2	0.0685562	0.17181	1.32546	4.37115e-10	5.43544e-09
APOBEC3G	1.6068	3.80509	1.24375	9.94252e-36	4.38821e-34
HMGA2	3.52343	1.04547	-1.75282	9.68079e-09	9.1016e-08
LILRA1	0.0964223	0.254925	1.40263	9.24939e-40	4.99118e-38
ARRDC5	0.121565	0.273023	1.16729	1.14712e-20	2.93449e-19
RALYL	0.20021	0.0586339	-1.7717	1.94721e-06	9.86626e-06
GPX2	14.1609	32.1125	1.18122	0.000154417	0.000467832
IL2RB	1.69238	5.9466	1.81301	1.20685e-48	1.05231e-46
C1S	12.8062	27.5679	1.10615	6.94632e-26	2.12249e-24
BATF2	2.1592	6.30356	1.54567	1.44827e-30	5.25639e-29
CD84	0.37819	1.213	1.6814	1.46535e-49	1.3519e-47
UPK2	7.78458	1.54889	-2.32938	1.72267e-05	6.73986e-05
CD38	0.467237	1.81406	1.957	9.35179e-39	4.79321e-37
TRIM31	1.38565	3.94951	1.51112	9.1443e-09	8.65984e-08
SIGLEC10	0.689927	2.69635	1.96649	2.81762e-57	4.33247e-55
FNDC5	0.874308	0.390449	-1.16301	0.000482468	0.00128526
ELOVL2	0.571017	0.265319	-1.1058	0.0282238	0.0462261
FCN1	0.235957	0.865277	1.87464	9.42367e-35	4.05899e-33
RGS7	0.379635	0.168268	-1.17385	0.000342858	0.00095092
TREM2	4.0486	10.8828	1.42655	1.24855e-30	4.54306e-29
PDCL2	1.17505	0.533517	-1.13911	0.00123711	0.00297572
CSTA	1.16019	2.74114	1.24041	5.9623e-28	1.97821e-26
TRIM15	0.712524	1.61401	1.17964	1.02586e-05	4.2584e-05
TIFAB	0.0325312	0.190205	2.54766	2.18944e-50	2.11547e-48
CSF1R	3.52791	10.2361	1.53679	1.23084e-51	1.33341e-49
CCR8	0.122868	0.347463	1.49975	1.02943e-13	1.95238e-12
APOC1	13.7742	52.4534	1.92907	4.59173e-36	2.0845e-34
ITGAL	1.15448	4.3783	1.92313	2.49203e-62	6.36358e-60
CYBB	2.64629	8.38754	1.66428	2.92529e-45	2.09158e-43
NXPH4	9.42293	4.03825	-1.22245	0.000430363	0.0011627
UNC5C	0.994023	0.461433	-1.10716	0.0147989	0.0263476
CST2	3.57419	8.00735	1.16371	1.89238e-07	1.27223e-06
NELL1	0.996575	0.404835	-1.29965	0.000262938	0.000751401
GPR65	0.271511	0.84261	1.63386	2.35534e-58	4.26346e-56
HK3	0.62879	2.2163	1.8175	1.29889e-47	1.03766e-45
APOE	74.7168	200.915	1.42708	6.94968e-28	2.28461e-26
CCR7	0.85583	2.54068	1.56982	3.92653e-53	4.52817e-51
TBX21	0.187763	0.781646	2.0576	3.32788e-51	3.44846e-49
SPINK1	1.68715	12.079	2.83984	0.000209433	0.00061522
TMEM100	1.50089	0.712814	-1.07422	0.00181865	0.00418797
DLK1	2.73136	0.267835	-3.35021	0.000397793	0.00108413
SOX11	0.9851	0.212305	-2.21413	5.78182e-05	0.000195924
RRAD	8.71727	18.1737	1.0599	1.32235e-06	7.03744e-06
TNFRSF17	0.175461	1.72037	3.29349	4.50429e-37	2.19086e-35
TCN1	1.97467	4.62033	1.22639	2.794e-06	1.35576e-05
CRABP1	36.5875	13.1136	-1.48029	1.59521e-05	6.28587e-05
KIR2DL4	0.148465	0.619122	2.0601	4.43946e-29	1.54463e-27
ZC3H12D	0.13271	0.306688	1.20849	3.09344e-41	1.80556e-39
NPY	1.77243	0.580668	-1.60995	0.00245683	0.00543092
MMP12	3.97883	8.93981	1.1679	5.01488e-06	2.27083e-05
CD68	0.152425	0.475666	1.64185	1.80195e-15	3.73989e-14
CD3D	2.4274	14.0026	2.52821	2.07013e-65	7.59048e-63
LAIR2	0.137496	0.399699	1.53953	9.55543e-20	2.38053e-18
SLAMF1	0.151901	0.714491	2.23378	1.47027e-57	2.38919e-55
FCRLA	0.0474056	0.346157	2.8683	6.29117e-30	2.22683e-28
CD2	2.35969	12.0062	2.34711	1.04047e-64	3.54254e-62
GIMAP6	1.33944	3.12723	1.22326	1.96926e-44	1.34739e-42
PDCD1LG2	0.386244	0.955913	1.30737	4.27391e-34	1.80819e-32
PTPRH	0.847735	1.73927	1.03679	1.74563e-05	6.81848e-05
EYA1	1.21184	0.573165	-1.08018	8.63121e-05	0.000279561
PTPRD	1.08947	0.461549	-1.23907	1.93539e-05	7.45382e-05
FAM177B	0.0890881	0.188571	1.0818	0.000364085	0.00100258
GPR25	0.114429	0.562298	2.29688	8.12594e-31	2.98717e-29
SLA2	0.430985	1.5315	1.82924	1.85898e-50	1.8084e-48
P2RY8	0.261864	1.026	1.97014	5.10617e-54	6.29468e-52
COL25A1	1.15602	0.391643	-1.56156	3.26887e-05	0.000118642
ABI3	2.49318	6.93494	1.4759	3.59822e-67	1.90573e-64
NOS2	0.280485	0.659492	1.23343	0.00346086	0.00734487
RARRES3	30.6413	91.3354	1.5757	1.90954e-33	7.82417e-32
CXCL5	4.85342	10.9045	1.16785	0.00640005	0.0126447
ZNF730	0.535566	0.224416	-1.25489	1.59761e-07	1.09836e-06
2019-09-01	1.38936	3.51603	1.33953	2.0097e-39	1.06835e-37
CGA	0.555629	0.173702	-1.67751	0.010097	0.0188494
PLA2G4D	0.494905	0.163465	-1.59817	0.00219537	0.00492605
P2RY13	0.286183	1.08364	1.92087	1.31122e-49	1.21756e-47
HSD11B1	0.49306	1.53092	1.63456	2.93403e-13	5.35845e-12
CLEC4E	0.3827	1.51761	1.98752	2.02611e-31	7.54514e-30
SLC7A7	1.57232	3.61387	1.20065	1.45725e-48	1.26295e-46
RAC2	6.16705	18.477	1.58308	6.20682e-55	7.99617e-53
CD1D	0.721094	1.50303	1.05961	9.65936e-34	4.02523e-32
PMCH	0.249572	1.43687	2.5254	0.00305617	0.00656304
SH2D7	0.167367	0.0413025	-2.01871	0.00128706	0.00307877
SLC5A5	0.486699	0.976212	1.00416	0.00195987	0.00446561
LILRB4	0.800419	3.56365	2.15453	5.56709e-55	7.23722e-53
DUSP9	1.69129	0.720472	-1.23111	7.82978e-06	3.35974e-05
ZBP1	0.230608	0.804073	1.80188	3.42227e-41	1.98131e-39
CRTAM	0.126456	0.515152	2.02637	2.6218e-44	1.78532e-42
ICAM3	0.17337	0.553684	1.67521	3.42362e-48	2.89691e-46
CXCR3	0.784067	4.54084	2.53391	4.70673e-61	1.08558e-58
IL2RG	3.31143	15.8786	2.26155	2.25982e-74	4.61648e-71
MNDA	0.863461	2.78618	1.69009	2.93305e-50	2.81495e-48
OLR1	0.891033	1.93055	1.11546	4.46481e-21	1.16935e-19
UPK1A	0.917823	0.341177	-1.4277	8.30049e-05	0.000270134
POU2F2	0.336188	0.769049	1.19381	8.71719e-31	3.1963e-29
ADGRE1	0.122423	0.369896	1.59525	9.49829e-32	3.57436e-30
CD1B	0.0674821	0.257092	1.92971	9.89806e-19	2.37487e-17
LAT2	1.07553	2.60359	1.27545	3.47437e-63	1.01395e-60
CCL4	1.28848	5.40091	2.06753	2.15835e-55	2.91174e-53
NCF2	2.05178	4.52461	1.14092	3.46283e-38	1.73142e-36
CNTFR	4.06074	1.7675	-1.20003	8.08339e-06	3.45568e-05
SCML4	0.0651932	0.196267	1.59002	1.61044e-46	1.21207e-44
LTA	0.178763	0.673814	1.91431	4.05828e-47	3.15399e-45
CLDN19	0.659386	0.23024	-1.51798	0.00708603	0.0138228
PTPN22	0.448666	1.02561	1.19277	1.50328e-29	5.26885e-28
LGALS2	1.21341	3.66707	1.59557	1.04603e-42	6.53199e-41
SLC7A10	0.524658	0.112387	-2.22291	0.000151384	0.00045991
AQP4	0.175063	0.0603748	-1.53586	2.49536e-08	2.10027e-07
GPSM3	5.68455	13.9094	1.29094	4.69576e-56	6.64845e-54
FCER1A	0.618505	1.26861	1.03639	4.08727e-07	2.49414e-06
ITK	0.16156	0.551503	1.7713	1.10937e-42	6.89739e-41
FPR1	0.883799	2.31899	1.39171	5.85432e-27	1.85625e-25
CXorf65	0.103541	0.309118	1.57796	1.44628e-31	5.41408e-30
IL12RB1	0.295052	1.23516	2.06565	2.63553e-69	1.98358e-66
LTF	107.503	226.763	1.07681	0.00122705	0.00295252
LHX9	0.640728	0.176972	-1.85619	0.0172509	0.0301391
ACP5	11.1102	25.9743	1.2252	4.11121e-32	1.58465e-30
ORM1	4.88203	16.2964	1.73901	4.0455e-05	0.000143301
TFEC	0.153225	0.493689	1.68795	7.16888e-39	3.71431e-37
LILRB5	0.098562	0.282878	1.52108	1.60067e-13	2.99602e-12
HIF3A	2.09484	0.783416	-1.41899	0.000211949	0.000621461
UGT3A1	0.259619	0.105525	-1.2988	0.0103661	0.0192871
PNPLA5	0.227715	0.110533	-1.04275	1.23778e-05	5.03113e-05
CNMD	0.483333	0.100624	-2.26404	3.28394e-05	0.000119159
IMPG1	0.288151	0.078589	-1.87442	4.52478e-07	2.71982e-06
CMKLR1	0.680596	2.09506	1.62212	4.90503e-48	4.10186e-46
FCGR1A	0.523808	1.85583	1.82495	3.83084e-53	4.45374e-51
TBC1D10C	1.48987	3.21818	1.11106	2.04237e-36	9.51334e-35
CYTIP	1.02257	3.10975	1.60461	4.94006e-51	5.01014e-49
UGT3A2	0.842104	0.337019	-1.32117	2.50171e-05	9.39207e-05
LCP2	1.04735	3.14191	1.58489	1.60963e-64	5.35297e-62
CLEC2B	1.34622	3.24321	1.26851	1.2267e-43	8.08382e-42
NTNG1	0.365064	0.105584	-1.78976	0.00111129	0.00270494
TMEM59L	3.18135	1.11329	-1.51481	0.0239499	0.0400801
PLAC8	0.816843	1.65679	1.02026	1.92447e-17	4.36131e-16
SERPINA1	57.4191	130.226	1.18142	9.26833e-15	1.84849e-13
ZNF460	1.5107	0.717536	-1.07409	4.61721e-05	0.000160922
CCL14	0.0572146	0.127406	1.15497	6.76606e-08	5.14653e-07
CEACAM7	2.72963	6.56776	1.2667	0.00606722	0.012077
TMIGD3	0.402767	0.909007	1.17435	1.05506e-27	3.45248e-26
GIMAP1	0.478069	1.35029	1.49798	1.83422e-63	5.58071e-61
CCKBR	1.76684	0.622391	-1.50528	8.70332e-07	4.83894e-06
PEAK3	0.0986401	0.22911	1.21579	2.37911e-33	9.72038e-32
CEACAM4	0.128311	0.386702	1.59158	1.33405e-31	5.00705e-30
TAP1	20.0995	40.848	1.02311	6.08642e-23	1.69661e-21
ZMAT4	0.228665	0.101946	-1.16543	0.0241815	0.040429
CD48	0.933696	4.31008	2.20669	1.68414e-76	8.02775e-73
PRF1	1.49107	7.02365	2.23587	1.1032e-47	8.96351e-46
CHI3L2	0.522807	1.46649	1.48801	5.21323e-19	1.26573e-17
CD300A	1.54564	3.87777	1.32702	1.33075e-46	1.00686e-44
IL10RA	0.972629	3.16933	1.70422	6.008e-63	1.71829e-60
MILR1	0.925335	2.04	1.14052	1.44566e-36	6.77802e-35
KLRC1	0.0769306	0.290754	1.91817	2.95535e-33	1.19721e-31
BCL2A1	1.49141	4.72361	1.66321	2.07204e-45	1.50407e-43
FGD2	0.264966	0.701529	1.4047	8.71252e-44	5.79484e-42
ARHGAP9	0.705099	2.65626	1.9135	3.765e-75	1.17626e-71
TCL1A	0.127255	0.394104	1.63085	3.15805e-21	8.33212e-20
TNFAIP8L2	1.52611	5.02988	1.72066	5.28838e-69	3.60114e-66
CLECL1	0.1085	0.367042	1.75825	7.15234e-46	5.24505e-44
FFAR2	0.269438	0.684993	1.34613	5.93002e-11	8.64416e-10
IGDCC3	0.718149	0.192439	-1.89988	5.33137e-06	2.39819e-05
ARHGAP25	1.01827	2.384	1.22727	3.29169e-56	4.70711e-54
CYTH4	0.877561	2.85979	1.70434	9.66606e-72	1.06327e-68
SLA	0.738734	2.21122	1.58171	1.66749e-58	3.05706e-56
CD14	19.5104	58.3921	1.58153	8.6054e-54	1.05177e-51
FCER2	0.044036	0.168545	1.93638	1.46213e-19	3.60491e-18
FOLR2	2.24236	5.06791	1.17637	2.08771e-20	5.3027e-19
SIGLEC7	0.239926	0.691613	1.52738	2.15813e-38	1.08285e-36
HLA-F	9.17507	24.8605	1.43806	1.3072e-32	5.12136e-31
SIGLEC1	0.777961	2.2626	1.54021	2.68905e-27	8.68023e-26
CACNA2D2	2.52825	1.07979	-1.22739	8.54657e-06	3.62982e-05
C1QA	28.6412	129.149	2.17288	1.45065e-61	3.4007e-59
SERTM2	0.334705	0.73808	1.14089	0.013115	0.0237159
EVI2B	1.30406	4.96953	1.9301	1.29889e-59	2.69191e-57
LCN2	151.403	354.324	1.22668	3.09456e-09	3.22303e-08
CLEC12A	0.071315	0.357504	2.32568	1.85901e-36	8.68753e-35
LAG3	1.36766	6.49489	2.2476	7.51739e-38	3.73259e-36
IGFL2	0.120059	0.343529	1.51669	2.28113e-07	1.49291e-06
MPEG1	1.59255	5.16334	1.69696	3.84991e-58	6.79675e-56
THEMIS	0.0974667	0.381943	1.97038	9.9013e-37	4.65752e-35
CEACAM3	0.0829806	0.210247	1.34124	6.17208e-16	1.30757e-14
LILRA5	0.407373	1.13841	1.4826	2.07764e-28	7.05706e-27
PIK3R5	0.425706	0.956005	1.16716	2.23211e-55	2.9831e-53
SERPIND1	0.322004	2.38563	2.88922	0.014573	0.025981
RGS1	4.52568	10.5342	1.21887	4.84298e-21	1.26608e-19
CLDN9	7.90462	3.57613	-1.1443	0.00757379	0.0146398
LYZ	8.91177	49.3553	2.46942	6.93775e-37	3.30699e-35
ITGAX	1.28512	3.64644	1.50458	1.02936e-55	1.41537e-53
AC092835.1	0.340069	0.155679	-1.12726	1.76753e-07	1.19796e-06
UBD	1.54842	7.14499	2.20613	1.12794e-32	4.44341e-31
CD37	1.64338	5.60144	1.76913	3.12617e-66	1.44207e-63
RAB37	0.258851	0.524894	1.0199	9.06432e-29	3.10839e-27
FLG	0.402563	0.0935215	-2.10584	0.000167503	0.000503212
SLC2A5	0.690762	1.39631	1.01535	6.82795e-28	2.24976e-26
BTK	0.339975	1.11558	1.7143	9.41401e-58	1.56535e-55
SELPLG	3.24922	10.525	1.69566	8.53296e-72	1.01684e-68
CD40LG	0.154796	0.635889	2.03841	7.6246e-49	6.73036e-47
APOD	7.05815	18.6786	1.40402	3.65407e-07	2.27188e-06
CD244	0.152727	0.533519	1.80459	2.90078e-51	3.02782e-49
P2RY10	0.181917	0.72324	1.99119	5.98277e-44	4.0166e-42
EPHA8	0.295464	0.0812066	-1.86331	0.0001158	0.000362603
ISM2	0.431775	0.205498	-1.07115	0.0021194	0.00477945
MS4A7	0.976431	2.21779	1.18354	3.10939e-30	1.11161e-28
ADAMTS3	0.471611	0.214115	-1.13921	1.45454e-05	5.80841e-05
LILRA6	0.112862	0.303651	1.42785	2.57389e-27	8.3273e-26
C1QC	33.1057	123.485	1.89918	6.69538e-56	9.38666e-54
IL11	1.3308	0.619614	-1.10285	0.000241377	0.000696467
NCF1	0.286411	1.32253	2.20714	1.01032e-62	2.83287e-60
OLFM4	19.8877	48.6543	1.29069	0.0148471	0.0264203
HAMP	0.385924	1.37292	1.83086	1.7782e-33	7.34919e-32
LAIR1	0.83898	2.71	1.69158	7.83276e-67	3.86236e-64
LCN6	0.0723369	0.289745	2.00198	0.00361631	0.00762844
TMEM150B	0.32886	0.909685	1.46789	1.23324e-28	4.19887e-27
KIAA1549L	0.474144	0.217318	-1.12552	0.000107039	0.000338491
MATN4	0.61037	0.267183	-1.19186	0.00258965	0.00568319
C3AR1	1.55164	4.6693	1.58942	2.5805e-53	3.10053e-51
VCAM1	0.960596	2.293	1.25523	2.68939e-23	7.57052e-22
CLLU1OS	0.162447	0.417926	1.36327	0.00022695	0.000659765
LY96	1.90683	5.69726	1.57909	5.73307e-45	4.03857e-43
HLA-DQA2	4.66825	17.7451	1.92647	7.49273e-16	1.58032e-14
LIN28B	0.523115	0.255681	-1.03278	6.89381e-05	0.000228834
CARD16	2.17098	5.49768	1.34048	1.71799e-47	1.36485e-45
PDZK1IP1	30.5267	67.3974	1.14262	4.67763e-11	6.93162e-10
DPYSL5	0.599535	0.220542	-1.44279	0.00341584	0.0072591
HLA-DMA	24.9514	56.3666	1.17572	9.87611e-36	4.37239e-34
FGL2	2.12633	4.73811	1.15595	9.17406e-36	4.08689e-34
STAP1	0.144479	0.413135	1.51575	1.79691e-30	6.48883e-29
SELENOV	0.597154	0.181867	-1.71522	1.09853e-05	4.5229e-05
DPEP1	3.30224	7.77946	1.23623	1.26146e-05	5.10727e-05
C2	2.86224	6.47419	1.17756	2.73062e-28	9.18774e-27
VSIR	3.44462	7.66549	1.15403	2.67771e-44	1.81475e-42
CCRL2	0.323563	0.918417	1.5051	2.75546e-56	3.9801e-54
FYB1	0.816365	2.5456	1.64072	1.92544e-44	1.32374e-42
CTLA4	0.492937	1.60824	1.70601	4.36568e-40	2.39193e-38
SIGLEC8	0.0978939	0.439754	2.16741	1.84305e-33	7.57344e-32
EOMES	0.187663	0.605769	1.69062	1.95965e-30	7.04096e-29
CD86	0.851843	2.73945	1.68523	2.16153e-57	3.39668e-55
FOXP3	1.00162	2.47386	1.30442	5.74273e-40	3.13439e-38
PRKCB	0.239494	0.699736	1.54682	3.09463e-46	2.30485e-44
TPSAB1	1.46509	3.35792	1.19658	3.94698e-10	4.93905e-09
CLEC10A	0.457462	1.96599	2.10353	6.92795e-43	4.4031e-41
SIRPB1	0.100733	0.353128	1.80965	3.61883e-33	1.46184e-31
HLA-DRA	233.154	635.559	1.44674	1.86774e-42	1.1463e-40
APOBEC3D	1.18324	2.51469	1.08764	7.61867e-29	2.61892e-27
FADS6	0.201427	0.067266	-1.5823	6.61577e-06	2.90736e-05
AARD	1.18141	0.569301	-1.05325	3.45151e-05	0.000124355
CD74	501.06	1314.5	1.39146	1.07517e-41	6.32714e-40
C1QL4	5.08293	1.666	-1.60928	8.78294e-06	3.71493e-05
CD8A	1.12214	5.58024	2.31408	4.48867e-47	3.45096e-45
CSF2RB	0.619798	2.01047	1.69767	1.46874e-48	1.26524e-46
GPC3	9.70785	4.77028	-1.02508	0.0108091	0.0199754
PYHIN1	0.138439	0.614334	2.14977	1.03616e-47	8.46692e-46
MYOC	1.05577	3.16525	1.58402	0.00306763	0.00658269
GNGT2	0.404651	1.16743	1.52859	5.3394e-58	9.3114e-56
FCGR2A	1.61062	3.63284	1.17348	8.07457e-39	4.15347e-37
TET1	0.955189	0.466661	-1.03341	9.16008e-17	2.01832e-15
CD72	0.833546	1.89285	1.18322	2.55334e-32	9.92195e-31
MS4A4A	1.00766	2.75801	1.45262	5.59495e-43	3.57177e-41
IL4I1	16.1409	36.2778	1.16836	7.47371e-19	1.80836e-17
AGAP2	0.374299	0.827024	1.14374	5.60471e-45	3.96769e-43
HMOX1	9.54335	23.7671	1.3164	1.50089e-24	4.40713e-23
TNFSF13B	0.794975	2.34565	1.56101	1.20143e-37	5.88374e-36
GPR171	0.321287	1.01538	1.66009	9.53567e-36	4.23478e-34
CD300C	0.392233	1.03847	1.40467	4.52941e-37	2.19561e-35
FDCSP	1.54305	3.42446	1.15009	3.89039e-05	0.000138321
ABCD2	0.05543	0.138589	1.32207	2.20146e-22	6.05401e-21
CLEC4A	0.814351	1.67351	1.03916	9.90166e-45	6.90701e-43
NCF4	1.94775	6.78771	1.80111	1.03345e-73	1.47783e-70
FERMT3	3.22674	10.1534	1.65381	2.2161e-74	4.61648e-71
SCIMP	0.261256	0.852062	1.70549	2.77667e-55	3.67652e-53
P2RX1	0.138392	0.46798	1.75768	1.05667e-23	2.99215e-22
APOL1	49.5785	125.638	1.34148	6.76503e-27	2.14026e-25
OSCAR	0.811128	2.32599	1.51984	7.89355e-48	6.48723e-46
ARC	0.967083	0.445072	-1.1196	0.00177661	0.00410296
LILRB3	0.191216	0.475606	1.31457	9.63704e-38	4.75206e-36
LY9	0.0772525	0.311907	2.01346	2.28522e-52	2.53323e-50
ZFP57	0.0704182	0.15251	1.11489	0.0106832	0.0197812
C1QB	26.6152	116.231	2.12668	1.4422e-59	2.90472e-57
GBP2	5.35888	12.8159	1.25793	1.26275e-38	6.42609e-37
SPOCK3	0.742951	0.165859	-2.16331	0.000169784	0.000509636
SIGLEC11	0.15382	0.376535	1.29154	2.57231e-18	6.05997e-17
PLCB2	1.10048	2.63236	1.25822	2.58317e-48	2.21194e-46
CHIT1	0.271091	1.91351	2.81937	3.27098e-18	7.68062e-17
SH2D1B	0.101058	0.207605	1.03866	3.30194e-15	6.77443e-14
GCGR	1.0012	0.462516	-1.11416	0.00989997	0.0185131
LILRA4	0.0593384	0.211192	1.83152	2.60832e-32	1.01081e-30
BHLHE22	0.176242	0.432634	1.29559	2.35341e-13	4.35929e-12
ITGB2	4.42019	16.4398	1.89501	4.68606e-66	2.03063e-63

## Sheet: StromalDiff
gene	conMean	treatMean	logFC	pValue	fdr
PTGIR	0.343651	0.734029	1.09489	8.96117e-33	9.35695e-31
C3orf70	0.25484	0.546338	1.1002	9.02629e-21	2.15988e-19
AEBP1	23.1454	53.257	1.20224	5.32778e-33	5.78211e-31
CD28	0.22261	0.53604	1.26782	9.26969e-26	3.68196e-24
TMEM156	0.187678	0.473146	1.33403	3.80445e-28	2.0168e-26
TDO2	0.261975	0.913924	1.80264	4.08866e-08	3.39893e-07
P2RX7	0.317732	0.724789	1.18975	2.00907e-24	6.87123e-23
VPREB3	1.39576	3.29132	1.23762	1.11866e-08	1.01437e-07
FOXI3	0.535009	0.210916	-1.34289	0.00025696	0.000887193
INHBA	0.926613	2.745	1.56677	7.71854e-21	1.8664e-19
TESPA1	0.157705	0.454558	1.52723	6.55856e-36	1.12996e-33
SUCNR1	0.141902	0.474948	1.74288	1.357e-10	1.51815e-09
TAGAP	0.508385	1.29034	1.34376	5.26338e-32	4.77271e-30
ARHGAP20	0.0700917	0.182181	1.37805	3.20894e-25	1.19215e-23
MFAP4	10.5576	23.2479	1.13882	1.13029e-26	4.92727e-25
CTSW	2.01435	5.654	1.48896	1.91943e-18	3.7902e-17
CCL17	0.586649	1.2422	1.08233	8.32551e-07	5.53015e-06
LRRTM2	0.0523498	0.290661	2.47308	0.00390896	0.00919563
ELFN1	0.607986	1.24127	1.0297	3.96239e-24	1.30032e-22
C16orf54	0.516352	1.31128	1.34455	7.82327e-24	2.45064e-22
APOL3	1.66196	3.81725	1.19965	1.2791e-24	4.48598e-23
HIC1	0.713023	1.92547	1.43319	6.81939e-45	4.94693e-42
RGS4	0.856998	1.75232	1.0319	2.236e-19	4.74866e-18
CD5	1.08673	2.79788	1.36434	1.01258e-27	5.0384e-26
OR2I1P	2.678	6.55836	1.29218	5.30966e-10	5.62946e-09
TLR10	0.110632	0.267707	1.27489	5.68988e-23	1.67931e-21
ZEB1	1.03407	2.5343	1.29325	7.903e-40	2.53319e-37
TEK	1.04878	2.17951	1.05529	1.74896e-26	7.44011e-25
IFFO1	0.740522	1.73267	1.22638	4.66085e-54	2.14135e-50
CDH11	1.73147	4.15935	1.26436	9.59672e-34	1.13053e-31
HOPX	0.827832	1.67941	1.02054	4.51047e-25	1.65781e-23
GNLY	2.91001	9.22284	1.66419	3.35086e-14	4.98757e-13
GPR22	0.0496306	0.29717	2.58199	4.05678e-13	5.52516e-12
SELE	0.223587	0.497996	1.1553	5.62872e-19	1.15619e-17
TNFRSF13B	0.0632907	0.202174	1.67553	2.22827e-18	4.37496e-17
XCL2	0.687741	1.56125	1.18276	3.46961e-16	5.8605e-15
CD200R1	0.134251	0.296001	1.14067	1.77293e-15	2.85805e-14
ASGR2	0.180642	0.532995	1.56099	1.19934e-18	2.3992e-17
SHISAL1	0.367097	0.963995	1.39286	1.51004e-21	3.89754e-20
MMP19	0.829658	1.98035	1.25517	1.73492e-41	6.29274e-39
PAMR1	4.21203	11.2141	1.41272	7.27509e-25	2.63182e-23
LILRB1	0.5839	1.49768	1.35893	9.36045e-36	1.51783e-33
SPARCL1	18.1222	46.7178	1.36621	3.05279e-29	1.80587e-27
BTBD17	0.684477	0.342092	-1.00062	0.0125001	0.024747
CLDN2	1.26624	3.4167	1.43206	0.000449062	0.0014354
CXCL11	2.60599	5.57384	1.09684	3.12651e-10	3.38779e-09
CCR2	0.243059	0.819151	1.75282	2.82246e-31	2.27497e-29
JAML	0.40202	1.07436	1.41813	4.36424e-33	4.77399e-31
BLK	0.0813754	0.205422	1.33592	5.51694e-15	8.66059e-14
POU2AF1	0.511798	1.37355	1.42426	1.92447e-17	3.55562e-16
DDC	0.860281	0.40822	-1.07546	0.00162749	0.0043246
ISLR	23.2774	66.739	1.5196	1.95744e-45	1.49886e-42
CTSK	10.5918	30.2719	1.51503	4.50123e-48	4.77234e-45
RASL12	1.98558	4.19164	1.07796	2.17563e-34	2.91133e-32
ACTA2	24.1829	92.4686	1.93497	7.18791e-43	3.19584e-40
DOCK2	0.395826	1.03014	1.3799	2.32089e-32	2.31803e-30
MUC7	0.192769	0.675763	1.80965	0.00348156	0.00832084
PI16	0.241563	0.602241	1.31794	0.000615599	0.00187137
ITGAM	0.991914	2.30551	1.2168	1.08983e-24	3.84173e-23
EVI2A	0.876933	2.27966	1.37828	1.54263e-28	8.47095e-27
INMT	0.524492	1.56368	1.57595	1.67863e-31	1.40222e-29
NCR3	0.27144	0.662919	1.2882	2.11542e-17	3.89277e-16
SGIP1	0.289614	0.622762	1.10455	2.69543e-21	6.80422e-20
ZNF676	0.0429752	0.113172	1.39695	5.91693e-07	4.03728e-06
RERG	0.70597	1.79866	1.34925	1.14562e-19	2.50637e-18
TAGLN	17.4284	62.7128	1.84732	3.81347e-39	1.14263e-36
TMEM119	1.71233	4.48342	1.38864	4.55076e-43	2.27342e-40
RETN	0.209775	0.634179	1.59605	4.48247e-11	5.29407e-10
SERPINA11	1.87068	3.80878	1.02577	0.00539395	0.0121439
SPI1	7.0229	15.4845	1.14069	6.76976e-30	4.38064e-28
TRAT1	0.124245	0.385426	1.63327	1.02614e-20	2.44694e-19
RASGRP2	0.427174	0.980356	1.19848	1.25686e-35	1.99119e-33
SLAMF6	0.562947	1.68262	1.57964	1.777e-25	6.84145e-24
CCL19	1.50503	6.62642	2.13843	8.04329e-25	2.88699e-23
PTGER3	0.179591	0.608724	1.76107	1.17701e-14	1.80856e-13
SCGB1D4	60.4104	136.725	1.17841	0.0165818	0.0314716
GMFG	4.33004	9.95834	1.20152	1.64442e-36	3.14792e-34
STX11	0.739378	1.4965	1.01721	6.55656e-23	1.92275e-21
SAMSN1	0.824917	1.98972	1.27025	2.98434e-25	1.11171e-23
GIMAP5	0.044296	0.146248	1.72316	2.50465e-32	2.44834e-30
TIGIT	0.438181	1.22774	1.48641	7.64092e-21	1.85087e-19
CD80	0.107486	0.255163	1.24727	2.68433e-15	4.27724e-14
CD33	0.208261	0.443621	1.09094	3.09857e-26	1.29026e-24
BNIPL	2.48494	1.22966	-1.01495	6.04049e-05	0.000251377
CD96	0.666189	1.43192	1.10395	4.86716e-23	1.44267e-21
CD300LF	0.550014	1.42408	1.37249	7.99291e-29	4.51501e-27
SH2D1A	0.367543	1.11223	1.59747	4.40699e-24	1.44279e-22
VGLL3	0.148409	0.412957	1.47641	1.88897e-28	1.02101e-26
BPIFA2	0.183115	0.0906075	-1.01505	0.0137885	0.0268921
COX7A1	2.68653	6.47611	1.26938	1.08473e-35	1.73847e-33
CST7	4.25172	13.3366	1.64927	5.17287e-30	3.42777e-28
KLRD1	0.0849265	0.216031	1.34695	9.82969e-15	1.51546e-13
CR1	0.0910455	0.186316	1.03309	4.16604e-14	6.14123e-13
VTN	0.192445	0.505153	1.39228	1.01218e-06	6.61039e-06
RGS18	0.157627	0.408466	1.3737	1.13615e-26	4.92727e-25
MYOCD	0.0539685	0.330874	2.61609	3.01827e-27	1.41499e-25
GIMAP8	0.796374	2.0255	1.34676	8.27328e-49	1.26701e-45
CORO1A	5.76158	13.7582	1.25576	1.77421e-26	7.52427e-25
FHL1	2.1812	4.89861	1.16725	3.66822e-23	1.09435e-21
DDR2	0.92621	2.22672	1.26551	2.23044e-33	2.56184e-31
IL18RAP	0.177609	0.403707	1.1846	3.79381e-21	9.40499e-20
SP140	0.316483	0.793714	1.32649	1.1367e-23	3.52865e-22
IL1RL1	0.0748244	0.201129	1.42654	2.82338e-10	3.07383e-09
MMP9	13.4075	45.8341	1.77338	2.06512e-10	2.28439e-09
DCN	3.44333	12.1858	1.82332	6.06379e-46	4.91631e-43
FCRL5	0.0837423	0.300243	1.8421	5.14463e-17	9.1025e-16
CD248	10.7773	22.0019	1.02963	2.48108e-25	9.34338e-24
CD163	2.10257	5.0307	1.25861	7.39843e-20	1.64738e-18
ACAP1	1.05949	2.13828	1.01308	3.53353e-23	1.05646e-21
S100A3	8.10047	18.6662	1.20435	0.000165369	0.000605708
PTCRA	0.08687	0.179748	1.04905	2.33509e-10	2.5645e-09
CACNA1H	0.936905	2.14238	1.19324	9.47037e-32	8.20944e-30
FGR	1.37638	3.01777	1.13261	7.69976e-31	5.99581e-29
GPR34	0.625323	1.48879	1.25147	8.36913e-23	2.43358e-21
NTM	0.35223	0.761428	1.11219	6.72939e-18	1.27757e-16
HMX2	0.324159	0.718998	1.14929	0.000675876	0.00202822
SLC39A5	1.0702	0.486002	-1.13885	0.0280141	0.0490499
KLHL4	0.0242076	0.0703101	1.53827	1.82027e-17	3.36762e-16
KCNA3	0.101118	0.294718	1.5433	6.46545e-23	1.90007e-21
LILRB2	0.830471	2.0915	1.33253	2.24428e-30	1.61952e-28
SIRPG	0.600826	1.88134	1.64674	2.8402e-22	7.79811e-21
PLEK	2.21577	5.12722	1.21037	2.88339e-23	8.69623e-22
CPZ	0.130029	0.328402	1.33663	3.54202e-21	8.84413e-20
SIRPB2	0.176071	0.432935	1.29799	1.32016e-26	5.68617e-25
VAMP5	12.9216	31.8178	1.30005	8.58375e-44	5.14391e-41
HPDL	2.59727	1.22829	-1.08035	2.08421e-05	9.76102e-05
DOK2	1.51546	4.07074	1.42554	5.07874e-30	3.38166e-28
IGSF1	1.83835	0.4147	-2.14827	0.00352512	0.00841036
CD3E	2.99791	8.84201	1.56042	3.29658e-27	1.52986e-25
C5orf46	0.148159	0.33059	1.1579	1.39367e-05	6.88741e-05
FASLG	0.399216	1.02322	1.35787	1.16973e-16	2.03566e-15
PLAC9	0.752401	1.96759	1.38685	4.0261e-13	5.48879e-12
UBASH3A	0.277897	0.75542	1.44273	2.29748e-27	1.09571e-25
DHH	0.0918558	0.282888	1.62279	3.20765e-32	3.07021e-30
TMIGD2	0.233088	0.499454	1.09948	1.19109e-12	1.57249e-11
CADM3	0.522665	1.32327	1.34015	6.67133e-14	9.63847e-13
JPH2	0.325517	1.03901	1.67441	2.04293e-17	3.7644e-16
COL3A1	59.3646	173.102	1.54395	8.52182e-42	3.35589e-39
COL9A3	5.14206	2.51433	-1.03217	0.0120054	0.0239431
IRF4	0.272271	0.978541	1.84559	8.3729e-26	3.34503e-24
TPSD1	0.290903	0.734146	1.33553	4.31318e-06	2.42945e-05
OR51E2	0.133882	0.279642	1.06262	1.60152e-12	2.09627e-11
CHRDL2	0.305914	1.70288	2.47678	1.57263e-15	2.54706e-14
ACKR1	2.70991	11.0572	2.02867	4.76505e-35	6.84132e-33
PPP1R16B	0.559433	1.17934	1.07594	1.01249e-29	6.46075e-28
HCST	4.65699	11.1402	1.25831	2.91013e-21	7.27956e-20
P2RY14	0.331272	1.00549	1.60181	1.99922e-19	4.27877e-18
FCGR1B	0.109486	0.27197	1.31269	2.50385e-22	6.90212e-21
PSTPIP1	0.755678	2.00035	1.40441	1.07605e-29	6.77226e-28
SLCO2B1	0.92973	2.38124	1.35683	3.19853e-35	4.64056e-33
TCF21	0.068297	0.288566	2.07901	7.57519e-24	2.37833e-22
PAX2	10.0926	3.29082	-1.61678	3.46026e-06	1.99218e-05
CADPS	0.0917409	0.222359	1.27725	4.91431e-12	6.22555e-11
LDB2	1.44216	3.21895	1.15835	1.85888e-29	1.11882e-27
ALOX5AP	3.64255	7.89396	1.1158	9.18127e-25	3.26148e-23
PTPRC	1.27775	3.65345	1.51565	8.42497e-27	3.75797e-25
TPSB2	1.38266	3.33588	1.27062	5.11927e-14	7.49033e-13
IRF8	1.14466	2.46133	1.10452	2.10885e-25	8.05161e-24
KRTAP1-5	0.0953209	0.310643	1.70439	1.9122e-05	9.08507e-05
SLC24A3	1.32341	2.68295	1.01956	1.05919e-19	2.33208e-18
CD6	0.850906	2.02502	1.25086	8.73153e-23	2.52829e-21
MEF2C	0.638152	1.37465	1.1071	8.66577e-40	2.71455e-37
SPON2	6.11426	13.4323	1.13546	8.34675e-31	6.39129e-29
LIPC	0.154187	0.374668	1.28093	0.000986196	0.00280501
SLC22A3	0.229882	0.679998	1.56464	1.84568e-19	3.96247e-18
HOXC5	0.127052	0.0623154	-1.02776	0.000264656	0.0009108
TIMP3	0.263982	0.635922	1.26841	2.68506e-09	2.64344e-08
KCNMB1	0.408165	1.54215	1.91772	1.03962e-37	2.38818e-35
WNT2	2.1844	6.18261	1.50098	2.32387e-37	4.92769e-35
ADH1B	0.109473	0.464977	2.08659	2.85681e-12	3.68684e-11
ITIH2	1.20786	2.75306	1.18858	0.0261081	0.046247
CXCR1	0.199611	0.497453	1.31737	2.03367e-08	1.77518e-07
APOB	0.0175842	0.519559	4.88493	0.00895012	0.0187093
ANO4	0.188108	0.55197	1.55303	9.06394e-21	2.16513e-19
FCRL3	0.0903265	0.277426	1.61888	2.65241e-18	5.16359e-17
CXorf36	1.02515	2.35004	1.19685	1.63461e-32	1.66888e-30
IGSF6	1.4483	3.57114	1.30202	8.95642e-29	5.01814e-27
COL5A1	6.52776	16.039	1.29692	1.85702e-32	1.86827e-30
CPED1	0.370777	1.18283	1.67362	1.70998e-40	5.89218e-38
ITGBL1	0.116296	0.284589	1.29108	7.62438e-20	1.69222e-18
CNN1	4.34997	22.3305	2.35994	5.55483e-28	2.88914e-26
FCER1G	17.8714	38.1758	1.09501	6.52656e-26	2.638e-24
MYO1F	1.42669	3.07641	1.10858	6.92071e-36	1.14925e-33
TNFRSF4	1.8966	4.03163	1.08794	3.75548e-21	9.34329e-20
MSR1	0.865113	1.78178	1.04236	5.59924e-17	9.88147e-16
TNMD	0.265383	0.607315	1.19437	0.0220906	0.0401629
AIF1	6.05691	15.0327	1.31145	9.47037e-32	8.20944e-30
CXCR6	0.659107	1.88762	1.51798	1.60836e-28	8.79684e-27
NXPH3	0.372838	0.87089	1.22394	2.53729e-25	9.52902e-24
TLR8	0.152196	0.587869	1.94956	1.92548e-22	5.39409e-21
CD8B2	0.560606	1.24033	1.14566	4.12186e-05	0.000178991
LRTM2	0.405574	0.200116	-1.01913	0.025615	0.0455374
AKT3	0.651831	1.50469	1.2069	2.6054e-36	4.66366e-34
HPR	0.167978	0.6587	1.97135	0.00995635	0.0205063
CD247	0.732591	1.89229	1.36905	8.2804e-27	3.70548e-25
HSPB3	0.147159	0.310953	1.07932	2.41474e-05	0.00011126
MMP11	27.3616	66.2973	1.2768	1.70759e-29	1.03682e-27
CCL18	3.96971	12.3912	1.64222	1.08763e-05	5.56657e-05
CAMK2A	0.03275	0.0740184	1.17639	9.19483e-15	1.42396e-13
CALHM6	3.04588	6.70976	1.1394	1.11474e-13	1.58234e-12
ITGAD	0.0826908	0.186636	1.17443	3.26397e-07	2.34553e-06
SELP	0.451483	1.5792	1.80645	4.60726e-40	1.51195e-37
GPR183	1.92472	4.28741	1.15546	8.38995e-28	4.23585e-26
SLC46A2	0.415157	0.953621	1.19976	0.000526764	0.00163744
RASAL3	1.16946	2.88487	1.30266	5.84838e-34	7.13347e-32
CCL21	5.62742	27.1213	2.26888	1.69501e-25	6.54407e-24
CD4	5.85427	12.0252	1.0385	3.81629e-29	2.22881e-27
ABCA6	0.0546354	0.132084	1.27354	1.932e-20	4.51335e-19
GDF3	0.477771	1.31417	1.45976	4.90308e-05	0.000208771
SPN	0.667541	1.54808	1.21355	9.77518e-28	4.88157e-26
POSTN	3.1369	8.49478	1.43724	4.67443e-15	7.38003e-14
FNDC1	1.00879	2.82293	1.48457	2.33803e-27	1.11121e-25
DIO2	3.233	8.4824	1.3916	1.22722e-20	2.90631e-19
LY86	1.38038	2.96901	1.10492	7.03203e-28	3.57647e-26
PTPN7	1.08836	2.20405	1.01801	9.91991e-26	3.92891e-24
TCEAL7	0.821862	2.57998	1.65039	6.36369e-29	3.63945e-27
MESP2	1.58722	0.692103	-1.19744	0.00496536	0.011312
THBD	2.06888	4.25961	1.04187	1.77979e-28	9.69597e-27
CNTN4	0.237071	0.631574	1.41363	1.30041e-25	5.09191e-24
KRT36	0.215797	0.721527	1.74138	1.37226e-06	8.71237e-06
FCGR2B	0.486088	0.980036	1.01162	4.714e-23	1.40028e-21
ADAMTS12	0.353204	0.753041	1.09223	1.27132e-16	2.20688e-15
TRPM5	0.497281	0.198901	-1.32201	0.00129034	0.00354295
MEI1	0.279787	0.774463	1.46887	3.79393e-21	9.40499e-20
EMILIN1	6.76541	20.267	1.58288	6.39168e-51	1.46828e-47
KLRC2	0.0784252	0.190774	1.28247	2.15187e-08	1.86889e-07
FOXL2NB	0.293289	0.792307	1.43374	1.67087e-20	3.93669e-19
HAVCR2	1.46958	3.47972	1.24357	9.06432e-29	5.05804e-27
RUNX1T1	0.146431	0.406825	1.47419	2.05657e-38	5.34824e-36
TMEM215	0.175352	0.504061	1.52335	1.73138e-20	4.07228e-19
PARP15	0.12967	0.307161	1.24415	5.46187e-20	1.23411e-18
SLC16A7	0.110096	0.222349	1.01406	1.27095e-22	3.61185e-21
LMOD1	1.61272	7.0939	2.13708	6.96743e-38	1.65573e-35
MMP28	0.26039	0.744669	1.51593	3.47366e-27	1.60662e-25
CPA5	0.0817525	0.176498	1.11032	5.86776e-08	4.76017e-07
IGLL1	0.200415	0.955834	2.25377	9.59435e-09	8.76335e-08
TLR7	0.215825	0.526316	1.28607	1.05555e-25	4.15675e-24
SLAMF8	2.08527	5.62213	1.43088	1.49418e-29	9.23511e-28
ZNF366	0.116892	0.301003	1.36461	1.22665e-19	2.6625e-18
SIT1	1.03961	2.78923	1.42382	8.56119e-22	2.25189e-20
COL1A1	84.0942	230.488	1.45461	1.1297e-31	9.67123e-30
IL21R	0.265188	0.789442	1.57382	2.68578e-31	2.19042e-29
CD79A	2.92103	8.92169	1.61084	2.31027e-15	3.68974e-14
GPR18	0.318456	0.840508	1.40017	1.9463e-18	3.83775e-17
NOL4	0.185193	0.0803925	-1.2039	0.00661252	0.0144552
DMRT3	1.44887	0.556366	-1.38083	0.0011866	0.00329339
NGB	0.151812	0.0726311	-1.06363	0.000507542	0.00158951
ZNF683	0.829389	2.15907	1.38029	4.05169e-18	7.78863e-17
TMEM200B	0.772411	1.85723	1.26571	2.88832e-30	2.0208e-28
COL15A1	3.99442	11.0407	1.46677	4.61844e-43	2.27342e-40
TEX19	0.23479	0.113863	-1.04408	0.00741377	0.0159538
DPEP2	0.279227	0.606974	1.1202	2.47663e-30	1.76867e-28
RAMP1	16.6593	34.5785	1.05355	1.07482e-18	2.16267e-17
C1orf162	1.90959	3.97078	1.05616	2.89511e-31	2.30655e-29
RORB	0.179713	0.483392	1.4275	5.77536e-13	7.78883e-12
IKZF1	0.49529	1.18171	1.25453	2.85303e-30	2.00629e-28
HTRA4	0.162454	0.394188	1.27885	6.45461e-15	1.00981e-13
IL16	0.413281	1.00011	1.27496	2.81862e-35	4.13288e-33
LSP1	4.7659	9.9628	1.0638	3.67652e-26	1.50814e-24
NKG7	7.3063	24.9065	1.76931	1.94704e-22	5.44342e-21
XPNPEP2	0.062379	0.186536	1.58032	6.64154e-10	6.98249e-09
PTGFR	0.0796844	0.23587	1.56562	1.13747e-15	1.86418e-14
AOAH	0.823368	2.07741	1.33518	1.27662e-34	1.74214e-32
COL6A2	55.4603	120.329	1.11746	1.687e-29	1.02885e-27
ICOS	0.228101	0.61564	1.43241	1.0467e-21	2.73751e-20
BMPER	0.134058	0.325176	1.27836	8.07029e-05	0.000324957
SRPX2	1.80657	4.41486	1.28911	1.60394e-37	3.56567e-35
SLAMF7	1.26399	4.3116	1.77023	1.16784e-23	3.61715e-22
PDCD1	1.04902	3.04222	1.53608	7.96493e-16	1.31474e-14
CD7	2.89679	7.76747	1.42299	2.60067e-21	6.60129e-20
CYP4F22	0.112827	0.25656	1.18519	2.13831e-12	2.78041e-11
ASPN	1.23271	5.75779	2.22369	1.06834e-34	1.47249e-32
FOXL2	0.818292	2.05027	1.32513	3.60282e-22	9.81378e-21
MYL9	42.3914	87.8547	1.05135	2.39494e-24	8.13042e-23
GYPC	1.83628	5.39695	1.55536	8.26761e-56	5.69762e-52
GIMAP7	2.38457	6.3186	1.40588	3.42114e-34	4.47769e-32
TRPV2	1.91399	4.56409	1.25374	2.43104e-42	1.01537e-39
SLFN12L	0.101242	0.218427	1.10934	5.36468e-15	8.46011e-14
FUT7	0.150552	0.349599	1.21544	3.30242e-19	6.91751e-18
TSHZ3	0.624646	1.7595	1.49405	6.09269e-44	3.99884e-41
FREM3	0.184892	0.0454581	-2.02407	0.0222423	0.0403961
DMBT1	2.37687	6.38256	1.42507	0.0172052	0.0325383
OLFML2B	4.55416	12.0264	1.40094	1.49171e-44	1.02801e-41
CCL11	0.348404	0.894732	1.36069	3.87043e-09	3.72789e-08
XCR1	0.062975	0.150665	1.25849	1.47816e-21	3.82242e-20
NEXN	0.618986	1.5004	1.27737	2.73809e-22	7.53277e-21
SIGLEC9	0.498315	1.03863	1.05955	3.65563e-26	1.50405e-24
GPR174	0.145084	0.431431	1.57224	2.25663e-17	4.14155e-16
CCR4	0.18558	0.510265	1.4592	2.1382e-25	8.14111e-24
ATP8B4	0.117641	0.244723	1.05676	7.58287e-20	1.68572e-18
BATF	3.79842	7.72297	1.02376	2.94985e-16	5.01948e-15
CCL23	0.120293	0.440333	1.87204	4.17677e-18	8.00674e-17
CLMP	0.85076	2.22849	1.38924	4.96739e-34	6.3394e-32
GZMH	1.60156	5.61409	1.80957	8.58213e-21	2.06076e-19
ARHGAP15	0.302658	0.659729	1.12419	3.93682e-33	4.3409e-31
PPP1R12B	1.14641	2.66205	1.21542	5.94217e-16	9.91537e-15
WIPF1	2.35729	4.94045	1.06751	2.72006e-40	9.14404e-38
GNG13	0.473937	0.20523	-1.20745	0.00412943	0.00963696
CD53	7.05434	17.4745	1.30867	3.43889e-38	8.61787e-36
UPP2	0.0881362	0.206296	1.22691	0.000858767	0.00249292
CD1E	0.288264	0.600743	1.05936	3.13986e-12	4.037e-11
MYOD1	0.370615	0.173151	-1.09789	2.90631e-05	0.000130993
ARHGAP36	0.182764	0.0596847	-1.61455	0.00218097	0.00554761
STAB1	3.50586	7.01606	1.00089	2.83493e-37	5.92028e-35
CD209	0.300047	0.742396	1.307	1.0842e-16	1.89158e-15
GPR84	0.719236	1.47011	1.03139	3.43634e-20	7.85457e-19
ACTL8	3.44716	1.24956	-1.46399	4.88174e-05	0.000207991
SVEP1	0.469046	1.22199	1.38144	7.93572e-35	1.1161e-32
CXCL9	6.08615	20.2863	1.73691	8.10092e-15	1.26021e-13
ADAMDEC1	1.21726	3.64502	1.58229	5.68497e-14	8.27412e-13
NPTX1	0.138284	0.544111	1.97627	1.41181e-15	2.29468e-14
FGF1	0.517259	1.16311	1.16903	3.52709e-19	7.34348e-18
FGF7	0.2667	0.53772	1.01164	1.67354e-30	1.2335e-28
SULF1	5.75074	14.0961	1.29347	2.58682e-31	2.12227e-29
VIPR2	0.146711	0.386559	1.39771	2.44752e-24	8.26819e-23
MYCT1	0.739468	1.50385	1.0241	1.10281e-21	2.87336e-20
GEM	3.1461	7.62998	1.27811	5.95695e-29	3.42103e-27
GRID1	0.179734	0.362126	1.01062	1.21449e-31	1.03329e-29
GUCY1A2	0.301731	0.86047	1.51186	2.7936e-21	7.03916e-20
GBX1	0.154686	0.0677364	-1.19134	0.0081947	0.0173419
ADRB3	0.0173821	0.0366632	1.07673	0.00385082	0.00908057
UNC5D	0.0236031	0.183744	2.96065	3.40946e-12	4.3714e-11
RHOH	0.293577	0.776905	1.404	3.18955e-32	3.07021e-30
LRRN4CL	0.967852	2.52344	1.38253	9.50949e-27	4.17418e-25
RCSD1	0.782697	1.76769	1.17534	6.05964e-39	1.77702e-36
PLA2G2D	0.837815	3.79924	2.18101	6.55988e-16	1.08934e-14
MZB1	3.57862	9.9598	1.47671	1.93333e-17	3.56722e-16
MCEMP1	0.233698	0.509798	1.12528	4.95047e-09	4.71544e-08
CYSLTR2	0.193712	0.412139	1.08922	6.72744e-21	1.63824e-19
LCK	1.8154	3.89481	1.10126	6.12709e-24	1.95034e-22
ABCA9	0.144996	0.33096	1.19064	3.27195e-18	6.33388e-17
VSIG4	2.90662	6.75863	1.21739	1.0582e-21	2.76235e-20
ADAMTSL1	0.546047	1.25198	1.19712	1.11131e-18	2.23283e-17
CCR5	0.936315	2.49377	1.41326	9.27486e-31	7.02392e-29
TNIP3	0.177408	0.39771	1.16465	1.07221e-10	1.21332e-09
TRAF3IP3	0.257849	0.638229	1.30755	1.93974e-27	9.34805e-26
ITGA8	0.270008	0.663445	1.29697	5.6665e-25	2.06617e-23
ADAM12	0.636367	1.81598	1.51281	6.16049e-24	1.95645e-22
LAX1	0.215574	0.587149	1.44554	2.9343e-19	6.16516e-18
GAPT	0.207064	0.426276	1.04171	6.72318e-22	1.78891e-20
CXCL12	1.88159	5.95824	1.66293	5.23565e-43	2.48838e-40
ABCA8	0.150431	0.42853	1.5103	1.2576e-22	3.58129e-21
HSPB7	0.476295	1.58159	1.73145	4.714e-23	1.40028e-21
LGI4	0.283551	0.645286	1.18633	9.81013e-23	2.82873e-21
ODAM	1.21364	9.94763	3.03501	2.58538e-09	2.55078e-08
FAM69C	0.172079	0.34612	1.0082	4.96307e-13	6.71305e-12
FCGR3A	5.62614	14.1484	1.33042	7.9561e-21	1.92047e-19
GZMM	1.09556	3.31086	1.59554	2.9656e-24	9.89706e-23
AC136428.1	0.186012	0.518131	1.47792	9.0616e-10	9.42611e-09
LGALS7B	5.18949	2.02225	-1.35963	0.00156761	0.00418646
IL7R	0.771226	2.24631	1.54233	6.40758e-30	4.18558e-28
CCL3	1.70692	3.6065	1.0792	2.28115e-09	2.26195e-08
CD3G	0.371695	1.01353	1.44719	5.08411e-28	2.66442e-26
CXorf21	0.303915	0.673063	1.14707	6.4674e-24	2.0492e-22
NEFL	0.291914	0.634191	1.11938	3.28706e-05	0.0001461
S1PR4	0.975886	2.53008	1.3744	3.89197e-26	1.59178e-24
KIAA1755	0.260749	0.794298	1.60702	6.8772e-43	3.15962e-40
APOC2	0.088348	0.182006	1.04271	1.04523e-09	1.07511e-08
FGF3	3.11197	7.56912	1.2823	0.0249405	0.0445509
CACNA1G	0.160386	0.336418	1.06871	2.0616e-07	1.52933e-06
GZMK	0.670405	2.50374	1.90098	3.49245e-30	2.37125e-28
OMD	0.0789634	0.415497	2.39558	1.11233e-17	2.08588e-16
SIGLEC12	0.220698	0.46267	1.06791	4.13452e-09	3.97115e-08
OLFML1	0.989916	2.52034	1.34824	1.62305e-38	4.38637e-36
WAS	3.02945	6.30638	1.05776	5.39331e-28	2.81576e-26
KCTD8	0.0412327	0.0869487	1.07638	1.98441e-08	1.73548e-07
MS4A6A	1.7179	4.21597	1.29522	4.84957e-37	9.68719e-35
MRC1	0.386145	1.3003	1.75163	2.46421e-19	5.20924e-18
TNFSF8	0.348755	0.791096	1.18164	2.88234e-27	1.35588e-25
KLRB1	0.821777	2.2615	1.46046	2.33654e-24	7.95172e-23
SASH3	2.43924	6.12411	1.32807	1.35465e-34	1.8305e-32
CBLN4	0.0658435	0.158232	1.26493	9.39684e-09	8.59434e-08
NCKAP1L	0.934231	2.17674	1.22032	5.66057e-34	7.0288e-32
PTGDR	0.0816512	0.188415	1.20637	8.09743e-31	6.27005e-29
BIN2	0.951054	1.94903	1.03516	4.25346e-29	2.47365e-27
CYP7B1	0.220925	0.451861	1.03232	9.98082e-20	2.20458e-18
AIM2	0.488287	0.977142	1.00084	1.07749e-14	1.65934e-13
TRPC4	0.233766	0.472602	1.01556	3.08327e-27	1.44057e-25
COL6A3	6.5014	15.899	1.29012	2.14423e-38	5.47296e-36
SELL	1.25252	3.53662	1.49754	1.0453e-22	3.00154e-21
LMO1	1.50822	0.583213	-1.37075	0.000199043	0.000711096
GDF7	0.291407	0.801401	1.45949	5.39564e-22	1.4488e-20
GZMB	4.03286	13.5534	1.74878	6.50518e-15	1.01656e-13
SRGN	20.0324	43.0271	1.10291	1.81995e-30	1.33427e-28
CD27	1.55901	5.1002	1.70992	1.89556e-25	7.27759e-24
GRAP2	0.19333	0.471218	1.28533	1.28038e-27	6.30265e-26
DACT3	0.530647	1.40263	1.40231	1.2289e-27	6.07096e-26
FPR3	1.76652	4.26205	1.27064	6.99516e-22	1.85769e-20
JCHAIN	21.2498	73.3663	1.78767	1.42824e-16	2.46994e-15
PTGIS	0.673552	2.62049	1.95998	2.23599e-19	4.74866e-18
APBB1IP	1.06081	2.48648	1.22893	3.69098e-32	3.48444e-30
TCF23	0.145723	0.708756	2.28206	8.82403e-11	1.00514e-09
FPR2	0.0937831	0.20126	1.10166	2.13455e-10	2.35176e-09
GIMAP4	4.18877	9.61618	1.19894	7.99928e-38	1.86871e-35
IGLL5	10.5475	26.8557	1.34833	4.01925e-17	7.16921e-16
CCL5	13.4021	39.6675	1.5655	1.66725e-22	4.68974e-21
PLD4	0.303308	0.612973	1.01504	9.22531e-19	1.8644e-17
TYROBP	29.1029	65.6575	1.17379	9.77518e-28	4.88157e-26
CTSG	0.0857916	0.256991	1.58281	1.04329e-05	5.36156e-05
CD300LB	0.121988	0.25051	1.03812	8.3016e-26	3.32619e-24
ZCCHC24	1.97671	4.12643	1.06179	5.66257e-38	1.36925e-35
IFNG	0.248748	0.833579	1.74464	2.85768e-10	3.10626e-09
GRP	1.23027	2.72857	1.14916	3.1357e-10	3.39508e-09
DPP6	0.197453	0.919393	2.21918	7.07584e-24	2.22663e-22
PRKG1	0.258089	0.5985	1.21348	1.2807e-21	3.33055e-20
PRELP	1.93342	4.63057	1.26003	1.0343e-22	2.97616e-21
PLN	0.432705	2.42633	2.48732	6.8434e-27	3.07252e-25
RGS9BP	0.185599	0.0920389	-1.01188	0.000269875	0.000925524
CCL4L2	1.42902	3.41258	1.25583	1.36839e-14	2.08635e-13
MASP1	0.144387	0.617598	2.09673	7.84705e-18	1.48159e-16
MSRB3	1.32044	3.1025	1.23241	2.87705e-31	2.30549e-29
P2RY12	0.0543587	0.179923	1.7268	5.61999e-15	8.81233e-14
CD52	10.0236	23.8001	1.24757	5.31886e-24	1.72089e-22
LAPTM5	27.0898	61.1151	1.17378	4.45274e-37	9.02532e-35
MYLK	1.75277	4.77541	1.44599	6.73554e-32	5.98942e-30
PDE2A	0.266821	0.656595	1.29913	2.60026e-24	8.72006e-23
SCRG1	0.035487	0.130379	1.87735	8.69697e-11	9.92304e-10
MS4A1	0.145348	0.548054	1.9148	2.72263e-17	4.93114e-16
PLXNC1	0.991554	2.20998	1.15627	1.06131e-34	1.47249e-32
RAMP3	9.41728	24.6636	1.389	2.09833e-29	1.25745e-27
CCL3L1	0.697069	1.46406	1.0706	6.30599e-11	7.29157e-10
LST1	2.19634	5.07191	1.20743	9.21753e-31	7.01908e-29
SIGLEC14	0.595302	1.236	1.05399	6.76967e-16	1.12147e-14
MARCO	1.25207	3.16345	1.33718	8.15821e-05	0.00032821
ASPA	0.0246044	0.0578669	1.23382	1.9118e-11	2.31753e-10
GREM1	0.284519	0.639929	1.16939	1.824e-20	4.27554e-19
PDLIM3	0.436395	1.75677	2.00922	1.03198e-25	4.07559e-24
REM1	0.661522	1.36986	1.05017	2.28912e-26	9.6192e-25
CTSE	1.49593	3.32932	1.15418	9.62167e-05	0.000380314
DPT	0.682519	2.09692	1.61933	2.56115e-29	1.52815e-27
GBP5	1.59442	4.30502	1.43299	1.70677e-14	2.58794e-13
SNX20	0.516097	1.32872	1.36432	6.12175e-34	7.40142e-32
ZAP70	1.18647	2.65773	1.16352	1.32215e-24	4.59024e-23
WFDC1	0.508009	1.16656	1.19934	3.8133e-21	9.43604e-20
TUBA3D	1.64715	3.97797	1.27206	0.00373458	0.00884124
GZMA	5.50212	13.6096	1.30656	3.45951e-19	7.21369e-18
WISP1	0.539179	1.4501	1.42732	4.49324e-30	3.02099e-28
TNFRSF9	0.317936	0.715094	1.1694	2.22515e-19	4.74023e-18
CD93	3.62318	7.65649	1.07943	8.6367e-36	1.41714e-33
POU2F3	0.695165	0.326307	-1.09113	0.00108819	0.00305468
HLA-DQA1	5.7264	15.1724	1.40575	3.79455e-25	1.40215e-23
ADAMTS2	1.74841	4.64967	1.41108	3.36419e-37	6.92068e-35
IL2RA	0.507556	1.18879	1.22785	4.83721e-22	1.30728e-20
CXCL13	3.44362	12.9135	1.90689	3.50564e-09	3.4003e-08
EHD2	7.69792	16.8287	1.12838	1.76592e-37	3.86344e-35
ZEB2	0.344085	0.892661	1.37535	1.16034e-48	1.5993e-45
UTS2	0.0785246	0.161842	1.04337	0.000471251	0.00149213
LEFTY2	2.85412	7.18442	1.33183	1.3898e-07	1.06268e-06
LILRA1	0.109455	0.241893	1.14403	8.58e-25	3.06368e-23
LAMA2	0.670813	1.67643	1.32141	3.04022e-22	8.31417e-21
IL2RB	2.22096	5.41802	1.28659	5.16089e-23	1.52645e-21
C1S	12.7833	27.5907	1.10992	5.61902e-36	9.8034e-34
CD84	0.423967	1.16722	1.46106	3.62942e-28	1.93893e-26
CD38	0.671607	1.60969	1.2611	2.41359e-14	3.62776e-13
CSDC2	0.779909	2.11642	1.44025	1.33682e-24	4.62948e-23
DES	7.08128	47.1278	2.73449	9.32644e-17	1.6313e-15
SIGLEC10	0.896024	2.49026	1.47469	1.74305e-31	1.43859e-29
BCHE	0.227524	0.553009	1.28129	1.04029e-05	5.34811e-05
FCN1	0.360774	0.74046	1.03733	4.29316e-16	7.18987e-15
TIFAB	0.0502433	0.172493	1.77954	6.59694e-24	2.08545e-22
CSF1R	4.0788	9.68524	1.24764	2.12701e-36	3.9617e-34
CCR8	0.148581	0.321751	1.1147	8.40408e-08	6.66859e-07
TWIST2	2.47297	5.63694	1.18867	1.09398e-16	1.90623e-15
APOC1	20.8902	45.3374	1.11787	3.37244e-09	3.27802e-08
SGCA	0.262373	0.798239	1.6052	1.65619e-25	6.41214e-24
FAM131B	0.191972	0.407054	1.08433	6.13922e-30	4.02938e-28
ADGRL4	2.04013	4.14589	1.02302	1.9929e-28	1.07297e-26
ITGAL	1.63478	3.898	1.25364	5.45018e-25	1.99257e-23
CYBB	3.06265	7.97118	1.38001	1.05428e-24	3.72595e-23
GGT5	1.46603	4.18577	1.51358	7.62673e-52	2.10238e-48
GPR65	0.326381	0.78774	1.27116	1.85394e-30	1.352e-28
HK3	0.890655	1.95443	1.13381	3.62324e-14	5.38137e-13
CCBE1	0.207991	0.439061	1.0779	1.02883e-09	1.05982e-08
MEDAG	0.462927	1.14255	1.3034	1.32944e-23	4.10845e-22
CCR7	0.958493	2.43802	1.34687	6.25029e-28	3.21447e-26
TBX21	0.268952	0.700458	1.38095	6.87759e-23	2.01261e-21
GLI1	0.537896	1.08696	1.01491	1.26809e-26	5.47904e-25
TNFRSF17	0.444798	1.45103	1.70586	9.46594e-15	1.46266e-13
KIR2DL4	0.239128	0.52846	1.14401	9.94038e-08	7.76691e-07
CLDN5	3.69933	8.06701	1.12477	4.85013e-19	1.00074e-17
GPIHBP1	0.183639	0.405899	1.14425	1.0695e-13	1.52125e-12
MAMDC2	0.254861	0.915156	1.84431	4.38973e-13	5.96682e-12
F13A1	1.89679	4.24536	1.16233	3.28739e-18	6.35485e-17
TNFAIP8L3	0.947122	1.92217	1.02111	8.97527e-09	8.23062e-08
CD68	0.208921	0.419169	1.00458	2.22205e-06	1.3374e-05
CD3D	3.92444	12.5055	1.67201	8.92519e-27	3.96825e-25
SLAMF1	0.217978	0.648413	1.57273	1.69975e-31	1.41131e-29
FCRLA	0.0805402	0.313023	1.95849	3.89985e-17	6.97168e-16
CD2	3.71259	10.6533	1.5208	5.18407e-27	2.35816e-25
GIMAP6	1.22804	3.23863	1.39903	1.39018e-48	1.64769e-45
PDCD1LG2	0.402502	0.939655	1.22313	3.53277e-26	1.46663e-24
TNXB	0.261949	1.05427	2.00888	2.4964e-21	6.36006e-20
MEIS3	0.822738	2.11589	1.36276	1.38959e-40	4.91095e-38
GPR25	0.196624	0.480104	1.28791	1.60696e-08	1.42527e-07
FBN1	1.34436	3.2361	1.26734	2.45771e-32	2.41961e-30
PPP1R1A	2.65606	1.08229	-1.29521	0.0199768	0.0368695
MUM1L1	0.324087	0.943479	1.54161	7.89973e-14	1.13774e-12
SLA2	0.59471	1.36778	1.20158	2.35206e-22	6.50973e-21
P2RY8	0.336793	0.951068	1.49769	5.86712e-33	6.26872e-31
ABI3	2.87016	6.55796	1.19212	3.95505e-43	2.09663e-40
C7	0.215045	1.23396	2.52058	3.42049e-19	7.14313e-18
KRT71	0.122327	1.76719	3.85265	0.000974359	0.0027793
FOXS1	2.59718	6.06199	1.22285	3.94081e-24	1.29633e-22
CLEC3B	1.02528	3.04035	1.56821	4.13813e-18	7.94371e-17
AQP1	9.24522	21.0943	1.19007	2.06068e-35	3.08721e-33
MAGEA8	0.891094	0.344522	-1.37098	0.00895238	0.0187097
P2RY13	0.361825	1.00799	1.47812	5.58765e-28	2.89529e-26
PAGE4	0.305665	1.01246	1.72784	3.18812e-13	4.40299e-12
EDIL3	1.02223	2.64595	1.37207	2.1567e-25	8.16642e-24
HSD11B1	0.436696	1.58728	1.86186	7.1116e-20	1.59122e-18
CLEC4E	0.588187	1.31213	1.15756	4.83978e-11	5.68694e-10
PMCH	0.254649	1.4318	2.49125	0.0104423	0.0213635
MS4A2	0.051088	0.12387	1.27777	1.73325e-10	1.92656e-09
PTGER1	1.48714	0.662813	-1.16587	0.0281273	0.049233
THBS2	3.06961	10.3016	1.74675	2.95542e-32	2.86863e-30
LILRB4	1.18434	3.17973	1.42482	9.70686e-23	2.80481e-21
COL1A2	59.5131	126.917	1.09261	1.61827e-27	7.93758e-26
CRTAM	0.173078	0.46853	1.43672	4.28492e-19	8.88107e-18
PLA2G5	0.0639441	0.15452	1.27291	3.82059e-10	4.0821e-09
ADGRA2	1.95684	4.66113	1.25215	1.75345e-32	1.77704e-30
ICAM3	0.216119	0.510934	1.24131	1.00863e-24	3.57377e-23
CXCR3	1.34881	3.9761	1.55967	4.61637e-24	1.50419e-22
IL2RG	5.39465	13.7954	1.35458	1.72239e-24	5.90539e-23
MNDA	1.1007	2.54894	1.21148	2.43776e-26	1.02127e-24
ECM1	8.34632	20.6862	1.30946	1.12314e-25	4.41032e-24
FILIP1L	2.423	6.50915	1.42567	6.95169e-32	6.142e-30
UPK1A	0.845478	0.413522	-1.0318	0.0137565	0.0268411
CD1B	0.102937	0.221637	1.10643	7.23215e-08	5.80214e-07
CCL4	1.88968	4.79972	1.34481	1.26991e-18	2.52935e-17
C1QTNF7	0.254108	0.71833	1.49921	1.49693e-23	4.6157e-22
SCML4	0.0774193	0.184041	1.24926	4.30867e-26	1.75181e-24
ZBTB16	0.0373119	0.123286	1.7243	4.62681e-11	5.44589e-10
LTA	0.253582	0.598995	1.2401	4.86355e-18	9.28453e-17
MMRN1	0.831478	2.08348	1.32524	7.04816e-16	1.16481e-14
AQP4	0.157123	0.0783151	-1.00453	0.000110166	0.000426763
STMN2	0.545311	1.24029	1.18552	5.23313e-11	6.12294e-10
MSC	1.37948	3.79944	1.46166	2.11267e-36	3.9617e-34
NEGR1	0.0811462	0.224385	1.46738	4.40806e-16	7.37333e-15
OPRK1	1.08621	0.535258	-1.02099	2.84092e-06	1.67406e-05
MRGPRF	1.60434	5.65728	1.81813	9.09779e-42	3.48319e-39
ITK	0.188979	0.524084	1.47157	1.08648e-27	5.38667e-26
FPR1	0.932206	2.27059	1.28435	7.05678e-24	2.22571e-22
ECSCR	1.43088	3.19885	1.16065	4.89556e-30	3.27551e-28
SLC7A3	0.408274	0.97005	1.24852	1.76069e-13	2.46622e-12
IL12RB1	0.425696	1.10451	1.37552	2.9088e-29	1.72811e-27
TFEC	0.176978	0.469936	1.4089	6.28843e-19	1.28787e-17
LILRB5	0.107914	0.273526	1.3418	2.52465e-10	2.75961e-09
MRVI1	1.01775	3.22283	1.66294	2.3569e-53	8.12127e-50
RSPO1	0.257223	1.26082	2.29327	9.44895e-27	4.16086e-25
TMEM200A	1.12715	2.30916	1.03469	5.73997e-24	1.83986e-22
ACTG2	3.84746	22.4772	2.54649	1.02417e-30	7.6718e-29
CMKLR1	0.701035	2.07462	1.56529	8.58375e-44	5.14391e-41
FCGR1A	0.681609	1.69802	1.31684	8.58964e-28	4.32084e-26
ALDH1A2	1.22882	2.60503	1.08403	1.0121e-15	1.66664e-14
CYTIP	1.35357	2.77875	1.03766	3.55296e-26	1.47058e-24
UGT3A2	0.794432	0.384691	-1.04622	0.000643477	0.00194497
LCP2	1.25369	2.93557	1.22746	2.29302e-34	3.03891e-32
CLEC2B	1.29326	3.29617	1.34978	1.43454e-48	1.64769e-45
LUM	26.6908	79.5763	1.576	1.39229e-38	3.91632e-36
ABCB1	0.741364	1.55997	1.07327	2.68168e-21	6.79442e-20
GJA4	6.62225	13.2909	1.00505	4.23283e-20	9.62723e-19
NPW	6.21938	2.49185	-1.31955	0.00155796	0.00416231
PRLHR	0.0156249	0.0767641	2.29659	0.00131944	0.00361046
CCL14	0.0367831	0.147837	2.0069	1.9684e-14	2.97483e-13
GIMAP1	0.508402	1.31996	1.37645	7.18799e-47	7.07658e-44
PEAK3	0.108153	0.219597	1.02179	2.43443e-24	8.24415e-23
CEACAM4	0.131048	0.383965	1.55088	6.63581e-28	3.38746e-26
ADGRE2	0.300773	0.623606	1.05196	6.32441e-28	3.2405e-26
CD48	1.3902	3.85357	1.4709	4.16367e-32	3.87756e-30
THBS1	7.92391	21.4043	1.43362	2.03336e-35	3.07977e-33
PRF1	2.11474	6.39998	1.59759	5.96274e-24	1.90683e-22
PDGFRB	7.13937	17.4848	1.29223	1.33118e-43	7.33904e-41
IL10RA	1.20765	2.9343	1.28081	6.20217e-34	7.43343e-32
KLRC1	0.102967	0.264718	1.36228	7.77637e-15	1.21109e-13
BCL2A1	1.99687	4.21815	1.07887	1.25928e-17	2.35185e-16
ELANE	0.059508	0.119525	1.00616	1.48918e-05	7.27852e-05
ARHGAP9	1.00483	2.35652	1.2297	3.30639e-30	2.29005e-28
TCL1A	0.147643	0.373717	1.33984	4.73571e-14	6.95866e-13
SH2D3C	2.01877	4.07183	1.0122	4.97188e-32	4.53824e-30
FAT3	0.0836445	0.216359	1.37109	8.17597e-05	0.000328828
DIO3	0.285734	0.668812	1.22692	1.30411e-24	4.56208e-23
MYL2	0.0560859	0.173257	1.6272	0.0141033	0.0274131
TNFAIP8L2	2.03621	4.51979	1.15037	1.66663e-33	1.93035e-31
CLECL1	0.155111	0.320431	1.04671	8.95108e-15	1.38933e-13
ABCC9	0.180685	0.48178	1.4149	1.2791e-24	4.48598e-23
CYTH4	1.11609	2.62126	1.23181	2.37013e-36	4.29836e-34
SLA	0.839037	2.11091	1.33106	1.43677e-35	2.25034e-33
CD14	25.6523	52.2501	1.02635	2.64082e-26	1.10298e-24
FCER2	0.0630122	0.149569	1.24711	2.72794e-09	2.67991e-08
DBH	0.554074	1.19782	1.11226	2.52295e-07	1.84672e-06
FOLR2	2.31166	4.99861	1.1126	1.53433e-24	5.27374e-23
LRRC15	0.252506	1.23581	2.29107	1.36155e-08	1.2178e-07
SIGLEC7	0.282676	0.648862	1.19876	1.30456e-22	3.69973e-21
SIGLEC1	0.986061	2.0545	1.05904	1.72138e-11	2.09777e-10
TMEM114	0.232193	0.497013	1.09796	5.27461e-09	5.00689e-08
CACNA2D2	2.41211	1.19593	-1.01217	0.0086073	0.0181177
C1QA	41.595	116.195	1.48207	6.06114e-27	2.74805e-25
COL5A2	7.77747	15.9063	1.03223	2.93009e-23	8.81778e-22
SERTM2	0.125765	0.947021	2.91267	2.31953e-16	3.98629e-15
DACT1	1.11542	2.29451	1.0406	3.32674e-24	1.10222e-22
EVI2B	1.71191	4.56167	1.41395	3.38267e-29	1.98397e-27
EDNRA	1.6799	4.14611	1.30338	1.1059e-38	3.17556e-36
CLEC12A	0.107889	0.32093	1.57271	6.02401e-15	9.4351e-14
LAG3	2.02601	5.83654	1.52647	3.25567e-14	4.85638e-13
ITGA11	0.644406	2.313	1.84372	6.92071e-36	1.14925e-33
MPEG1	1.85818	4.89772	1.39822	2.06804e-37	4.45373e-35
PABPC5	0.0753249	0.155803	1.04852	1.246e-22	3.55562e-21
THEMIS	0.120126	0.359283	1.58057	6.18309e-20	1.39251e-18
COL11A1	0.297318	0.853279	1.52101	5.92318e-07	4.03954e-06
MMP13	0.0837029	0.267917	1.67844	0.0257679	0.0457324
LILRA5	0.457162	1.08862	1.25173	1.53592e-18	3.04599e-17
PROK1	0.139284	0.488072	1.80907	0.00209024	0.005352
TMEM204	5.33211	11.2086	1.07183	1.62045e-35	2.48162e-33
JPH4	0.229267	0.660196	1.52587	8.91598e-17	1.56149e-15
A2M	38.1018	80.7399	1.08342	3.87908e-50	6.68316e-47
TAL1	0.140239	0.281535	1.00542	2.26727e-22	6.28767e-21
SERPIND1	0.291909	2.41573	3.04887	8.00924e-05	0.000322782
RGS1	4.82046	10.2394	1.08689	2.55985e-16	4.38836e-15
AXL	3.43551	7.18098	1.06366	1.04939e-43	6.02653e-41
DCSTAMP	0.0930246	0.230735	1.31055	5.22371e-11	6.11711e-10
COL8A1	1.0971	2.70518	1.30203	2.62896e-17	4.76776e-16
LYZ	14.966	43.3011	1.53271	4.57763e-19	9.4735e-18
PAPPA	0.0977804	0.237437	1.27993	4.89874e-20	1.11052e-18
CD37	2.12917	5.11565	1.26462	4.2168e-32	3.90068e-30
CCDC80	2.70725	7.04926	1.38064	1.10613e-37	2.49931e-35
TCEAL6	0.0256562	0.0906529	1.82104	7.04522e-05	0.000288314
BTK	0.447609	1.00795	1.17111	1.00351e-28	5.57714e-27
SELPLG	4.26456	9.50965	1.15699	1.60862e-30	1.19202e-28
PCDHGA12	0.0765651	0.163694	1.09624	6.47986e-16	1.07865e-14
CD40LG	0.214519	0.576166	1.42538	4.04731e-26	1.65042e-24
APOD	5.40149	20.3353	1.91255	2.92242e-18	5.68119e-17
FLNC	1.24192	3.22789	1.37802	5.59924e-17	9.88147e-16
GSTM5	0.149471	0.436472	1.54603	1.76654e-27	8.62396e-26
CD244	0.213574	0.472671	1.1461	2.93607e-18	5.69971e-17
GLIPR1	1.05129	2.22897	1.08421	1.06747e-31	9.19555e-30
P2RY10	0.236074	0.669083	1.50295	2.73777e-23	8.29334e-22
C1QTNF1	1.41096	3.01177	1.09394	2.7608e-33	3.09367e-31
EPHA8	0.306058	0.070612	-2.11582	5.00479e-05	0.000212642
SSC5D	1.15306	3.07578	1.41549	1.77697e-27	8.62396e-26
ACTC1	0.164565	0.408267	1.31086	3.42872e-10	3.68915e-09
MS4A7	0.904714	2.28951	1.33951	4.99484e-28	2.62763e-26
LILRA6	0.13564	0.280873	1.05013	1.15557e-12	1.52706e-11
C1QC	44.6126	111.978	1.32769	8.56447e-26	3.41168e-24
EMCN	0.601484	1.61486	1.42481	6.99798e-25	2.53824e-23
CLEC14A	4.69853	9.48055	1.01276	7.78235e-33	8.1881e-31
NCF1	0.457318	1.15162	1.3324	1.13445e-19	2.48587e-18
HTRA3	5.37	13.9209	1.37426	1.47571e-35	2.28536e-33
SPARC	86.4455	183.672	1.08726	4.17567e-38	1.02774e-35
HAMP	0.574673	1.18417	1.04307	3.07778e-18	5.96639e-17
LAIR1	1.04984	2.49914	1.25127	1.14774e-36	2.2599e-34
LCN6	0.0653036	0.296778	2.18415	1.49779e-05	7.31279e-05
TMEM150B	0.41074	0.827806	1.01107	6.7651e-10	7.10155e-09
OGN	0.267062	1.65436	2.63103	1.06326e-19	2.33731e-18
C3AR1	1.86568	4.35527	1.22306	3.64444e-32	3.46423e-30
VCAM1	0.801185	2.45241	1.61399	1.07885e-33	1.26015e-31
C11orf96	4.02928	10.7978	1.42215	7.4644e-31	5.84556e-29
LY96	2.2149	5.38919	1.28283	2.25948e-33	2.57375e-31
HLA-DQA2	6.81268	15.6007	1.19532	1.29684e-11	1.59878e-10
CYP1A2	0.178816	0.0622798	-1.52164	0.012	0.0239393
ECM2	0.367556	1.25017	1.76608	1.51379e-38	4.17291e-36
COL10A1	0.303934	1.43842	2.24265	7.54869e-12	9.45851e-11
FGL2	1.93419	4.93025	1.34993	8.96343e-30	5.74618e-28
STAP1	0.176301	0.381314	1.11294	2.18594e-16	3.76611e-15
SAMD3	0.0707348	0.176081	1.31575	1.84967e-28	1.0037e-26
SELENOV	0.519703	0.259319	-1.00296	0.00105762	0.00297609
DPEP1	3.69379	7.3879	1.00006	6.75787e-07	4.55693e-06
PI15	0.307155	1.2298	2.00138	1.45218e-09	1.46633e-08
RFTN1	2.76941	6.00444	1.11645	1.38593e-41	5.16279e-39
AOC3	1.09022	3.52092	1.69134	1.01156e-30	7.61873e-29
KCNE4	0.584936	1.50195	1.36048	8.38538e-29	4.71738e-27
CCRL2	0.383522	0.858459	1.16244	4.60801e-32	4.23415e-30
SYNPO2	0.789992	2.90947	1.88085	2.39573e-42	1.01537e-39
FYB1	0.955694	2.40627	1.33218	5.40644e-24	1.74513e-22
DKK2	0.326858	0.959671	1.55388	2.86273e-21	7.18708e-20
CTLA4	0.636224	1.46495	1.20325	2.69471e-21	6.80422e-20
SIGLEC8	0.146567	0.391081	1.41591	2.86286e-19	6.02424e-18
MYL3	0.430659	1.04903	1.28444	2.19828e-09	2.18922e-08
FLI1	0.682364	1.60277	1.23195	8.81639e-51	1.73595e-47
EOMES	0.235061	0.558371	1.24819	3.41324e-16	5.77236e-15
CD86	1.09048	2.50082	1.19744	7.54684e-28	3.8242e-26
FHL5	0.144183	0.324534	1.17048	5.53091e-14	8.07548e-13
PRKCB	0.265402	0.673829	1.34421	1.95974e-30	1.42164e-28
DNASE1L3	0.107696	0.236664	1.13587	5.40292e-22	1.4488e-20
GPR82	0.118465	0.30866	1.38156	5.6852e-11	6.61817e-10
CNRIP1	0.764629	1.954	1.3536	2.57489e-56	3.54897e-52
BGN	78.3064	214.416	1.45321	5.13234e-34	6.43082e-32
TPSAB1	1.35972	3.46329	1.34883	8.66587e-19	1.75649e-17
MYH11	1.87808	12.7461	2.76272	7.4885e-33	7.93954e-31
CLEC10A	0.669235	1.75421	1.39024	5.8431e-21	1.42541e-19
SIRPB1	0.133611	0.320251	1.26117	1.8229e-13	2.55077e-12
CD226	0.110231	0.232936	1.0794	2.33031e-19	4.93375e-18
FADS6	0.192754	0.0759384	-1.34386	0.000206217	0.000732926
PHYHIP	0.389411	0.861854	1.14615	1.7072e-22	4.79234e-21
CD8A	1.70812	4.99426	1.54787	4.85013e-19	1.00074e-17
CSF2RB	0.673971	1.9563	1.53737	1.76455e-38	4.67708e-36
NDN	2.91918	7.75569	1.40969	5.44919e-46	4.69414e-43
PYHIN1	0.195366	0.557407	1.51255	1.61412e-21	4.15063e-20
MYOC	1.1989	3.02212	1.33385	2.83123e-06	1.67016e-05
GNGT2	0.522074	1.05001	1.00808	2.42128e-27	1.14682e-25
MGP	22.257	65.2415	1.55153	3.44363e-34	4.47769e-32
FCGR2A	1.71442	3.52905	1.04156	1.83648e-29	1.11018e-27
SEZ6L	0.811526	1.70155	1.06814	1.05556e-06	6.87885e-06
MS4A4A	1.1174	2.64827	1.24491	7.69585e-30	4.95663e-28
AGAP2	0.367181	0.834142	1.1838	3.4319e-39	1.05115e-36
TNFSF13B	0.895312	2.24532	1.32646	3.15358e-22	8.60709e-21
GPR171	0.416567	0.920104	1.14325	3.85517e-17	6.90567e-16
CD300C	0.467606	0.963093	1.04238	3.05781e-19	6.41488e-18
KLF2	3.79099	8.38339	1.14496	6.03304e-28	3.11436e-26
FDCSP	1.41296	3.55455	1.33094	2.55834e-07	1.87164e-06
SFRP4	9.83786	53.2023	2.43507	8.24381e-31	6.34773e-29
ABCD2	0.0533921	0.140627	1.39717	2.52045e-24	8.473e-23
KANK3	0.597214	1.2913	1.1125	1.34964e-32	1.38822e-30
NCF4	2.86235	5.87311	1.03693	3.47286e-30	2.36963e-28
FERMT3	4.18601	9.19409	1.13513	3.62528e-31	2.87168e-29
GPR68	0.839238	1.83236	1.12655	1.5594e-26	6.6749e-25
SCIMP	0.308255	0.805063	1.38498	3.22325e-29	1.89855e-27
P2RX1	0.164683	0.44169	1.42334	1.36034e-25	5.29661e-24
OSCAR	1.01845	2.11867	1.05679	2.12986e-20	4.95875e-19
FAP	0.452656	1.48067	1.70976	3.43639e-36	6.07228e-34
LILRB3	0.221224	0.445598	1.01023	7.36736e-22	1.94903e-20
LY9	0.104758	0.284401	1.44087	3.85818e-25	1.42185e-23
C1QB	36.7847	106.062	1.52772	1.56853e-29	9.60849e-28
HOXC13	0.814499	0.352399	-1.2087	0.00435272	0.0100948
CCL2	7.71061	15.7829	1.03345	2.13892e-17	3.93077e-16
SIGLEC11	0.141886	0.388469	1.45307	7.76731e-09	7.20921e-08
CHIT1	0.567769	1.61683	1.50979	0.000207957	0.00073816
HAND2	0.756687	2.0015	1.40331	4.57195e-29	2.64769e-27
C11orf87	0.0665268	0.26763	2.00823	3.75497e-05	0.000164824
GCGR	1.08711	0.37661	-1.52935	0.0161878	0.0308342
KIAA1210	0.0988005	0.241266	1.28804	3.99308e-06	2.26488e-05
LILRA4	0.0721124	0.198418	1.46022	1.83226e-20	4.28762e-19
BHLHE22	0.19482	0.414056	1.08769	1.66079e-17	3.08084e-16
ITGB2	6.0845	14.7755	1.27999	1.23702e-28	6.84733e-27
