# Supplementary material for: Identification of prognostic immune-related genes in the tumor microenvironment of endometrial cancer
Source: Aging (Albany NY). 2020 Feb 19;12(4):3371–87. doi: 10.18632/aging.102817 (PMC7066904; doi:10.18632/aging.102817)
Supplement: Supplementary Table 4 [file aging-12-102817-s004..xlsx]

## Sheet: GO
ONTOLOGY	ID	Description	GeneRatio	BgRatio	pvalue	p.adjust	qvalue	geneID	Count
BP	GO:0042110	T cell activation	79/361	451/18493	1.25864e-52	3.82754e-49	2.91741e-49	CD28/P2RX7/TESPA1/CD5/LILRB1/CCR2/JAML/DOCK2/SLAMF6/CCL19/TIGIT/CD80/CORO1A/LILRB2/SIRPG/CD3E/TMIGD2/IRF4/PTPRC/CD6/FCER1G/TNFRSF4/AIF1/GPR183/SLC46A2/RASAL3/CCL21/CD4/SPN/FCGR2B/HAVCR2/SIT1/ZNF683/ICOS/PDCD1/CD7/FUT7/BATF/CD209/RHOH/PLA2G2D/LCK/LAX1/IL7R/CD3G/WAS/SASH3/NCKAP1L/CD27/GRAP2/APBB1IP/CCL5/IFNG/ZAP70/IL2RA/ITGAL/CCR7/TBX21/CD3D/CD2/PDCD1LG2/SLA2/CLEC4E/LILRB4/ITK/IL12RB1/TNFAIP8L2/CLE…	79
BP	GO:0051249	regulation of lymphocyte activation	69/361	472/18493	1.96295e-40	2.98466e-37	2.27495e-37	CD28/TESPA1/CD5/TNFRSF13B/LILRB1/CCR2/CCL19/SAMSN1/TIGIT/CD80/CORO1A/LILRB2/SIRPG/CD3E/TMIGD2/IRF4/PTPRC/CD6/FCRL3/TNFRSF4/AIF1/GPR183/SLC46A2/RASAL3/CCL21/CD4/SPN/FCGR2B/HAVCR2/IGLL1/SIT1/ZNF683/ICOS/PDCD1/CD209/PLA2G2D/MZB1/LCK/LAX1/IL7R/SASH3/NCKAP1L/CD27/GRAP2/IGLL5/CCL5/IFNG/LST1/ZAP70/IL2RA/CD38/CCR7/TBX21/CD2/PDCD1LG2/SLA2/LILRB4/MNDA/IL12RB1/TNFAIP8L2/CLECL1/LAG3/BTK/CD40LG/VCAM1/CTLA4/CD…	69
BP	GO:0050863	regulation of T cell activation	56/361	305/18493	3.12844e-38	3.17119e-35	2.41713e-35	CD28/TESPA1/CD5/LILRB1/CCR2/CCL19/TIGIT/CD80/CORO1A/LILRB2/SIRPG/CD3E/TMIGD2/IRF4/PTPRC/CD6/AIF1/SLC46A2/RASAL3/CCL21/CD4/SPN/FCGR2B/HAVCR2/SIT1/ZNF683/ICOS/PDCD1/CD209/PLA2G2D/LCK/LAX1/IL7R/SASH3/NCKAP1L/CD27/GRAP2/CCL5/IFNG/ZAP70/IL2RA/CCR7/TBX21/CD2/PDCD1LG2/LILRB4/IL12RB1/TNFAIP8L2/CLECL1/LAG3/CD40LG/VCAM1/CTLA4/CD86/SIRPB1/TNFSF13B	56
BP	GO:0007159	leukocyte cell-cell adhesion	57/361	327/18493	1.27849e-37	9.71973e-35	7.40852e-35	CD28/TESPA1/CD5/LILRB1/CCR2/CCL19/TIGIT/CD80/CORO1A/LILRB2/SIRPG/CD3E/TMIGD2/PTPRC/CD6/AIF1/SELP/RASAL3/CCL21/CD4/SPN/FCGR2B/HAVCR2/ICOS/PDCD1/CD209/PLA2G2D/LCK/LAX1/IL7R/SASH3/NCKAP1L/SELL/CD27/GRAP2/CCL5/IFNG/ZAP70/IL2RA/ITGAL/CCR7/TBX21/PDCD1LG2/LILRB4/IL12RB1/TNFAIP8L2/CLECL1/LAG3/SELPLG/CD40LG/VCAM1/CTLA4/CD86/SIRPB1/TNFSF13B/FERMT3/ITGB2	57
BP	GO:0050867	positive regulation of cell activation	59/361	384/18493	9.58045e-36	5.82683e-33	4.44129e-33	CD28/TESPA1/CD5/LILRB1/CCR2/ITGAM/CCL19/CD80/CORO1A/FGR/LILRB2/SIRPG/PLEK/CD3E/TMIGD2/PTPRC/CD6/FCRL3/FCER1G/TNFRSF4/AIF1/SELP/GPR183/RASAL3/CCL21/CD4/HAVCR2/IGLL1/ICOS/PDCD1/CD209/LCK/IL7R/SASH3/NCKAP1L/CD27/GRAP2/IGLL5/CCL5/IFNG/ZAP70/IL2RA/CD38/CCR7/TBX21/CD2/PDCD1LG2/LILRB4/IL12RB1/CLECL1/BTK/CD40LG/VCAM1/STAP1/CTLA4/CD86/SIRPB1/TNFSF13B/ITGB2	59
BP	GO:0002696	positive regulation of leukocyte activation	57/361	372/18493	1.83069e-34	9.27856e-32	7.07226e-32	CD28/TESPA1/CD5/LILRB1/CCR2/ITGAM/CCL19/CD80/CORO1A/FGR/LILRB2/SIRPG/CD3E/TMIGD2/PTPRC/CD6/FCRL3/FCER1G/TNFRSF4/AIF1/GPR183/RASAL3/CCL21/CD4/HAVCR2/IGLL1/ICOS/PDCD1/CD209/LCK/IL7R/SASH3/NCKAP1L/CD27/GRAP2/IGLL5/CCL5/IFNG/ZAP70/IL2RA/CD38/CCR7/TBX21/CD2/PDCD1LG2/LILRB4/IL12RB1/CLECL1/BTK/CD40LG/VCAM1/STAP1/CTLA4/CD86/SIRPB1/TNFSF13B/ITGB2	57
BP	GO:1903037	regulation of leukocyte cell-cell adhesion	51/361	293/18493	1.22529e-33	5.32303e-31	4.05729e-31	CD28/TESPA1/CD5/LILRB1/CCR2/CCL19/TIGIT/CD80/CORO1A/LILRB2/SIRPG/CD3E/TMIGD2/PTPRC/CD6/AIF1/RASAL3/CCL21/CD4/SPN/FCGR2B/HAVCR2/ICOS/PDCD1/CD209/PLA2G2D/LCK/LAX1/IL7R/SASH3/NCKAP1L/CD27/GRAP2/CCL5/IFNG/ZAP70/IL2RA/CCR7/TBX21/PDCD1LG2/LILRB4/IL12RB1/TNFAIP8L2/CLECL1/LAG3/CD40LG/VCAM1/CTLA4/CD86/SIRPB1/TNFSF13B	51
BP	GO:0050870	positive regulation of T cell activation	43/361	202/18493	2.87645e-32	1.09341e-29	8.33415e-30	CD28/TESPA1/CD5/LILRB1/CCR2/CCL19/CD80/CORO1A/LILRB2/SIRPG/CD3E/TMIGD2/PTPRC/CD6/AIF1/RASAL3/CCL21/CD4/HAVCR2/ICOS/PDCD1/CD209/LCK/IL7R/SASH3/NCKAP1L/CD27/GRAP2/CCL5/IFNG/ZAP70/IL2RA/CCR7/PDCD1LG2/LILRB4/IL12RB1/CLECL1/CD40LG/VCAM1/CTLA4/CD86/SIRPB1/TNFSF13B	43
BP	GO:0046651	lymphocyte proliferation	47/361	264/18493	1.72371e-31	5.82422e-29	4.4393e-29	CD28/P2RX7/TNFRSF13B/LILRB1/CCR2/DOCK2/CCL19/CD80/CORO1A/LILRB2/CD3E/TMIGD2/PTPRC/CD6/FCRL3/TNFRSF4/AIF1/GPR183/RASAL3/CD4/SPN/FCGR2B/HAVCR2/CD79A/CD209/PLA2G2D/MZB1/GAPT/IL7R/SASH3/NCKAP1L/CCL5/MS4A1/LST1/ZAP70/IL2RA/CD38/PDCD1LG2/MNDA/IL12RB1/CLECL1/BTK/CD40LG/VCAM1/CTLA4/CD86/TNFSF13B	47
BP	GO:0032943	mononuclear cell proliferation	47/361	266/18493	2.46006e-31	7.48103e-29	5.70215e-29	CD28/P2RX7/TNFRSF13B/LILRB1/CCR2/DOCK2/CCL19/CD80/CORO1A/LILRB2/CD3E/TMIGD2/PTPRC/CD6/FCRL3/TNFRSF4/AIF1/GPR183/RASAL3/CD4/SPN/FCGR2B/HAVCR2/CD79A/CD209/PLA2G2D/MZB1/GAPT/IL7R/SASH3/NCKAP1L/CCL5/MS4A1/LST1/ZAP70/IL2RA/CD38/PDCD1LG2/MNDA/IL12RB1/CLECL1/BTK/CD40LG/VCAM1/CTLA4/CD86/TNFSF13B	47
BP	GO:1903039	positive regulation of leukocyte cell-cell adhesion	43/361	214/18493	3.748e-31	1.03615e-28	7.8977e-29	CD28/TESPA1/CD5/LILRB1/CCR2/CCL19/CD80/CORO1A/LILRB2/SIRPG/CD3E/TMIGD2/PTPRC/CD6/AIF1/RASAL3/CCL21/CD4/HAVCR2/ICOS/PDCD1/CD209/LCK/IL7R/SASH3/NCKAP1L/CD27/GRAP2/CCL5/IFNG/ZAP70/IL2RA/CCR7/PDCD1LG2/LILRB4/IL12RB1/CLECL1/CD40LG/VCAM1/CTLA4/CD86/SIRPB1/TNFSF13B	43
BP	GO:0051251	positive regulation of lymphocyte activation	51/361	333/18493	7.67806e-31	1.94575e-28	1.48308e-28	CD28/TESPA1/CD5/LILRB1/CCR2/CCL19/CD80/CORO1A/LILRB2/SIRPG/CD3E/TMIGD2/PTPRC/CD6/FCRL3/TNFRSF4/AIF1/GPR183/RASAL3/CCL21/CD4/HAVCR2/IGLL1/ICOS/PDCD1/CD209/LCK/IL7R/SASH3/NCKAP1L/CD27/GRAP2/IGLL5/CCL5/IFNG/ZAP70/IL2RA/CD38/CCR7/TBX21/PDCD1LG2/LILRB4/IL12RB1/CLECL1/BTK/CD40LG/VCAM1/CTLA4/CD86/SIRPB1/TNFSF13B	51
BP	GO:0030098	lymphocyte differentiation	51/361	344/18493	3.83458e-30	8.96997e-28	6.83704e-28	CD28/TESPA1/DOCK2/SPI1/SLAMF6/CCL19/CD80/LILRB2/CD3E/IRF4/PTPRC/FCRL3/FCER1G/GPR183/SLC46A2/CD4/SPN/FCGR2B/CD79A/ZNF683/IKZF1/FUT7/BATF/RHOH/PLA2G2D/LCK/IL7R/CD3G/SASH3/NCKAP1L/CD27/IFNG/ZAP70/IL2RA/CCR7/TBX21/CD3D/CD2/CLEC4E/LILRB4/ITK/IL12RB1/THEMIS/BTK/CD40LG/VCAM1/CTLA4/EOMES/CD86/CD8A/LY9	51
BP	GO:0070661	leukocyte proliferation	47/361	283/18493	4.46532e-30	9.69931e-28	7.39295e-28	CD28/P2RX7/TNFRSF13B/LILRB1/CCR2/DOCK2/CCL19/CD80/CORO1A/LILRB2/CD3E/TMIGD2/PTPRC/CD6/FCRL3/TNFRSF4/AIF1/GPR183/RASAL3/CD4/SPN/FCGR2B/HAVCR2/CD79A/CD209/PLA2G2D/MZB1/GAPT/IL7R/SASH3/NCKAP1L/CCL5/MS4A1/LST1/ZAP70/IL2RA/CD38/PDCD1LG2/MNDA/IL12RB1/CLECL1/BTK/CD40LG/VCAM1/CTLA4/CD86/TNFSF13B	47
BP	GO:0050670	regulation of lymphocyte proliferation	41/361	205/18493	1.19354e-29	2.4197e-27	1.84433e-27	CD28/TNFRSF13B/LILRB1/CCR2/CCL19/CD80/CORO1A/LILRB2/CD3E/TMIGD2/PTPRC/CD6/FCRL3/TNFRSF4/AIF1/GPR183/RASAL3/CD4/SPN/FCGR2B/HAVCR2/CD209/PLA2G2D/MZB1/SASH3/NCKAP1L/CCL5/LST1/ZAP70/IL2RA/CD38/PDCD1LG2/MNDA/IL12RB1/CLECL1/BTK/CD40LG/VCAM1/CTLA4/CD86/TNFSF13B	41
BP	GO:0032944	regulation of mononuclear cell proliferation	41/361	206/18493	1.46471e-29	2.78387e-27	2.1219e-27	CD28/TNFRSF13B/LILRB1/CCR2/CCL19/CD80/CORO1A/LILRB2/CD3E/TMIGD2/PTPRC/CD6/FCRL3/TNFRSF4/AIF1/GPR183/RASAL3/CD4/SPN/FCGR2B/HAVCR2/CD209/PLA2G2D/MZB1/SASH3/NCKAP1L/CCL5/LST1/ZAP70/IL2RA/CD38/PDCD1LG2/MNDA/IL12RB1/CLECL1/BTK/CD40LG/VCAM1/CTLA4/CD86/TNFSF13B	41
BP	GO:0022407	regulation of cell-cell adhesion	53/361	388/18493	1.66073e-29	2.97075e-27	2.26435e-27	CD28/TESPA1/CD5/LILRB1/CCR2/CCL19/TIGIT/CD80/CORO1A/LILRB2/SIRPG/CD3E/TMIGD2/PTPRC/CD6/AIF1/RASAL3/CCL21/CD4/SPN/FCGR2B/HAVCR2/ICOS/PDCD1/CD209/PLA2G2D/LCK/LAX1/IL7R/SASH3/NCKAP1L/CD27/GRAP2/CCL5/IFNG/ZAP70/IL2RA/CXCL13/CCR7/TBX21/PDCD1LG2/LILRB4/IL12RB1/TNFAIP8L2/CLECL1/LAG3/CD40LG/VCAM1/CTLA4/CD86/SIRPB1/TNFSF13B/FERMT3	53
BP	GO:0030217	T cell differentiation	43/361	234/18493	1.87667e-29	3.17053e-27	2.41663e-27	CD28/TESPA1/DOCK2/SLAMF6/CCL19/CD80/LILRB2/CD3E/IRF4/PTPRC/FCER1G/GPR183/SLC46A2/CD4/SPN/ZNF683/FUT7/BATF/RHOH/PLA2G2D/LCK/IL7R/CD3G/SASH3/NCKAP1L/CD27/IFNG/ZAP70/IL2RA/CCR7/TBX21/CD3D/CD2/CLEC4E/LILRB4/ITK/IL12RB1/THEMIS/CTLA4/EOMES/CD86/CD8A/LY9	43
BP	GO:0002768	immune response-regulating cell surface receptor signaling pathway	56/361	445/18493	2.75887e-29	4.41564e-27	3.36567e-27	CD28/TESPA1/CD200R1/LILRB1/BLK/NCR3/TRAT1/FGR/LILRB2/CD3E/UBASH3A/FCGR1B/PTPRC/FCRL3/FCER1G/CD247/CD4/FCGR2B/IGLL1/CD79A/CD209/LCK/FCGR3A/CD3G/WAS/NCKAP1L/GRAP2/FPR3/IGLL5/ZAP70/HLA-DQA1/CD38/FCN1/CCR7/CD3D/SLA2/CLEC4E/LILRB4/ICAM3/MNDA/ITK/FPR1/CMKLR1/FCGR1A/LCP2/THEMIS/BTK/C3AR1/HLA-DQA2/STAP1/FYB1/CTLA4/PRKCB/CLEC10A/FCGR2A/LILRA4	56
BP	GO:0022409	positive regulation of cell-cell adhesion	44/361	251/18493	3.21941e-29	4.89511e-27	3.73112e-27	CD28/TESPA1/CD5/LILRB1/CCR2/CCL19/CD80/CORO1A/LILRB2/SIRPG/CD3E/TMIGD2/PTPRC/CD6/AIF1/RASAL3/CCL21/CD4/HAVCR2/ICOS/PDCD1/CD209/LCK/IL7R/SASH3/NCKAP1L/CD27/GRAP2/CCL5/IFNG/ZAP70/IL2RA/CXCL13/CCR7/PDCD1LG2/LILRB4/IL12RB1/CLECL1/CD40LG/VCAM1/CTLA4/CD86/SIRPB1/TNFSF13B	44
BP	GO:0070663	regulation of leukocyte proliferation	41/361	216/18493	1.06447e-28	1.54146e-26	1.17492e-26	CD28/TNFRSF13B/LILRB1/CCR2/CCL19/CD80/CORO1A/LILRB2/CD3E/TMIGD2/PTPRC/CD6/FCRL3/TNFRSF4/AIF1/GPR183/RASAL3/CD4/SPN/FCGR2B/HAVCR2/CD209/PLA2G2D/MZB1/SASH3/NCKAP1L/CCL5/LST1/ZAP70/IL2RA/CD38/PDCD1LG2/MNDA/IL12RB1/CLECL1/BTK/CD40LG/VCAM1/CTLA4/CD86/TNFSF13B	41
BP	GO:0050900	leukocyte migration	55/361	478/18493	8.70589e-27	1.20339e-24	9.17242e-25	VPREB3/CCL17/XCL2/CD200R1/CXCL11/CCR2/JAML/ITGAM/CCL19/CORO1A/MMP9/SIRPG/DOK2/CXCR1/FCER1G/AIF1/CCL18/SELP/GPR183/CCL21/SPN/IGLL1/IL16/GYPC/FUT7/CCL23/CXCL9/LCK/CCR5/CCL3/NCKAP1L/SELL/JCHAIN/CCL5/P2RY12/CCL3L1/ZAP70/CXCL13/CD84/ITGAL/CCR7/TBX21/CD2/CXCR3/CCL4/CMKLR1/CCL14/CD48/SELPLG/APOD/CD244/C3AR1/VCAM1/STAP1/ITGB2	55
BP	GO:0002429	immune response-activating cell surface receptor signaling pathway	51/361	414/18493	2.96743e-26	3.92346e-24	2.99052e-24	CD28/TESPA1/BLK/NCR3/TRAT1/FGR/CD3E/UBASH3A/PTPRC/FCRL3/FCER1G/CD247/CD4/FCGR2B/IGLL1/CD79A/CD209/LCK/FCGR3A/CD3G/WAS/NCKAP1L/GRAP2/FPR3/IGLL5/ZAP70/HLA-DQA1/CD38/FCN1/CCR7/CD3D/SLA2/CLEC4E/LILRB4/ICAM3/MNDA/ITK/FPR1/CMKLR1/FCGR1A/LCP2/THEMIS/BTK/C3AR1/HLA-DQA2/STAP1/FYB1/CTLA4/PRKCB/CLEC10A/FCGR2A	51
BP	GO:0050671	positive regulation of lymphocyte proliferation	31/361	132/18493	6.79533e-25	8.61025e-23	6.56286e-23	CD28/CCR2/CCL19/CD80/CORO1A/LILRB2/CD3E/TMIGD2/PTPRC/CD6/FCRL3/TNFRSF4/AIF1/GPR183/RASAL3/CD4/HAVCR2/CD209/SASH3/NCKAP1L/CCL5/ZAP70/IL2RA/CD38/PDCD1LG2/IL12RB1/CLECL1/CD40LG/VCAM1/CD86/TNFSF13B	31
BP	GO:0032946	positive regulation of mononuclear cell proliferation	31/361	133/18493	8.70662e-25	1.05907e-22	8.07241e-23	CD28/CCR2/CCL19/CD80/CORO1A/LILRB2/CD3E/TMIGD2/PTPRC/CD6/FCRL3/TNFRSF4/AIF1/GPR183/RASAL3/CD4/HAVCR2/CD209/SASH3/NCKAP1L/CCL5/ZAP70/IL2RA/CD38/PDCD1LG2/IL12RB1/CLECL1/CD40LG/VCAM1/CD86/TNFSF13B	31
BP	GO:0045785	positive regulation of cell adhesion	48/361	397/18493	2.23994e-24	2.61987e-22	1.9969e-22	CD28/TESPA1/CD5/LILRB1/CCR2/CCL19/CD80/VTN/CORO1A/LILRB2/SIRPG/CD3E/TMIGD2/PTPRC/CD6/AIF1/RASAL3/CCL21/CD4/HAVCR2/ICOS/PDCD1/CD209/LCK/IL7R/SASH3/NCKAP1L/CD27/GRAP2/APBB1IP/CCL5/IFNG/P2RY12/ZAP70/IL2RA/CXCL13/CCR7/PDCD1LG2/LILRB4/IL12RB1/CLECL1/CD40LG/VCAM1/CTLA4/CD86/SIRPB1/MYOC/TNFSF13B	48
BP	GO:0070665	positive regulation of leukocyte proliferation	31/361	139/18493	3.67779e-24	4.14228e-22	3.15731e-22	CD28/CCR2/CCL19/CD80/CORO1A/LILRB2/CD3E/TMIGD2/PTPRC/CD6/FCRL3/TNFRSF4/AIF1/GPR183/RASAL3/CD4/HAVCR2/CD209/SASH3/NCKAP1L/CCL5/ZAP70/IL2RA/CD38/PDCD1LG2/IL12RB1/CLECL1/CD40LG/VCAM1/CD86/TNFSF13B	31
BP	GO:0070098	chemokine-mediated signaling pathway	26/361	87/18493	5.0763e-24	5.51322e-22	4.20226e-22	CCL17/XCL2/CXCL11/CCR2/CCL19/ACKR1/CXCR1/CXCR6/CCL18/CCL21/XCR1/CCR4/CCL23/CXCL9/CCR5/CCL3/CCL5/CCL3L1/CXCL13/CCR8/CCR7/CXCR3/CCL4/CMKLR1/CCL14/CCRL2	26
BP	GO:0042102	positive regulation of T cell proliferation	27/361	97/18493	5.63715e-24	5.91123e-22	4.50563e-22	CD28/CCR2/CCL19/CD80/CORO1A/LILRB2/CD3E/TMIGD2/PTPRC/CD6/AIF1/RASAL3/CD4/HAVCR2/CD209/SASH3/NCKAP1L/CCL5/ZAP70/IL2RA/PDCD1LG2/IL12RB1/CLECL1/CD40LG/VCAM1/CD86/TNFSF13B	27
BP	GO:0002449	lymphocyte mediated immunity	44/361	344/18493	2.14346e-23	2.17275e-21	1.65611e-21	CD28/P2RX7/LILRB1/NCR3/SLAMF6/CD96/SH2D1A/KLRD1/CORO1A/IL18RAP/PTPRC/FCER1G/TLR8/FCGR2B/KLRC2/HAVCR2/IGLL1/SLAMF7/BATF/CD1E/GAPT/GZMM/IL7R/WAS/SASH3/GZMB/CD27/IGLL5/C1S/TBX21/SLA2/CRTAM/CD1B/LTA/IL12RB1/PRF1/FCER2/C1QA/LAG3/BTK/CD40LG/C1QC/CD8A/C1QB	44
BP	GO:0042098	T cell proliferation	33/361	178/18493	6.24906e-23	5.90461e-21	4.50058e-21	CD28/P2RX7/LILRB1/CCR2/DOCK2/CCL19/CD80/CORO1A/LILRB2/CD3E/TMIGD2/PTPRC/CD6/TNFRSF4/AIF1/RASAL3/CD4/SPN/HAVCR2/CD209/PLA2G2D/SASH3/NCKAP1L/CCL5/ZAP70/IL2RA/PDCD1LG2/IL12RB1/CLECL1/CD40LG/VCAM1/CD86/TNFSF13B	33
BP	GO:1990868	response to chemokine	26/361	95/18493	6.4075e-23	5.90461e-21	4.50058e-21	CCL17/XCL2/CXCL11/CCR2/CCL19/ACKR1/CXCR1/CXCR6/CCL18/CCL21/XCR1/CCR4/CCL23/CXCL9/CCR5/CCL3/CCL5/CCL3L1/CXCL13/CCR8/CCR7/CXCR3/CCL4/CMKLR1/CCL14/CCRL2	26
BP	GO:1990869	cellular response to chemokine	26/361	95/18493	6.4075e-23	5.90461e-21	4.50058e-21	CCL17/XCL2/CXCL11/CCR2/CCL19/ACKR1/CXCR1/CXCR6/CCL18/CCL21/XCR1/CCR4/CCL23/CXCL9/CCR5/CCL3/CCL5/CCL3L1/CXCL13/CCR8/CCR7/CXCR3/CCL4/CMKLR1/CCL14/CCRL2	26
BP	GO:0002697	regulation of immune effector process	48/361	439/18493	1.83439e-22	1.6407e-20	1.25056e-20	CD28/P2RX7/LILRB1/CCR2/ITGAM/NCR3/SLAMF6/CCL19/CD80/CD96/SH2D1A/VTN/IL18RAP/FGR/IRF4/PTPRC/FCRL3/FCER1G/TNFRSF4/FCGR2B/HAVCR2/ZNF683/CD1E/MZB1/IL7R/WAS/SASH3/AIM2/IFNG/IL2RA/C1S/CD84/TBX21/CRTAM/CD1B/LTA/IL12RB1/FCER2/C1QA/LAG3/BTK/CD40LG/CD244/C1QC/C3AR1/CD86/C1QB/ITGB2	48
BP	GO:0002460	adaptive immune response based on somatic recombination of immune receptors built from immunoglobulin superfamily domains	43/361	354/18493	5.51984e-22	4.79596e-20	3.65555e-20	CD28/P2RX7/LILRB1/CCR2/SLAMF6/CCL19/CD80/IL18RAP/IRF4/PTPRC/FCER1G/TLR8/CD4/SPN/FCGR2B/HAVCR2/IGLL1/BATF/CD1E/GAPT/GZMM/IL7R/WAS/SASH3/CD27/IGLL5/CXCL13/C1S/TBX21/SLA2/CD1B/LTA/IL12RB1/PRF1/FCER2/C1QA/BTK/CD40LG/C1QC/CD8A/TNFSF13B/LY9/C1QB	43
BP	GO:0042129	regulation of T cell proliferation	30/361	153/18493	1.10792e-21	9.35888e-20	7.13348e-20	CD28/LILRB1/CCR2/CCL19/CD80/CORO1A/LILRB2/CD3E/TMIGD2/PTPRC/CD6/AIF1/RASAL3/CD4/SPN/HAVCR2/CD209/PLA2G2D/SASH3/NCKAP1L/CCL5/ZAP70/IL2RA/PDCD1LG2/IL12RB1/CLECL1/CD40LG/VCAM1/CD86/TNFSF13B	30
BP	GO:0002683	negative regulation of immune system process	46/361	437/18493	7.15059e-21	5.87701e-19	4.47954e-19	TNFRSF13B/CD200R1/LILRB1/CCR2/SAMSN1/TIGIT/CD80/CD96/CD300LF/LILRB2/UBASH3A/IRF4/PTPRC/FCRL3/FCER1G/TNFRSF4/CCL21/SPN/FCGR2B/HAVCR2/PDCD1/PLA2G2D/LAX1/IL7R/CCL3/LST1/IL2RA/CD84/TBX21/PDCD1LG2/SLA2/LILRB4/MNDA/TNFAIP8L2/CD14/LAG3/BTK/APOD/C1QC/LY96/STAP1/CTLA4/CD86/GPR171/LILRB3/LILRA4	46
BP	GO:0046631	alpha-beta T cell activation	27/361	134/18493	5.93877e-20	4.75258e-18	3.62248e-18	CD28/LILRB1/CCR2/DOCK2/SLAMF6/CCL19/CD80/CD3E/IRF4/PTPRC/GPR183/RASAL3/SPN/ZNF683/FUT7/BATF/PLA2G2D/SASH3/NCKAP1L/IFNG/ZAP70/TBX21/ITK/IL12RB1/EOMES/CD86/LY9	27
BP	GO:0050851	antigen receptor-mediated signaling pathway	35/361	259/18493	1.43072e-19	1.11559e-17	8.5032e-18	CD28/TESPA1/BLK/TRAT1/CD3E/UBASH3A/PTPRC/FCRL3/CD247/CD4/IGLL1/CD79A/LCK/CD3G/WAS/NCKAP1L/GRAP2/IGLL5/ZAP70/HLA-DQA1/CD38/CCR7/CD3D/SLA2/LILRB4/MNDA/ITK/LCP2/THEMIS/BTK/HLA-DQA2/STAP1/FYB1/CTLA4/PRKCB	35
BP	GO:0060326	cell chemotaxis	37/361	295/18493	1.63574e-19	1.24357e-17	9.47869e-18	CCL17/XCL2/CXCL11/CCR2/JAML/CCL19/CORO1A/CXCR1/FCER1G/AIF1/CXCR6/CCL18/GPR183/CCL21/IL16/XCR1/CCR4/CCL23/CXCL9/CCR5/CCL3/NCKAP1L/BIN2/CCL5/CCL3L1/CXCL13/CCR8/CCR7/CXCR3/CCL4/CMKLR1/CCL14/C3AR1/VCAM1/STAP1/CCRL2/ITGB2	37
BP	GO:0002699	positive regulation of immune effector process	31/361	209/18493	1.19841e-18	8.88869e-17	6.77509e-17	CD28/P2RX7/LILRB1/CCR2/ITGAM/NCR3/SLAMF6/CCL19/CD80/SH2D1A/IL18RAP/FGR/PTPRC/FCER1G/TNFRSF4/CD1E/MZB1/SASH3/IFNG/CD84/TBX21/CRTAM/CD1B/LTA/IL12RB1/FCER2/LAG3/BTK/CD244/CD86/ITGB2	31
BP	GO:0006968	cellular defense response	19/361	61/18493	2.90561e-18	2.1038e-16	1.60355e-16	GNLY/CCR2/TRAT1/SH2D1A/LILRB2/TNFRSF4/SPN/KLRC2/LSP1/CXCL9/CCR5/TYROBP/KIR2DL4/MNDA/ITK/PRF1/NCF1/LY96/CD300C	19
BP	GO:0001819	positive regulation of cytokine production	42/361	422/18493	3.22332e-18	2.27956e-16	1.73752e-16	CD28/P2RX7/CCR2/SLAMF6/CCL19/TIGIT/CD80/FGR/LILRB2/CD3E/TMIGD2/IRF4/PTPRC/IRF8/CD6/FCER1G/TLR8/CD4/SPN/HAVCR2/TLR7/CCL3/SASH3/AIM2/IFNG/GBP5/FCN1/CSF1R/CYBB/CCR7/CD2/CLEC4E/CRTAM/LTA/IL12RB1/CD14/CD40LG/CD244/C3AR1/LY96/CD86/LY9	42
BP	GO:0072676	lymphocyte migration	23/361	105/18493	4.90248e-18	3.38828e-16	2.5826e-16	CCL17/XCL2/CD200R1/CXCL11/CCR2/CCL19/AIF1/CCL18/GPR183/CCL21/SPN/CCL23/CCL3/CCL5/CCL3L1/ZAP70/CXCL13/CCR7/TBX21/CXCR3/CCL4/CCL14/APOD	23
BP	GO:0045058	T cell selection	17/361	48/18493	1.46056e-17	9.87013e-16	7.52316e-16	CD28/DOCK2/SLAMF6/CD3E/IRF4/PTPRC/CD4/SPN/BATF/CD3G/ZAP70/CCR7/TBX21/CD3D/IL12RB1/THEMIS/LY9	17
BP	GO:0002703	regulation of leukocyte mediated immunity	29/361	196/18493	1.7352e-17	1.14712e-15	8.74351e-16	CD28/P2RX7/LILRB1/CCR2/ITGAM/NCR3/SLAMF6/CD96/SH2D1A/IL18RAP/FGR/PTPRC/FCER1G/FCGR2B/HAVCR2/CD1E/IL7R/WAS/SASH3/CD84/TBX21/CRTAM/CD1B/LTA/IL12RB1/FCER2/LAG3/BTK/ITGB2	29
BP	GO:0031349	positive regulation of defense response	41/361	427/18493	3.01821e-17	1.95285e-15	1.48849e-15	CD28/SUCNR1/TLR10/CCR2/ITGAM/NCR3/SLAMF6/CD300LF/SH2D1A/IL18RAP/IRF4/CD6/FCRL3/FCER1G/TLR8/CCL18/HAVCR2/TLR7/CD209/TNIP3/CCL3/AIM2/CCL5/CCL3L1/MARCO/GBP5/FCN1/CCR7/CLEC4E/CRTAM/ICAM3/LTA/CCL14/CD14/LAG3/BTK/LY96/STAP1/CLEC10A/LILRA4/ITGB2	41
BP	GO:0030595	leukocyte chemotaxis	30/361	217/18493	3.29964e-17	2.09046e-15	1.59338e-15	CCL17/XCL2/CXCL11/CCR2/JAML/CCL19/CORO1A/CXCR1/FCER1G/AIF1/CCL18/GPR183/CCL21/IL16/CCL23/CXCL9/CCR5/CCL3/NCKAP1L/CCL5/CCL3L1/CXCL13/CCR7/CXCR3/CCL4/CMKLR1/CCL14/C3AR1/STAP1/ITGB2	30
BP	GO:0042119	neutrophil activation	44/361	498/18493	4.43215e-17	2.75064e-15	2.09658e-15	DOCK2/ITGAM/RETN/GMFG/CD33/IL18RAP/MMP9/FGR/LILRB2/PTPRC/CXCR1/FCER1G/FCGR2B/SIGLEC9/CD53/GPR84/MCEMP1/NCKAP1L/BIN2/SELL/CCL5/TYROBP/SIGLEC14/FCN1/ITGAL/CYBB/HK3/CD68/MNDA/FPR1/ARHGAP9/CD14/CLEC12A/LYZ/LAIR1/C3AR1/FGL2/SIRPB1/FCGR2A/P2RX1/OSCAR/LILRB3/CHIT1/ITGB2	44
BP	GO:0001906	cell killing	26/361	158/18493	5.77903e-17	3.5148e-15	2.67903e-15	P2RX7/GNLY/LILRB1/NCR3/SLAMF6/SH2D1A/CORO1A/IL18RAP/PTPRC/FCGR2B/HAVCR2/SLAMF7/CD1E/GZMM/IL7R/GZMB/IFNG/CRTAM/CD1B/IL12RB1/PRF1/FCER2/LAG3/LYZ/HAMP/STAP1	26
BP	GO:0002285	lymphocyte activation involved in immune response	27/361	174/18493	6.7094e-17	4.00064e-15	3.04935e-15	CD28/LILRB1/SLAMF6/CCL19/CD80/CORO1A/IRF4/PTPRC/FCER1G/GPR183/SPN/FCGR2B/HAVCR2/ZNF683/BATF/GAPT/APBB1IP/IFNG/ITGAL/TBX21/CLEC4E/IL12RB1/CD40LG/CD244/EOMES/CD86/LY9	27
BP	GO:0032103	positive regulation of response to external stimulus	34/361	297/18493	8.94268e-17	5.22975e-15	3.98619e-15	CD28/SUCNR1/TLR10/XCL2/CCR2/ITGAM/CCL19/CD6/FCER1G/AIF1/CCL18/CCL21/LY86/HAVCR2/TLR7/IL16/CCR4/CCL3/NCKAP1L/CCL5/P2RY12/CCL3L1/GBP5/CXCL13/CCR7/CCL4/LTA/CMKLR1/CCL14/BTK/C3AR1/LY96/STAP1/ITGB2	34
BP	GO:0031295	T cell costimulation	17/361	54/18493	1.45879e-16	8.37017e-15	6.37987e-15	CD28/CD5/CCL19/CD80/CD3E/TMIGD2/CCL21/ICOS/PDCD1/LCK/GRAP2/CCR7/PDCD1LG2/CD40LG/CTLA4/CD86/TNFSF13B	17
BP	GO:0002695	negative regulation of leukocyte activation	26/361	164/18493	1.49017e-16	8.39185e-15	6.39639e-15	TNFRSF13B/LILRB1/CCR2/SAMSN1/TIGIT/CD80/CD300LF/LILRB2/PTPRC/SPN/FCGR2B/HAVCR2/PLA2G2D/LAX1/LST1/IL2RA/CD84/TBX21/PDCD1LG2/SLA2/MNDA/TNFAIP8L2/LAG3/BTK/CTLA4/CD86	26
BP	GO:1902105	regulation of leukocyte differentiation	32/361	265/18493	1.57804e-16	8.72514e-15	6.65043e-15	CD28/TESPA1/LILRB1/CCL19/CD80/LILRB2/IRF4/PTPRC/FCRL3/SLC46A2/CD4/FCGR2B/ZNF683/IL7R/CCL3/SASH3/NCKAP1L/CD27/TYROBP/IFNG/ZAP70/IL2RA/TBX21/CD2/LILRB4/IL12RB1/EVI2B/BTK/C1QC/CTLA4/CD86/LILRB3	32
BP	GO:0031294	lymphocyte costimulation	17/361	55/18493	2.07429e-16	1.12641e-14	8.5857e-15	CD28/CD5/CCL19/CD80/CD3E/TMIGD2/CCL21/ICOS/PDCD1/LCK/GRAP2/CCR7/PDCD1LG2/CD40LG/CTLA4/CD86/TNFSF13B	17
BP	GO:0007204	positive regulation of cytosolic calcium ion concentration	34/361	309/18493	3.01579e-16	1.60895e-14	1.22636e-14	P2RX7/CXCL11/CCR2/CCL19/CORO1A/FASLG/PTPRC/CXCR1/CXCR6/CCL21/CD4/XCR1/GPR174/CCR4/CXCL9/LCK/CCR5/CCL3/S1PR4/FPR3/CD52/RAMP3/CXCL13/CD38/CCR8/GPR65/CCR7/P2RY8/CXCR3/FPR1/CMKLR1/P2RY10/C3AR1/CCRL2	34
BP	GO:0030593	neutrophil chemotaxis	21/361	101/18493	4.39487e-16	2.30427e-14	1.75635e-14	CCL17/XCL2/CXCL11/JAML/CCL19/CXCR1/FCER1G/CCL18/CCL21/CCL23/CXCL9/CCL3/NCKAP1L/CCL5/CCL3L1/CXCL13/CCR7/CCL4/CCL14/C3AR1/ITGB2	21
BP	GO:0002706	regulation of lymphocyte mediated immunity	24/361	146/18493	9.64278e-16	4.97012e-14	3.7883e-14	CD28/P2RX7/LILRB1/NCR3/SLAMF6/CD96/SH2D1A/IL18RAP/PTPRC/FCER1G/FCGR2B/HAVCR2/CD1E/IL7R/WAS/SASH3/TBX21/CRTAM/CD1B/LTA/IL12RB1/FCER2/LAG3/BTK	24
BP	GO:0001909	leukocyte mediated cytotoxicity	21/361	105/18493	1.0142e-15	5.1398e-14	3.91763e-14	P2RX7/LILRB1/NCR3/SLAMF6/SH2D1A/CORO1A/IL18RAP/PTPRC/FCGR2B/HAVCR2/SLAMF7/CD1E/GZMM/IL7R/GZMB/CRTAM/CD1B/IL12RB1/PRF1/LAG3/STAP1	21
BP	GO:0006909	phagocytosis	35/361	342/18493	1.031e-15	5.1398e-14	3.91763e-14	P2RX7/DOCK2/ITGAM/CD300LF/CORO1A/FGR/SIRPG/PTPRC/IRF8/FCER1G/MSR1/AIF1/CD247/FCGR2B/IGLL1/FCGR3A/CD3G/WAS/NCKAP1L/BIN2/IGLL5/PLD4/MARCO/FCN1/ITGAL/SLAMF1/ICAM3/FCGR1A/CEACAM4/CD14/STAP1/SIRPB1/FCGR2A/NCF4/ITGB2	35
BP	GO:0032609	interferon-gamma production	21/361	106/18493	1.24253e-15	6.0944e-14	4.64524e-14	LILRB1/CCR2/SLAMF6/CD96/IL18RAP/CD3E/IRF8/TLR8/SPN/HAVCR2/TLR7/SASH3/CCR7/CD2/PDCD1LG2/LTA/ITK/IL12RB1/CD14/CD244/EOMES	21
BP	GO:0071621	granulocyte chemotaxis	22/361	120/18493	1.44111e-15	6.90836e-14	5.26565e-14	CCL17/XCL2/CXCL11/JAML/CCL19/CXCR1/FCER1G/CCL18/CCL21/CCL23/CXCL9/CCL3/NCKAP1L/CCL5/CCL3L1/CXCL13/CCR7/CCL4/CMKLR1/CCL14/C3AR1/ITGB2	22
BP	GO:0043368	positive T cell selection	14/361	35/18493	1.45391e-15	6.90836e-14	5.26565e-14	DOCK2/SLAMF6/CD3E/IRF4/PTPRC/SPN/BATF/CD3G/ZAP70/TBX21/CD3D/IL12RB1/THEMIS/LY9	14
BP	GO:0051480	regulation of cytosolic calcium ion concentration	35/361	350/18493	2.10069e-15	9.82801e-14	7.49105e-14	P2RX7/CXCL11/CCR2/CCL19/CORO1A/FASLG/PTPRC/CXCR1/CXCR6/CCL21/CD4/XCR1/GPR174/CCR4/CXCL9/LCK/CCR5/CCL3/S1PR4/FPR3/CD52/RAMP3/CXCL13/CD38/CCR8/GPR65/CCR7/P2RY8/CXCR3/FPR1/CMKLR1/P2RY10/C3AR1/CCRL2/P2RX1	35
BP	GO:0097529	myeloid leukocyte migration	27/361	199/18493	2.14199e-15	9.86939e-14	7.5226e-14	CCL17/XCL2/CD200R1/CXCL11/CCR2/JAML/CCL19/CXCR1/FCER1G/AIF1/CCL18/CCL21/CCL23/CXCL9/CCL3/NCKAP1L/CCL5/P2RY12/CCL3L1/CXCL13/CCR7/CCL4/CMKLR1/CCL14/C3AR1/STAP1/ITGB2	27
BP	GO:0043312	neutrophil degranulation	41/361	485/18493	2.60693e-15	1.18324e-13	9.0188e-14	DOCK2/ITGAM/RETN/GMFG/CD33/MMP9/FGR/LILRB2/PTPRC/CXCR1/FCER1G/SIGLEC9/CD53/GPR84/MCEMP1/NCKAP1L/BIN2/SELL/TYROBP/SIGLEC14/FCN1/ITGAL/CYBB/HK3/CD68/MNDA/FPR1/ARHGAP9/CD14/CLEC12A/LYZ/LAIR1/C3AR1/FGL2/SIRPB1/FCGR2A/P2RX1/OSCAR/LILRB3/CHIT1/ITGB2	41
BP	GO:0050866	negative regulation of cell activation	26/361	184/18493	2.64715e-15	1.18382e-13	9.02326e-14	TNFRSF13B/LILRB1/CCR2/SAMSN1/TIGIT/CD80/CD300LF/LILRB2/PTPRC/SPN/FCGR2B/HAVCR2/PLA2G2D/LAX1/LST1/IL2RA/CD84/TBX21/PDCD1LG2/SLA2/MNDA/TNFAIP8L2/LAG3/BTK/CTLA4/CD86	26
BP	GO:0002283	neutrophil activation involved in immune response	41/361	488/18493	3.22145e-15	1.41977e-13	1.08217e-13	DOCK2/ITGAM/RETN/GMFG/CD33/MMP9/FGR/LILRB2/PTPRC/CXCR1/FCER1G/SIGLEC9/CD53/GPR84/MCEMP1/NCKAP1L/BIN2/SELL/TYROBP/SIGLEC14/FCN1/ITGAL/CYBB/HK3/CD68/MNDA/FPR1/ARHGAP9/CD14/CLEC12A/LYZ/LAIR1/C3AR1/FGL2/SIRPB1/FCGR2A/P2RX1/OSCAR/LILRB3/CHIT1/ITGB2	41
BP	GO:1990266	neutrophil migration	21/361	112/18493	4.00924e-15	1.74173e-13	1.32757e-13	CCL17/XCL2/CXCL11/JAML/CCL19/CXCR1/FCER1G/CCL18/CCL21/CCL23/CXCL9/CCL3/NCKAP1L/CCL5/CCL3L1/CXCL13/CCR7/CCL4/CCL14/C3AR1/ITGB2	21
BP	GO:0006874	cellular calcium ion homeostasis	39/361	448/18493	4.99861e-15	2.14096e-13	1.63187e-13	P2RX7/CXCL11/CCR2/CCL19/CORO1A/FASLG/PTPRC/CXCR1/CXCR6/CCL21/CD4/XCR1/GPR174/CCR4/CCL23/CXCL9/LCK/CCR5/CCL3/S1PR4/FPR3/CCL5/CD52/RAMP3/CXCL13/CD38/CCR8/GPR65/CCR7/P2RY8/CXCR3/FPR1/CMKLR1/CCL14/P2RY10/C3AR1/CCRL2/PRKCB/P2RX1	39
BP	GO:0002819	regulation of adaptive immune response	24/361	157/18493	5.25955e-15	2.22143e-13	1.69321e-13	CD28/P2RX7/LILRB1/CCR2/CCL19/SAMSN1/CD80/PTPRC/FCER1G/CD4/FCGR2B/HAVCR2/CD1E/IL7R/WAS/SASH3/TBX21/CD1B/LTA/IL12RB1/CD48/FCER2/BTK/TNFSF13B	24
BP	GO:0031341	regulation of cell killing	19/361	88/18493	5.39882e-15	2.24901e-13	1.71423e-13	P2RX7/LILRB1/NCR3/SLAMF6/SH2D1A/IL18RAP/PTPRC/FCGR2B/HAVCR2/CD1E/IL7R/IFNG/CRTAM/CD1B/IL12RB1/PRF1/FCER2/LAG3/STAP1	19
BP	GO:0002286	T cell activation involved in immune response	20/361	101/18493	6.05999e-15	2.45712e-13	1.87286e-13	LILRB1/SLAMF6/CCL19/CD80/IRF4/FCER1G/GPR183/SPN/FCGR2B/HAVCR2/BATF/APBB1IP/IFNG/ITGAL/TBX21/CLEC4E/IL12RB1/EOMES/CD86/LY9	20
BP	GO:0046632	alpha-beta T cell differentiation	20/361	101/18493	6.05999e-15	2.45712e-13	1.87286e-13	SLAMF6/CCL19/CD80/IRF4/GPR183/SPN/ZNF683/FUT7/BATF/PLA2G2D/SASH3/NCKAP1L/IFNG/ZAP70/TBX21/ITK/IL12RB1/EOMES/CD86/LY9	20
BP	GO:0002446	neutrophil mediated immunity	41/361	499/18493	6.90041e-15	2.76107e-13	2.10453e-13	DOCK2/ITGAM/RETN/GMFG/CD33/MMP9/FGR/LILRB2/PTPRC/CXCR1/FCER1G/SIGLEC9/CD53/GPR84/MCEMP1/NCKAP1L/BIN2/SELL/TYROBP/SIGLEC14/FCN1/ITGAL/CYBB/HK3/CD68/MNDA/FPR1/ARHGAP9/CD14/CLEC12A/LYZ/LAIR1/C3AR1/FGL2/SIRPB1/FCGR2A/P2RX1/OSCAR/LILRB3/CHIT1/ITGB2	41
BP	GO:0045088	regulation of innate immune response	35/361	365/18493	7.55945e-15	2.98549e-13	2.27559e-13	TLR10/LILRB1/ITGAM/NCR3/SLAMF6/CD96/CD300LF/SH2D1A/IL18RAP/FGR/IRF4/FCRL3/FCER1G/TLR8/FCGR2B/HAVCR2/TLR7/CD209/TNIP3/AIM2/CCL5/IFNG/MARCO/GBP5/FCN1/CLEC4E/CRTAM/ICAM3/CD14/LAG3/BTK/LY96/CLEC10A/LILRA4/ITGB2	35
BP	GO:0042100	B cell proliferation	19/361	91/18493	1.0427e-14	4.0652e-13	3.09855e-13	TNFRSF13B/PTPRC/FCRL3/TNFRSF4/GPR183/FCGR2B/CD79A/MZB1/GAPT/IL7R/SASH3/NCKAP1L/MS4A1/CD38/MNDA/BTK/CD40LG/CTLA4/TNFSF13B	19
BP	GO:0071346	cellular response to interferon-gamma	25/361	178/18493	1.06446e-14	4.0975e-13	3.12317e-13	CCL17/XCL2/CCL19/IRF4/FCGR1B/IRF8/AIF1/CCL18/CCL21/CCL23/CCL3/WAS/MRC1/CCL5/IFNG/CCL3L1/GBP5/HLA-DQA1/CCL4/IL12RB1/FCGR1A/CCL14/VCAM1/HLA-DQA2/AQP4	25
BP	GO:0055074	calcium ion homeostasis	39/361	461/18493	1.27737e-14	4.85561e-13	3.70102e-13	P2RX7/CXCL11/CCR2/CCL19/CORO1A/FASLG/PTPRC/CXCR1/CXCR6/CCL21/CD4/XCR1/GPR174/CCR4/CCL23/CXCL9/LCK/CCR5/CCL3/S1PR4/FPR3/CCL5/CD52/RAMP3/CXCL13/CD38/CCR8/GPR65/CCR7/P2RY8/CXCR3/FPR1/CMKLR1/CCL14/P2RY10/C3AR1/CCRL2/PRKCB/P2RX1	39
BP	GO:0097530	granulocyte migration	22/361	134/18493	1.59901e-14	6.00318e-13	4.57571e-13	CCL17/XCL2/CXCL11/JAML/CCL19/CXCR1/FCER1G/CCL18/CCL21/CCL23/CXCL9/CCL3/NCKAP1L/CCL5/CCL3L1/CXCL13/CCR7/CCL4/CMKLR1/CCL14/C3AR1/ITGB2	22
BP	GO:0050852	T cell receptor signaling pathway	23/361	150/18493	1.84058e-14	6.82586e-13	5.20277e-13	CD28/TESPA1/TRAT1/CD3E/UBASH3A/PTPRC/CD247/CD4/LCK/CD3G/WAS/GRAP2/ZAP70/HLA-DQA1/CCR7/CD3D/LILRB4/ITK/LCP2/THEMIS/BTK/HLA-DQA2/FYB1	23
BP	GO:0045619	regulation of lymphocyte differentiation	24/361	166/18493	1.89928e-14	6.9587e-13	5.30402e-13	CD28/TESPA1/CCL19/CD80/LILRB2/IRF4/PTPRC/FCRL3/SLC46A2/ZNF683/IL7R/SASH3/NCKAP1L/CD27/IFNG/ZAP70/IL2RA/TBX21/CD2/LILRB4/IL12RB1/BTK/CTLA4/CD86	24
BP	GO:0045580	regulation of T cell differentiation	22/361	137/18493	2.57423e-14	9.20969e-13	7.01976e-13	CD28/TESPA1/CCL19/CD80/LILRB2/IRF4/PTPRC/SLC46A2/ZNF683/IL7R/SASH3/NCKAP1L/CD27/IFNG/ZAP70/IL2RA/TBX21/CD2/LILRB4/IL12RB1/CTLA4/CD86	22
BP	GO:0051250	negative regulation of lymphocyte activation	22/361	137/18493	2.57423e-14	9.20969e-13	7.01976e-13	TNFRSF13B/LILRB1/SAMSN1/TIGIT/CD80/LILRB2/SPN/FCGR2B/HAVCR2/PLA2G2D/LAX1/LST1/IL2RA/TBX21/PDCD1LG2/SLA2/MNDA/TNFAIP8L2/LAG3/BTK/CTLA4/CD86	22
BP	GO:0042113	B cell activation	31/361	303/18493	4.86783e-14	1.72129e-12	1.31199e-12	CD28/TNFRSF13B/SAMSN1/PTPRC/FCRL3/TNFRSF4/GPR183/FCGR2B/IGLL1/CD79A/BATF/MZB1/LAX1/GAPT/IL7R/SASH3/NCKAP1L/CD27/IGLL5/MS4A1/ZAP70/CD38/TBX21/SLA2/MNDA/BTK/CD40LG/VCAM1/CTLA4/PRKCB/TNFSF13B	31
BP	GO:0048247	lymphocyte chemotaxis	16/361	63/18493	5.08747e-14	1.77828e-12	1.35543e-12	CCL17/XCL2/CXCL11/CCR2/CCL19/CCL18/GPR183/CCL21/CCL23/CCL3/CCL5/CCL3L1/CXCL13/CXCR3/CCL4/CCL14	16
BP	GO:0072503	cellular divalent inorganic cation homeostasis	39/361	483/18493	5.79096e-14	2.00117e-12	1.52532e-12	P2RX7/CXCL11/CCR2/CCL19/CORO1A/FASLG/PTPRC/CXCR1/CXCR6/CCL21/CD4/XCR1/GPR174/CCR4/CCL23/CXCL9/LCK/CCR5/CCL3/S1PR4/FPR3/CCL5/CD52/RAMP3/CXCL13/CD38/CCR8/GPR65/CCR7/P2RY8/CXCR3/FPR1/CMKLR1/CCL14/P2RY10/C3AR1/CCRL2/PRKCB/P2RX1	39
BP	GO:0002822	regulation of adaptive immune response based on somatic recombination of immune receptors built from immunoglobulin superfamily domains	22/361	144/18493	7.45657e-14	2.5478e-12	1.94197e-12	CD28/P2RX7/LILRB1/CCR2/CCL19/CD80/PTPRC/FCER1G/CD4/FCGR2B/HAVCR2/CD1E/IL7R/WAS/SASH3/TBX21/CD1B/LTA/IL12RB1/FCER2/BTK/TNFSF13B	22
BP	GO:0002705	positive regulation of leukocyte mediated immunity	21/361	131/18493	1.04518e-13	3.53154e-12	2.69179e-12	CD28/P2RX7/ITGAM/NCR3/SLAMF6/SH2D1A/IL18RAP/FGR/PTPRC/FCER1G/CD1E/SASH3/TBX21/CRTAM/CD1B/LTA/IL12RB1/FCER2/LAG3/BTK/ITGB2	21
BP	GO:0034341	response to interferon-gamma	25/361	198/18493	1.28967e-13	4.30978e-12	3.28498e-12	CCL17/XCL2/CCL19/IRF4/FCGR1B/IRF8/AIF1/CCL18/CCL21/CCL23/CCL3/WAS/MRC1/CCL5/IFNG/CCL3L1/GBP5/HLA-DQA1/CCL4/IL12RB1/FCGR1A/CCL14/VCAM1/HLA-DQA2/AQP4	25
BP	GO:0071887	leukocyte apoptotic process	19/361	107/18493	2.35084e-13	7.77054e-12	5.92282e-12	P2RX7/LILRB1/CCL19/GIMAP8/PTCRA/FASLG/FCER1G/TNFRSF4/SLC46A2/CCL21/PDCD1/CCR5/IL7R/CD3G/CD27/CCL5/IL2RA/CCR7/BTK	19
BP	GO:1903706	regulation of hemopoiesis	35/361	418/18493	4.27488e-13	1.39784e-11	1.06545e-11	CD28/TESPA1/LILRB1/SPI1/CCL19/CD80/LILRB2/IRF4/PTPRC/FCRL3/SLC46A2/CD4/FCGR2B/ZNF683/IL7R/CCL3/SASH3/NCKAP1L/CD27/TYROBP/IFNG/ZAP70/IL2RA/TBX21/CD2/LILRB4/IL12RB1/EVI2B/BTK/C1QC/CTLA4/CD86/PRKCB/GPR171/LILRB3	35
BP	GO:0045089	positive regulation of innate immune response	30/361	309/18493	5.01343e-13	1.6219e-11	1.23623e-11	TLR10/ITGAM/NCR3/SLAMF6/CD300LF/SH2D1A/IL18RAP/IRF4/FCRL3/FCER1G/TLR8/HAVCR2/TLR7/CD209/TNIP3/AIM2/CCL5/MARCO/GBP5/FCN1/CLEC4E/CRTAM/ICAM3/CD14/LAG3/BTK/LY96/CLEC10A/LILRA4/ITGB2	30
BP	GO:0043367	CD4-positive, alpha-beta T cell differentiation	16/361	74/18493	7.68557e-13	2.46019e-11	1.87519e-11	SLAMF6/CCL19/CD80/IRF4/GPR183/SPN/FUT7/BATF/PLA2G2D/SASH3/NCKAP1L/IFNG/TBX21/IL12RB1/CD86/LY9	16
BP	GO:0002237	response to molecule of bacterial origin	31/361	337/18493	8.52419e-13	2.67247e-11	2.037e-11	P2RX7/LILRB1/CXCL11/CD80/CD96/LILRB2/FASLG/IRF8/CD6/SELP/LY86/FCGR2B/HAVCR2/CXCL9/CCR5/TNIP3/CCL3/MRC1/CCL5/CXCL13/CCR7/PDCD1LG2/LTA/IL10RA/CD14/HAMP/VCAM1/LY96/STAP1/CD86/CSF2RB	31
BP	GO:2000106	regulation of leukocyte apoptotic process	17/361	87/18493	8.5245e-13	2.67247e-11	2.037e-11	P2RX7/LILRB1/CCL19/GIMAP8/PTCRA/FCER1G/TNFRSF4/SLC46A2/CCL21/PDCD1/CCR5/IL7R/CD3G/CD27/CCL5/CCR7/BTK	17
BP	GO:0031343	positive regulation of cell killing	15/361	64/18493	1.14298e-12	3.54675e-11	2.70338e-11	P2RX7/NCR3/SLAMF6/SH2D1A/IL18RAP/PTPRC/CD1E/IFNG/CRTAM/CD1B/IL12RB1/PRF1/FCER2/LAG3/STAP1	15
BP	GO:0001910	regulation of leukocyte mediated cytotoxicity	16/361	76/18493	1.19443e-12	3.66895e-11	2.79653e-11	P2RX7/LILRB1/NCR3/SLAMF6/SH2D1A/IL18RAP/PTPRC/FCGR2B/HAVCR2/CD1E/IL7R/CRTAM/CD1B/IL12RB1/LAG3/STAP1	16
BP	GO:0019722	calcium-mediated signaling	25/361	220/18493	1.43405e-12	4.36095e-11	3.32398e-11	P2RX7/CCR2/TRAT1/PLEK/CD3E/PTPRC/CXCR1/CXCR6/SELP/CD4/XCR1/CCR4/CCR5/CCL3/P2RY12/ZAP70/CCR8/CCR7/SLA2/CXCR3/CCL4/CMKLR1/BTK/VCAM1/CCRL2	25
BP	GO:0032496	response to lipopolysaccharide	30/361	324/18493	1.70964e-12	5.14755e-11	3.92354e-11	P2RX7/LILRB1/CXCL11/CD80/CD96/LILRB2/FASLG/IRF8/CD6/SELP/LY86/HAVCR2/CXCL9/CCR5/TNIP3/CCL3/MRC1/CCL5/CXCL13/CCR7/PDCD1LG2/LTA/IL10RA/CD14/HAMP/VCAM1/LY96/STAP1/CD86/CSF2RB	30
BP	GO:0046634	regulation of alpha-beta T cell activation	17/361	91/18493	1.8445e-12	5.47988e-11	4.17684e-11	CD28/LILRB1/CCR2/CCL19/CD80/CD3E/IRF4/PTPRC/RASAL3/ZNF683/SASH3/NCKAP1L/IFNG/ZAP70/TBX21/IL12RB1/CD86	17
BP	GO:0002292	T cell differentiation involved in immune response	15/361	66/18493	1.85606e-12	5.47988e-11	4.17684e-11	SLAMF6/CCL19/CD80/IRF4/FCER1G/GPR183/SPN/BATF/IFNG/TBX21/CLEC4E/IL12RB1/EOMES/CD86/LY9	15
BP	GO:0002708	positive regulation of lymphocyte mediated immunity	18/361	105/18493	1.90047e-12	5.55706e-11	4.23567e-11	CD28/P2RX7/NCR3/SLAMF6/SH2D1A/IL18RAP/PTPRC/FCER1G/CD1E/SASH3/TBX21/CRTAM/CD1B/LTA/IL12RB1/FCER2/LAG3/BTK	18
BP	GO:0050727	regulation of inflammatory response	34/361	425/18493	3.39409e-12	9.82994e-11	7.49252e-11	CD28/SUCNR1/TLR10/CD200R1/CCR2/ITGAM/VTN/MMP9/PTPRC/CD6/FCER1G/CCL18/FCGR2B/TLR7/CCL3/CCL5/CCL3L1/GBP5/IL2RA/C1S/SIGLEC10/CCR7/LTA/CCL14/TNFAIP8L2/C1QA/BTK/APOD/C1QC/C3AR1/STAP1/ABCD2/C1QB/ITGB2	34
BP	GO:0050663	cytokine secretion	24/361	210/18493	3.59662e-12	1.03182e-10	7.8647e-11	P2RX7/TLR10/CD200R1/LILRB1/CCL19/FGR/TNFRSF4/TLR8/FCGR2B/HAVCR2/CCL3/AIM2/SRGN/GBP5/FCN1/CSF1R/CCR7/CD2/CLEC4E/CRTAM/LCP2/CLECL1/CD14/CD244	24
BP	GO:0032649	regulation of interferon-gamma production	17/361	95/18493	3.83479e-12	1.08987e-10	8.30714e-11	LILRB1/CCR2/SLAMF6/CD96/CD3E/IRF8/TLR8/HAVCR2/TLR7/SASH3/CCR7/CD2/PDCD1LG2/LTA/IL12RB1/CD14/CD244	17
BP	GO:0032945	negative regulation of mononuclear cell proliferation	15/361	70/18493	4.64898e-12	1.29702e-10	9.8861e-11	TNFRSF13B/LILRB1/CD80/LILRB2/SPN/FCGR2B/HAVCR2/PLA2G2D/LST1/IL2RA/PDCD1LG2/MNDA/BTK/CTLA4/CD86	15
BP	GO:0050672	negative regulation of lymphocyte proliferation	15/361	70/18493	4.64898e-12	1.29702e-10	9.8861e-11	TNFRSF13B/LILRB1/CD80/LILRB2/SPN/FCGR2B/HAVCR2/PLA2G2D/LST1/IL2RA/PDCD1LG2/MNDA/BTK/CTLA4/CD86	15
BP	GO:0030888	regulation of B cell proliferation	14/361	59/18493	5.45453e-12	1.49435e-10	1.13901e-10	TNFRSF13B/PTPRC/FCRL3/TNFRSF4/GPR183/FCGR2B/MZB1/SASH3/NCKAP1L/CD38/MNDA/BTK/CTLA4/TNFSF13B	14
BP	GO:0072678	T cell migration	14/361	59/18493	5.45453e-12	1.49435e-10	1.13901e-10	XCL2/CD200R1/CXCL11/CCR2/AIF1/GPR183/CCL21/SPN/CCL3/CCL5/ZAP70/CXCL13/CXCR3/APOD	14
BP	GO:0071674	mononuclear cell migration	16/361	85/18493	7.39903e-12	2.00897e-10	1.53127e-10	CCL17/XCL2/CCR2/JAML/CCL19/AIF1/CCL18/CCL21/CCL23/CCL3/CCL5/CCL3L1/CCL4/CMKLR1/CCL14/C3AR1	16
BP	GO:0002824	positive regulation of adaptive immune response based on somatic recombination of immune receptors built from immunoglobulin superfamily domains	17/361	100/18493	9.10028e-12	2.44902e-10	1.86668e-10	CD28/P2RX7/CCR2/CCL19/CD80/PTPRC/FCER1G/CD4/CD1E/SASH3/TBX21/CD1B/LTA/IL12RB1/FCER2/BTK/TNFSF13B	17
BP	GO:0035710	CD4-positive, alpha-beta T cell activation	16/361	87/18493	1.07511e-11	2.8679e-10	2.18596e-10	SLAMF6/CCL19/CD80/IRF4/GPR183/SPN/FUT7/BATF/PLA2G2D/SASH3/NCKAP1L/IFNG/TBX21/IL12RB1/CD86/LY9	16
BP	GO:0002228	natural killer cell mediated immunity	14/361	62/18493	1.13118e-11	2.94259e-10	2.24288e-10	LILRB1/NCR3/SLAMF6/CD96/SH2D1A/KLRD1/CORO1A/IL18RAP/KLRC2/HAVCR2/SLAMF7/GZMB/CRTAM/LAG3	14
BP	GO:0032623	interleukin-2 production	14/361	62/18493	1.13118e-11	2.94259e-10	2.24288e-10	CD28/CCR2/CD80/CD3E/IRF4/PTPRC/FCER1G/CD247/CD4/HAVCR2/SASH3/TBX21/LAG3/CD86	14
BP	GO:0006959	humoral immune response	30/361	349/18493	1.13214e-11	2.94259e-10	2.24288e-10	CD28/GNLY/CXCL11/CCR2/POU2AF1/SH2D1A/VTN/PTPRC/GPR183/LY86/FCGR2B/IGLL1/PDCD1/CXCL9/VSIG4/JCHAIN/IGLL5/IFNG/MS4A1/CXCL13/C1S/FCN1/CCR7/LTA/FCER2/C1QA/LYZ/C1QC/C3AR1/C1QB	30
BP	GO:0070664	negative regulation of leukocyte proliferation	15/361	75/18493	1.34482e-11	3.46576e-10	2.64165e-10	TNFRSF13B/LILRB1/CD80/LILRB2/SPN/FCGR2B/HAVCR2/PLA2G2D/LST1/IL2RA/PDCD1LG2/MNDA/BTK/CTLA4/CD86	15
BP	GO:0002821	positive regulation of adaptive immune response	17/361	105/18493	2.05279e-11	5.24581e-10	3.99844e-10	CD28/P2RX7/CCR2/CCL19/CD80/PTPRC/FCER1G/CD4/CD1E/SASH3/TBX21/CD1B/LTA/IL12RB1/FCER2/BTK/TNFSF13B	17
BP	GO:0045621	positive regulation of lymphocyte differentiation	16/361	94/18493	3.67981e-11	9.32524e-10	7.10784e-10	TESPA1/CCL19/CD80/LILRB2/PTPRC/IL7R/SASH3/NCKAP1L/CD27/IFNG/ZAP70/IL2RA/LILRB4/IL12RB1/BTK/CD86	16
BP	GO:0071356	cellular response to tumor necrosis factor	24/361	235/18493	3.99066e-11	1.00294e-09	7.64457e-10	CCL17/TNFRSF13B/XCL2/CCL19/TNFRSF4/CCL18/CCL21/CCL23/CCL3/AIM2/CD27/CCL5/CCL3L1/TNFRSF9/TNFRSF17/CCL4/LTA/CCL14/TCL1A/CD40LG/HAMP/VCAM1/TNFSF13B/MYOD1	24
BP	GO:0034612	response to tumor necrosis factor	25/361	257/18493	4.47775e-11	1.11613e-09	8.50734e-10	CCL17/TNFRSF13B/XCL2/CCL19/TNFRSF4/CCL18/CCL21/CCL23/CCL3/AIM2/CD27/CCL5/CCL3L1/TNFRSF9/TNFRSF17/CCL4/LTA/CCL14/TCL1A/CD14/CD40LG/HAMP/VCAM1/TNFSF13B/MYOD1	25
BP	GO:0045582	positive regulation of T cell differentiation	15/361	83/18493	6.22925e-11	1.54009e-09	1.17388e-09	TESPA1/CCL19/CD80/LILRB2/PTPRC/IL7R/SASH3/NCKAP1L/CD27/IFNG/ZAP70/IL2RA/LILRB4/IL12RB1/CD86	15
BP	GO:0050864	regulation of B cell activation	21/361	183/18493	7.66742e-11	1.88037e-09	1.43325e-09	CD28/TNFRSF13B/SAMSN1/PTPRC/FCRL3/TNFRSF4/GPR183/FCGR2B/IGLL1/MZB1/SASH3/NCKAP1L/CD27/IGLL5/CD38/TBX21/SLA2/MNDA/BTK/CTLA4/TNFSF13B	21
BP	GO:0050707	regulation of cytokine secretion	21/361	184/18493	8.50294e-11	2.0686e-09	1.57671e-09	P2RX7/TLR10/CD200R1/LILRB1/CCL19/FGR/TNFRSF4/TLR8/FCGR2B/HAVCR2/CCL3/AIM2/SRGN/FCN1/CSF1R/CCR7/CD2/CLEC4E/CRTAM/CD14/CD244	21
BP	GO:0002287	alpha-beta T cell activation involved in immune response	13/361	60/18493	1.08869e-10	2.60686e-09	1.98699e-09	SLAMF6/CCL19/CD80/IRF4/GPR183/SPN/BATF/IFNG/TBX21/IL12RB1/EOMES/CD86/LY9	13
BP	GO:0002293	alpha-beta T cell differentiation involved in immune response	13/361	60/18493	1.08869e-10	2.60686e-09	1.98699e-09	SLAMF6/CCL19/CD80/IRF4/GPR183/SPN/BATF/IFNG/TBX21/IL12RB1/EOMES/CD86/LY9	13
BP	GO:0071219	cellular response to molecule of bacterial origin	22/361	206/18493	1.10934e-10	2.63556e-09	2.00886e-09	LILRB1/CXCL11/CD80/LILRB2/IRF8/CD6/LY86/FCGR2B/HAVCR2/CXCL9/CCR5/TNIP3/CCL3/MRC1/CCL5/CXCL13/PDCD1LG2/CD14/HAMP/LY96/STAP1/CD86	22
BP	GO:0050729	positive regulation of inflammatory response	18/361	133/18493	1.14613e-10	2.70185e-09	2.05939e-09	CD28/SUCNR1/TLR10/CCR2/ITGAM/CD6/FCER1G/CCL18/TLR7/CCL3/CCL3L1/GBP5/CCR7/LTA/CCL14/BTK/STAP1/ITGB2	18
BP	GO:0046635	positive regulation of alpha-beta T cell activation	13/361	61/18493	1.35941e-10	3.17997e-09	2.42382e-09	CD28/CCR2/CCL19/CD80/CD3E/PTPRC/RASAL3/SASH3/NCKAP1L/IFNG/ZAP70/IL12RB1/CD86	13
BP	GO:0071216	cellular response to biotic stimulus	23/361	229/18493	1.43933e-10	3.34121e-09	2.54672e-09	LILRB1/CXCL11/CD80/LILRB2/IRF8/CD6/LY86/FCGR2B/HAVCR2/CXCL9/CCR5/TNIP3/CCL3/MRC1/CCL5/CXCL13/PDCD1LG2/CD14/BTK/HAMP/LY96/STAP1/CD86	23
BP	GO:0001776	leukocyte homeostasis	15/361	88/18493	1.48724e-10	3.4263e-09	2.61157e-09	P2RX7/TNFRSF13B/CCR2/CORO1A/FCER1G/TNFRSF4/GPR183/SLC46A2/SIT1/GPR174/GAPT/NCKAP1L/IL2RA/TNFRSF17/TNFSF13B	15
BP	GO:0019932	second-messenger-mediated signaling	32/361	439/18493	1.68257e-10	3.84714e-09	2.93235e-09	P2RX7/CXCL11/CCR2/TRAT1/PLEK/CD3E/PTPRC/CXCR1/CXCR6/SELP/CD4/XCR1/CCR4/CXCL9/CCR5/CCL3/S1PR4/P2RY12/RAMP3/ZAP70/CCR8/GPR65/CCR7/SLA2/CXCR3/CCL4/FPR1/CMKLR1/BTK/VCAM1/CCRL2/GCGR	32
BP	GO:2000107	negative regulation of leukocyte apoptotic process	12/361	51/18493	2.04408e-10	4.63884e-09	3.53579e-09	LILRB1/CCL19/PTCRA/FCER1G/TNFRSF4/SLC46A2/CCL21/CCR5/IL7R/CD27/CCL5/CCR7	12
BP	GO:1903557	positive regulation of tumor necrosis factor superfamily cytokine production	14/361	76/18493	2.08818e-10	4.67849e-09	3.56601e-09	CCR2/CCL19/PTPRC/FCER1G/SPN/HAVCR2/CCL3/SASH3/IFNG/CYBB/CD2/CD14/LY96/CD86	14
BP	GO:0032729	positive regulation of interferon-gamma production	13/361	63/18493	2.09232e-10	4.67849e-09	3.56601e-09	CCR2/SLAMF6/CD3E/IRF8/TLR8/HAVCR2/TLR7/SASH3/CD2/LTA/IL12RB1/CD14/CD244	13
BP	GO:1903038	negative regulation of leukocyte cell-cell adhesion	17/361	122/18493	2.37879e-10	5.26843e-09	4.01568e-09	LILRB1/TIGIT/CD80/LILRB2/CCL21/SPN/FCGR2B/HAVCR2/PLA2G2D/LAX1/IL2RA/TBX21/PDCD1LG2/TNFAIP8L2/LAG3/CTLA4/CD86	17
BP	GO:0050868	negative regulation of T cell activation	16/361	106/18493	2.3908e-10	5.26843e-09	4.01568e-09	LILRB1/TIGIT/CD80/LILRB2/SPN/FCGR2B/HAVCR2/PLA2G2D/LAX1/IL2RA/TBX21/PDCD1LG2/TNFAIP8L2/LAG3/CTLA4/CD86	16
BP	GO:0002548	monocyte chemotaxis	13/361	64/18493	2.57985e-10	5.64411e-09	4.30203e-09	CCL17/XCL2/CCR2/CCL19/AIF1/CCL18/CCL21/CCL23/CCL3/CCL5/CCL3L1/CCL4/CCL14	13
BP	GO:0032663	regulation of interleukin-2 production	12/361	53/18493	3.31662e-10	7.20417e-09	5.49112e-09	CD28/CCR2/CD80/CD3E/IRF4/PTPRC/CD4/HAVCR2/SASH3/TBX21/LAG3/CD86	12
BP	GO:1902107	positive regulation of leukocyte differentiation	18/361	142/18493	3.43884e-10	7.41668e-09	5.6531e-09	TESPA1/CCL19/CD80/LILRB2/PTPRC/CD4/IL7R/SASH3/NCKAP1L/CD27/IFNG/ZAP70/IL2RA/LILRB4/IL12RB1/EVI2B/BTK/CD86	18
BP	GO:0071222	cellular response to lipopolysaccharide	21/361	199/18493	3.70616e-10	7.93692e-09	6.04963e-09	LILRB1/CXCL11/CD80/LILRB2/IRF8/CD6/LY86/HAVCR2/CXCL9/CCR5/TNIP3/CCL3/MRC1/CCL5/CXCL13/PDCD1LG2/CD14/HAMP/LY96/STAP1/CD86	21
BP	GO:0002685	regulation of leukocyte migration	20/361	180/18493	3.90724e-10	8.30904e-09	6.33327e-09	XCL2/CD200R1/CCR2/CCL19/AIF1/SELP/CCL21/SPN/CCL3/NCKAP1L/CCL5/P2RY12/CXCL13/CCR7/CXCR3/CCL4/CMKLR1/APOD/C3AR1/STAP1	20
BP	GO:0032633	interleukin-4 production	10/361	33/18493	4.40662e-10	9.30593e-09	7.09312e-09	CD28/CD3E/IRF4/FCER1G/HAVCR2/SASH3/ITK/CLECL1/CD40LG/CD86	10
BP	GO:0001912	positive regulation of leukocyte mediated cytotoxicity	12/361	55/18493	5.26621e-10	1.10445e-08	8.4183e-09	P2RX7/NCR3/SLAMF6/SH2D1A/IL18RAP/PTPRC/CD1E/CRTAM/CD1B/IL12RB1/LAG3/STAP1	12
BP	GO:0050921	positive regulation of chemotaxis	17/361	130/18493	6.55225e-10	1.36475e-08	1.04024e-08	SUCNR1/XCL2/CCR2/CCL19/AIF1/CCL21/IL16/CCR4/CCL3/NCKAP1L/CCL5/P2RY12/CXCL13/CCR7/CCL4/CMKLR1/C3AR1	17
BP	GO:1903555	regulation of tumor necrosis factor superfamily cytokine production	17/361	131/18493	7.3971e-10	1.52538e-08	1.16267e-08	LILRB1/CCR2/CCL19/PTPRC/FCER1G/SPN/HAVCR2/CCL3/SASH3/IFNG/CYBB/SLAMF1/CD2/CD14/LY96/CD86/LILRA4	17
BP	GO:0043383	negative T cell selection	7/361	12/18493	7.42376e-10	1.52538e-08	1.16267e-08	CD28/DOCK2/CD3E/PTPRC/ZAP70/CCR7/THEMIS	7
BP	GO:0042108	positive regulation of cytokine biosynthetic process	12/361	57/18493	8.19715e-10	1.67299e-08	1.27518e-08	CD28/CCR2/CD80/CD3E/IRF4/PTPRC/TLR8/CD4/SPN/TLR7/CYBB/CD86	12
BP	GO:0071706	tumor necrosis factor superfamily cytokine production	17/361	135/18493	1.18829e-09	2.40906e-08	1.83622e-08	LILRB1/CCR2/CCL19/PTPRC/FCER1G/SPN/HAVCR2/CCL3/SASH3/IFNG/CYBB/SLAMF1/CD2/CD14/LY96/CD86/LILRA4	17
BP	GO:0070227	lymphocyte apoptotic process	13/361	72/18493	1.20966e-09	2.43613e-08	1.85686e-08	P2RX7/GIMAP8/PTCRA/FASLG/TNFRSF4/SLC46A2/PDCD1/IL7R/CD3G/CD27/CCL5/IL2RA/BTK	13
BP	GO:0045076	regulation of interleukin-2 biosynthetic process	8/361	19/18493	1.22303e-09	2.44685e-08	1.86503e-08	CD28/CD80/CD3E/IRF4/PTPRC/CD4/LAG3/CD86	8
BP	GO:0002294	CD4-positive, alpha-beta T cell differentiation involved in immune response	12/361	59/18493	1.25272e-09	2.48989e-08	1.89783e-08	SLAMF6/CCL19/CD80/IRF4/GPR183/SPN/BATF/IFNG/TBX21/IL12RB1/CD86/LY9	12
BP	GO:0002456	T cell mediated immunity	15/361	102/18493	1.27655e-09	2.5134e-08	1.91575e-08	P2RX7/LILRB1/IL18RAP/PTPRC/FCGR2B/CD1E/GZMM/IL7R/WAS/SASH3/TBX21/CD1B/IL12RB1/PRF1/CD8A	15
BP	GO:0010818	T cell chemotaxis	9/361	27/18493	1.28108e-09	2.5134e-08	1.91575e-08	XCL2/CXCL11/CCR2/GPR183/CCL21/CCL3/CCL5/CXCL13/CXCR3	9
BP	GO:0001771	immunological synapse formation	7/361	13/18493	1.58156e-09	3.06339e-08	2.33496e-08	DOCK2/CCL19/CD6/CCL21/HAVCR2/CCR7/PRF1	7
BP	GO:0045086	positive regulation of interleukin-2 biosynthetic process	7/361	13/18493	1.58156e-09	3.06339e-08	2.33496e-08	CD28/CD80/CD3E/IRF4/PTPRC/CD4/CD86	7
BP	GO:0002687	positive regulation of leukocyte migration	16/361	121/18493	1.77861e-09	3.42327e-08	2.60926e-08	XCL2/CCR2/CCL19/AIF1/SELP/CCL21/SPN/CCL3/NCKAP1L/CCL5/P2RY12/CXCL13/CCR7/CCL4/CMKLR1/C3AR1	16
BP	GO:0070374	positive regulation of ERK1 and ERK2 cascade	22/361	245/18493	3.04651e-09	5.82669e-08	4.44119e-08	CCL17/XCL2/CCL19/PTPRC/CCL18/GPR183/CCL21/CD4/HAVCR2/CCL23/CCL3/CCL5/RAMP3/CCL3L1/MARCO/CSF1R/CCR7/SLAMF1/CCL4/CCL14/SCIMP/EPHA8	22
BP	GO:0045061	thymic T cell selection	8/361	21/18493	3.18214e-09	6.04805e-08	4.60991e-08	CD28/DOCK2/CD3E/PTPRC/CD3G/ZAP70/CCR7/CD3D	8
BP	GO:0002260	lymphocyte homeostasis	12/361	64/18493	3.36666e-09	6.35901e-08	4.84693e-08	P2RX7/TNFRSF13B/CORO1A/TNFRSF4/SLC46A2/SIT1/GPR174/GAPT/NCKAP1L/IL2RA/TNFRSF17/TNFSF13B	12
BP	GO:0032743	positive regulation of interleukin-2 production	9/361	30/18493	3.7135e-09	6.97084e-08	5.31328e-08	CD28/CCR2/CD80/CD3E/IRF4/PTPRC/CD4/SASH3/CD86	9
BP	GO:0042035	regulation of cytokine biosynthetic process	14/361	94/18493	3.85489e-09	7.19185e-08	5.48173e-08	CD28/LILRB1/CCR2/CD80/CD3E/IRF4/PTPRC/TLR8/CD4/SPN/TLR7/CYBB/LAG3/CD86	14
BP	GO:0038093	Fc receptor signaling pathway	19/361	187/18493	4.87949e-09	9.04788e-08	6.89643e-08	CD200R1/FGR/FCGR1B/PTPRC/FCER1G/CD247/FCGR2B/FCGR3A/CD3G/WAS/NCKAP1L/GRAP2/CLEC4E/ITK/FCGR1A/LCP2/BTK/FCGR2A/LILRA4	19
BP	GO:0042094	interleukin-2 biosynthetic process	8/361	22/18493	4.91581e-09	9.05998e-08	6.90565e-08	CD28/CD80/CD3E/IRF4/PTPRC/CD4/LAG3/CD86	8
BP	GO:0002218	activation of innate immune response	22/361	252/18493	5.14111e-09	9.41815e-08	7.17865e-08	TLR10/ITGAM/CD300LF/IRF4/FCRL3/FCER1G/TLR8/HAVCR2/TLR7/CD209/TNIP3/AIM2/MARCO/FCN1/CLEC4E/ICAM3/CD14/BTK/LY96/CLEC10A/LILRA4/ITGB2	22
BP	GO:0002758	innate immune response-activating signal transduction	21/361	233/18493	6.55833e-09	1.19424e-07	9.10271e-08	TLR10/ITGAM/CD300LF/IRF4/FCRL3/FCER1G/TLR8/HAVCR2/TLR7/CD209/TNIP3/MARCO/FCN1/CLEC4E/ICAM3/CD14/BTK/LY96/CLEC10A/LILRA4/ITGB2	21
BP	GO:0001818	negative regulation of cytokine production	22/361	256/18493	6.87502e-09	1.24446e-07	9.48546e-08	CD200R1/LILRB1/TIGIT/CD96/PTPRC/TNFRSF4/TLR8/FCGR2B/HAVCR2/NCKAP1L/SRGN/IFNG/CD84/TBX21/SLAMF1/PDCD1LG2/CMKLR1/LAG3/BTK/APOD/ABCD2/LILRA4	22
BP	GO:0002407	dendritic cell chemotaxis	8/361	23/18493	7.40993e-09	1.32551e-07	1.01032e-07	CCR2/CCL19/CXCR1/GPR183/CCL21/CCR5/CCL5/CCR7	8
BP	GO:0032753	positive regulation of interleukin-4 production	8/361	23/18493	7.40993e-09	1.32551e-07	1.01032e-07	CD28/CD3E/IRF4/FCER1G/HAVCR2/SASH3/CD40LG/CD86	8
BP	GO:0019724	B cell mediated immunity	20/361	213/18493	7.51221e-09	1.33594e-07	1.01828e-07	CD28/PTPRC/FCER1G/TLR8/FCGR2B/IGLL1/BATF/GAPT/CD27/IGLL5/C1S/TBX21/SLA2/LTA/FCER2/C1QA/BTK/CD40LG/C1QC/C1QB	20
BP	GO:0002690	positive regulation of leukocyte chemotaxis	13/361	84/18493	8.64492e-09	1.52844e-07	1.165e-07	XCL2/CCR2/CCL19/AIF1/CCL21/CCL3/NCKAP1L/CCL5/CXCL13/CCR7/CCL4/CMKLR1/C3AR1	13
BP	GO:0002295	T-helper cell lineage commitment	7/361	16/18493	1.00234e-08	1.76191e-07	1.34295e-07	SLAMF6/IRF4/SPN/BATF/TBX21/IL12RB1/LY9	7
BP	GO:0042093	T-helper cell differentiation	11/361	57/18493	1.11371e-08	1.92432e-07	1.46674e-07	SLAMF6/CCL19/CD80/IRF4/GPR183/SPN/BATF/TBX21/IL12RB1/CD86/LY9	11
BP	GO:0050854	regulation of antigen receptor-mediated signaling pathway	11/361	57/18493	1.11371e-08	1.92432e-07	1.46674e-07	TESPA1/BLK/TRAT1/UBASH3A/PTPRC/FCRL3/LCK/CCR7/LILRB4/STAP1/PRKCB	11
BP	GO:0070228	regulation of lymphocyte apoptotic process	11/361	57/18493	1.11371e-08	1.92432e-07	1.46674e-07	P2RX7/GIMAP8/PTCRA/TNFRSF4/SLC46A2/PDCD1/IL7R/CD3G/CD27/CCL5/BTK	11
BP	GO:0002573	myeloid leukocyte differentiation	19/361	197/18493	1.15546e-08	1.98517e-07	1.51312e-07	LILRB1/SPI1/CCL19/MMP9/IRF4/FCER1G/GPR183/CD4/BATF/CCL3/TYROBP/IFNG/CSF1R/CCR7/LILRB4/EVI2B/C1QC/OSCAR/LILRB3	19
BP	GO:0042267	natural killer cell mediated cytotoxicity	11/361	58/18493	1.3506e-08	2.3074e-07	1.75873e-07	LILRB1/NCR3/SLAMF6/SH2D1A/CORO1A/IL18RAP/HAVCR2/SLAMF7/GZMB/CRTAM/LAG3	11
BP	GO:0050853	B cell receptor signaling pathway	15/361	122/18493	1.58259e-08	2.68863e-07	2.04931e-07	BLK/PTPRC/FCRL3/IGLL1/CD79A/LCK/NCKAP1L/IGLL5/CD38/MNDA/ITK/BTK/STAP1/CTLA4/PRKCB	15
BP	GO:0032760	positive regulation of tumor necrosis factor production	12/361	73/18493	1.60973e-08	2.71955e-07	2.07288e-07	CCR2/CCL19/PTPRC/FCER1G/SPN/HAVCR2/CCL3/SASH3/CYBB/CD2/CD14/LY96	12
BP	GO:2000401	regulation of lymphocyte migration	11/361	59/18493	1.6314e-08	2.74094e-07	2.08918e-07	XCL2/CD200R1/CCR2/AIF1/CCL21/SPN/CCL3/CCL5/CXCL13/CCL4/APOD	11
BP	GO:0042089	cytokine biosynthetic process	14/361	105/18493	1.67174e-08	2.78422e-07	2.12218e-07	CD28/LILRB1/CCR2/CD80/CD3E/IRF4/PTPRC/TLR8/CD4/SPN/TLR7/CYBB/LAG3/CD86	14
BP	GO:0043373	CD4-positive, alpha-beta T cell lineage commitment	7/361	17/18493	1.67548e-08	2.78422e-07	2.12218e-07	SLAMF6/IRF4/SPN/BATF/TBX21/IL12RB1/LY9	7
BP	GO:0042107	cytokine metabolic process	14/361	106/18493	1.89249e-08	3.12776e-07	2.38402e-07	CD28/LILRB1/CCR2/CD80/CD3E/IRF4/PTPRC/TLR8/CD4/SPN/TLR7/CYBB/LAG3/CD86	14
BP	GO:0048872	homeostasis of number of cells	21/361	248/18493	1.97362e-08	3.2442e-07	2.47278e-07	P2RX7/TNFRSF13B/CCR2/SPI1/CORO1A/FCER1G/TNFRSF4/GPR183/SLC46A2/SIT1/IKZF1/GPR174/CCR4/GAPT/IL7R/SASH3/NCKAP1L/IL2RA/CCR7/TNFRSF17/TNFSF13B	21
BP	GO:1903708	positive regulation of hemopoiesis	18/361	183/18493	2.07401e-08	3.39089e-07	2.58459e-07	TESPA1/CCL19/CD80/LILRB2/PTPRC/CD4/IL7R/SASH3/NCKAP1L/CD27/IFNG/ZAP70/IL2RA/LILRB4/IL12RB1/EVI2B/BTK/CD86	18
BP	GO:0006898	receptor-mediated endocytosis	25/361	346/18493	2.14699e-08	3.49144e-07	2.66123e-07	CD5/ASGR2/LILRB1/CCL19/VTN/CD163/FCGR1B/CD6/CXCR1/FCER1G/MSR1/HPR/CCL21/FCGR2B/STAB1/APOC2/MRC1/JCHAIN/RAMP3/MARCO/APOC1/FCGR1A/CD14/FOLR2/ITGB2	25
BP	GO:2000403	positive regulation of lymphocyte migration	9/361	36/18493	2.20351e-08	3.56429e-07	2.71675e-07	XCL2/CCR2/AIF1/CCL21/SPN/CCL3/CCL5/CXCL13/CCL4	9
BP	GO:0036336	dendritic cell migration	8/361	26/18493	2.24312e-08	3.60918e-07	2.75097e-07	CCR2/CCL19/CXCR1/GPR183/CCL21/CCR5/CCL5/CCR7	8
BP	GO:0045060	negative thymic T cell selection	6/361	11/18493	2.2586e-08	3.61494e-07	2.75536e-07	CD28/DOCK2/CD3E/PTPRC/ZAP70/CCR7	6
BP	GO:0002688	regulation of leukocyte chemotaxis	14/361	109/18493	2.72257e-08	4.33473e-07	3.30399e-07	XCL2/CCR2/CCL19/AIF1/CCL21/CCL3/NCKAP1L/CCL5/CXCL13/CCR7/CCL4/CMKLR1/C3AR1/STAP1	14
BP	GO:0032680	regulation of tumor necrosis factor production	15/361	127/18493	2.74571e-08	4.3488e-07	3.31472e-07	LILRB1/CCR2/CCL19/PTPRC/FCER1G/SPN/HAVCR2/CCL3/SASH3/CYBB/SLAMF1/CD2/CD14/LY96/LILRA4	15
BP	GO:0032673	regulation of interleukin-4 production	8/361	27/18493	3.13366e-08	4.93754e-07	3.76347e-07	CD28/CD3E/IRF4/FCER1G/HAVCR2/SASH3/CD40LG/CD86	8
BP	GO:0050920	regulation of chemotaxis	19/361	210/18493	3.27169e-08	5.12846e-07	3.90899e-07	SUCNR1/XCL2/CCR2/CCL19/AIF1/GPR183/CCL21/IL16/CCR4/CCL3/NCKAP1L/CCL5/P2RY12/CXCL13/CCR7/CCL4/CMKLR1/C3AR1/STAP1	19
BP	GO:0046637	regulation of alpha-beta T cell differentiation	11/361	63/18493	3.34763e-08	5.22059e-07	3.97921e-07	CCL19/CD80/IRF4/ZNF683/SASH3/NCKAP1L/IFNG/ZAP70/TBX21/IL12RB1/CD86	11
BP	GO:0032640	tumor necrosis factor production	15/361	129/18493	3.39732e-08	5.27105e-07	4.01767e-07	LILRB1/CCR2/CCL19/PTPRC/FCER1G/SPN/HAVCR2/CCL3/SASH3/CYBB/SLAMF1/CD2/CD14/LY96/LILRA4	15
BP	GO:0001913	T cell mediated cytotoxicity	10/361	50/18493	3.64071e-08	5.56351e-07	4.24059e-07	P2RX7/LILRB1/PTPRC/FCGR2B/CD1E/GZMM/IL7R/CD1B/IL12RB1/PRF1	10
BP	GO:0032655	regulation of interleukin-12 production	10/361	50/18493	3.64071e-08	5.56351e-07	4.24059e-07	LILRB1/CCL19/TIGIT/IRF8/TLR8/IFNG/CCR7/SLAMF1/CMKLR1/CD40LG	10
BP	GO:0070231	T cell apoptotic process	10/361	50/18493	3.64071e-08	5.56351e-07	4.24059e-07	GIMAP8/PTCRA/FASLG/TNFRSF4/SLC46A2/PDCD1/IL7R/CD27/CCL5/IL2RA	10
BP	GO:0016064	immunoglobulin mediated immune response	19/361	212/18493	3.81177e-08	5.79579e-07	4.41764e-07	CD28/PTPRC/FCER1G/TLR8/FCGR2B/IGLL1/BATF/GAPT/CD27/IGLL5/C1S/TBX21/LTA/FCER2/C1QA/BTK/CD40LG/C1QC/C1QB	19
BP	GO:0022408	negative regulation of cell-cell adhesion	17/361	170/18493	4.02638e-08	6.09165e-07	4.64314e-07	LILRB1/TIGIT/CD80/LILRB2/CCL21/SPN/FCGR2B/HAVCR2/PLA2G2D/LAX1/IL2RA/TBX21/PDCD1LG2/TNFAIP8L2/LAG3/CTLA4/CD86	17
BP	GO:0002363	alpha-beta T cell lineage commitment	7/361	19/18493	4.19709e-08	6.3185e-07	4.81605e-07	SLAMF6/IRF4/SPN/BATF/TBX21/IL12RB1/LY9	7
BP	GO:0072540	T-helper 17 cell lineage commitment	6/361	12/18493	4.44296e-08	6.65568e-07	5.07306e-07	SLAMF6/IRF4/BATF/TBX21/IL12RB1/LY9	6
BP	GO:0006816	calcium ion transport	27/361	413/18493	4.689e-08	6.98732e-07	5.32584e-07	P2RX7/LILRB1/CXCL11/CCL19/CORO1A/LILRB2/FASLG/PTPRC/FCRL3/CCL21/CD4/IL16/TRPV2/CXCL9/LCK/CCR5/CCL3/CCL5/P2RY12/RAMP3/CD84/CCR7/CCL4/PRKCB/P2RX1/TRPM5/CACNA2D2	27
BP	GO:0019835	cytolysis	9/361	39/18493	4.7103e-08	6.98732e-07	5.32584e-07	P2RX7/LILRB1/GZMH/GZMM/GZMB/GZMA/PRF1/LYZ/PAX2	9
BP	GO:0032615	interleukin-12 production	10/361	52/18493	5.41582e-08	7.99491e-07	6.09384e-07	LILRB1/CCL19/TIGIT/IRF8/TLR8/IFNG/CCR7/SLAMF1/CMKLR1/CD40LG	10
BP	GO:0002709	regulation of T cell mediated immunity	11/361	66/18493	5.5415e-08	8.14093e-07	6.20513e-07	P2RX7/LILRB1/PTPRC/FCGR2B/CD1E/IL7R/WAS/SASH3/TBX21/CD1B/IL12RB1	11
BP	GO:2000404	regulation of T cell migration	9/361	40/18493	5.97405e-08	8.73418e-07	6.65732e-07	XCL2/CD200R1/CCR2/AIF1/CCL21/SPN/CCL5/CXCL13/APOD	9
BP	GO:0019882	antigen processing and presentation	17/361	175/18493	6.18152e-08	8.99427e-07	6.85556e-07	CCL19/LILRB2/FCGR1B/FCER1G/CCL21/FCGR2B/CD1E/CD209/WAS/CTSE/HLA-DQA1/CCR7/CD1B/FCGR1A/LAG3/HLA-DQA2/CD8A	17
BP	GO:0140131	positive regulation of lymphocyte chemotaxis	7/361	20/18493	6.34917e-08	9.1942e-07	7.00795e-07	XCL2/CCR2/CCL21/CCL3/CCL5/CXCL13/CCL4	7
BP	GO:0002440	production of molecular mediator of immune response	21/361	268/18493	7.54054e-08	1.08677e-06	8.28349e-07	CD28/VPREB3/LILRB1/CD96/IL18RAP/TMIGD2/PTPRC/FCRL3/FCER1G/TNFRSF4/FCGR2B/BATF/MZB1/GAPT/IL7R/SASH3/TBX21/BTK/CD40LG/CD244/TNFSF13B	21
BP	GO:0045059	positive thymic T cell selection	6/361	13/18493	8.11564e-08	1.16414e-06	8.87321e-07	DOCK2/CD3E/PTPRC/CD3G/ZAP70/CD3D	6
BP	GO:0043369	CD4-positive or CD8-positive, alpha-beta T cell lineage commitment	7/361	21/18493	9.36465e-08	1.33074e-06	1.01431e-06	SLAMF6/IRF4/SPN/BATF/TBX21/IL12RB1/LY9	7
BP	GO:0050857	positive regulation of antigen receptor-mediated signaling pathway	7/361	21/18493	9.36465e-08	1.33074e-06	1.01431e-06	TESPA1/TRAT1/PTPRC/LCK/CCR7/STAP1/PRKCB	7
BP	GO:0043547	positive regulation of GTPase activity	26/361	405/18493	1.19908e-07	1.69601e-06	1.29272e-06	TAGAP/CCL17/XCL2/DOCK2/RASGRP2/CCL19/RGS18/ACAP1/CCL18/RASAL3/CCL21/CCL23/ARHGAP15/CCL3/NCKAP1L/CCL5/CCL3L1/CXCL13/GPR65/CCR7/CCL4/CCL14/ARHGAP9/RGS1/AGAP2/ARHGAP36	26
BP	GO:0007162	negative regulation of cell adhesion	21/361	276/18493	1.24273e-07	1.7496e-06	1.33357e-06	LILRB1/TIGIT/CD80/LILRB2/PTPRC/CCL21/SPN/FCGR2B/HAVCR2/ADAMDEC1/PLA2G2D/LAX1/IL2RA/TBX21/PDCD1LG2/TNFAIP8L2/LAG3/APOD/CTLA4/CD86/MYOC	21
BP	GO:0050715	positive regulation of cytokine secretion	14/361	123/18493	1.28053e-07	1.79451e-06	1.3678e-06	P2RX7/CCL19/FGR/TLR8/HAVCR2/CCL3/AIM2/FCN1/CSF1R/CD2/CLEC4E/CRTAM/CD14/CD244	14
BP	GO:0035590	purinergic nucleotide receptor signaling pathway	7/361	22/18493	1.35054e-07	1.88237e-06	1.43477e-06	P2RX7/P2RY12/P2RY8/P2RY13/P2RY10/GPR171/P2RX1	7
BP	GO:0050766	positive regulation of phagocytosis	10/361	57/18493	1.3556e-07	1.88237e-06	1.43477e-06	DOCK2/ITGAM/CD300LF/SIRPG/PTPRC/FCER1G/FCGR2B/NCKAP1L/STAP1/SIRPB1	10
BP	GO:0002715	regulation of natural killer cell mediated immunity	9/361	44/18493	1.44582e-07	1.99852e-06	1.5233e-06	LILRB1/NCR3/SLAMF6/CD96/SH2D1A/IL18RAP/HAVCR2/CRTAM/LAG3	9
BP	GO:0050708	regulation of protein secretion	27/361	438/18493	1.54693e-07	2.12861e-06	1.62246e-06	P2RX7/TLR10/CD200R1/LILRB1/BLK/CCL19/FGR/TNFRSF4/TLR8/FCGR2B/HAVCR2/CCL3/AIM2/SRGN/CCL5/IFNG/CD38/FCN1/CSF1R/CCR7/CD2/CLEC4E/CRTAM/CD14/CD40LG/CD244/CACNA2D2	27
BP	GO:0001914	regulation of T cell mediated cytotoxicity	8/361	33/18493	1.76913e-07	2.40096e-06	1.83005e-06	P2RX7/LILRB1/PTPRC/FCGR2B/CD1E/IL7R/CD1B/IL12RB1	8
BP	GO:0045066	regulatory T cell differentiation	8/361	33/18493	1.76913e-07	2.40096e-06	1.83005e-06	CD28/LILRB2/FUT7/PLA2G2D/IFNG/IL2RA/LILRB4/CTLA4	8
BP	GO:0002704	negative regulation of leukocyte mediated immunity	9/361	45/18493	1.77644e-07	2.40096e-06	1.83005e-06	LILRB1/CCR2/CD96/PTPRC/FCGR2B/HAVCR2/IL7R/CD84/TBX21	9
BP	GO:0032653	regulation of interleukin-10 production	9/361	45/18493	1.77644e-07	2.40096e-06	1.83005e-06	CD28/LILRB1/TIGIT/IRF4/FCER1G/FCGR2B/SASH3/PDCD1LG2/CD40LG	9
BP	GO:0032613	interleukin-10 production	9/361	47/18493	2.63926e-07	3.52017e-06	2.68312e-06	CD28/LILRB1/TIGIT/IRF4/FCER1G/FCGR2B/SASH3/PDCD1LG2/CD40LG	9
BP	GO:0043370	regulation of CD4-positive, alpha-beta T cell differentiation	9/361	47/18493	2.63926e-07	3.52017e-06	2.68312e-06	CCL19/CD80/IRF4/SASH3/NCKAP1L/IFNG/TBX21/IL12RB1/CD86	9
BP	GO:0150076	neuroinflammatory response	9/361	47/18493	2.63926e-07	3.52017e-06	2.68312e-06	CD200R1/ITGAM/MMP9/PTPRC/AIF1/TLR8/TLR7/STAP1/ITGB2	9
BP	GO:0002224	toll-like receptor signaling pathway	14/361	131/18493	2.8216e-07	3.74694e-06	2.85597e-06	TLR10/ITGAM/CD300LF/IRF4/FCRL3/TLR8/HAVCR2/TLR7/TNIP3/CD14/BTK/LY96/LILRA4/ITGB2	14
BP	GO:0002700	regulation of production of molecular mediator of immune response	14/361	133/18493	3.40571e-07	4.50294e-06	3.43221e-06	CD28/LILRB1/CD96/PTPRC/FCRL3/FCER1G/TNFRSF4/FCGR2B/MZB1/SASH3/TBX21/BTK/CD40LG/CD244	14
BP	GO:0002507	tolerance induction	7/361	25/18493	3.61919e-07	4.74394e-06	3.6159e-06	LILRB2/CD3E/HAVCR2/ICOS/PDCD1/CCR4/IL2RA	7
BP	GO:0050901	leukocyte tethering or rolling	7/361	25/18493	3.61919e-07	4.74394e-06	3.6159e-06	CCR2/SELP/CCL21/SPN/SELL/SELPLG/VCAM1	7
BP	GO:0070232	regulation of T cell apoptotic process	8/361	36/18493	3.66362e-07	4.78158e-06	3.64459e-06	GIMAP8/PTCRA/TNFRSF4/SLC46A2/PDCD1/IL7R/CD27/CCL5	8
BP	GO:0070838	divalent metal ion transport	27/361	459/18493	3.91962e-07	5.09383e-06	3.88259e-06	P2RX7/LILRB1/CXCL11/CCL19/CORO1A/LILRB2/FASLG/PTPRC/FCRL3/CCL21/CD4/IL16/TRPV2/CXCL9/LCK/CCR5/CCL3/CCL5/P2RY12/RAMP3/CD84/CCR7/CCL4/PRKCB/P2RX1/TRPM5/CACNA2D2	27
BP	GO:0042116	macrophage activation	11/361	80/18493	4.2358e-07	5.45808e-06	4.16023e-06	SUCNR1/ITGAM/PTPRC/AIF1/TLR8/FCGR2B/HAVCR2/TLR7/TYROBP/STAP1/ITGB2	11
BP	GO:0050764	regulation of phagocytosis	11/361	80/18493	4.2358e-07	5.45808e-06	4.16023e-06	DOCK2/ITGAM/CD300LF/FGR/SIRPG/PTPRC/FCER1G/FCGR2B/NCKAP1L/STAP1/SIRPB1	11
BP	GO:0072511	divalent inorganic cation transport	27/361	462/18493	4.45389e-07	5.71023e-06	4.35242e-06	P2RX7/LILRB1/CXCL11/CCL19/CORO1A/LILRB2/FASLG/PTPRC/FCRL3/CCL21/CD4/IL16/TRPV2/CXCL9/LCK/CCR5/CCL3/CCL5/P2RY12/RAMP3/CD84/CCR7/CCL4/PRKCB/P2RX1/TRPM5/CACNA2D2	27
BP	GO:0070372	regulation of ERK1 and ERK2 cascade	22/361	324/18493	4.46904e-07	5.71023e-06	4.35242e-06	CCL17/XCL2/CCL19/PTPRC/CCL18/GPR183/CCL21/CD4/HAVCR2/CCL23/CCL3/CCL5/RAMP3/CCL3L1/MARCO/CSF1R/CCR7/SLAMF1/CCL4/CCL14/SCIMP/EPHA8	22
BP	GO:0002221	pattern recognition receptor signaling pathway	16/361	179/18493	4.74494e-07	6.03739e-06	4.60178e-06	TLR10/ITGAM/CD300LF/IRF4/FCRL3/TLR8/HAVCR2/TLR7/TNIP3/MARCO/FCN1/CD14/BTK/LY96/LILRA4/ITGB2	16
BP	GO:0002360	T cell lineage commitment	7/361	26/18493	4.86993e-07	6.145e-06	4.68381e-06	SLAMF6/IRF4/SPN/BATF/TBX21/IL12RB1/LY9	7
BP	GO:1901623	regulation of lymphocyte chemotaxis	7/361	26/18493	4.86993e-07	6.145e-06	4.68381e-06	XCL2/CCR2/CCL21/CCL3/CCL5/CXCL13/CCL4	7
BP	GO:0033627	cell adhesion mediated by integrin	10/361	65/18493	4.8925e-07	6.14797e-06	4.68607e-06	VTN/CD3E/CCL21/NCKAP1L/CCL5/P2RY12/CXCL13/FERMT3/ITGB2/EPHA8	10
BP	GO:0002791	regulation of peptide secretion	27/361	465/18493	5.05487e-07	6.32587e-06	4.82167e-06	P2RX7/TLR10/CD200R1/LILRB1/BLK/CCL19/FGR/TNFRSF4/TLR8/FCGR2B/HAVCR2/CCL3/AIM2/SRGN/CCL5/IFNG/CD38/FCN1/CSF1R/CCR7/CD2/CLEC4E/CRTAM/CD14/CD40LG/CD244/CACNA2D2	27
BP	GO:0002377	immunoglobulin production	16/361	180/18493	5.11667e-07	6.37697e-06	4.86062e-06	CD28/VPREB3/TMIGD2/PTPRC/FCRL3/TNFRSF4/FCGR2B/BATF/MZB1/GAPT/IL7R/SASH3/TBX21/BTK/CD40LG/TNFSF13B	16
BP	GO:0002577	regulation of antigen processing and presentation	6/361	17/18493	5.47811e-07	6.79956e-06	5.18273e-06	CCL19/LILRB2/CCL21/FCGR2B/WAS/CCR7	6
BP	GO:0002863	positive regulation of inflammatory response to antigenic stimulus	5/361	10/18493	6.41146e-07	7.92571e-06	6.04109e-06	CD28/FCER1G/CCR7/LTA/BTK	5
BP	GO:0045807	positive regulation of endocytosis	14/361	141/18493	6.98694e-07	8.60213e-06	6.55667e-06	DOCK2/ITGAM/CCL19/CD300LF/VTN/SIRPG/PTPRC/FCER1G/CCL21/FCGR2B/NCKAP1L/CD14/STAP1/SIRPB1	14
BP	GO:0043029	T cell homeostasis	8/361	39/18493	7.07765e-07	8.67869e-06	6.61502e-06	P2RX7/CORO1A/TNFRSF4/SLC46A2/SIT1/GPR174/NCKAP1L/IL2RA	8
BP	GO:0033077	T cell differentiation in thymus	10/361	69/18493	8.67159e-07	1.05377e-05	8.03203e-06	CD28/TESPA1/DOCK2/CD3E/PTPRC/IL7R/CD3G/ZAP70/CCR7/CD3D	10
BP	GO:0030890	positive regulation of B cell proliferation	8/361	40/18493	8.69771e-07	1.05377e-05	8.03203e-06	PTPRC/FCRL3/TNFRSF4/GPR183/SASH3/NCKAP1L/CD38/TNFSF13B	8
BP	GO:0097028	dendritic cell differentiation	8/361	40/18493	8.69771e-07	1.05377e-05	8.03203e-06	LILRB1/SPI1/CCL19/LILRB2/IRF4/FCGR2B/BATF/CCR7	8
BP	GO:0050871	positive regulation of B cell activation	14/361	144/18493	9.02852e-07	1.08951e-05	8.30443e-06	CD28/PTPRC/FCRL3/TNFRSF4/GPR183/IGLL1/SASH3/NCKAP1L/CD27/IGLL5/CD38/TBX21/BTK/TNFSF13B	14
BP	GO:0045123	cellular extravasation	9/361	54/18493	9.13237e-07	1.09769e-05	8.36675e-06	CCR2/JAML/SELP/CCL21/SPN/SELL/SELPLG/VCAM1/ITGB2	9
BP	GO:0043087	regulation of GTPase activity	27/361	481/18493	9.73435e-07	1.16544e-05	8.88315e-06	TAGAP/CCL17/XCL2/DOCK2/RASGRP2/CCL19/RGS18/ACAP1/CCL18/RASAL3/CCL21/CCL23/ARHGAP15/RHOH/CCL3/NCKAP1L/CCL5/CCL3L1/CXCL13/GPR65/CCR7/CCL4/CCL14/ARHGAP9/RGS1/AGAP2/ARHGAP36	27
BP	GO:0070371	ERK1 and ERK2 cascade	22/361	341/18493	1.05651e-06	1.25994e-05	9.60345e-06	CCL17/XCL2/CCL19/PTPRC/CCL18/GPR183/CCL21/CD4/HAVCR2/CCL23/CCL3/CCL5/RAMP3/CCL3L1/MARCO/CSF1R/CCR7/SLAMF1/CCL4/CCL14/SCIMP/EPHA8	22
BP	GO:0050869	negative regulation of B cell activation	7/361	29/18493	1.09864e-06	1.30507e-05	9.94742e-06	TNFRSF13B/SAMSN1/FCGR2B/SLA2/MNDA/BTK/CTLA4	7
BP	GO:0046641	positive regulation of alpha-beta T cell proliferation	6/361	19/18493	1.1619e-06	1.37484e-05	1.04792e-05	CD28/CCR2/CD3E/PTPRC/RASAL3/ZAP70	6
BP	GO:0042130	negative regulation of T cell proliferation	9/361	56/18493	1.25707e-06	1.48168e-05	1.12936e-05	LILRB1/CD80/LILRB2/SPN/HAVCR2/PLA2G2D/IL2RA/PDCD1LG2/CD86	9
BP	GO:0002437	inflammatory response to antigenic stimulus	8/361	42/18493	1.29021e-06	1.50905e-05	1.15022e-05	CD28/CD6/FCER1G/FCGR2B/IL2RA/CCR7/LTA/BTK	8
BP	GO:0042269	regulation of natural killer cell mediated cytotoxicity	8/361	42/18493	1.29021e-06	1.50905e-05	1.15022e-05	LILRB1/NCR3/SLAMF6/SH2D1A/IL18RAP/HAVCR2/CRTAM/LAG3	8
BP	GO:0060402	calcium ion transport into cytosol	14/361	149/18493	1.36391e-06	1.58914e-05	1.21126e-05	P2RX7/CXCL11/CCL19/CORO1A/FASLG/PTPRC/CCL21/CD4/CXCL9/LCK/CCR5/CCL3/RAMP3/CCR7	14
BP	GO:0001773	myeloid dendritic cell activation	7/361	30/18493	1.40912e-06	1.62316e-05	1.2372e-05	DOCK2/SPI1/IRF4/HAVCR2/BATF/SLAMF1/CD2	7
BP	GO:0043372	positive regulation of CD4-positive, alpha-beta T cell differentiation	7/361	30/18493	1.40912e-06	1.62316e-05	1.2372e-05	CCL19/CD80/SASH3/NCKAP1L/IFNG/IL12RB1/CD86	7
BP	GO:2000406	positive regulation of T cell migration	7/361	30/18493	1.40912e-06	1.62316e-05	1.2372e-05	XCL2/CCR2/AIF1/CCL21/SPN/CCL5/CXCL13	7
BP	GO:2000514	regulation of CD4-positive, alpha-beta T cell activation	9/361	57/18493	1.46735e-06	1.68385e-05	1.28346e-05	CCL19/CD80/IRF4/SASH3/NCKAP1L/IFNG/TBX21/IL12RB1/CD86	9
BP	GO:0030099	myeloid cell differentiation	24/361	405/18493	1.5472e-06	1.76881e-05	1.34821e-05	LILRB1/SPI1/CCL19/MMP9/IRF4/IRF8/FCER1G/GPR183/CD4/IKZF1/BATF/CCL3/NCKAP1L/TYROBP/IFNG/CSF1R/CCR7/LILRB4/EVI2B/C1QC/PRKCB/GPR171/OSCAR/LILRB3	24
BP	GO:0033630	positive regulation of cell adhesion mediated by integrin	6/361	20/18493	1.63264e-06	1.8595e-05	1.41734e-05	CD3E/CCL21/NCKAP1L/CCL5/P2RY12/CXCL13	6
BP	GO:0043552	positive regulation of phosphatidylinositol 3-kinase activity	7/361	31/18493	1.78978e-06	2.03087e-05	1.54796e-05	CCL19/FGR/CCL21/P2RY12/CCR7/AGAP2/EPHA8	7
BP	GO:0033628	regulation of cell adhesion mediated by integrin	8/361	44/18493	1.87255e-06	2.11689e-05	1.61352e-05	CD3E/CCL21/NCKAP1L/CCL5/P2RY12/CXCL13/FERMT3/EPHA8	8
BP	GO:0097553	calcium ion transmembrane import into cytosol	13/361	132/18493	1.91619e-06	2.1582e-05	1.64501e-05	P2RX7/CXCL11/CCL19/CORO1A/FASLG/PTPRC/CCL21/CXCL9/LCK/CCR5/CCL3/RAMP3/CCR7	13
BP	GO:0006911	phagocytosis, engulfment	12/361	112/18493	1.95498e-06	2.19376e-05	1.67211e-05	ITGAM/FCER1G/MSR1/AIF1/FCGR2B/IGLL1/NCKAP1L/BIN2/IGLL5/FCGR1A/STAP1/ITGB2	12
BP	GO:0002861	regulation of inflammatory response to antigenic stimulus	6/361	21/18493	2.24824e-06	2.48211e-05	1.8919e-05	CD28/FCER1G/FCGR2B/CCR7/LTA/BTK	6
BP	GO:0033622	integrin activation	6/361	21/18493	2.24824e-06	2.48211e-05	1.8919e-05	PLEK/SELP/MZB1/P2RY12/CXCL13/FERMT3	6
BP	GO:0070233	negative regulation of T cell apoptotic process	6/361	21/18493	2.24824e-06	2.48211e-05	1.8919e-05	PTCRA/TNFRSF4/SLC46A2/IL7R/CD27/CCL5	6
BP	GO:0035587	purinergic receptor signaling pathway	7/361	32/18493	2.25275e-06	2.48211e-05	1.8919e-05	P2RX7/P2RY12/P2RY8/P2RY13/P2RY10/GPR171/P2RX1	7
BP	GO:0046633	alpha-beta T cell proliferation	7/361	32/18493	2.25275e-06	2.48211e-05	1.8919e-05	CD28/CCR2/DOCK2/CD3E/PTPRC/RASAL3/ZAP70	7
BP	GO:1903727	positive regulation of phospholipid metabolic process	8/361	46/18493	2.66469e-06	2.92538e-05	2.22977e-05	CCL19/FGR/CCL21/APOC2/P2RY12/CCR7/AGAP2/EPHA8	8
BP	GO:0001774	microglial cell activation	7/361	33/18493	2.81163e-06	3.06458e-05	2.33587e-05	ITGAM/PTPRC/AIF1/TLR8/TLR7/STAP1/ITGB2	7
BP	GO:0002269	leukocyte activation involved in inflammatory response	7/361	33/18493	2.81163e-06	3.06458e-05	2.33587e-05	ITGAM/PTPRC/AIF1/TLR8/TLR7/STAP1/ITGB2	7
BP	GO:0051209	release of sequestered calcium ion into cytosol	12/361	116/18493	2.83895e-06	3.0833e-05	2.35013e-05	P2RX7/CXCL11/CCL19/CORO1A/FASLG/PTPRC/CCL21/CXCL9/LCK/CCR5/CCL3/CCR7	12
BP	GO:0046638	positive regulation of alpha-beta T cell differentiation	8/361	47/18493	3.15715e-06	3.41669e-05	2.60425e-05	CCL19/CD80/SASH3/NCKAP1L/IFNG/ZAP70/IL12RB1/CD86	8
BP	GO:0051283	negative regulation of sequestering of calcium ion	12/361	118/18493	3.4007e-06	3.66721e-05	2.7952e-05	P2RX7/CXCL11/CCL19/CORO1A/FASLG/PTPRC/CCL21/CXCL9/LCK/CCR5/CCL3/CCR7	12
BP	GO:0060401	cytosolic calcium ion transport	14/361	161/18493	3.42886e-06	3.68452e-05	2.80839e-05	P2RX7/CXCL11/CCL19/CORO1A/FASLG/PTPRC/CCL21/CD4/CXCL9/LCK/CCR5/CCL3/RAMP3/CCR7	14
BP	GO:2000516	positive regulation of CD4-positive, alpha-beta T cell activation	7/361	34/18493	3.48161e-06	3.71589e-05	2.8323e-05	CCL19/CD80/SASH3/NCKAP1L/IFNG/IL12RB1/CD86	7
BP	GO:0002637	regulation of immunoglobulin production	9/361	63/18493	3.4825e-06	3.71589e-05	2.8323e-05	CD28/PTPRC/FCRL3/TNFRSF4/FCGR2B/MZB1/SASH3/TBX21/CD40LG	9
BP	GO:0030100	regulation of endocytosis	18/361	260/18493	3.83439e-06	4.07706e-05	3.10759e-05	LILRB1/DOCK2/ITGAM/CCL19/CD300LF/VTN/FGR/SIRPG/PTPRC/FCER1G/CCL21/FCGR2B/APOC2/NCKAP1L/APOC1/CD14/STAP1/SIRPB1	18
BP	GO:0051282	regulation of sequestering of calcium ion	12/361	120/18493	4.05816e-06	4.29996e-05	3.27749e-05	P2RX7/CXCL11/CCL19/CORO1A/FASLG/PTPRC/CCL21/CXCL9/LCK/CCR5/CCL3/CCR7	12
BP	GO:0002707	negative regulation of lymphocyte mediated immunity	7/361	35/18493	4.27955e-06	4.50315e-05	3.43237e-05	LILRB1/CD96/PTPRC/FCGR2B/HAVCR2/IL7R/TBX21	7
BP	GO:0090218	positive regulation of lipid kinase activity	7/361	35/18493	4.27955e-06	4.50315e-05	3.43237e-05	CCL19/FGR/CCL21/P2RY12/CCR7/AGAP2/EPHA8	7
BP	GO:0099024	plasma membrane invagination	12/361	121/18493	4.427e-06	4.64225e-05	3.53839e-05	ITGAM/FCER1G/MSR1/AIF1/FCGR2B/IGLL1/NCKAP1L/BIN2/IGLL5/FCGR1A/STAP1/ITGB2	12
BP	GO:1903532	positive regulation of secretion by cell	22/361	373/18493	4.57583e-06	4.78182e-05	3.64477e-05	P2RX7/BLK/ITGAM/RETN/CCL19/FGR/FCER1G/TNFRSF4/TLR8/HAVCR2/CCL3/AIM2/IFNG/CD38/FCN1/CSF1R/CD2/CLEC4E/CRTAM/CD14/CD244/ITGB2	22
BP	GO:0035589	G protein-coupled purinergic nucleotide receptor signaling pathway	5/361	14/18493	4.77526e-06	4.97314e-05	3.7906e-05	P2RY12/P2RY8/P2RY13/P2RY10/GPR171	5
BP	GO:0051924	regulation of calcium ion transport	17/361	239/18493	4.96866e-06	5.15689e-05	3.93066e-05	P2RX7/LILRB1/CXCL11/CORO1A/LILRB2/FCRL3/CD4/IL16/TRPV2/CXCL9/CCL3/CCL5/P2RY12/RAMP3/CD84/CCL4/P2RX1	17
BP	GO:0042742	defense response to bacterium	20/361	319/18493	5.04683e-06	5.2202e-05	3.97892e-05	P2RX7/GNLY/FGR/IRF8/FCER1G/SELP/CD4/SPN/HAVCR2/IGLL1/STAB1/JCHAIN/IGLL5/CXCL13/CLEC4E/LTA/MPEG1/LYZ/HAMP/SIGLEC11	20
BP	GO:0002755	MyD88-dependent toll-like receptor signaling pathway	7/361	36/18493	5.22411e-06	5.38526e-05	4.10472e-05	TLR10/CD300LF/TLR8/TLR7/CD14/BTK/LY96	7
BP	GO:0051208	sequestering of calcium ion	12/361	123/18493	5.25417e-06	5.39795e-05	4.1144e-05	P2RX7/CXCL11/CCL19/CORO1A/FASLG/PTPRC/CCL21/CXCL9/LCK/CCR5/CCL3/CCR7	12
BP	GO:0002886	regulation of myeloid leukocyte mediated immunity	8/361	51/18493	5.97296e-06	6.11574e-05	4.66151e-05	CCR2/ITGAM/FGR/FCER1G/FCGR2B/CD84/BTK/ITGB2	8
BP	GO:0030101	natural killer cell activation	10/361	85/18493	6.05194e-06	6.17582e-05	4.7073e-05	NCR3/CORO1A/PTPRC/HAVCR2/IL21R/ZNF683/SLAMF7/CD2/CD244/ITGB2	10
BP	GO:0061756	leukocyte adhesion to vascular endothelial cell	7/361	37/18493	6.33584e-06	6.44391e-05	4.91164e-05	CCR2/SELP/CCL21/SPN/SELL/SELPLG/VCAM1	7
BP	GO:1903725	regulation of phospholipid metabolic process	10/361	86/18493	6.73101e-06	6.81911e-05	5.19762e-05	CCL19/FGR/CCL21/APOC2/P2RY12/APOC1/CCR7/SLA2/AGAP2/EPHA8	10
BP	GO:0002920	regulation of humoral immune response	12/361	126/18493	6.74959e-06	6.81911e-05	5.19762e-05	VTN/PTPRC/FCGR2B/CXCL13/C1S/CCR7/LTA/FCER2/C1QA/C1QC/C3AR1/C1QB	12
BP	GO:0150077	regulation of neuroinflammatory response	6/361	25/18493	6.8686e-06	6.91636e-05	5.27175e-05	CD200R1/ITGAM/MMP9/PTPRC/STAP1/ITGB2	6
BP	GO:0002712	regulation of B cell mediated immunity	8/361	52/18493	6.94006e-06	6.94234e-05	5.29155e-05	CD28/PTPRC/FCER1G/FCGR2B/TBX21/LTA/FCER2/BTK	8
BP	GO:0002889	regulation of immunoglobulin mediated immune response	8/361	52/18493	6.94006e-06	6.94234e-05	5.29155e-05	CD28/PTPRC/FCER1G/FCGR2B/TBX21/LTA/FCER2/BTK	8
BP	GO:0001911	negative regulation of leukocyte mediated cytotoxicity	5/361	15/18493	7.04839e-06	6.95914e-05	5.30436e-05	LILRB1/PTPRC/FCGR2B/HAVCR2/IL7R	5
BP	GO:0010820	positive regulation of T cell chemotaxis	5/361	15/18493	7.04839e-06	6.95914e-05	5.30436e-05	XCL2/CCR2/CCL21/CCL5/CXCL13	5
BP	GO:0030889	negative regulation of B cell proliferation	5/361	15/18493	7.04839e-06	6.95914e-05	5.30436e-05	TNFRSF13B/FCGR2B/MNDA/BTK/CTLA4	5
BP	GO:0032695	negative regulation of interleukin-12 production	5/361	15/18493	7.04839e-06	6.95914e-05	5.30436e-05	LILRB1/TIGIT/TLR8/SLAMF1/CMKLR1	5
BP	GO:0050714	positive regulation of protein secretion	17/361	246/18493	7.29514e-06	7.17945e-05	5.47228e-05	P2RX7/BLK/CCL19/FGR/TNFRSF4/TLR8/HAVCR2/CCL3/AIM2/CD38/FCN1/CSF1R/CD2/CLEC4E/CRTAM/CD14/CD244	17
BP	GO:0002714	positive regulation of B cell mediated immunity	7/361	38/18493	7.6373e-06	7.46786e-05	5.69211e-05	CD28/PTPRC/FCER1G/TBX21/LTA/FCER2/BTK	7
BP	GO:0002891	positive regulation of immunoglobulin mediated immune response	7/361	38/18493	7.6373e-06	7.46786e-05	5.69211e-05	CD28/PTPRC/FCER1G/TBX21/LTA/FCER2/BTK	7
BP	GO:0010324	membrane invagination	12/361	129/18493	8.60633e-06	8.38841e-05	6.39377e-05	ITGAM/FCER1G/MSR1/AIF1/FCGR2B/IGLL1/NCKAP1L/BIN2/IGLL5/FCGR1A/STAP1/ITGB2	12
BP	GO:0072539	T-helper 17 cell differentiation	6/361	26/18493	8.78308e-06	8.53334e-05	6.50423e-05	SLAMF6/IRF4/BATF/TBX21/IL12RB1/LY9	6
BP	GO:0043551	regulation of phosphatidylinositol 3-kinase activity	8/361	54/18493	9.27498e-06	8.98256e-05	6.84664e-05	CCL19/FGR/CCL21/P2RY12/CCR7/SLA2/AGAP2/EPHA8	8
BP	GO:0002922	positive regulation of humoral immune response	5/361	16/18493	1.00884e-05	9.70848e-05	7.39995e-05	PTPRC/FCGR2B/CCR7/LTA/FCER2	5
BP	GO:0010819	regulation of T cell chemotaxis	5/361	16/18493	1.00884e-05	9.70848e-05	7.39995e-05	XCL2/CCR2/CCL21/CCL5/CXCL13	5
BP	GO:0009988	cell-cell recognition	9/361	72/18493	1.0733e-05	0.000102962	7.84794e-05	DOCK2/CCL19/CD6/CCL21/HAVCR2/CD209/CCR7/PRF1/FOLR2	9
BP	GO:0002820	negative regulation of adaptive immune response	7/361	40/18493	1.09102e-05	0.000104006	7.9275e-05	LILRB1/SAMSN1/PTPRC/FCGR2B/HAVCR2/IL7R/TBX21	7
BP	GO:0061900	glial cell activation	7/361	40/18493	1.09102e-05	0.000104006	7.9275e-05	ITGAM/PTPRC/AIF1/TLR8/TLR7/STAP1/ITGB2	7
BP	GO:0002698	negative regulation of immune effector process	11/361	111/18493	1.11621e-05	0.000106075	8.08521e-05	LILRB1/CCR2/CD96/PTPRC/FCRL3/FCGR2B/HAVCR2/IL7R/IL2RA/CD84/TBX21	11
BP	GO:0072538	T-helper 17 type immune response	6/361	28/18493	1.39061e-05	0.000131739	0.000100414	SLAMF6/IRF4/BATF/TBX21/IL12RB1/LY9	6
BP	GO:0002643	regulation of tolerance induction	5/361	17/18493	1.40636e-05	0.000132128	0.00010071	LILRB2/CD3E/HAVCR2/PDCD1/IL2RA	5
BP	GO:0002710	negative regulation of T cell mediated immunity	5/361	17/18493	1.40636e-05	0.000132128	0.00010071	LILRB1/PTPRC/FCGR2B/IL7R/TBX21	5
BP	GO:0043900	regulation of multi-organism process	21/361	371/18493	1.40775e-05	0.000132128	0.00010071	CD28/P2RX7/LILRB1/IRF8/CD4/LY86/HAVCR2/CCL3/AIM2/CCL5/IFNG/IL2RA/FCN1/CCL4/LTA/IL12RB1/PRF1/FCER2/LY96/SIGLEC11/BTBD17	21
BP	GO:0042088	T-helper 1 type immune response	7/361	42/18493	1.52672e-05	0.00014198	0.00010822	CCR2/CCL19/CD80/IL18RAP/SPN/HAVCR2/IL12RB1	7
BP	GO:0043300	regulation of leukocyte degranulation	7/361	42/18493	1.52672e-05	0.00014198	0.00010822	CCR2/ITGAM/FGR/FCER1G/FCGR2B/CD84/ITGB2	7
BP	GO:0071622	regulation of granulocyte chemotaxis	7/361	42/18493	1.52672e-05	0.00014198	0.00010822	CCL19/CCL21/NCKAP1L/CCL5/CCR7/CMKLR1/C3AR1	7
BP	GO:0051047	positive regulation of secretion	22/361	404/18493	1.60611e-05	0.000148908	0.0001135	P2RX7/BLK/ITGAM/RETN/CCL19/FGR/FCER1G/TNFRSF4/TLR8/HAVCR2/CCL3/AIM2/IFNG/CD38/FCN1/CSF1R/CD2/CLEC4E/CRTAM/CD14/CD244/ITGB2	22
BP	GO:0030316	osteoclast differentiation	10/361	95/18493	1.64459e-05	0.000152012	0.000115866	LILRB1/FCER1G/GPR183/CCL3/TYROBP/IFNG/CSF1R/LILRB4/OSCAR/LILRB3	10
BP	GO:0060627	regulation of vesicle-mediated transport	25/361	498/18493	1.70941e-05	0.000157302	0.000119898	LILRB1/CCR2/DOCK2/ITGAM/CCL19/CD300LF/VTN/CORO1A/FGR/SIRPG/PTPRC/FCER1G/CCL21/FCGR2B/APOC2/NCKAP1L/IFNG/CD84/APOC1/CD14/STAP1/PRKCB/SIRPB1/P2RX1/ITGB2	25
BP	GO:0038094	Fc-gamma receptor signaling pathway	12/361	138/18493	1.71217e-05	0.000157302	0.000119898	FGR/PTPRC/FCER1G/CD247/FCGR2B/FCGR3A/CD3G/WAS/NCKAP1L/CLEC4E/FCGR1A/FCGR2A	12
BP	GO:0045954	positive regulation of natural killer cell mediated cytotoxicity	6/361	29/18493	1.72471e-05	0.000157503	0.000120051	NCR3/SLAMF6/SH2D1A/IL18RAP/CRTAM/LAG3	6
BP	GO:0046640	regulation of alpha-beta T cell proliferation	6/361	29/18493	1.72471e-05	0.000157503	0.000120051	CD28/CCR2/CD3E/PTPRC/RASAL3/ZAP70	6
BP	GO:0002526	acute inflammatory response	15/361	211/18493	1.8001e-05	0.000163895	0.000124923	VTN/CD163/CD6/FCER1G/HPR/FCGR2B/C1S/CCR7/C1QA/BTK/C1QC/HAMP/C3AR1/VCAM1/C1QB	15
BP	GO:0031342	negative regulation of cell killing	5/361	18/18493	1.91619e-05	0.000173944	0.000132583	LILRB1/PTPRC/FCGR2B/HAVCR2/IL7R	5
BP	GO:0002793	positive regulation of peptide secretion	17/361	265/18493	1.92578e-05	0.000174295	0.00013285	P2RX7/BLK/CCL19/FGR/TNFRSF4/TLR8/HAVCR2/CCL3/AIM2/CD38/FCN1/CSF1R/CD2/CLEC4E/CRTAM/CD14/CD244	17
BP	GO:0007200	phospholipase C-activating G protein-coupled receptor signaling pathway	10/361	97/18493	1.97745e-05	0.00017844	0.00013601	GPR174/FPR3/P2RY12/GPR65/P2RY8/FPR1/CMKLR1/P2RY10/C3AR1/GNG13	10
BP	GO:0008037	cell recognition	15/361	213/18493	2.0119e-05	0.000181012	0.00013797	CD5/DOCK2/NCR3/CCL19/CD6/CCL21/HAVCR2/IGLL1/CD209/IGLL5/FCN1/CCR7/CRTAM/PRF1/FOLR2	15
BP	GO:0007157	heterophilic cell-cell adhesion via plasma membrane cell adhesion molecules	7/361	44/18493	2.09712e-05	0.000188123	0.00014339	JAML/CD6/SELP/CD209/ITGAL/VCAM1/LGALS7B	7
BP	GO:0032733	positive regulation of interleukin-10 production	6/361	30/18493	2.12066e-05	0.000189675	0.000144573	CD28/TIGIT/IRF4/FCER1G/SASH3/CD40LG	6
BP	GO:0007229	integrin-mediated signaling pathway	10/361	99/18493	2.36659e-05	0.00021105	0.000160865	ITGAM/FGR/PLEK/FCER1G/ITGAD/TYROBP/ITGAL/FYB1/FERMT3/ITGB2	10
BP	GO:0002717	positive regulation of natural killer cell mediated immunity	6/361	31/18493	2.58667e-05	0.000229331	0.0001748	NCR3/SLAMF6/SH2D1A/IL18RAP/CRTAM/LAG3	6
BP	GO:0045589	regulation of regulatory T cell differentiation	6/361	31/18493	2.58667e-05	0.000229331	0.0001748	CD28/LILRB2/IFNG/IL2RA/LILRB4/CTLA4	6
BP	GO:0018108	peptidyl-tyrosine phosphorylation	21/361	387/18493	2.63601e-05	0.000233026	0.000177616	BLK/SAMSN1/CD80/VTN/FGR/CD3E/PTPRC/CD4/LCK/CCL5/IFNG/ZAP70/CSF1R/ITK/SLA/BTK/NCF1/STAP1/CSF2RB/ITGB2/EPHA8	21
BP	GO:0051897	positive regulation of protein kinase B signaling	13/361	168/18493	2.68326e-05	0.000236516	0.000180276	CD28/TRAT1/CCL19/CD80/CCL21/ICOS/LCK/CCL3/P2RY12/RAMP3/CCR7/CD86/MYOC	13
BP	GO:0001768	establishment of T cell polarity	4/361	10/18493	2.73284e-05	0.000238126	0.000181503	DOCK2/CCL19/CCL21/CCR7	4
BP	GO:0002468	dendritic cell antigen processing and presentation	4/361	10/18493	2.73284e-05	0.000238126	0.000181503	CCL19/CCL21/FCGR2B/CCR7	4
BP	GO:0097048	dendritic cell apoptotic process	4/361	10/18493	2.73284e-05	0.000238126	0.000181503	LILRB1/CCL19/CCL21/CCR7	4
BP	GO:2000668	regulation of dendritic cell apoptotic process	4/361	10/18493	2.73284e-05	0.000238126	0.000181503	LILRB1/CCL19/CCL21/CCR7	4
BP	GO:1905517	macrophage migration	7/361	46/18493	2.83271e-05	0.000246122	0.000187598	CD200R1/CCL3/CCL5/P2RY12/CMKLR1/C3AR1/STAP1	7
BP	GO:0018212	peptidyl-tyrosine modification	21/361	390/18493	2.95227e-05	0.000255309	0.0001946	BLK/SAMSN1/CD80/VTN/FGR/CD3E/PTPRC/CD4/LCK/CCL5/IFNG/ZAP70/CSF1R/ITK/SLA/BTK/NCF1/STAP1/CSF2RB/ITGB2/EPHA8	21
BP	GO:0002532	production of molecular mediator involved in inflammatory response	8/361	63/18493	2.96363e-05	0.000255309	0.0001946	CD96/CD6/FCER1G/GBP5/BTK/APOD/ABCD2/P2RX1	8
BP	GO:0043550	regulation of lipid kinase activity	8/361	63/18493	2.96363e-05	0.000255309	0.0001946	CCL19/FGR/CCL21/P2RY12/CCR7/SLA2/AGAP2/EPHA8	8
BP	GO:0070229	negative regulation of lymphocyte apoptotic process	6/361	33/18493	3.76504e-05	0.000321904	0.00024536	PTCRA/TNFRSF4/SLC46A2/IL7R/CD27/CCL5	6
BP	GO:1905521	regulation of macrophage migration	6/361	33/18493	3.76504e-05	0.000321904	0.00024536	CD200R1/CCL5/P2RY12/CMKLR1/C3AR1/STAP1	6
BP	GO:0050702	interleukin-1 beta secretion	7/361	48/18493	3.76842e-05	0.000321904	0.00024536	P2RX7/CCL19/TLR8/CCL3/AIM2/GBP5/CCR7	7
BP	GO:0001767	establishment of lymphocyte polarity	4/361	11/18493	4.22838e-05	0.000358175	0.000273007	DOCK2/CCL19/CCL21/CCR7	4
BP	GO:0002923	regulation of humoral immune response mediated by circulating immunoglobulin	4/361	11/18493	4.22838e-05	0.000358175	0.000273007	PTPRC/FCGR2B/LTA/FCER2	4
BP	GO:0033632	regulation of cell-cell adhesion mediated by integrin	4/361	11/18493	4.22838e-05	0.000358175	0.000273007	CD3E/CCL5/CXCL13/FERMT3	4
BP	GO:0002438	acute inflammatory response to antigenic stimulus	5/361	21/18493	4.33664e-05	0.000365311	0.000278445	CD6/FCER1G/FCGR2B/CCR7/BTK	5
BP	GO:0034162	toll-like receptor 9 signaling pathway	5/361	21/18493	4.33664e-05	0.000365311	0.000278445	FCRL3/TLR8/HAVCR2/TLR7/LILRA4	5
BP	GO:0070555	response to interleukin-1	12/361	152/18493	4.48202e-05	0.000376514	0.000286985	CCL17/XCL2/CCL19/CCL18/CCL21/CCL23/CCL3/CCL5/CCL3L1/CD38/CCL4/CCL14	12
BP	GO:0071347	cellular response to interleukin-1	11/361	130/18493	4.93132e-05	0.000413117	0.000314884	CCL17/XCL2/CCL19/CCL18/CCL21/CCL23/CCL3/CCL5/CCL3L1/CCL4/CCL14	11
BP	GO:0032612	interleukin-1 production	9/361	87/18493	5.00392e-05	0.000418048	0.000318642	P2RX7/SUCNR1/CCL19/TLR8/HAVCR2/CCL3/AIM2/GBP5/CCR7	9
BP	GO:0050777	negative regulation of immune response	11/361	131/18493	5.29096e-05	0.000440816	0.000335997	LILRB1/CCR2/SAMSN1/CD96/PTPRC/FCGR2B/HAVCR2/IL7R/IL2RA/CD84/TBX21	11
BP	GO:0045622	regulation of T-helper cell differentiation	6/361	35/18493	5.33914e-05	0.000443616	0.00033813	CCL19/CD80/IRF4/TBX21/IL12RB1/CD86	6
BP	GO:0002517	T cell tolerance induction	4/361	12/18493	6.24502e-05	0.000514664	0.000392284	LILRB2/CD3E/ICOS/IL2RA	4
BP	GO:0002864	regulation of acute inflammatory response to antigenic stimulus	4/361	12/18493	6.24502e-05	0.000514664	0.000392284	FCER1G/FCGR2B/CCR7/BTK	4
BP	GO:0033623	regulation of integrin activation	4/361	12/18493	6.24502e-05	0.000514664	0.000392284	PLEK/SELP/P2RY12/CXCL13	4
BP	GO:0090023	positive regulation of neutrophil chemotaxis	5/361	23/18493	6.94437e-05	0.000570752	0.000435035	CCL19/CCL21/NCKAP1L/CCR7/C3AR1	5
BP	GO:0031529	ruffle organization	7/361	53/18493	7.25646e-05	0.000594795	0.000453362	PLEK/AIF1/CCL21/P2RY12/CSF1R/CCR7/STAP1	7
BP	GO:0002823	negative regulation of adaptive immune response based on somatic recombination of immune receptors built from immunoglobulin superfamily domains	6/361	37/18493	7.3997e-05	0.000601671	0.000458602	LILRB1/PTPRC/FCGR2B/HAVCR2/IL7R/TBX21	6
BP	GO:0038083	peptidyl-tyrosine autophosphorylation	6/361	37/18493	7.3997e-05	0.000601671	0.000458602	BLK/FGR/LCK/ITK/SLA/BTK	6
BP	GO:0050856	regulation of T cell receptor signaling pathway	6/361	37/18493	7.3997e-05	0.000601671	0.000458602	TESPA1/TRAT1/UBASH3A/LCK/CCR7/LILRB4	6
BP	GO:0035821	modification of morphology or physiology of other organism	12/361	161/18493	7.84111e-05	0.000635862	0.000484663	P2RX7/GNLY/CD4/CD209/CCL3/CCL5/IFNG/CCL4/PRF1/FCER2/LYZ/HAMP	12
BP	GO:0002312	B cell activation involved in immune response	8/361	72/18493	7.86456e-05	0.000636067	0.00048482	CD28/PTPRC/GPR183/FCGR2B/BATF/GAPT/TBX21/CD40LG	8
BP	GO:0002381	immunoglobulin production involved in immunoglobulin mediated immune response	7/361	54/18493	8.19907e-05	0.000661363	0.0005041	CD28/PTPRC/BATF/GAPT/TBX21/BTK/CD40LG	7
BP	GO:0045834	positive regulation of lipid metabolic process	11/361	138/18493	8.49911e-05	0.000683751	0.000521165	CCL19/FGR/CCL21/APOC2/IFNG/P2RY12/APOC1/CCR7/AGAP2/ABCD2/EPHA8	11
BP	GO:0035588	G protein-coupled purinergic receptor signaling pathway	5/361	24/18493	8.63217e-05	0.000690801	0.000526539	P2RY12/P2RY8/P2RY13/P2RY10/GPR171	5
BP	GO:0050855	regulation of B cell receptor signaling pathway	5/361	24/18493	8.63217e-05	0.000690801	0.000526539	BLK/PTPRC/FCRL3/STAP1/PRKCB	5
BP	GO:0032611	interleukin-1 beta production	8/361	73/18493	8.68439e-05	0.000693156	0.000528333	P2RX7/SUCNR1/CCL19/TLR8/CCL3/AIM2/GBP5/CCR7	8
BP	GO:0002430	complement receptor mediated signaling pathway	4/361	13/18493	8.88193e-05	0.00070522	0.000537529	FPR3/FPR1/CMKLR1/C3AR1	4
BP	GO:0050862	positive regulation of T cell receptor signaling pathway	4/361	13/18493	8.88193e-05	0.00070522	0.000537529	TESPA1/TRAT1/LCK/CCR7	4
BP	GO:0002431	Fc receptor mediated stimulatory signaling pathway	11/361	140/18493	9.67597e-05	0.000766266	0.000584059	FGR/PTPRC/FCER1G/CD247/FCGR2B/FCGR3A/CD3G/WAS/NCKAP1L/FCGR1A/FCGR2A	11
BP	GO:0070588	calcium ion transmembrane transport	17/361	302/18493	9.87548e-05	0.000780035	0.000594554	P2RX7/CXCL11/CCL19/CORO1A/FASLG/PTPRC/CCL21/TRPV2/CXCL9/LCK/CCR5/CCL3/P2RY12/RAMP3/CCR7/TRPM5/CACNA2D2	17
BP	GO:0050701	interleukin-1 secretion	7/361	56/18493	0.000103842	0.00081809	0.00062356	P2RX7/CCL19/TLR8/CCL3/AIM2/GBP5/CCR7	7
BP	GO:0071624	positive regulation of granulocyte chemotaxis	5/361	25/18493	0.000106185	0.000834389	0.000635984	CCL19/CCL21/NCKAP1L/CCR7/C3AR1	5
BP	GO:0045576	mast cell activation	7/361	57/18493	0.00011642	0.000912455	0.000695486	CD300LF/FGR/FCER1G/RHOH/CD84/LCP2/BTK	7
BP	GO:0051709	regulation of killing of cells of other organism	4/361	14/18493	0.000122437	0.000954694	0.000727681	P2RX7/IFNG/PRF1/FCER2	4
BP	GO:1903975	regulation of glial cell migration	4/361	14/18493	0.000122437	0.000954694	0.000727681	CCR2/GPR183/P2RY12/STAP1	4
BP	GO:0001916	positive regulation of T cell mediated cytotoxicity	5/361	26/18493	0.000129376	0.00100365	0.000765	P2RX7/PTPRC/CD1E/CD1B/IL12RB1	5
BP	GO:1902624	positive regulation of neutrophil migration	5/361	26/18493	0.000129376	0.00100365	0.000765	CCL19/CCL21/NCKAP1L/CCR7/C3AR1	5
BP	GO:0046718	viral entry into host cell	10/361	121/18493	0.000131625	0.0010185	0.000776317	CD80/TNFRSF4/CD4/CD209/CCR5/MRC1/FCN1/SLAMF1/SELPLG/CD86	10
BP	GO:0051222	positive regulation of protein transport	20/361	402/18493	0.000134515	0.00103823	0.000791351	P2RX7/BLK/ITGAM/CCL19/FGR/TNFRSF4/TLR8/HAVCR2/CCL3/AIM2/IFNG/CD38/FCN1/CSF1R/CD2/CLEC4E/CRTAM/CD14/CD244/ITGB2	20
BP	GO:0043491	protein kinase B signaling	15/361	253/18493	0.000142886	0.00110004	0.00083847	CD28/TRAT1/CCL19/CD80/CCL21/ICOS/LCK/CCL3/CCL5/P2RY12/RAMP3/CCR7/CD86/MYOC/PAX2	15
BP	GO:0034113	heterotypic cell-cell adhesion	7/361	59/18493	0.000145291	0.00111573	0.000850428	CD200R1/LILRB2/PTPRC/ITGAD/LCK/CD2/ITGB2	7
BP	GO:0050848	regulation of calcium-mediated signaling	9/361	100/18493	0.000148649	0.00113609	0.000865947	TRAT1/PLEK/CD3E/CD4/CCL3/ZAP70/SLA2/CCL4/CMKLR1	9
BP	GO:1904951	positive regulation of establishment of protein localization	21/361	437/18493	0.00014869	0.00113609	0.000865947	P2RX7/BLK/ITGAM/CCL19/FGR/TNFRSF4/TLR8/HAVCR2/CCL3/AIM2/GZMB/IFNG/CD38/FCN1/CSF1R/CD2/CLEC4E/CRTAM/CD14/CD244/ITGB2	21
BP	GO:0050706	regulation of interleukin-1 beta secretion	6/361	42/18493	0.000153811	0.00117228	0.000893529	P2RX7/CCL19/TLR8/CCL3/AIM2/CCR7	6
BP	GO:0002825	regulation of T-helper 1 type immune response	5/361	27/18493	0.000156255	0.00118497	0.000903199	CCR2/CCL19/CD80/HAVCR2/IL12RB1	5
BP	GO:0045577	regulation of B cell differentiation	5/361	27/18493	0.000156255	0.00118497	0.000903199	PTPRC/FCRL3/NCKAP1L/CD27/BTK	5
BP	GO:0033631	cell-cell adhesion mediated by integrin	4/361	15/18493	0.000164396	0.00123745	0.000943201	CD3E/CCL5/CXCL13/FERMT3	4
BP	GO:0046629	gamma-delta T cell activation	4/361	15/18493	0.000164396	0.00123745	0.000943201	LILRB1/JAML/PTPRC/NCKAP1L	4
BP	GO:2000484	positive regulation of interleukin-8 secretion	4/361	15/18493	0.000164396	0.00123745	0.000943201	FCN1/CD2/CD14/CD244	4
BP	GO:0030183	B cell differentiation	10/361	125/18493	0.000172266	0.00129348	0.000985913	PTPRC/FCRL3/GPR183/FCGR2B/CD79A/NCKAP1L/CD27/BTK/CD40LG/VCAM1	10
BP	GO:0007249	I-kappaB kinase/NF-kappaB signaling	15/361	258/18493	0.000177024	0.00132594	0.00101065	APOL3/CCL19/FASLG/TLR8/CCL21/CD4/TLR7/RHOH/TNIP3/TIFAB/CCR7/CD14/BTK/LY96/PRKCB	15
BP	GO:0031640	killing of cells of other organism	7/361	61/18493	0.000179707	0.00133943	0.00102093	P2RX7/GNLY/IFNG/PRF1/FCER2/LYZ/HAMP	7
BP	GO:0044364	disruption of cells of other organism	7/361	61/18493	0.000179707	0.00133943	0.00102093	P2RX7/GNLY/IFNG/PRF1/FCER2/LYZ/HAMP	7
BP	GO:0002888	positive regulation of myeloid leukocyte mediated immunity	5/361	28/18493	0.000187201	0.00138848	0.00105832	ITGAM/FGR/FCER1G/BTK/ITGB2	5
BP	GO:0090022	regulation of neutrophil chemotaxis	5/361	28/18493	0.000187201	0.00138848	0.00105832	CCL19/CCL21/NCKAP1L/CCR7/C3AR1	5
BP	GO:0002639	positive regulation of immunoglobulin production	6/361	44/18493	0.000200299	0.00147842	0.00112688	CD28/PTPRC/TNFRSF4/MZB1/SASH3/TBX21	6
BP	GO:0050850	positive regulation of calcium-mediated signaling	6/361	44/18493	0.000200299	0.00147842	0.00112688	TRAT1/CD3E/CD4/CCL3/ZAP70/CCL4	6
BP	GO:0050690	regulation of defense response to virus by virus	5/361	29/18493	0.000222607	0.00163514	0.00124633	CD28/DOCK2/CD247/CD4/LCK	5
BP	GO:0050718	positive regulation of interleukin-1 beta secretion	5/361	29/18493	0.000222607	0.00163514	0.00124633	P2RX7/CCL19/TLR8/CCL3/AIM2	5
BP	GO:0032732	positive regulation of interleukin-1 production	6/361	45/18493	0.000227357	0.00166601	0.00126986	P2RX7/CCL19/TLR8/HAVCR2/CCL3/AIM2	6
BP	GO:0002711	positive regulation of T cell mediated immunity	6/361	46/18493	0.000257212	0.00187574	0.00142971	P2RX7/PTPRC/CD1E/SASH3/CD1B/IL12RB1	6
BP	GO:0032757	positive regulation of interleukin-8 production	6/361	46/18493	0.000257212	0.00187574	0.00142971	TLR8/TLR7/FCN1/CD2/CD14/CD244	6
BP	GO:0032635	interleukin-6 production	10/361	132/18493	0.000268779	0.0019554	0.00149043	P2RX7/CD200R1/IL18RAP/LILRB2/FCER1G/TLR8/HAVCR2/TLR7/NCKAP1L/SLAMF1	10
BP	GO:1903978	regulation of microglial cell activation	4/361	17/18493	0.000277915	0.00201224	0.00153376	ITGAM/PTPRC/STAP1/ITGB2	4
BP	GO:1905523	positive regulation of macrophage migration	4/361	17/18493	0.000277915	0.00201224	0.00153376	CCL5/P2RY12/CMKLR1/C3AR1	4
BP	GO:0030260	entry into host cell	10/361	133/18493	0.000285689	0.00204901	0.00156179	CD80/TNFRSF4/CD4/CD209/CCR5/MRC1/FCN1/SLAMF1/SELPLG/CD86	10
BP	GO:0044409	entry into host	10/361	133/18493	0.000285689	0.00204901	0.00156179	CD80/TNFRSF4/CD4/CD209/CCR5/MRC1/FCN1/SLAMF1/SELPLG/CD86	10
BP	GO:0051806	entry into cell of other organism involved in symbiotic interaction	10/361	133/18493	0.000285689	0.00204901	0.00156179	CD80/TNFRSF4/CD4/CD209/CCR5/MRC1/FCN1/SLAMF1/SELPLG/CD86	10
BP	GO:0051828	entry into other organism involved in symbiotic interaction	10/361	133/18493	0.000285689	0.00204901	0.00156179	CD80/TNFRSF4/CD4/CD209/CCR5/MRC1/FCN1/SLAMF1/SELPLG/CD86	10
BP	GO:0032677	regulation of interleukin-8 production	7/361	66/18493	0.000295153	0.00211191	0.00160973	PTPRC/TLR8/TLR7/FCN1/CD2/CD14/CD244	7
BP	GO:0019884	antigen processing and presentation of exogenous antigen	10/361	134/18493	0.00030348	0.00216639	0.00165125	FCGR1B/FCER1G/FCGR2B/CD1E/CTSE/HLA-DQA1/CD1B/FCGR1A/LAG3/HLA-DQA2	10
BP	GO:0051482	positive regulation of cytosolic calcium ion concentration involved in phospholipase C-activating G protein-coupled signaling pathway	5/361	31/18493	0.000308469	0.00219171	0.00167056	GPR174/GPR65/P2RY8/P2RY10/C3AR1	5
BP	GO:1902622	regulation of neutrophil migration	5/361	31/18493	0.000308469	0.00219171	0.00167056	CCL19/CCL21/NCKAP1L/CCR7/C3AR1	5
BP	GO:0002433	immune response-regulating cell surface receptor signaling pathway involved in phagocytosis	10/361	135/18493	0.000322187	0.00227854	0.00173673	FGR/PTPRC/CD247/FCGR2B/FCGR3A/CD3G/WAS/NCKAP1L/FCGR1A/FCGR2A	10
BP	GO:0038096	Fc-gamma receptor signaling pathway involved in phagocytosis	10/361	135/18493	0.000322187	0.00227854	0.00173673	FGR/PTPRC/CD247/FCGR2B/FCGR3A/CD3G/WAS/NCKAP1L/FCGR1A/FCGR2A	10
BP	GO:0002544	chronic inflammatory response	4/361	18/18493	0.000351844	0.0024825	0.0018922	CCL5/CXCL13/LTA/VCAM1	4
BP	GO:0032735	positive regulation of interleukin-12 production	5/361	32/18493	0.000359793	0.00253271	0.00193047	CCL19/IRF8/IFNG/CCR7/CD40LG	5
BP	GO:0050704	regulation of interleukin-1 secretion	6/361	49/18493	0.000365589	0.00256756	0.00195703	P2RX7/CCL19/TLR8/CCL3/AIM2/CCR7	6
BP	GO:0060333	interferon-gamma-mediated signaling pathway	8/361	90/18493	0.000375881	0.00263377	0.0020075	IRF4/FCGR1B/IRF8/IFNG/HLA-DQA1/FCGR1A/VCAM1/HLA-DQA2	8
BP	GO:0002761	regulation of myeloid leukocyte differentiation	9/361	114/18493	0.000399089	0.00278995	0.00212654	LILRB1/CD4/CCL3/TYROBP/IFNG/LILRB4/EVI2B/C1QC/LILRB3	9
BP	GO:0002702	positive regulation of production of molecular mediator of immune response	8/361	91/18493	0.000405228	0.00282637	0.0021543	CD28/PTPRC/FCER1G/TNFRSF4/MZB1/SASH3/TBX21/CD244	8
BP	GO:0034142	toll-like receptor 4 signaling pathway	5/361	33/18493	0.000417319	0.00289741	0.00220845	ITGAM/TNIP3/CD14/LY96/ITGB2	5
BP	GO:0045730	respiratory burst	5/361	33/18493	0.000417319	0.00289741	0.00220845	JCHAIN/CD52/CYBB/NCF1/NCF4	5
BP	GO:0014068	positive regulation of phosphatidylinositol 3-kinase signaling	7/361	70/18493	0.000425067	0.00294448	0.00224433	CD28/FGR/HCST/SELP/CCL5/NCF1/MYOC	7
BP	GO:0051928	positive regulation of calcium ion transport	9/361	116/18493	0.0004537	0.00313569	0.00239007	P2RX7/CXCL11/CD4/TRPV2/CXCL9/CCL3/CCL5/RAMP3/CCL4	9
BP	GO:0010959	regulation of metal ion transport	18/361	376/18493	0.000457012	0.00315141	0.00240205	P2RX7/LILRB1/CXCL11/CORO1A/LILRB2/FCRL3/CD4/IL16/TRPV2/CXCL9/CCL3/CCL5/P2RY12/RAMP3/CD84/CCL4/HAMP/P2RX1	18
BP	GO:0002701	negative regulation of production of molecular mediator of immune response	5/361	34/18493	0.000481516	0.0033054	0.00251942	LILRB1/CD96/FCRL3/FCGR2B/TBX21	5
BP	GO:0050716	positive regulation of interleukin-1 secretion	5/361	34/18493	0.000481516	0.0033054	0.00251942	P2RX7/CCL19/TLR8/CCL3/AIM2	5
BP	GO:0009615	response to virus	16/361	315/18493	0.000495646	0.00339473	0.00258751	LILRB1/CCL19/FGR/PTPRC/TLR8/TLR7/CXCL9/AIM2/CCL5/IFNG/IL2RA/TBX21/CCL4/IL12RB1/PRF1/BTBD17	16
BP	GO:0043030	regulation of macrophage activation	6/361	52/18493	0.000506762	0.00346306	0.0026396	ITGAM/PTPRC/FCGR2B/HAVCR2/STAP1/ITGB2	6
BP	GO:0002827	positive regulation of T-helper 1 type immune response	4/361	20/18493	0.000540163	0.00365843	0.00278851	CCR2/CCL19/CD80/IL12RB1	4
BP	GO:0042533	tumor necrosis factor biosynthetic process	4/361	20/18493	0.000540163	0.00365843	0.00278851	LILRB1/CCR2/SPN/CYBB	4
BP	GO:0042534	regulation of tumor necrosis factor biosynthetic process	4/361	20/18493	0.000540163	0.00365843	0.00278851	LILRB1/CCR2/SPN/CYBB	4
BP	GO:0097242	amyloid-beta clearance	4/361	20/18493	0.000540163	0.00365843	0.00278851	ITGAM/MSR1/MARCO/ITGB2	4
BP	GO:0033209	tumor necrosis factor-mediated signaling pathway	9/361	119/18493	0.000547018	0.00369663	0.00281762	TNFRSF13B/TNFRSF4/AIM2/CD27/TNFRSF9/TNFRSF17/LTA/CD40LG/TNFSF13B	9
BP	GO:0032637	interleukin-8 production	7/361	73/18493	0.000549635	0.00370608	0.00282483	PTPRC/TLR8/TLR7/FCN1/CD2/CD14/CD244	7
BP	GO:0048246	macrophage chemotaxis	5/361	35/18493	0.00055287	0.00371964	0.00283517	CCL3/CCL5/CMKLR1/C3AR1/STAP1	5
BP	GO:0031348	negative regulation of defense response	12/361	199/18493	0.000559728	0.00375747	0.002864	CD200R1/LILRB1/CD96/PTPRC/FCGR2B/HAVCR2/IL2RA/SIGLEC10/TNFAIP8L2/APOD/ABCD2/SIGLEC11	12
BP	GO:0051896	regulation of protein kinase B signaling	13/361	228/18493	0.000567627	0.0038021	0.00289802	CD28/TRAT1/CCL19/CD80/CCL21/ICOS/LCK/CCL3/P2RY12/RAMP3/CCR7/CD86/MYOC	13
BP	GO:0031334	positive regulation of protein complex assembly	14/361	259/18493	0.000599744	0.0040084	0.00305526	GMFG/CORO1A/PLEK/CCL21/WAS/NCKAP1L/AIM2/JCHAIN/IFNG/P2RY12/GBP5/CXCL13/CCR7/TCL1A	14
BP	GO:0043302	positive regulation of leukocyte degranulation	4/361	21/18493	0.000657056	0.00437223	0.00333257	ITGAM/FGR/FCER1G/ITGB2	4
BP	GO:0048245	eosinophil chemotaxis	4/361	21/18493	0.000657056	0.00437223	0.00333257	CCL23/CCL3/CCL5/CCL4	4
BP	GO:1902106	negative regulation of leukocyte differentiation	8/361	98/18493	0.000666965	0.00442847	0.00337545	LILRB1/FCGR2B/CCL3/TBX21/LILRB4/C1QC/CTLA4/LILRB3	8
BP	GO:0032675	regulation of interleukin-6 production	9/361	123/18493	0.000695362	0.00460696	0.0035115	P2RX7/CD200R1/LILRB2/FCER1G/TLR8/HAVCR2/TLR7/NCKAP1L/SLAMF1	9
BP	GO:0002455	humoral immune response mediated by circulating immunoglobulin	10/361	149/18493	0.000702691	0.00463532	0.00353311	PTPRC/FCGR2B/IGLL1/IGLL5/C1S/LTA/FCER2/C1QA/C1QC/C1QB	10
BP	GO:0002673	regulation of acute inflammatory response	10/361	149/18493	0.000702691	0.00463532	0.00353311	VTN/FCER1G/FCGR2B/C1S/CCR7/C1QA/BTK/C1QC/C3AR1/C1QB	10
BP	GO:0031663	lipopolysaccharide-mediated signaling pathway	6/361	56/18493	0.000757083	0.00497255	0.00379015	CD6/LY86/CCL3/CCL5/CD14/LY96	6
BP	GO:0035306	positive regulation of dephosphorylation	6/361	56/18493	0.000757083	0.00497255	0.00379015	LILRB2/PLEK/PPP1R16B/PTPRC/FCRL3/IFNG	6
BP	GO:0032652	regulation of interleukin-1 production	7/361	77/18493	0.000759088	0.00497497	0.003792	P2RX7/CCL19/TLR8/HAVCR2/CCL3/AIM2/CCR7	7
BP	GO:0032703	negative regulation of interleukin-2 production	4/361	22/18493	0.000790796	0.00516054	0.00393344	PTPRC/HAVCR2/TBX21/LAG3	4
BP	GO:0045624	positive regulation of T-helper cell differentiation	4/361	22/18493	0.000790796	0.00516054	0.00393344	CCL19/CD80/IL12RB1/CD86	4
BP	GO:0001820	serotonin secretion	3/361	10/18493	0.00079945	0.00516163	0.00393427	LILRB1/FCER1G/P2RX1	3
BP	GO:0002664	regulation of T cell tolerance induction	3/361	10/18493	0.00079945	0.00516163	0.00393427	LILRB2/CD3E/IL2RA	3
BP	GO:0002887	negative regulation of myeloid leukocyte mediated immunity	3/361	10/18493	0.00079945	0.00516163	0.00393427	CCR2/FCGR2B/CD84	3
BP	GO:0048304	positive regulation of isotype switching to IgG isotypes	3/361	10/18493	0.00079945	0.00516163	0.00393427	CD28/PTPRC/TBX21	3
BP	GO:2001198	regulation of dendritic cell differentiation	3/361	10/18493	0.00079945	0.00516163	0.00393427	LILRB1/LILRB2/FCGR2B	3
BP	GO:0032731	positive regulation of interleukin-1 beta production	5/361	38/18493	0.000814896	0.00525021	0.00400179	P2RX7/CCL19/TLR8/CCL3/AIM2	5
BP	GO:0030168	platelet activation	10/361	152/18493	0.000819904	0.0052713	0.00401786	PLEK/FCER1G/SELP/LCK/P2RY12/LCP2/CD40LG/PRKCB/FERMT3/P2RX1	10
BP	GO:0002831	regulation of response to biotic stimulus	9/361	130/18493	0.00103314	0.00662467	0.00504942	LILRB1/LY86/HAVCR2/AIM2/IL2RA/CRTAM/IL12RB1/LY96/SIGLEC11	9
BP	GO:0034122	negative regulation of toll-like receptor signaling pathway	5/361	40/18493	0.00103476	0.00662467	0.00504942	CD300LF/IRF4/CD14/LY96/LILRA4	5
BP	GO:0002281	macrophage activation involved in immune response	3/361	11/18493	0.00108339	0.00683523	0.00520991	SUCNR1/HAVCR2/TYROBP	3
BP	GO:0035747	natural killer cell chemotaxis	3/361	11/18493	0.00108339	0.00683523	0.00520991	CCL3/CCL5/CCL4	3
BP	GO:0042535	positive regulation of tumor necrosis factor biosynthetic process	3/361	11/18493	0.00108339	0.00683523	0.00520991	CCR2/SPN/CYBB	3
BP	GO:0043301	negative regulation of leukocyte degranulation	3/361	11/18493	0.00108339	0.00683523	0.00520991	CCR2/FCGR2B/CD84	3
BP	GO:0060100	positive regulation of phagocytosis, engulfment	3/361	11/18493	0.00108339	0.00683523	0.00520991	ITGAM/NCKAP1L/STAP1	3
BP	GO:1902563	regulation of neutrophil activation	3/361	11/18493	0.00108339	0.00683523	0.00520991	ITGAM/FCGR2B/ITGB2	3
BP	GO:1905155	positive regulation of membrane invagination	3/361	11/18493	0.00108339	0.00683523	0.00520991	ITGAM/NCKAP1L/STAP1	3
BP	GO:0010758	regulation of macrophage chemotaxis	4/361	24/18493	0.00111393	0.00699887	0.00533464	CCL5/CMKLR1/C3AR1/STAP1	4
BP	GO:2000482	regulation of interleukin-8 secretion	4/361	24/18493	0.00111393	0.00699887	0.00533464	FCN1/CD2/CD14/CD244	4
BP	GO:0014066	regulation of phosphatidylinositol 3-kinase signaling	8/361	106/18493	0.00111746	0.00700661	0.00534054	CD28/FGR/PPP1R16B/HCST/SELP/CCL5/NCF1/MYOC	8
BP	GO:0007584	response to nutrient	12/361	216/18493	0.00114633	0.00717282	0.00546723	P2RX7/CD3E/CD4/SELL/P2RY12/CYBB/LTA/FOLR2/HAMP/VCAM1/P2RX1/GCGR	12
BP	GO:0045637	regulation of myeloid cell differentiation	13/361	248/18493	0.00123142	0.00768939	0.00586097	LILRB1/SPI1/CD4/CCL3/NCKAP1L/TYROBP/IFNG/LILRB4/EVI2B/C1QC/PRKCB/GPR171/LILRB3	13
BP	GO:0071675	regulation of mononuclear cell migration	5/361	42/18493	0.00129582	0.00807498	0.00615487	CCR2/AIF1/CCL5/CMKLR1/C3AR1	5
BP	GO:0072677	eosinophil migration	4/361	25/18493	0.00130588	0.00812101	0.00618995	CCL23/CCL3/CCL5/CCL4	4
BP	GO:0002716	negative regulation of natural killer cell mediated immunity	3/361	12/18493	0.0014237	0.00876411	0.00668013	LILRB1/CD96/HAVCR2	3
BP	GO:0038110	interleukin-2-mediated signaling pathway	3/361	12/18493	0.0014237	0.00876411	0.00668013	IL2RA/IL2RB/IL2RG	3
BP	GO:0043922	negative regulation by host of viral transcription	3/361	12/18493	0.0014237	0.00876411	0.00668013	CCL3/CCL5/CCL4	3
BP	GO:0045579	positive regulation of B cell differentiation	3/361	12/18493	0.0014237	0.00876411	0.00668013	NCKAP1L/CD27/BTK	3
BP	GO:0051712	positive regulation of killing of cells of other organism	3/361	12/18493	0.0014237	0.00876411	0.00668013	IFNG/PRF1/FCER2	3
BP	GO:0002534	cytokine production involved in inflammatory response	5/361	43/18493	0.00144319	0.00886612	0.00675788	CD96/CD6/GBP5/APOD/ABCD2	5
BP	GO:0043032	positive regulation of macrophage activation	4/361	26/18493	0.00151979	0.00931789	0.00710223	ITGAM/HAVCR2/STAP1/ITGB2	4
BP	GO:0032651	regulation of interleukin-1 beta production	6/361	64/18493	0.00153452	0.00935162	0.00712794	P2RX7/CCL19/TLR8/CCL3/AIM2/CCR7	6
BP	GO:0045670	regulation of osteoclast differentiation	6/361	64/18493	0.00153452	0.00935162	0.00712794	LILRB1/CCL3/TYROBP/IFNG/LILRB4/LILRB3	6
BP	GO:0050710	negative regulation of cytokine secretion	6/361	64/18493	0.00153452	0.00935162	0.00712794	CD200R1/LILRB1/TNFRSF4/TLR8/FCGR2B/SRGN	6
BP	GO:0051235	maintenance of location	15/361	318/18493	0.00154479	0.00939543	0.00716133	P2RX7/CXCL11/CCL19/CORO1A/FASLG/PTPRC/MSR1/CCL21/CD4/CXCL9/LCK/CCR5/CCL3/SRGN/CCR7	15
BP	GO:0048002	antigen processing and presentation of peptide antigen	9/361	139/18493	0.00165099	0.0100213	0.00763836	FCGR1B/FCER1G/FCGR2B/CD209/CTSE/HLA-DQA1/FCGR1A/LAG3/HLA-DQA2	9
BP	GO:0034121	regulation of toll-like receptor signaling pathway	6/361	65/18493	0.00166328	0.0100758	0.00767992	CD300LF/IRF4/FCRL3/CD14/LY96/LILRA4	6
BP	GO:0019058	viral life cycle	14/361	289/18493	0.00171332	0.0103583	0.00789523	CD28/CD80/TNFRSF4/CXCR6/CD4/CD209/CCR5/MRC1/CCL5/FCN1/SLAMF1/SELPLG/CD86/BTBD17	14
BP	GO:0002756	MyD88-independent toll-like receptor signaling pathway	4/361	27/18493	0.00175692	0.0105589	0.00804815	CD300LF/TNIP3/CD14/LY96	4
BP	GO:0032660	regulation of interleukin-17 production	4/361	27/18493	0.00175692	0.0105589	0.00804815	SLAMF6/NCKAP1L/IFNG/LY9	4
BP	GO:0045671	negative regulation of osteoclast differentiation	4/361	27/18493	0.00175692	0.0105589	0.00804815	LILRB1/CCL3/LILRB4/LILRB3	4
BP	GO:0035723	interleukin-15-mediated signaling pathway	3/361	13/18493	0.00182416	0.0108489	0.0082692	CD4/IL2RB/IL2RG	3
BP	GO:0048302	regulation of isotype switching to IgG isotypes	3/361	13/18493	0.00182416	0.0108489	0.0082692	CD28/PTPRC/TBX21	3
BP	GO:0060099	regulation of phagocytosis, engulfment	3/361	13/18493	0.00182416	0.0108489	0.0082692	ITGAM/NCKAP1L/STAP1	3
BP	GO:0071350	cellular response to interleukin-15	3/361	13/18493	0.00182416	0.0108489	0.0082692	CD4/IL2RB/IL2RG	3
BP	GO:0071352	cellular response to interleukin-2	3/361	13/18493	0.00182416	0.0108489	0.0082692	IL2RA/IL2RB/IL2RG	3
BP	GO:0043901	negative regulation of multi-organism process	10/361	169/18493	0.00182658	0.0108489	0.0082692	IRF8/HAVCR2/CCL3/CCL5/IL2RA/FCN1/CCL4/LTA/SIGLEC11/BTBD17	10
BP	GO:0051051	negative regulation of transport	20/361	495/18493	0.00183145	0.0108566	0.00827505	CD200R1/LILRB1/CCR2/TRAT1/CD300LF/CORO1A/MMP9/LILRB2/TNFRSF4/TLR8/FCGR2B/APOC2/SRGN/P2RY12/CD84/TIFAB/APOC1/APOD/HAMP/PRKCB	20
BP	GO:0006956	complement activation	10/361	170/18493	0.00190795	0.0112881	0.00860396	VTN/IGLL1/VSIG4/IGLL5/C1S/FCN1/C1QA/C1QC/C3AR1/C1QB	10
BP	GO:0032647	regulation of interferon-alpha production	4/361	28/18493	0.00201854	0.0118731	0.00904985	TLR8/HAVCR2/TLR7/LILRA4	4
BP	GO:0035025	positive regulation of Rho protein signal transduction	4/361	28/18493	0.00201854	0.0118731	0.00904985	GPR174/GPR65/P2RY8/P2RY10	4
BP	GO:0072606	interleukin-8 secretion	4/361	28/18493	0.00201854	0.0118731	0.00904985	FCN1/CD2/CD14/CD244	4
BP	GO:0002220	innate immune response activating cell surface receptor signaling pathway	6/361	68/18493	0.00209913	0.0123233	0.009393	FCER1G/CD209/FCN1/CLEC4E/ICAM3/CLEC10A	6
BP	GO:0002204	somatic recombination of immunoglobulin genes involved in immune response	5/361	47/18493	0.00215819	0.0125729	0.00958325	CD28/PTPRC/BATF/TBX21/CD40LG	5
BP	GO:0002208	somatic diversification of immunoglobulins involved in immune response	5/361	47/18493	0.00215819	0.0125729	0.00958325	CD28/PTPRC/BATF/TBX21/CD40LG	5
BP	GO:0002762	negative regulation of myeloid leukocyte differentiation	5/361	47/18493	0.00215819	0.0125729	0.00958325	LILRB1/CCL3/LILRB4/C1QC/LILRB3	5
BP	GO:0045190	isotype switching	5/361	47/18493	0.00215819	0.0125729	0.00958325	CD28/PTPRC/BATF/TBX21/CD40LG	5
BP	GO:0010759	positive regulation of macrophage chemotaxis	3/361	14/18493	0.00228827	0.0131543	0.0100264	CCL5/CMKLR1/C3AR1	3
BP	GO:0045591	positive regulation of regulatory T cell differentiation	3/361	14/18493	0.00228827	0.0131543	0.0100264	LILRB2/IFNG/LILRB4	3
BP	GO:0048291	isotype switching to IgG isotypes	3/361	14/18493	0.00228827	0.0131543	0.0100264	CD28/PTPRC/TBX21	3
BP	GO:0070669	response to interleukin-2	3/361	14/18493	0.00228827	0.0131543	0.0100264	IL2RA/IL2RB/IL2RG	3
BP	GO:0070672	response to interleukin-15	3/361	14/18493	0.00228827	0.0131543	0.0100264	CD4/IL2RB/IL2RG	3
BP	GO:0150078	positive regulation of neuroinflammatory response	3/361	14/18493	0.00228827	0.0131543	0.0100264	ITGAM/STAP1/ITGB2	3
BP	GO:1905153	regulation of membrane invagination	3/361	14/18493	0.00228827	0.0131543	0.0100264	ITGAM/NCKAP1L/STAP1	3
BP	GO:0032607	interferon-alpha production	4/361	29/18493	0.00230589	0.0132306	0.0100846	TLR8/HAVCR2/TLR7/LILRA4	4
BP	GO:0008347	glial cell migration	5/361	48/18493	0.00237122	0.0135798	0.0103507	CCR2/GPR183/CCL3/P2RY12/STAP1	5
BP	GO:0006644	phospholipid metabolic process	19/361	473/18493	0.00251871	0.0143974	0.0109739	CD28/TRAT1/CCL19/CD80/FGR/PLEK/CCL21/ICOS/PLA2G2D/LCK/APOC2/P2RY12/CSF1R/APOC1/CCR7/SLA2/CD86/AGAP2/EPHA8	19
BP	GO:1903305	regulation of regulated secretory pathway	9/361	148/18493	0.00253528	0.0144649	0.0110254	CCR2/ITGAM/FGR/FCER1G/FCGR2B/CD84/PRKCB/P2RX1/ITGB2	9
BP	GO:0002367	cytokine production involved in immune response	7/361	95/18493	0.00258932	0.0147456	0.0112393	LILRB1/CD96/IL18RAP/FCER1G/SASH3/TBX21/BTK	7
BP	GO:0001782	B cell homeostasis	4/361	30/18493	0.0026202	0.0148935	0.0113521	TNFRSF13B/GAPT/NCKAP1L/TNFSF13B	4
BP	GO:1903707	negative regulation of hemopoiesis	9/361	150/18493	0.0027752	0.0157451	0.0120012	LILRB1/FCGR2B/CCL3/TBX21/LILRB4/C1QC/CTLA4/GPR171/LILRB3	9
BP	GO:0006837	serotonin transport	3/361	15/18493	0.00281924	0.0159355	0.0121463	LILRB1/FCER1G/P2RX1	3
BP	GO:0042268	regulation of cytolysis	3/361	15/18493	0.00281924	0.0159355	0.0121463	P2RX7/LILRB1/PAX2	3
BP	GO:0016447	somatic recombination of immunoglobulin gene segments	5/361	50/18493	0.00284252	0.0160373	0.0122238	CD28/PTPRC/BATF/TBX21/CD40LG	5
BP	GO:0032620	interleukin-17 production	4/361	31/18493	0.00296268	0.0165921	0.0126467	SLAMF6/NCKAP1L/IFNG/LY9	4
BP	GO:0032689	negative regulation of interferon-gamma production	4/361	31/18493	0.00296268	0.0165921	0.0126467	LILRB1/CD96/HAVCR2/PDCD1LG2	4
BP	GO:0042554	superoxide anion generation	4/361	31/18493	0.00296268	0.0165921	0.0126467	ITGAM/CYBB/NCF1/ITGB2	4
BP	GO:0048873	homeostasis of number of cells within a tissue	4/361	31/18493	0.00296268	0.0165921	0.0126467	P2RX7/CCR2/CORO1A/SASH3	4
BP	GO:0050730	regulation of peptidyl-tyrosine phosphorylation	12/361	245/18493	0.00327349	0.0182991	0.0139478	SAMSN1/CD80/VTN/CD3E/PTPRC/CD4/CCL5/IFNG/CSF1R/NCF1/STAP1/ITGB2	12
BP	GO:0002478	antigen processing and presentation of exogenous peptide antigen	8/361	126/18493	0.0033297	0.0185719	0.0141558	FCGR1B/FCER1G/FCGR2B/CTSE/HLA-DQA1/FCGR1A/LAG3/HLA-DQA2	8
BP	GO:0071353	cellular response to interleukin-4	4/361	32/18493	0.00333452	0.0185719	0.0141558	CD300LF/CORO1A/MRC1/IL2RG	4
BP	GO:0033033	negative regulation of myeloid cell apoptotic process	3/361	16/18493	0.00342003	0.0189786	0.0144658	FCER1G/CCR5/CCL5	3
BP	GO:0045072	regulation of interferon-gamma biosynthetic process	3/361	16/18493	0.00342003	0.0189786	0.0144658	LILRB1/TLR8/TLR7	3
BP	GO:0050731	positive regulation of peptidyl-tyrosine phosphorylation	10/361	186/18493	0.00365789	0.0202617	0.0154437	CD80/VTN/CD3E/PTPRC/CD4/CCL5/IFNG/CSF1R/NCF1/STAP1	10
BP	GO:0033198	response to ATP	4/361	33/18493	0.00373689	0.0206616	0.0157486	P2RX7/SELL/P2RY12/P2RX1	4
BP	GO:0002718	regulation of cytokine production involved in immune response	6/361	77/18493	0.0039295	0.0216871	0.0165303	LILRB1/CD96/FCER1G/SASH3/TBX21/BTK	6
BP	GO:0010524	positive regulation of calcium ion transport into cytosol	5/361	54/18493	0.00398249	0.0219398	0.0167228	P2RX7/CXCL11/CD4/CXCL9/RAMP3	5
BP	GO:0002418	immune response to tumor cell	3/361	17/18493	0.00409334	0.0223119	0.0170064	HAVCR2/CRTAM/PRF1	3
BP	GO:0032693	negative regulation of interleukin-10 production	3/361	17/18493	0.00409334	0.0223119	0.0170064	LILRB1/FCGR2B/PDCD1LG2	3
BP	GO:0042095	interferon-gamma biosynthetic process	3/361	17/18493	0.00409334	0.0223119	0.0170064	LILRB1/TLR8/TLR7	3
BP	GO:0072643	interferon-gamma secretion	3/361	17/18493	0.00409334	0.0223119	0.0170064	LILRB1/CD2/CD244	3
BP	GO:0090280	positive regulation of calcium ion import	3/361	17/18493	0.00409334	0.0223119	0.0170064	TRPV2/CCL3/RAMP3	3
BP	GO:0051495	positive regulation of cytoskeleton organization	11/361	220/18493	0.00409405	0.0223119	0.0170064	P2RX7/GMFG/CORO1A/PLEK/CCL21/WAS/NCKAP1L/GPR65/CCR7/STAP1/MYOC	11
BP	GO:0010922	positive regulation of phosphatase activity	4/361	34/18493	0.00417095	0.0226902	0.0172948	PLEK/PTPRC/FCRL3/IFNG	4
BP	GO:0007160	cell-matrix adhesion	11/361	222/18493	0.00438081	0.0237893	0.0181326	CD96/VTN/CD3E/CCL21/ITGAL/CCR7/SIGLEC1/APOD/VCAM1/MYOC/ITGB2	11
BP	GO:0043902	positive regulation of multi-organism process	9/361	162/18493	0.00461617	0.0250228	0.0190727	CD28/CD4/LY86/HAVCR2/CCL5/IFNG/PRF1/FCER2/LY96	9
BP	GO:0070670	response to interleukin-4	4/361	35/18493	0.00463779	0.0250952	0.019128	CD300LF/CORO1A/MRC1/IL2RG	4
BP	GO:0045806	negative regulation of endocytosis	5/361	56/18493	0.00466056	0.0251736	0.0191877	LILRB1/CD300LF/FCGR2B/APOC2/APOC1	5
BP	GO:0045165	cell fate commitment	12/361	257/18493	0.00478935	0.0258234	0.019683	SLAMF6/IRF4/GDF3/SPN/BATF/TBX21/IL12RB1/EOMES/LY9/PAX2/MYOD1/GBX1	12
BP	GO:0043011	myeloid dendritic cell differentiation	3/361	18/18493	0.00484163	0.0258759	0.019723	SPI1/IRF4/BATF	3
BP	GO:0045063	T-helper 1 cell differentiation	3/361	18/18493	0.00484163	0.0258759	0.019723	CCL19/CD80/SPN	3
BP	GO:0070230	positive regulation of lymphocyte apoptotic process	3/361	18/18493	0.00484163	0.0258759	0.019723	P2RX7/PDCD1/CCL5	3
BP	GO:0090026	positive regulation of monocyte chemotaxis	3/361	18/18493	0.00484163	0.0258759	0.019723	CCR2/AIF1/CCL5	3
BP	GO:1901741	positive regulation of myoblast fusion	3/361	18/18493	0.00484163	0.0258759	0.019723	CD53/CXCL9/MYOD1	3
BP	GO:0072376	protein activation cascade	10/361	194/18493	0.00491611	0.0262279	0.0199913	VTN/IGLL1/VSIG4/IGLL5/C1S/FCN1/C1QA/C1QC/C3AR1/C1QB	10
BP	GO:0048015	phosphatidylinositol-mediated signaling	9/361	164/18493	0.00499855	0.026621	0.0202909	CD28/FGR/PPP1R16B/HCST/SELP/CCL5/CSF1R/NCF1/MYOC	9
BP	GO:0042092	type 2 immune response	4/361	36/18493	0.00513853	0.027271	0.0207864	CCR2/BATF/TBX21/CD86	4
BP	GO:0090279	regulation of calcium ion import	4/361	36/18493	0.00513853	0.027271	0.0207864	FCRL3/TRPV2/CCL3/RAMP3	4
BP	GO:0014065	phosphatidylinositol 3-kinase signaling	8/361	136/18493	0.00528112	0.0279789	0.0213259	CD28/FGR/PPP1R16B/HCST/SELP/CCL5/NCF1/MYOC	8
BP	GO:0010518	positive regulation of phospholipase activity	5/361	58/18493	0.00541687	0.0286482	0.0218361	S1PR4/APOC2/CCL5/P2RY12/ITK	5
BP	GO:0032102	negative regulation of response to external stimulus	14/361	329/18493	0.00546678	0.028862	0.021999	CD200R1/VTN/PTPRC/AIF1/FCGR2B/HAVCR2/IL2RA/CXCL13/SIGLEC10/TNFAIP8L2/APOD/STAP1/ABCD2/SIGLEC11	14
BP	GO:0048017	inositol lipid-mediated signaling	9/361	167/18493	0.00561771	0.0296074	0.0225672	CD28/FGR/PPP1R16B/HCST/SELP/CCL5/CSF1R/NCF1/MYOC	9
BP	GO:0010560	positive regulation of glycoprotein biosynthetic process	3/361	19/18493	0.00566716	0.0297648	0.0226872	CCL19/CCL21/CCR7	3
BP	GO:0071731	response to nitric oxide	3/361	19/18493	0.00566716	0.0297648	0.0226872	CCL19/CCR7/DPEP1	3
BP	GO:0002562	somatic diversification of immune receptors via germline recombination within a single locus	5/361	59/18493	0.0058258	0.0304927	0.023242	CD28/PTPRC/BATF/TBX21/CD40LG	5
BP	GO:0016444	somatic cell DNA recombination	5/361	59/18493	0.0058258	0.0304927	0.023242	CD28/PTPRC/BATF/TBX21/CD40LG	5
BP	GO:0097305	response to alcohol	11/361	231/18493	0.00587488	0.0306967	0.0233975	SPI1/CCL19/CCL21/CCR5/CCL3/CD27/CYBB/CCR7/CD14/HAMP/VCAM1	11
BP	GO:0050728	negative regulation of inflammatory response	8/361	139/18493	0.00600971	0.0313474	0.0238934	CD200R1/PTPRC/FCGR2B/IL2RA/SIGLEC10/TNFAIP8L2/APOD/ABCD2	8
BP	GO:0046854	phosphatidylinositol phosphorylation	7/361	111/18493	0.0061156	0.0318451	0.0242728	CD28/TRAT1/CD80/ICOS/LCK/SLA2/CD86	7
BP	GO:0007596	blood coagulation	14/361	334/18493	0.00621884	0.0323273	0.0246404	P2RX7/VTN/PLEK/FCER1G/SELP/LCK/WAS/P2RY12/LCP2/SERPIND1/CD40LG/PRKCB/FERMT3/P2RX1	14
BP	GO:0046488	phosphatidylinositol metabolic process	11/361	233/18493	0.0062558	0.0324097	0.0247031	CD28/TRAT1/CD80/PLEK/ICOS/PLA2G2D/LCK/CSF1R/SLA2/CD86/AGAP2	11
BP	GO:0016445	somatic diversification of immunoglobulins	5/361	60/18493	0.00625599	0.0324097	0.0247031	CD28/PTPRC/BATF/TBX21/CD40LG	5
BP	GO:0046330	positive regulation of JNK cascade	8/361	140/18493	0.00626879	0.0324207	0.0247116	CCL19/CCL21/FCGR2B/CD27/CCR7/SLAMF1/CD40LG/NCF1	8
BP	GO:0031579	membrane raft organization	3/361	20/18493	0.00657192	0.0338159	0.025775	DOCK2/PTPRC/CD2	3
BP	GO:0042832	defense response to protozoan	3/361	20/18493	0.00657192	0.0338159	0.025775	IRF4/IRF8/BATF	3
BP	GO:1901739	regulation of myoblast fusion	3/361	20/18493	0.00657192	0.0338159	0.025775	CD53/CXCL9/MYOD1	3
BP	GO:0033003	regulation of mast cell activation	4/361	39/18493	0.0068546	0.0351515	0.026793	CD300LF/FGR/FCER1G/CD84	4
BP	GO:0045911	positive regulation of DNA recombination	4/361	39/18493	0.0068546	0.0351515	0.026793	CD28/PTPRC/WAS/TBX21	4
BP	GO:0017157	regulation of exocytosis	10/361	204/18493	0.00694087	0.035534	0.0270845	CCR2/ITGAM/FGR/FCER1G/FCGR2B/IFNG/CD84/PRKCB/P2RX1/ITGB2	10
BP	GO:0007599	hemostasis	14/361	339/18493	0.00705166	0.0360405	0.0274706	P2RX7/VTN/PLEK/FCER1G/SELP/LCK/WAS/P2RY12/LCP2/SERPIND1/CD40LG/PRKCB/FERMT3/P2RX1	14
BP	GO:0050817	coagulation	14/361	340/18493	0.00722843	0.036882	0.028112	P2RX7/VTN/PLEK/FCER1G/SELP/LCK/WAS/P2RY12/LCP2/SERPIND1/CD40LG/PRKCB/FERMT3/P2RX1	14
BP	GO:0030225	macrophage differentiation	4/361	40/18493	0.00750124	0.0380823	0.0290269	SPI1/MMP9/CSF1R/C1QC	4
BP	GO:0046006	regulation of activated T cell proliferation	4/361	40/18493	0.00750124	0.0380823	0.0290269	TMIGD2/IL2RA/PDCD1LG2/IL12RB1	4
BP	GO:1900015	regulation of cytokine production involved in inflammatory response	4/361	40/18493	0.00750124	0.0380823	0.0290269	CD6/GBP5/APOD/ABCD2	4
BP	GO:0001562	response to protozoan	3/361	21/18493	0.00755773	0.0382414	0.0291481	IRF4/IRF8/BATF	3
BP	GO:0048305	immunoglobulin secretion	3/361	21/18493	0.00755773	0.0382414	0.0291481	TNFRSF4/CD40LG/TNFSF13B	3
BP	GO:0051701	interaction with host	10/361	209/18493	0.00816959	0.0412686	0.0314556	CD80/TNFRSF4/CD4/CD209/CCR5/MRC1/FCN1/SLAMF1/SELPLG/CD86	10
BP	GO:0032715	negative regulation of interleukin-6 production	4/361	41/18493	0.0081868	0.041287	0.0314695	CD200R1/HAVCR2/NCKAP1L/SLAMF1	4
BP	GO:0045638	negative regulation of myeloid cell differentiation	6/361	90/18493	0.00836521	0.0421169	0.0321021	LILRB1/CCL3/LILRB4/C1QC/GPR171/LILRB3	6
BP	GO:0002347	response to tumor cell	3/361	22/18493	0.00862619	0.0431452	0.0328859	HAVCR2/CRTAM/PRF1	3
BP	GO:0006925	inflammatory cell apoptotic process	3/361	22/18493	0.00862619	0.0431452	0.0328859	FASLG/CCR5/CCL5	3
BP	GO:0035584	calcium-mediated signaling using intracellular calcium source	3/361	22/18493	0.00862619	0.0431452	0.0328859	PTPRC/SELP/VCAM1	3
BP	GO:0071677	positive regulation of mononuclear cell migration	3/361	22/18493	0.00862619	0.0431452	0.0328859	CCR2/AIF1/CCL5	3
BP	GO:0002223	stimulatory C-type lectin receptor signaling pathway	5/361	65/18493	0.00874529	0.043669	0.0332852	FCER1G/CD209/CLEC4E/ICAM3/CLEC10A	5
BP	GO:0048010	vascular endothelial growth factor receptor signaling pathway	6/361	91/18493	0.00881267	0.0439333	0.0334866	VTN/NCKAP1L/CYBB/NCF1/PRKCB/NCF4	6
BP	GO:0050918	positive chemotaxis	5/361	66/18493	0.00931457	0.0463594	0.0353358	CORO1A/IL16/CCR4/CCL3/CCL5	5
BP	GO:0002833	positive regulation of response to biotic stimulus	4/361	43/18493	0.00967821	0.0480121	0.0365956	LY86/HAVCR2/CRTAM/LY96	4
BP	GO:0035307	positive regulation of protein dephosphorylation	4/361	43/18493	0.00967821	0.0480121	0.0365956	LILRB2/PPP1R16B/PTPRC/FCRL3	4
BP	GO:0008360	regulation of cell shape	8/361	151/18493	0.00970969	0.0480898	0.0366548	CORO1A/FGR/ARHGAP15/RHOH/CCL3/LST1/CSF1R/ITGB2	8
BP	GO:0034695	response to prostaglandin E	3/361	23/18493	0.00977872	0.0481183	0.0366765	CCL19/CCL21/CCR7	3
BP	GO:0036037	CD8-positive, alpha-beta T cell activation	3/361	23/18493	0.00977872	0.0481183	0.0366765	LILRB1/NCKAP1L/EOMES	3
BP	GO:1903020	positive regulation of glycoprotein metabolic process	3/361	23/18493	0.00977872	0.0481183	0.0366765	CCL19/CCL21/CCR7	3
BP	GO:1903306	negative regulation of regulated secretory pathway	3/361	23/18493	0.00977872	0.0481183	0.0366765	CCR2/FCGR2B/CD84	3
CC	GO:0009897	external side of plasma membrane	66/383	359/19659	4.49079e-45	1.2215e-42	1.01634e-42	CD28/P2RX7/CD5/CD200R1/LILRB1/CCR2/ITGAM/CD80/CD33/KLRD1/CD163/CD3E/FASLG/PTPRC/CD6/CXCR1/FCER1G/TNFRSF4/CXCR6/TLR8/SELP/CD4/FCGR2B/IGLL1/CD79A/ICOS/PDCD1/XCR1/CCR4/CD209/CXCL9/CCR5/FCGR3A/IL7R/CD3G/SELL/CD27/IGLL5/P2RY12/MS4A1/TNFRSF9/IL2RA/IL2RB/FCN1/CCR8/CCR7/CD3D/CD2/PDCD1LG2/CXCR3/IL2RG/IL12RB1/CD14/FCER2/FOLR2/LAG3/CD40LG/CD244/VCAM1/CCRL2/CTLA4/CD86/CD8A/P2RX1/ITGB2/AQP4	66
CC	GO:0001772	immunological synapse	13/383	34/19659	3.04995e-14	4.14793e-12	3.45126e-12	CD28/CORO1A/CD3E/CD6/HAVCR2/CD53/RHOH/LCK/GZMB/ZAP70/GZMA/CD37/SCIMP	13
CC	GO:0042101	T cell receptor complex	10/383	17/19659	1.20749e-13	1.09479e-11	9.10913e-12	TRAT1/CD3E/CD6/CD247/CD4/CD3G/APBB1IP/ZAP70/CD3D/CD8A	10
CC	GO:0030667	secretory granule membrane	29/383	295/19659	9.06889e-13	6.16685e-11	5.13108e-11	ITGAM/CD33/LILRB2/PTPRC/CXCR1/FCER1G/SELP/SIGLEC9/CD53/GPR84/MCEMP1/NCKAP1L/SELL/TYROBP/SIGLEC14/CD38/ITGAL/CYBB/CD68/FPR1/CD14/CLEC12A/LAIR1/C3AR1/SIRPB1/FCGR2A/P2RX1/LILRB3/ITGB2	29
CC	GO:0043235	receptor complex	31/383	396/19659	5.54508e-11	3.01652e-09	2.50988e-09	CD200R1/ITGAM/TRAT1/KLRD1/IL18RAP/FCRL5/CD3E/CD6/CD247/ITGAD/CD4/KLRC2/TLR7/CD79A/GPR84/CD3G/APBB1IP/RAMP3/ZAP70/CSF1R/ITGAL/CD3D/IL2RG/IL12RB1/KLRC1/CD14/LY96/CD8A/CSF2RB/ITGB2/EPHA8	31
CC	GO:0070820	tertiary granule	18/383	164/19659	3.5922e-09	1.429e-07	1.18899e-07	ITGAM/CD33/MMP9/LILRB2/FCER1G/CD53/GPR84/MCEMP1/NCKAP1L/SIGLEC14/CYBB/FPR1/CLEC12A/LYZ/LAIR1/OSCAR/CHIT1/ITGB2	18
CC	GO:0098802	plasma membrane receptor complex	19/383	184/19659	3.67756e-09	1.429e-07	1.18899e-07	ITGAM/TRAT1/IL18RAP/CD3E/CD6/CD247/ITGAD/CD4/CD79A/CD3G/APBB1IP/RAMP3/ZAP70/ITGAL/CD3D/IL12RB1/CD8A/CSF2RB/ITGB2	19
CC	GO:0070821	tertiary granule membrane	12/383	73/19659	1.58867e-08	4.84686e-07	4.0328e-07	ITGAM/CD33/LILRB2/FCER1G/CD53/GPR84/MCEMP1/SIGLEC14/CYBB/CLEC12A/LAIR1/ITGB2	12
CC	GO:0042581	specific granule	17/383	160/19659	1.60374e-08	4.84686e-07	4.0328e-07	DOCK2/ITGAM/RETN/CD33/CD53/GPR84/MCEMP1/ITGAL/CYBB/CLEC12A/LYZ/LAIR1/C3AR1/P2RX1/OSCAR/CHIT1/ITGB2	17
CC	GO:0035579	specific granule membrane	12/383	91/19659	1.98952e-07	5.41151e-06	4.50261e-06	ITGAM/CD33/CD53/GPR84/MCEMP1/ITGAL/CYBB/CLEC12A/LAIR1/C3AR1/P2RX1/ITGB2	12
CC	GO:0098636	protein complex involved in cell adhesion	7/383	35/19659	4.2363e-06	0.000104752	8.71584e-05	CD28/ITGAM/CD80/ITGAD/ITGAL/CTLA4/ITGB2	7
CC	GO:0030139	endocytic vesicle	17/383	293/19659	6.72784e-05	0.00150794	0.00125468	GNLY/CORO1A/CD163/FCGR1B/MSR1/TLR7/STAB1/WAS/PLD4/MARCO/HLA-DQA1/CYBB/FCGR1A/NCF1/HLA-DQA2/CTLA4/NCF4	17
CC	GO:0101002	ficolin-1-rich granule	13/383	185/19659	7.20709e-05	0.00150794	0.00125468	GMFG/MMP9/LILRB2/FCER1G/NCKAP1L/BIN2/SIGLEC14/FCN1/HK3/MNDA/FPR1/FGL2/ITGB2	13
CC	GO:0001931	uropod	4/383	13/19659	8.82164e-05	0.00159966	0.00133098	PSTPIP1/SPN/SELPLG/SCIMP	4
CC	GO:0031254	cell trailing edge	4/383	13/19659	8.82164e-05	0.00159966	0.00133098	PSTPIP1/SPN/SELPLG/SCIMP	4
CC	GO:0045121	membrane raft	17/383	304/19659	0.000105526	0.00175685	0.00146177	ITGAM/KCNA3/FASLG/PTPRC/CD4/CD79A/LCK/P2RY12/ZAP70/LCP2/CD48/CD14/BTK/SELPLG/CD8A/P2RX1/ITGB2	17
CC	GO:0098857	membrane microdomain	17/383	305/19659	0.000109803	0.00175685	0.00146177	ITGAM/KCNA3/FASLG/PTPRC/CD4/CD79A/LCK/P2RY12/ZAP70/LCP2/CD48/CD14/BTK/SELPLG/CD8A/P2RX1/ITGB2	17
CC	GO:0098589	membrane region	17/383	316/19659	0.000167898	0.00253713	0.002111	ITGAM/KCNA3/FASLG/PTPRC/CD4/CD79A/LCK/P2RY12/ZAP70/LCP2/CD48/CD14/BTK/SELPLG/CD8A/P2RX1/ITGB2	17
CC	GO:0060205	cytoplasmic vesicle lumen	17/383	338/19659	0.00036848	0.00518393	0.00431326	CTSW/GNLY/DOCK2/RETN/GMFG/FGR/FASLG/BIN2/SRGN/FCN1/HK3/MNDA/ARHGAP9/LYZ/FERMT3/OSCAR/CHIT1	17
CC	GO:0031983	vesicle lumen	17/383	339/19659	0.000381171	0.00518393	0.00431326	CTSW/GNLY/DOCK2/RETN/GMFG/FGR/FASLG/BIN2/SRGN/FCN1/HK3/MNDA/ARHGAP9/LYZ/FERMT3/OSCAR/CHIT1	17
CC	GO:0030665	clathrin-coated vesicle membrane	8/383	107/19659	0.0011758	0.0146284	0.0121714	FCGR1B/CD4/IL7R/CD3G/HLA-DQA1/CD3D/FCGR1A/HLA-DQA2	8
CC	GO:0101003	ficolin-1-rich granule membrane	6/383	61/19659	0.00118318	0.0146284	0.0121714	LILRB2/FCER1G/NCKAP1L/SIGLEC14/FPR1/ITGB2	6
CC	GO:0030666	endocytic vesicle membrane	10/383	163/19659	0.00137981	0.0160502	0.0133544	CORO1A/CD163/FCGR1B/MSR1/STAB1/MARCO/HLA-DQA1/CYBB/FCGR1A/HLA-DQA2	10
CC	GO:0043020	NADPH oxidase complex	3/383	12/19659	0.00141619	0.0160502	0.0133544	CYBB/NCF1/NCF4	3
CC	GO:0005581	collagen trimer	7/383	87/19659	0.00154836	0.0168462	0.0140168	MSR1/MARCO/FCN1/C1QA/C1QC/C1QB/COL9A3	7
CC	GO:0034774	secretory granule lumen	15/383	321/19659	0.00167132	0.0174846	0.0145479	CTSW/DOCK2/RETN/GMFG/FGR/BIN2/SRGN/FCN1/HK3/MNDA/ARHGAP9/LYZ/FERMT3/OSCAR/CHIT1	15
CC	GO:0045335	phagocytic vesicle	8/383	124/19659	0.00298854	0.0301067	0.0250501	GNLY/CORO1A/TLR7/WAS/PLD4/CYBB/NCF1/NCF4	8
CC	GO:0008305	integrin complex	4/383	32/19659	0.00331324	0.0321858	0.0267799	ITGAM/ITGAD/ITGAL/ITGB2	4
CC	GO:0044853	plasma membrane raft	7/383	102/19659	0.00382104	0.0358388	0.0298194	ITGAM/FASLG/P2RY12/LCP2/SELPLG/CD8A/ITGB2	7
MF	GO:0004896	cytokine receptor activity	21/346	92/17632	6.20759e-17	2.50787e-14	2.0191e-14	CCR2/IL18RAP/CXCR1/CXCR6/CD4/IL21R/XCR1/CCR4/CCR5/IL7R/IL2RA/IL2RB/CCR8/CCR7/CXCR3/IL2RG/IL12RB1/CMKLR1/IL10RA/CCRL2/CSF2RB	21
MF	GO:0048020	CCR chemokine receptor binding	14/346	43/17632	4.53057e-14	9.15174e-12	7.36813e-12	CCL17/XCL2/CCR2/CCL19/CCL18/CCL21/CCL23/CCL3/CCL5/CCL3L1/CXCL13/CCL4/CCL14/CCRL2	14
MF	GO:0042379	chemokine receptor binding	16/346	66/17632	1.20348e-13	1.62069e-11	1.30483e-11	CCL17/XCL2/CXCL11/CCR2/CCL19/CCL18/CCL21/CCL23/CXCL9/CCL3/CCL5/CCL3L1/CXCL13/CCL4/CCL14/CCRL2	16
MF	GO:0019957	C-C chemokine binding	11/346	24/17632	2.81959e-13	2.83552e-11	2.2829e-11	CCR2/ACKR1/CXCR1/CXCR6/XCR1/CCR4/CCR5/CCR8/CCR7/CXCR3/CCRL2	11
MF	GO:0008009	chemokine activity	14/346	49/17632	3.50931e-13	2.83552e-11	2.2829e-11	CCL17/XCL2/CXCL11/CCL19/CCL18/CCL21/CCL23/CXCL9/CCL3/CCL5/CCL3L1/CXCL13/CCL4/CCL14	14
MF	GO:0030246	carbohydrate binding	28/346	269/17632	6.13121e-13	4.12835e-11	3.32376e-11	ASGR2/CD33/KLRD1/VTN/SELP/KLRC2/SIGLEC9/CD209/SIGLEC12/MRC1/KLRB1/SELL/SIGLEC14/SIGLEC10/FCN1/HK3/CLEC4E/CLEC2B/KLRC1/CLECL1/FCER2/SIGLEC7/SIGLEC1/CLEC12A/SIGLEC8/CLEC10A/SIGLEC11/LGALS7B	28
MF	GO:0001637	G protein-coupled chemoattractant receptor activity	11/346	26/17632	8.42606e-13	4.25516e-11	3.42586e-11	CCR2/CXCR1/CXCR6/XCR1/CCR4/CCR5/CCR8/CCR7/CXCR3/CMKLR1/CCRL2	11
MF	GO:0004950	chemokine receptor activity	11/346	26/17632	8.42606e-13	4.25516e-11	3.42586e-11	CCR2/CXCR1/CXCR6/XCR1/CCR4/CCR5/CCR8/CCR7/CXCR3/CMKLR1/CCRL2	11
MF	GO:0016493	C-C chemokine receptor activity	10/346	23/17632	6.78631e-12	3.0463e-10	2.4526e-10	CCR2/CXCR1/CXCR6/XCR1/CCR4/CCR5/CCR8/CCR7/CXCR3/CCRL2	10
MF	GO:0019956	chemokine binding	11/346	32/17632	1.26643e-11	5.11639e-10	4.11924e-10	CCR2/ACKR1/CXCR1/CXCR6/XCR1/CCR4/CCR5/CCR8/CCR7/CXCR3/CCRL2	11
MF	GO:0015026	coreceptor activity	12/346	42/17632	1.75801e-11	6.4567e-10	5.19834e-10	CD28/CD80/TMIGD2/CXCR6/CD4/CCR5/RAMP3/CCR8/LY96/CD86/CD8A/LILRA4	12
MF	GO:0019955	cytokine binding	18/346	125/17632	4.27534e-11	1.43936e-09	1.15884e-09	CCR2/ACKR1/CXCR1/CXCR6/CD4/XCR1/CCR4/CCR5/IL2RA/IL2RB/CSF1R/CCR8/CCR7/CXCR3/IL2RG/IL12RB1/IL10RA/CCRL2	18
MF	GO:0019865	immunoglobulin binding	9/346	23/17632	2.49548e-10	7.7552e-09	6.24376e-09	FCGR1B/FCER1G/CD4/FCGR2B/FCGR3A/JCHAIN/FCGR1A/FCER2/FCGR2A	9
MF	GO:0005126	cytokine receptor binding	25/346	281/17632	3.29371e-10	9.5047e-09	7.6523e-09	CCL17/XCL2/CXCL11/CCR2/CCL19/CD300LF/FASLG/CCL18/CCL21/GDF3/CCL23/CXCL9/CCL3/CCL5/IFNG/CCL3L1/CXCL13/CCL4/LTA/IL12RB1/CCL14/CD40LG/STAP1/CCRL2/TNFSF13B	25
MF	GO:0005125	cytokine activity	21/346	219/17632	2.31829e-09	6.24392e-08	5.02702e-08	CCL17/XCL2/CXCL11/CCL19/FASLG/CCL18/CCL21/GDF3/IL16/CCL23/CXCL9/CCL3/CCL5/IFNG/CCL3L1/CXCL13/CCL4/LTA/CCL14/CD40LG/TNFSF13B	21
MF	GO:0019864	IgG binding	6/346	11/17632	2.32567e-08	5.87233e-07	4.72785e-07	FCGR1B/FCER1G/FCGR2B/FCGR3A/FCGR1A/FCGR2A	6
MF	GO:0008528	G protein-coupled peptide receptor activity	16/346	145/17632	2.67362e-08	6.35377e-07	5.11547e-07	CCR2/CXCR1/CXCR6/XCR1/CCR4/GPR84/CCR5/FPR3/RAMP3/CCR8/CCR7/CXCR3/FPR1/CMKLR1/CCRL2/GCGR	16
MF	GO:0001653	peptide receptor activity	16/346	151/17632	4.76392e-08	1.06924e-06	8.60848e-07	CCR2/CXCR1/CXCR6/XCR1/CCR4/GPR84/CCR5/FPR3/RAMP3/CCR8/CCR7/CXCR3/FPR1/CMKLR1/CCRL2/GCGR	16
MF	GO:0001614	purinergic nucleotide receptor activity	7/346	21/17632	9.67994e-08	1.95535e-06	1.57426e-06	P2RX7/P2RY12/P2RY8/P2RY13/P2RY10/GPR171/P2RX1	7
MF	GO:0016502	nucleotide receptor activity	7/346	21/17632	9.67994e-08	1.95535e-06	1.57426e-06	P2RX7/P2RY12/P2RY8/P2RY13/P2RY10/GPR171/P2RX1	7
MF	GO:0035586	purinergic receptor activity	7/346	25/17632	3.73991e-07	7.19488e-06	5.79265e-06	P2RX7/P2RY12/P2RY8/P2RY13/P2RY10/GPR171/P2RX1	7
MF	GO:0001664	G protein-coupled receptor binding	20/346	274/17632	5.1729e-07	9.49933e-06	7.64798e-06	CCL17/XCL2/CXCL11/CCR2/CCL19/CCL18/CCL21/CCL23/CXCL9/CCL3/CCL5/CCL3L1/MARCO/CXCL13/FCN1/CCL4/FPR1/CCL14/CCRL2/MYOC	20
MF	GO:0008329	signaling pattern recognition receptor activity	6/346	20/17632	1.67999e-06	2.82798e-05	2.27682e-05	TLR8/TLR7/MARCO/FCN1/CD14/LY96	6
MF	GO:0038187	pattern recognition receptor activity	6/346	20/17632	1.67999e-06	2.82798e-05	2.27682e-05	TLR8/TLR7/MARCO/FCN1/CD14/LY96	6
MF	GO:0048018	receptor ligand activity	26/346	478/17632	2.98768e-06	4.82808e-05	3.88712e-05	CCL17/XCL2/CXCL11/RETN/CCL19/GMFG/FASLG/CCL18/CCL21/GDF3/IL16/CCL23/CXCL9/CCL3/CCL5/IFNG/CCL3L1/CXCL13/UTS2/PMCH/CCL4/LTA/CCL14/CD40LG/HAMP/TNFSF13B	26
MF	GO:0001608	G protein-coupled nucleotide receptor activity	5/346	14/17632	4.89283e-06	7.32112e-05	5.89428e-05	P2RY12/P2RY8/P2RY13/P2RY10/GPR171	5
MF	GO:0045028	G protein-coupled purinergic nucleotide receptor activity	5/346	14/17632	4.89283e-06	7.32112e-05	5.89428e-05	P2RY12/P2RY8/P2RY13/P2RY10/GPR171	5
MF	GO:0042287	MHC protein binding	7/346	36/17632	5.39391e-06	7.78265e-05	6.26586e-05	LILRB1/KLRD1/LILRB2/CD4/LAG3/CD244/CD8A	7
MF	GO:0038024	cargo receptor activity	10/346	84/17632	5.66422e-06	7.89085e-05	6.35297e-05	CD5/ASGR2/VTN/CD163/CD6/MSR1/STAB1/MRC1/MARCO/FOLR2	10
MF	GO:0003823	antigen binding	15/346	199/17632	9.44783e-06	0.000127231	0.000102434	KLRD1/KLRC2/IGLL1/CD1E/CD209/IL7R/JCHAIN/IGLL5/HLA-DQA1/LILRA1/SLAMF1/LILRB4/CD1B/CD48/LAG3	15
MF	GO:0001618	virus receptor activity	9/346	74/17632	1.39909e-05	0.000176636	0.000142211	CD80/TNFRSF4/CD4/CD209/CCR5/MRC1/SLAMF1/SELPLG/CD86	9
MF	GO:0104005	hijacked molecular function	9/346	74/17632	1.39909e-05	0.000176636	0.000142211	CD80/TNFRSF4/CD4/CD209/CCR5/MRC1/SLAMF1/SELPLG/CD86	9
MF	GO:0004715	non-membrane spanning protein tyrosine kinase activity	7/346	46/17632	2.92259e-05	0.000357795	0.000288064	BLK/FGR/LCK/ZAP70/ITK/SLA/BTK	7
MF	GO:0005044	scavenger receptor activity	7/346	51/17632	5.81215e-05	0.00069062	0.000556023	CD5/VTN/CD163/CD6/MSR1/STAB1/MARCO	7
MF	GO:0004252	serine-type endopeptidase activity	15/346	250/17632	0.000131786	0.00152118	0.00122472	MMP9/TPSB2/HPR/HTRA4/GZMH/GZMM/GZMK/GZMB/GZMA/C1S/FCN1/C1QA/C1QC/TPSAB1/C1QB	15
MF	GO:0035591	signaling adaptor activity	8/346	80/17632	0.000172005	0.00193028	0.00155408	CD28/TRAT1/SH2D1A/DOK2/GRAP2/SLA2/SLA/STAP1	8
MF	GO:0008236	serine-type peptidase activity	15/346	273/17632	0.00034151	0.00372892	0.00300218	MMP9/TPSB2/HPR/HTRA4/GZMH/GZMM/GZMK/GZMB/GZMA/C1S/FCN1/C1QA/C1QC/TPSAB1/C1QB	15
MF	GO:0017171	serine hydrolase activity	15/346	277/17632	0.000398219	0.0042337	0.00340858	MMP9/TPSB2/HPR/HTRA4/GZMH/GZMM/GZMK/GZMB/GZMA/C1S/FCN1/C1QA/C1QC/TPSAB1/C1QB	15
MF	GO:0001530	lipopolysaccharide binding	5/346	33/17632	0.000426982	0.00431252	0.00347204	P2RX7/CD6/SELP/CD14/LY96	5
MF	GO:0042169	SH2 domain binding	5/346	33/17632	0.000426982	0.00431252	0.00347204	LILRB1/SIT1/LCK/LAX1/SIGLEC10	5
MF	GO:0042288	MHC class I protein binding	4/346	19/17632	0.000447319	0.00440773	0.00354869	LILRB1/LILRB2/CD244/CD8A	4
MF	GO:0023023	MHC protein complex binding	4/346	20/17632	0.000550552	0.00529578	0.00426367	KLRD1/KLRC2/MS4A1/KLRC1	4
MF	GO:0005070	SH3/SH2 adaptor activity	6/346	54/17632	0.000638622	0.00600008	0.0048307	CD28/SH2D1A/GRAP2/SLA2/SLA/STAP1	6
MF	GO:0071723	lipopeptide binding	3/346	10/17632	0.000811416	0.00745027	0.00599826	CD1E/CD1B/CD14	3
MF	GO:1990782	protein tyrosine kinase binding	7/346	81/17632	0.00105696	0.00888416	0.00715269	TRAT1/DOK2/FCRL3/CD247/CD4/STAP1/MYOC	7
MF	GO:0001784	phosphotyrosine residue binding	5/346	40/17632	0.00105817	0.00888416	0.00715269	SAMSN1/FGR/LCK/ZAP70/STAP1	5
MF	GO:0016004	phospholipase activator activity	3/346	11/17632	0.00109952	0.00888416	0.00715269	CCL3/APOC2/CCL5	3
MF	GO:0016175	superoxide-generating NADPH oxidase activity	3/346	11/17632	0.00109952	0.00888416	0.00715269	CYBB/NCF1/PAX2	3
MF	GO:0033691	sialic acid binding	3/346	11/17632	0.00109952	0.00888416	0.00715269	SELP/FCN1/SIGLEC11	3
MF	GO:0045236	CXCR chemokine receptor binding	3/346	11/17632	0.00109952	0.00888416	0.00715269	CXCL11/CXCL9/CXCL13	3
MF	GO:0005068	transmembrane receptor protein tyrosine kinase adaptor activity	3/346	12/17632	0.0014448	0.0114451	0.00921453	TRAT1/DOK2/STAP1	3
MF	GO:0060229	lipase activator activity	3/346	13/17632	0.00185107	0.0143814	0.0115786	CCL3/APOC2/CCL5	3
MF	GO:0046934	phosphatidylinositol-4,5-bisphosphate 3-kinase activity	6/346	68/17632	0.00215223	0.0164057	0.0132083	CD28/TRAT1/CD80/ICOS/LCK/CD86	6
MF	GO:0004713	protein tyrosine kinase activity	10/346	177/17632	0.00265411	0.0193464	0.0155759	BLK/FGR/LCK/ZAP70/CSF1R/ITK/SLA/BTK/CSF2RB/EPHA8	10
MF	GO:0045309	protein phosphorylated amino acid binding	5/346	49/17632	0.00265615	0.0193464	0.0155759	SAMSN1/FGR/LCK/ZAP70/STAP1	5
MF	GO:0052813	phosphatidylinositol bisphosphate kinase activity	6/346	71/17632	0.00268168	0.0193464	0.0155759	CD28/TRAT1/CD80/ICOS/LCK/CD86	6
MF	GO:0005164	tumor necrosis factor receptor binding	4/346	31/17632	0.00301722	0.0213852	0.0172174	FASLG/LTA/CD40LG/TNFSF13B	4
MF	GO:0050664	oxidoreductase activity, acting on NAD(P)H, oxygen as acceptor	3/346	16/17632	0.00346974	0.0241685	0.0194582	CYBB/NCF1/PAX2	3
MF	GO:0005539	glycosaminoglycan binding	11/346	222/17632	0.00454122	0.030766	0.0247699	CXCL11/VTN/PTPRC/SELP/CCL23/STAB1/PLA2G2D/SELL/JCHAIN/CXCL13/SERPIND1	11
MF	GO:0035004	phosphatidylinositol 3-kinase activity	6/346	79/17632	0.00456921	0.030766	0.0247699	CD28/TRAT1/CD80/ICOS/LCK/CD86	6
MF	GO:0008201	heparin binding	9/346	163/17632	0.00495833	0.0328388	0.0264387	CXCL11/VTN/PTPRC/SELP/CCL23/PLA2G2D/SELL/CXCL13/SERPIND1	9
MF	GO:0030674	protein binding, bridging	9/346	168/17632	0.00602154	0.0392371	0.0315901	CD28/TRAT1/SH2D1A/DOK2/GRAP2/JCHAIN/SLA2/SLA/STAP1	9
MF	GO:0051861	glycolipid binding	3/346	20/17632	0.00666556	0.0427442	0.0344137	SELP/SELL/DPEP1	3
MF	GO:0001540	amyloid-beta binding	5/346	61/17632	0.00684911	0.043235	0.0348088	LILRB2/MSR1/FCGR2B/MARCO/ITGB2	5

## Sheet: KEGG
Supplementary Table 4. 711 GO terms and 36 KEGG terms of differentially expressed genes.
ID	Description	GeneRatio	BgRatio	pvalue	p.adjust	qvalue	geneID	Count
hsa04060	Cytokine-cytokine receptor interaction	47/225	294/7847	5.83531e-23	1.0912e-20	8.8451e-21	6361/23495/6846/6373/729230/6363/8807/356/3577/7293/10663/6362/6366/920/9573/50615/3603/2829/1233/6368/4283/1234/3575/6348/939/6352/3458/9560/6349/3604/3559/10563/3560/1436/1237/1236/608/2833/3561/6351/4049/3594/6358/3587/959/1439/10673	47
hsa04062	Chemokine signaling pathway	33/225	190/7847	2.3594e-17	2.20604e-15	1.78818e-15	6361/6846/6373/729230/1794/10235/6363/2268/3577/10663/6362/6366/2829/1233/6368/4283/1234/6348/7454/6352/9560/6349/10563/1237/1236/2833/6351/3702/6358/653361/5579/2793/51764	33
hsa04640	Hematopoietic cell lineage	23/225	97/7847	1.88022e-15	1.17201e-13	9.50007e-14	921/3684/945/916/920/924/913/3575/917/931/3117/3559/952/1436/915/914/910/2209/929/2208/951/3118/925	23
hsa04380	Osteoclast differentiation	25/225	128/7847	1.36062e-14	6.36091e-13	5.15604e-13	10859/6688/10288/55423/2213/3932/2214/7305/3458/11024/1436/11006/10990/2209/3937/353514/695/79168/653361/10326/2212/4689/126014/11025/23547	25
hsa05340	Primary immunodeficiency	15/225	37/7847	2.44913e-14	9.15974e-13	7.42472e-13	23495/916/5788/920/3543/973/29851/3932/3575/7535/915/3561/695/959/925	15
hsa04514	Cell adhesion molecules (CAMs)	26/225	146/7847	3.97621e-14	1.23925e-12	1.00452e-12	940/3684/201633/941/5788/923/6403/920/6693/29851/5133/6402/3117/3683/914/80380/3385/6614/6404/959/7412/3118/1493/942/925/3689	26
hsa05150	Staphylococcus aureus infection	18/225	68/7847	3.11428e-13	8.31957e-12	6.7437e-12	3684/6403/2213/2214/2359/3117/716/3683/2357/2209/712/6404/714/719/3118/2212/713/3689	18
hsa04650	Natural killer cell mediated cytotoxicity	23/225	131/7847	1.754e-12	4.09997e-11	3.32336e-11	259197/4068/3824/356/10870/2207/919/3822/3932/2214/3002/7305/3458/7535/3683/3805/3937/962/5551/3821/51744/5579/3689	23
hsa04660	T cell receptor signaling pathway	18/225	101/7847	3.94082e-10	8.18815e-09	6.63717e-09	940/916/5788/919/920/29851/5133/3932/917/9402/3458/7535/915/3702/3937/959/1493/925	18
hsa04659	Th17 cell differentiation	17/225	107/7847	7.70029e-09	1.43995e-07	1.1672e-07	916/3662/919/920/50615/3932/917/3458/7535/3117/3559/3560/30009/915/3561/3594/3118	17
hsa05332	Graft-versus-host disease	11/225	41/7847	1.25052e-08	2.12589e-07	1.72321e-07	940/941/3824/356/3002/3458/3117/5551/3821/3118/942	11
hsa04658	Th1 and Th2 cell differentiation	15/225	92/7847	4.22165e-08	6.57875e-07	5.33262e-07	916/919/920/3932/917/3458/7535/3117/3559/3560/30009/915/3561/3594/3118	15
hsa05330	Allograft rejection	10/225	38/7847	7.19622e-08	1.03515e-06	8.39074e-07	940/941/356/3002/3458/3117/5551/959/3118/942	10
hsa04064	NF-kappa B signaling pathway	15/225	100/7847	1.33152e-07	1.77853e-06	1.44164e-06	6363/6366/3932/9560/7535/6351/4049/597/929/695/959/7412/23643/5579/10673	15
hsa04940	Type I diabetes mellitus	10/225	43/7847	2.57351e-07	3.2083e-06	2.6006e-06	940/941/356/3002/3458/3117/4049/5551/3118/942	10
hsa04672	Intestinal immune network for IgA production	10/225	49/7847	9.48501e-07	1.10856e-05	8.9858e-06	940/23495/941/29851/3117/608/959/3118/942/10673	10
hsa05140	Leishmaniasis	12/225	74/7847	1.05139e-06	1.15653e-05	9.37463e-06	3684/2214/3458/3117/1536/2209/653361/3118/5579/2212/4689/3689	12
hsa04145	Phagosome	17/225	152/7847	1.44405e-06	1.50021e-05	1.21604e-05	3684/11151/4481/2213/30835/2214/4360/8685/3117/1536/2209/929/653361/3118/2212/4689/3689	17
hsa05323	Rheumatoid arthritis	13/225	91/7847	1.65794e-06	1.63176e-05	1.32267e-05	940/941/6348/6352/3458/6349/3117/3683/3118/1493/942/10673/3689	13
hsa05320	Autoimmune thyroid disease	10/225	53/7847	2.0353e-06	1.903e-05	1.54254e-05	940/941/356/3002/3117/5551/959/3118/1493/942	10
hsa04620	Toll-like receptor signaling pathway	13/225	104/7847	7.60605e-06	6.77301e-05	5.49008e-05	6373/941/51311/51284/4283/6348/6352/9560/6349/6351/929/23643/942	13
hsa05144	Malaria	9/225	49/7847	8.44639e-06	7.17943e-05	5.81952e-05	2532/6403/2995/3820/3458/3683/959/7412/3689	9
hsa05152	Tuberculosis	17/225	179/7847	1.35118e-05	0.000109857	8.90478e-05	3684/11151/2207/2213/4046/30835/2214/4360/3458/3117/26253/2209/3587/929/3118/2212/3689	17
hsa05322	Systemic lupus erythematosus	14/225	133/7847	2.51918e-05	0.000196286	0.000159106	940/941/2214/3458/3117/716/2209/712/959/714/3118/942/2212/713	14
hsa05142	Chagas disease (American trypanosomiasis)	12/225	103/7847	3.51767e-05	0.000263122	0.000213282	916/356/919/6348/917/6352/3458/6349/915/712/714/713	12
hsa05416	Viral myocarditis	9/225	59/7847	4.02632e-05	0.000289585	0.000234733	940/941/3117/3683/5551/959/3118/942/3689	9
hsa04610	Complement and coagulation cascades	10/225	79/7847	7.83364e-05	0.000542552	0.000439783	3684/7448/11326/716/712/3053/714/719/713/3689	10
hsa05133	Pertussis	9/225	76/7847	0.000299178	0.00199808	0.00161961	3684/3394/716/929/712/714/23643/713/3689	9
hsa04612	Antigen processing and presentation	9/225	77/7847	0.000330475	0.00213099	0.00172735	3824/920/3822/3458/3117/3805/3821/3118/925	9
hsa04670	Leukocyte transendothelial migration	11/225	112/7847	0.000346984	0.00216286	0.00175318	3684/4318/399/3683/1536/3702/653361/7412/5579/4689/3689	11
hsa05321	Inflammatory bowel disease (IBD)	8/225	65/7847	0.000497797	0.00300284	0.00243405	8807/50615/3458/3117/30009/3561/3594/3118	8
hsa05162	Measles	12/225	138/7847	0.000579378	0.00338574	0.00274442	940/916/356/2213/51284/30835/917/3559/3560/915/6504/3561	12
hsa04666	Fc gamma R-mediated phagocytosis	9/225	91/7847	0.00113523	0.00643299	0.00521447	1794/5788/2213/2214/7454/2209/653361/5579/2212	9
hsa05143	African trypanosomiasis	5/225	37/7847	0.00382209	0.0210215	0.0170396	356/3250/3458/7412/5579	5
hsa05166	Human T-cell leukemia virus 1 infection	14/225	219/7847	0.00408807	0.021842	0.0177047	6688/916/920/3932/917/3117/3559/3560/3683/915/3561/4049/3118/3689	14
hsa04611	Platelet activation	9/225	124/7847	0.00912513	0.0474	0.0384216	10235/2207/54518/64805/3937/695/2212/83706/5023	9
