# Supplementary material for: Identification of prognostic immune-related genes in the tumor microenvironment of endometrial cancer
Source: Aging (Albany NY). 2020 Feb 19;12(4):3371–87. doi: 10.18632/aging.102817 (PMC7066904; doi:10.18632/aging.102817)
Supplement: Supplementary Table 5 [file aging-12-102817-s003..xlsx]

## Sheet: EC_timer
Supplementary Table 5. The infiltration of six types immune cells of EC patients.
sampleID	B_cell	T_cell.CD4	T_cell.CD8	Neutrophil	Macrophage	DC
TCGA-D1-A17C	0.0602673	0.226602	0.0708576	0.0696447	0.13352	0.441079
TCGA-D1-A1O7	0.0817057	0.089685	0.095404	0.0917144	0.075163	0.348901
TCGA-AX-A3G8	0.0887224	0.0446618	0.0852051	0.0755783	0.00312836	0.276107
TCGA-D1-A17F	0	0.209715	0.165419	0.118857	0.121893	0.513798
TCGA-AX-A3G3	0.0245276	0.110766	0.530141	0.0972964	0.328503	0.906155
TCGA-D1-A1NS	0.0725096	0.114112	0.0702033	0.105523	0.0931673	0.409039
TCGA-D1-A17N	0	0.316207	0.209656	0.0442399	0.242582	0.481207
TCGA-D1-A17A	0.0828552	0.0732944	0.154288	0.090974	0.0572642	0.402781
TCGA-AJ-A3EJ	0.148719	0.145037	0.110236	0.0946399	0.0819843	0.546622
TCGA-D1-A101	0	0.267861	0.436637	0.110294	0.144622	0.535679
TCGA-H5-A2HR	0.100867	0.0798937	0.132773	0.0746492	0.0872548	0.419128
TCGA-D1-A17Q	0.0952948	0.0796717	0.0835903	0.0576163	0.0415105	0.337517
TCGA-BG-A221	0.104959	0.116565	0.302636	0.111971	0.105905	0.611984
TCGA-D1-A15Z	0.0853479	0.112095	0.0745105	0.0724673	0.0461036	0.37311
TCGA-D1-A1O0	0.11083	0.0819223	0.0774385	0.0709385	0.0442484	0.328992
TCGA-DF-A2KN	0.072108	0.191906	0.545113	0.127923	0.22047	0.995105
TCGA-D1-A17T	0.106113	0.125965	0.130018	0.0737956	0.0998137	0.434359
TCGA-E6-A2P8	0.108826	0.172657	0.303811	0.135195	0.13801	0.835665
TCGA-D1-A16F	0.0769981	0.120783	0.117266	0.106897	0.126341	0.39442
TCGA-AJ-A8CT	0.0962967	0.515723	0.40505	0.164929	0.263874	0.776718
TCGA-AX-A2HK	0.118556	0.0554402	0.0833524	0.0738797	0.0222679	0.350985
TCGA-D1-A16X	0.0765205	0.273626	0.246411	0.0666551	0.137205	0.778971
TCGA-D1-A160	0.0631007	0.230261	0.196943	0.110562	0.10034	0.523814
TCGA-D1-A16V	0.11752	0.153584	0.167194	0.0799681	0.0457014	0.51054
TCGA-D1-A1O8	0.208184	0.319464	0.681028	0.0889044	0.312987	1.1609
TCGA-BG-A0W1	0.0597928	0.117414	0.0906147	0.0905139	0.151813	0.334802
TCGA-D1-A3DG	0.111178	0.0695625	0.0657743	0.0666702	0.0566916	0.318117
TCGA-D1-A102	0.0700106	0.0976352	0.195304	0.0997179	0.166671	0.488817
TCGA-QS-A8F1	0.0889695	0.0417323	0.132574	0.0957516	0.0976744	0.269959
TCGA-AX-A2H2	0.129236	0.184417	0.153639	0.093278	0.0754881	0.515287
TCGA-BS-A0TE	0.0688441	0.103917	0.178622	0.0708464	0.0280432	0.392576
TCGA-D1-A0ZS	0.122034	0.055232	0.0789464	0.0684135	0.00925231	0.347654
TCGA-EY-A72D	0.111554	0.0668434	0.0617861	0.0781401	0.0249	0.327298
TCGA-EY-A1G7	0.125037	0.0490651	0.072045	0.0713376	0.0250847	0.342337
TCGA-D1-A175	0.106097	0.0799129	0.125261	0.0608449	0.0225243	0.343641
TCGA-AP-A1DV	0.0735211	0.129082	0.0880008	0.0847783	0.025663	0.347077
TCGA-PG-A917	0.0834679	0.211914	0.330419	0.110971	0.0950999	0.637702
TCGA-D1-A17B	0.0917103	0.197286	0.362664	0.152426	0.44326	1.10188
TCGA-EC-A1QX	0.0194037	0.0609432	0.471239	0.0825072	0.0774856	0.540377
TCGA-FI-A2D4	0.103121	0.0681612	0.0750054	0.0773239	0.0228803	0.319892
TCGA-PG-A915	0.108694	0.0458953	0.0987133	0.0677621	0.0100137	0.322114
TCGA-D1-A2G6	0.103141	0.0840625	0.113921	0.0784885	0.0818151	0.416733
TCGA-FI-A2EX	0.113302	0.0570583	0.107938	0.0973936	0.00435186	0.368072
TCGA-DI-A1NO	0.107145	0.0626702	0.0609884	0.0674052	0.0055062	0.298802
TCGA-KP-A3W1	0	0.0829112	0.704914	0.121229	0.226299	0.850763
TCGA-BG-A222	0.108275	0.0864885	0.137644	0.0760409	0.0587574	0.432776
TCGA-BK-A6W4	0	0.179611	0.153242	0.111591	0.117531	0.351848
TCGA-BK-A6W3	0.115381	0.170259	0.27304	0.101913	0.106485	0.687342
TCGA-EY-A212	0.11932	0.0676558	0.0694441	0.0675938	0.0190081	0.343096
TCGA-D1-A17M	0.0896283	0.107111	0.119781	0.0769673	0.0264091	0.424752
TCGA-AJ-A23O	0.137152	0.286864	0.303237	0.111976	0.113076	0.638983
TCGA-5S-A9Q8	0.0933524	0.0879943	0.0849175	0.0738608	0.0306292	0.33428
TCGA-D1-A16Q	0.0684619	0.222351	0.138323	0.0881589	0.174866	0.428444
TCGA-BG-A0MA	0.0934411	0.081342	0.13058	0.0788349	0.0514859	0.376241
TCGA-DF-A2KY	0.0688065	0.0940001	0.32776	0.0738252	0.0982197	0.807411
TCGA-EO-A1Y5	0.0763617	0.139689	0.340453	0.0776725	0.145197	0.704588
TCGA-EY-A1GW	0.0730153	0.109967	0.0391847	0.081129	0.0166505	0.325601
TCGA-D1-A17R	0.0904099	0.0854058	0.0731464	0.0648713	0.0814034	0.358335
TCGA-A5-A7WJ	0.114711	0.0725154	0.0550248	0.0699516	0	0.297399
TCGA-BG-A3EW	0.00655094	0.0959078	0.179755	0.133898	0.163029	0.306639
TCGA-EY-A4KR	0.0728705	0.0284761	0.572454	0.117501	0.160724	0.806871
TCGA-D1-A16I	0.0664627	0.124065	0.0702382	0.0700579	0.115288	0.454684
TCGA-B5-A1MY	0.121093	0.078393	0.0870192	0.070604	0.0508022	0.410999
TCGA-AX-A06D	0.102864	0.102633	0.0657251	0.0796623	0.0648331	0.388863
TCGA-DI-A2QT	0.100959	0.0619493	0.076638	0.0705942	0.0292026	0.315162
TCGA-BG-A0YV	0.119265	0.0557122	0.0761181	0.0782578	0.050659	0.332181
TCGA-EY-A210	0.114532	0.155722	0.342374	0.076583	0.178952	0.783872
TCGA-AP-A05O	0.0775156	0.11	0.218926	0.0746406	0.107048	0.524756
TCGA-AJ-A5DW	0.12191	0.0625341	0.17275	0.094695	0.0203019	0.44265
TCGA-BK-A56F	0.122547	0.126889	0.138016	0.102353	0.116534	0.502774
TCGA-D1-A1NU	0.108348	0.101783	0.123646	0.077719	0.040133	0.426562
TCGA-KP-A3W0	0.123215	0.140131	0.159855	0.114404	0.14538	0.649433
TCGA-AX-A1C4	0.109098	0.0576879	0.0534733	0.0645964	0	0.287704
TCGA-B5-A0K9	0.0838662	0.143959	0.125277	0.134749	0.033576	0.521726
TCGA-AX-A05S	0.062462	0.130638	0.143072	0.107573	0.150199	0.415842
TCGA-BG-A186	0.12563	0.169434	0.121132	0.0860851	0.0950847	0.514613
TCGA-FI-A2D5	0.126402	0.0987348	0.121373	0.0752927	0.0599227	0.481865
TCGA-BG-A18A	0.0767586	0.122033	0.119049	0.0643184	0.119101	0.414303
TCGA-K6-A3WQ	0.105881	0.0387858	0.115728	0.0849734	0.0328747	0.317475
TCGA-EY-A548	0.0790098	0.0958055	0.163207	0.0991294	0.100407	0.436783
TCGA-BG-A220	0.11396	0.0567491	0.0528644	0.0655394	0.00998058	0.310424
TCGA-EY-A214	0.0956341	0.138743	0.133754	0.142155	0.133551	0.468829
TCGA-AJ-A23N	0.108055	0.0978869	0.183694	0.117266	0.19901	0.559162
TCGA-AX-A3GB	0	0.17029	0.251785	0.0948898	0.108441	0.448724
TCGA-AJ-A3EK	0.153382	0.1887	0.325442	0.146244	0.0772678	0.80435
TCGA-B5-A1MW	0.11312	0.0711767	0.0544566	0.0654794	0	0.326435
TCGA-EY-A54A	0.137948	0.120187	0.249626	0.136773	0.127918	0.66031
TCGA-D1-A179	0.0997616	0.0777628	0.0522268	0.0719547	0.0317409	0.331129
TCGA-BG-A187	0.0987577	0.0915392	0.0963179	0.055632	0.0962149	0.416667
TCGA-AJ-A3OL	0.111969	0.0561959	0.0510931	0.0726243	0.000254764	0.285806
TCGA-BG-A0YU	0.0882543	0.112495	0.0984978	0.0721274	0.0326752	0.350309
TCGA-QS-A744	0.13365	0.0484666	0.0604869	0.0661645	0.00742632	0.293681
TCGA-A5-A3LP	0.112844	0.0681961	0.151366	0.0799803	0.0644373	0.440387
TCGA-EY-A1G8	0.10176	0.0406634	0.0828214	0.0778948	0.0106938	0.303374
TCGA-D1-A1O5	0.130475	0.136449	0.0772905	0.0893063	0.160084	0.439774
TCGA-AJ-A3OJ	0.0710396	0.0859304	0.288504	0.0935764	0.126516	0.559549
TCGA-BG-A0RY	0.133808	0.112172	0.0656175	0.0894339	0.0729508	0.60863
TCGA-BG-A18C	0.0795702	0.0898086	0.15816	0.0810245	0.0528682	0.392784
TCGA-BG-A18B	0.0213879	0.0126924	0.471873	0.0742325	0.0543834	0.613654
TCGA-AJ-A3NG	0.118424	0.0753643	0.0714845	0.0742359	0.0187529	0.333227
TCGA-D1-A167	0.112737	0.0537812	0.0996546	0.0595654	0	0.327186
TCGA-EY-A1GV	0.058036	0.0209146	0.177832	0.142947	0.162984	0.325144
TCGA-D1-A3DA	0.11006	0.0899292	0.0389981	0.109743	0.0143511	0.3444
TCGA-AJ-A3OK	0.00915982	0.262232	0.387665	0.137583	0.244464	0.646596
TCGA-A5-A0VQ	0.0905518	0.142925	0.117222	0.102864	0.0499334	0.400812
TCGA-EC-A1NJ	0.119808	0.25575	0.373357	0.150156	0.112791	0.673061
TCGA-EY-A1GT	0.089696	0.0620115	0.116629	0.0794269	0.0369698	0.322716
TCGA-DI-A0WH	0.0987988	0.0656896	0.113901	0.0760058	0.0157728	0.310793
TCGA-EO-A3KW	0.0932726	0.109232	0.162851	0.108415	0.0650637	0.580116
TCGA-B5-A121	0.0922045	0.113438	0.136917	0.0701525	0.0422579	0.402344
TCGA-BK-A4ZD	0	0.196155	0.187497	0.0989528	0.157487	0.349676
TCGA-B5-A11U	0.0640947	0.0610218	0.231847	0.12027	0.139211	0.363971
TCGA-EC-A24G	0.0726032	0.17093	0.237148	0.087776	0.0843259	0.504969
TCGA-D1-A0ZN	0.0937065	0.12814	0.217758	0.0839187	0.10828	0.448627
TCGA-A5-AB3J	0.000721493	0.225225	0.24314	0.134052	0.155716	0.424623
TCGA-D1-A1NY	0.0954361	0.0644614	0.136018	0.0721651	0.0448218	0.373812
TCGA-AJ-A3QS	0.132827	0.16141	0.353611	0.138507	0.0455717	0.667533
TCGA-AJ-A3TW	0.134259	0.164755	0.247161	0.174025	0.192176	0.995939
TCGA-D1-A3JP	0.0759118	0.280555	0.207468	0.168683	0.308602	0.712169
TCGA-EY-A5W2	0.0484924	0.0972706	0.205824	0.0802232	0.0398472	0.467616
TCGA-AJ-A3I9	0.0956571	0.0718391	0.0691811	0.0755218	0.0290944	0.336889
TCGA-PG-A916	0.101097	0.0846596	0.133448	0.0793997	0.0367723	0.386338
TCGA-D1-A3JQ	0.0854819	0.0891253	0.216738	0.0810523	0.0942445	0.491805
TCGA-B5-A11Z	0.107536	0.0984891	0.0936206	0.0745714	0.0121601	0.33518
TCGA-D1-A16Y	0.0959784	0.0509931	0.105842	0.055229	0.0261837	0.310666
TCGA-A5-A0R7	0.0875014	0.249158	0.229045	0.110909	0.100073	0.477254
TCGA-EY-A1GR	0.137959	0.140776	0.136042	0.0978546	0.297162	0.64009
TCGA-JU-AAVI	0.0219194	0.0172072	0.676251	0.0543428	0.135227	0.650126
TCGA-AX-A2HH	0.113672	0.0441697	0.0628707	0.0624414	0	0.279873
TCGA-A5-A0GA	0.0809845	0.0813844	0.142363	0.0742641	0.047319	0.360831
TCGA-EY-A1GQ	0.0608757	0.12322	0.0844127	0.0887807	0.0697522	0.331047
TCGA-EY-A547	0.0883346	0.0686415	0.0789983	0.0842058	0.0352521	0.297633
TCGA-D1-A1NZ	0.0496156	0.234756	0.150319	0.0920477	0.0755878	0.462862
TCGA-D1-A177	0.100765	0.0817123	0.0424596	0.0739082	0	0.289276
TCGA-AJ-A3BG	0.102788	0.0704547	0.0946559	0.0711168	0.0287304	0.35692
TCGA-AJ-A3BF	0.0959557	0.0825203	0.129083	0.072097	0.0345321	0.362008
TCGA-KP-A3W4	0.0670801	0.0903509	0.219444	0.0966904	0.0990226	0.439399
TCGA-D1-A1NX	0.0887873	0.100712	0.0672672	0.0881366	0.0591705	0.343533
TCGA-SJ-A6ZJ	0.0852185	0.0803837	0.109671	0.0944444	0.0739159	0.355865
TCGA-AX-A3G9	0.0966451	0.0437837	0.087395	0.0664649	0	0.283893
TCGA-A5-A7WK	0.107754	0.0441414	0.113566	0.0762151	0.0209962	0.356515
TCGA-B5-A11Y	0.0736486	0.232821	0.431109	0.114913	0.186646	0.762926
TCGA-BG-A0LW	0.098633	0.100351	0.0947956	0.0821085	0.0566288	0.381453
TCGA-D1-A16S	0.0950767	0.0782101	0.061768	0.0740531	0.0509779	0.296795
TCGA-D1-A3DH	0.113807	0.0548444	0.0480866	0.0664666	0	0.291378
TCGA-EY-A1GP	0.0835306	0.123034	0.219859	0.0907286	0.10695	0.430544
TCGA-EY-A215	0.0463125	0.205801	0.226352	0.0752592	0	0.42038
TCGA-AJ-A3BI	0	0.106633	0.296753	0.0986172	0.0699395	0.433916
TCGA-EY-A1GO	0.0978822	0.0563326	0.0559032	0.0685392	0	0.275423
TCGA-BG-A0M0	0.113646	0.0725679	0.0439231	0.0650514	0.00363818	0.30185
TCGA-EY-A1H0	0.0949173	0.06901	0.0609969	0.0698518	0	0.300007
TCGA-EO-A2CH	0.112014	0.070557	0.0746921	0.071925	0.0214342	0.33874
TCGA-B5-A11W	0.0944553	0.134919	0.0976728	0.0922166	0.0553919	0.393309
TCGA-D1-A174	0.128427	0.534813	0.427226	0.0127638	0.149983	0.745627
TCGA-B5-A11V	0.0913047	0.0933682	0.0934647	0.0941154	0.0325928	0.349938
TCGA-A5-A0R8	0.0190248	0.213695	0.185724	0.135317	0.144337	0.495294
TCGA-B5-A11X	0.252535	0.160311	0.299947	0.13273	0.0528311	0.734819
TCGA-AJ-A2QL	0.0934288	0.12187	0.0771595	0.0787879	0.0396659	0.397564
TCGA-D1-A0ZO	0.0647372	0.231891	0.181414	0.110436	0.0799649	0.508441
TCGA-EY-A549	0.104395	0.122235	0.116387	0.0899789	0.0470273	0.426254
TCGA-BG-A2AD	0	0.184879	0.282731	0.145899	0.352226	0.498797
TCGA-EY-A2ON	0.142827	0.0352267	0.181117	0.137222	0.0303401	0.474731
TCGA-BG-A2L7	0.147228	0.224317	0.311242	0.0997449	0.132973	0.716401
TCGA-BG-A0LX	0.0732232	0.189469	0.207841	0.090395	0.0638795	0.460406
TCGA-AJ-A23M	0.116351	0.106063	0.071678	0.0887427	0.0431743	0.420797
TCGA-BG-A0MU	0.112087	0.147618	0.139868	0.0867113	0.059161	0.483183
TCGA-AX-A3G1	0.227159	0.179524	0.309342	0.129583	0.0474972	0.718864
TCGA-AJ-A3NE	0	0.0301973	0.349403	0.159215	0.139988	0.41219
TCGA-SJ-A6ZI	0.0583303	0.256806	0.408744	0.184508	0.127408	0.745729
TCGA-AJ-A3IA	0.125905	0.166366	0.201574	0.108104	0.140295	0.576219
TCGA-AP-A05P	0.0944477	0.0346378	0.237979	0.10179	0.0541319	0.388582
TCGA-BG-A0M2	0.0783608	0.151845	0.156004	0.0965783	0.0130325	0.424022
TCGA-AJ-A2QK	0.179181	0.356357	0.294792	0.138617	0.142191	0.678861
TCGA-BG-A0MT	0.136356	0.149971	0.131683	0.095108	0.140681	0.581674
TCGA-AJ-A3NF	0.0504993	0.209365	0.326679	0.142931	0.154452	0.68271
TCGA-PG-A6IB	0	0.21264	0.806678	0.0846421	0.280849	0.969365
TCGA-AP-A3K1	0.0866963	0.0546252	0.0716776	0.0955445	0.0311487	0.328444
TCGA-D1-A103	0.121994	0.109018	0.172438	0.0820299	0.0914594	0.486135
TCGA-AP-A052	0.129972	0.08962	0.0935522	0.0828334	0.0519745	0.450222
TCGA-EY-A1GS	0.0988313	0.102267	0.0417007	0.0851912	0.0740752	0.352108
TCGA-BG-A0M6	0.130949	0.0600228	0.0504188	0.0631276	0.00765021	0.29045
TCGA-AJ-A3EM	0.108942	0.0599413	0.0558765	0.0655019	0	0.289091
TCGA-EO-A3KU	0.13022	0.0659772	0.113172	0.0796377	0.0223349	0.385124
TCGA-AJ-A5DV	0.168582	0.125629	0.092703	0.148482	0.137633	0.571896
TCGA-BG-A3PP	0.00635329	0	0.227227	0.131234	0.104421	0.266508
TCGA-AJ-A3EL	0.0686107	0.128357	0.426051	0.109517	0.0982514	0.534233
TCGA-D1-A0ZZ	0.09227	0.0657002	0.0513196	0.0729196	0	0.300506
TCGA-PG-A914	0.126772	0.100246	0.126134	0.0942967	0.0387859	0.516671
TCGA-QF-A5YS	0.058864	0.119304	0.145282	0.0892564	0.0619456	0.416779
TCGA-EY-A1GK	0.0935112	0.151039	0.433897	0.102404	0.0700116	0.587508
TCGA-EY-A2OM	0.149065	0.0667414	0.0665948	0.113846	0.0161505	0.446254
TCGA-D1-A17U	0.0953692	0.110563	0.114769	0.0794573	0.0983961	0.473848
TCGA-AX-A1CR	0.108263	0.0613646	0.140029	0.0973439	0.119989	0.364303
TCGA-A5-A0GW	0.0940517	0.244731	0.542398	0.140587	0.101929	0.818462
TCGA-PG-A5BC	0.0967495	0.0803145	0.110548	0.0794127	0.00746651	0.342369
TCGA-AP-A054	0.0949645	0.0776913	0.107648	0.0669062	0.000369549	0.329753
TCGA-EY-A1GI	0.118245	0.102423	0.17366	0.105052	0.0327207	0.517537
TCGA-EY-A1GH	0.119477	0.0924376	0.108375	0.109033	0.097216	0.43758
TCGA-E6-A1LX	0.106836	0.0988311	0.0914226	0.0773926	0.00715478	0.343631
TCGA-BG-A0MI	0.104732	0.0747258	0.184887	0.0667981	0.119317	0.468616
TCGA-QS-A5YR	0.0544845	0.174254	0.239974	0.168258	0.227125	0.532785
TCGA-BG-A2AE	0.117978	0.152457	0.296482	0.0695993	0.12577	0.620253
TCGA-KP-A3VZ	0.108328	0.0656817	0.057423	0.0720731	0.00974592	0.326919
TCGA-AP-A05N	0.0870007	0.078148	0.086566	0.0857127	0.0384325	0.31103
TCGA-D1-A0ZV	0.0831923	0.317896	0.216581	0.13899	0.301609	0.7915
TCGA-BK-A26L	0.176777	0.0693171	0.177034	0.112561	0.0934694	0.574199
TCGA-D1-A17S	0.100181	0.112532	0.0353362	0.0837168	0.0867604	0.339119
TCGA-BS-A0TA	0	0.126987	2.22287	0	0.36224	1.73253
TCGA-EY-A1GE	0.115893	0.216462	0.199759	0.10974	0.095385	0.642701
TCGA-A5-A0R9	0.0643915	0.117311	0.160689	0.0996509	0.0992229	0.45579
TCGA-A5-A2K5	0.0573861	0.0971592	0.219569	0.0960605	0.0964167	0.465181
TCGA-QS-A5YQ	0.0169169	0.190427	0.280774	0.0994559	0.101676	0.503935
TCGA-BK-A13C	0	0.219471	0.225565	0.111735	0.205274	0.455166
TCGA-AP-A0LV	0.0904423	0.0810845	0.133935	0.0845672	0.0716913	0.410305
TCGA-FI-A2D6	0.0740363	0.154746	0.222563	0.117449	0.0525726	0.743475
TCGA-AX-A2H7	0.113819	0.104388	0.0769935	0.0713519	0.0401686	0.345611
TCGA-A5-A3LO	0.0862614	0.0873391	0.0673912	0.0917555	0.0199143	0.321408
TCGA-AX-A1C8	0.116852	0.0643919	0.065013	0.0785857	0	0.339594
TCGA-AX-A1CC	0.172767	0.363965	0.359625	0.164841	0.194706	0.92791
TCGA-DF-A2L0	0.0586287	0.100436	0.130579	0.0968573	0.100329	0.393304
TCGA-KP-A3W3	0.0590555	0.145108	0.170043	0.128419	0.186993	0.532185
TCGA-D1-A17L	0.130337	0.277213	0.10914	0.101647	0.122426	0.542189
TCGA-AX-A1C9	0.133021	0.168229	0.189459	0.100256	0.115779	0.548831
TCGA-EO-A3B1	0.0981491	0.206502	0.271303	0.132639	0.102652	0.650802
TCGA-B5-A0KB	0.203238	0.16227	0.128679	0.216501	0.134728	0.651065
TCGA-B5-A11P	0.112092	0.0658709	0.0560591	0.075647	0.00888063	0.30548
TCGA-AP-A0LM	0.153666	0.304487	0.574816	0.134179	0.184632	0.600522
TCGA-EO-A3AZ	0	0	1.32103	0.0548913	0.225543	1.14293
TCGA-EY-A1GF	0.116475	0.124969	0.18462	0.0914969	0.011142	0.495568
TCGA-DF-A2KZ	0.0601719	0.109351	0.149753	0.11425	0.0699899	0.42592
TCGA-B5-A0K3	0.113971	0.0944765	0.0777639	0.0672071	0.0527946	0.433541
TCGA-EY-A3L3	0.109947	0.0446688	0.103143	0.0636947	0	0.303498
TCGA-AX-A06H	0.241848	0.537772	0.863749	0.151342	0.0982315	1.02785
TCGA-D1-A16G	0.0243991	0.115465	0.0552683	0.105022	0.0693205	0.388502
TCGA-B5-A3FH	0.105276	0.100813	0.112757	0.113812	0.0270082	0.422882
TCGA-AP-A1E3	0.0577701	0.103694	0.140268	0.0915826	0.0582955	0.328013
TCGA-B5-A0K8	0.129069	0.107976	0.217121	0.0749626	0.0654493	0.422483
TCGA-AX-A2HF	0.103736	0.0751813	0.155614	0.0618475	0.0555586	0.409274
TCGA-D1-A17H	0.0469821	0.148835	0.152189	0.083332	0.0694942	0.434178
TCGA-D1-A17K	0.10844	0.0902125	0.0677715	0.0727228	0.0239745	0.342382
TCGA-A5-A0GU	0.12467	0.0946945	0.167783	0.085325	0.0710868	0.476842
TCGA-A5-A2K4	0.119828	0.100762	0.152584	0.102525	0.037355	0.404272
TCGA-D1-A0ZU	0.0922419	0.0950834	0.0976837	0.0700617	0.0380881	0.332516
TCGA-A5-A0VO	0.0769784	0.119942	0.146879	0.104146	0.0866998	0.406283
TCGA-FI-A2EY	0.109353	0.049541	0.0559939	0.0715221	0.000992142	0.289909
TCGA-A5-A0RA	0.095629	0.135772	0.0970928	0.0979087	0.0369622	0.442381
TCGA-EY-A2OQ	0.11198	0.0117346	0.215278	0.0668225	0.0346784	0.418921
TCGA-D1-A161	0.071222	0.138258	0.159677	0.0832974	0.0670984	0.417036
TCGA-AJ-A2QM	0.119661	0.0456894	0.0754147	0.0830965	0	0.317091
TCGA-EO-A1Y8	0.0936652	0.0450057	0.0950753	0.0705748	0.0224554	0.29597
TCGA-B5-A3S1	0.114747	0.104803	0.127999	0.0914344	0.0443112	0.458917
TCGA-AX-A05U	0.123923	0.0461498	0.0855697	0.0772389	0.0253368	0.371059
TCGA-D1-A15X	0.0014834	0.0573524	0.61637	0.0583598	0.0363336	0.547088
TCGA-D1-A16J	0.16735	0.296473	0.126978	0.0622016	0.0531801	0.76021
TCGA-D1-A0ZP	0.107225	0.0831623	0.0792214	0.0731718	0.0256022	0.367138
TCGA-AX-A06J	0.109463	0.102755	0.138342	0.058348	0.0275616	0.454982
TCGA-D1-A15W	0.11868	0.114453	0.161777	0.107962	0.11709	0.541617
TCGA-AX-A2H4	0.00145589	0.147906	0.716565	0.176594	0.203304	1.03008
TCGA-A5-A1OK	0.0950891	0.110653	0.093466	0.0843428	0.108527	0.434128
TCGA-D1-A176	0.109022	0.120392	0.0959344	0.0692044	0.0580096	0.409226
TCGA-D1-A17D	0.0600271	0.177934	0.0850087	0.099253	0.128376	0.559858
TCGA-FI-A2F8	0.0729696	0.104288	0.118068	0.0863709	0.0555598	0.352765
TCGA-BS-A0U7	0.10368	0.158813	0.223604	0.0875441	0.127618	0.513633
TCGA-AX-A2HJ	0.0879685	0.113938	0.144186	0.0849977	0.0978874	0.430568
TCGA-BK-A139	0.116802	0.144747	0.262972	0.118425	0.190083	0.701265
TCGA-EY-A2OP	0.108236	0.055396	0.0884127	0.0645167	0.00353681	0.333445
TCGA-D1-A16N	0.110307	0.112449	0.0836392	0.051369	0.140262	0.481728
TCGA-DI-A2QU	0	0.151336	0.105042	0.111031	0.0923561	0.252422
TCGA-AX-A2IN	0.0402086	0.123254	0.23025	0.127626	0.20147	0.443071
TCGA-AP-A1DO	0.0639748	0.0255942	0.208215	0.0752147	0.0100449	0.310853
TCGA-B5-A1N2	0.112901	0.133775	0.097539	0.0904434	0.0699438	0.392855
TCGA-BK-A13B	0.112823	0.08307	0.126434	0.0936291	0.0551743	0.461099
TCGA-A5-A1OG	0.0876236	0.170752	0.155954	0.083323	0.0886352	0.451329
TCGA-A5-A1OF	0.0245479	0.292049	0.450951	0.11495	0.170619	0.8624
TCGA-AX-A1CA	0.0881405	0.144488	0.117863	0.0785894	0.0254617	0.385114
TCGA-B5-A11Q	0.101962	0.0829244	0.0370359	0.0696641	0.000748998	0.304503
TCGA-EY-A3QX	0.133128	0.101121	0.119074	0.113604	0.101731	0.440407
TCGA-D1-A163	0.114671	0.118488	0.219987	0.0789203	0.0371945	0.523594
TCGA-EY-A1GM	0.114741	0.0549675	0.0764056	0.0673753	0.00997649	0.315361
TCGA-EY-A1GU	0.108501	0.0992444	0.0946888	0.0899342	0.0812601	0.415733
TCGA-A5-A0GB	0.089558	0.066345	0.162177	0.0529687	0	0.377271
TCGA-AX-A1C5	0.106348	0.0437565	0.0948417	0.0582298	0.00265102	0.31695
TCGA-A5-A1OJ	0	0.0613506	0.444887	0.140144	0.250267	0.330185
TCGA-AX-A05T	0.114663	0.080596	0.108887	0.0826252	0.038932	0.461389
TCGA-E6-A8L9	0	0	0.596737	0.0671582	0.161471	0.517951
TCGA-EY-A1GL	0.0865847	0.0456936	0.0922545	0.076582	0.0105292	0.30952
TCGA-AP-A0LO	0.0965405	0.0813386	0.111169	0.0890956	0.0225136	0.341621
TCGA-D1-A16O	0.0937184	0.0806521	0.0858005	0.0820188	0.0333368	0.324224
TCGA-AJ-A3BK	0	0.20963	0.312673	0.0937381	0.170382	0.580304
TCGA-AX-A1CE	0.0985751	0.107319	0.100549	0.0744577	0.0121197	0.389364
TCGA-B5-A5OD	0.0717781	0.144855	0.199552	0.128687	0.182348	0.648866
TCGA-AJ-A3BD	0.066144	0.134164	0.202602	0.0921786	0.0827419	0.490158
TCGA-BG-A0VX	0.0724991	0.171282	0.297816	0.0992507	0.139939	0.547074
TCGA-AX-A2HC	0	0.203249	0.310239	0.118239	0.181642	0.339823
TCGA-AJ-A2QO	0.113808	0.0642303	0.133624	0.0813615	0.019424	0.384003
TCGA-EO-A3AS	0.134188	0.104922	0.0880417	0.0926604	0.0550476	0.450422
TCGA-AX-A1C7	0.103248	0.0557961	0.0499294	0.0740246	0.00722172	0.294979
TCGA-B5-A5OE	0.106532	0.0626142	0.0711381	0.0815594	0.0281377	0.33103
TCGA-A5-A2K7	0.104063	0.0735703	0.102231	0.0843046	0.0839104	0.40164
TCGA-BK-A0CA	0.240347	0.111016	0.200705	0.182581	0.190414	0.56778
TCGA-BK-A0CC	0.294865	0.115521	0.108007	0.31294	0.081606	0.686638
TCGA-AJ-A8CV	0.0439368	0.156229	0.261862	0.103884	0.153379	0.547001
TCGA-AJ-A2QN	0.0965517	0.0758607	0.0975069	0.0753289	0.0443322	0.365612
TCGA-EO-A3AV	0	0.0666686	0.606502	0.1619	0.146999	0.636757
TCGA-BG-A0M3	0.0875273	0.0969602	0.0643837	0.0859618	0.0449729	0.3313
TCGA-AX-A060	0.108249	0.0614098	0.0531002	0.0649521	0	0.298851
TCGA-DI-A1NN	0.157854	0.218885	0.202631	0.0969742	0.222563	0.825602
TCGA-AP-A1DP	0.0964344	0.109922	0.0684681	0.0945238	0.0295358	0.402306
TCGA-AX-A0IU	0.110057	0.074611	0.0777531	0.0712648	0.00556298	0.309873
TCGA-BK-A0CB	0.015073	0.114091	0.157774	0.120831	0.157476	0.341849
TCGA-BK-A0C9	0.0508717	0.188645	0.164309	0.0683566	0.0692625	0.484461
TCGA-KJ-A3U4	0.10727	0.154818	0.234938	0.112605	0.111345	0.56369
TCGA-D1-A168	0.102516	0.0680801	0.0519468	0.057632	0.0409756	0.31139
TCGA-AP-A5FX	0.117091	0.17599	0.133804	0.107029	0.0883236	0.463948
TCGA-A5-A1OH	0.108769	0.0876011	0.035491	0.0750044	0.0379377	0.296478
TCGA-D1-A16B	0.0989615	0.0979368	0.233764	0.0881367	0.0819153	0.482621
TCGA-AP-A0LH	0.0626624	0.106673	0.0671183	0.0847176	0.0216573	0.332391
TCGA-AX-A1CP	0.103804	0.0484379	0.177681	0.108025	0.0793843	0.438125
TCGA-B5-A0K1	0.103608	0.0816567	0.0527084	0.0757685	0.0249046	0.328961
TCGA-DI-A1BY	0.0568698	0.238618	0.184212	0.115783	0.0935419	0.432002
TCGA-D1-A16E	0.116508	0.165807	0.123582	0.0922351	0.125477	0.560506
TCGA-A5-A0GR	0.202371	0.418851	0.395545	0.12299	0.112016	0.897666
TCGA-AP-A05J	0.113579	0.0582515	0.0488385	0.0606434	0.00435866	0.290099
TCGA-AJ-A3NC	0	0.185856	0.367032	0.177699	0.339695	0.250159
TCGA-A5-A0G5	0.071514	0.346098	0.888961	0.0920548	0.134984	1.6061
TCGA-EY-A1GX	0.112054	0.0668685	0.0364354	0.0632099	0	0.2768
TCGA-D1-A169	0.0827839	0.193398	0.139648	0.0578316	0.193987	0.622636
TCGA-D1-A16D	0.0730936	0.116452	0.129105	0.103656	0.116047	0.47716
TCGA-AX-A1CN	0.108786	0.066531	0.0688882	0.0738955	0.00928254	0.318917
TCGA-D1-A162	0.150217	0.115253	0.0778359	0.0841336	0.0823526	0.466379
TCGA-AX-A0IW	0.0953889	0.0972055	0.0766847	0.0700991	0.0349567	0.34247
TCGA-A5-A0R6	0.108342	0.096723	0.153386	0.0616663	0.079597	0.340851
TCGA-EO-A3AY	0	0	0.487441	0.0421895	0.0784897	0.485032
TCGA-AX-A2HG	0.031954	0.119786	0.300581	0.0835836	0.0586813	0.458826
TCGA-EO-A3KX	0.0750842	0.0729738	0.139674	0.0809465	0.0140549	0.344299
TCGA-PG-A7D5	0.0924097	0.0594312	0.12871	0.0687568	0.0191347	0.328669
TCGA-DI-A1BU	0.053444	0.140122	0.239617	0.0852147	0.0394319	0.48083
TCGA-B5-A3FD	0.0868325	0.0792531	0.114974	0.0890755	0.0721526	0.373728
TCGA-D1-A15V	0.103427	0.0611379	0.19162	0.0651764	0.0261459	0.421429
TCGA-5B-A90C	0.103827	0.062575	0.0927935	0.0762758	0.0186025	0.336016
TCGA-FI-A2D0	0.0860696	0	0.26286	0.0674728	0.0197655	0.360008
TCGA-QF-A5YT	0.0863598	0.0517448	0.102017	0.0775	0.0229789	0.296349
TCGA-AX-A0J0	0	0.164198	0.380752	0.14495	0.158533	0.362331
TCGA-FI-A3PV	0.106868	0.0576583	0.0742651	0.0689804	0	0.30088
TCGA-2E-A9G8	0.0961081	0.0778703	0.175914	0.0929539	0.0379263	0.399973
TCGA-B5-A5OC	0.079417	0.226608	0.629716	0.140021	0.151001	0.980976
TCGA-BG-A0MC	0.0710244	0.237759	0.178807	0.0865893	0.0980605	0.56025
TCGA-A5-A0VP	0.108635	0.122186	0.12761	0.0804481	0.0500878	0.400642
TCGA-BG-A0MO	0.0804047	0.141236	0.160107	0.0690981	0.0253599	0.465233
TCGA-BG-A0MK	0.102196	0.189761	0.0564983	0.0854888	0.0515517	0.43059
TCGA-AX-A0IZ	0	0.121689	0.510306	0.177832	0.276289	0.293767
TCGA-AX-A3FX	0.0668699	0.180073	0.102265	0.115173	0.0635083	0.399556
TCGA-B5-A11M	0.0522297	0.136554	0.190322	0.0913835	0.104372	0.399705
TCGA-AP-A05H	0.110823	0.0599058	0.0404507	0.0627118	0	0.273754
TCGA-E6-A2P9	0.095726	0.163194	0.229549	0.0882119	0.0219562	0.491502
TCGA-EY-A2OO	0.136807	0.0785354	0.0849484	0.0724582	0.0481373	0.331945
TCGA-AP-A1E1	0.0885794	0.0988891	0.204647	0.0827859	0.0397028	0.434702
TCGA-AX-A062	0.0827644	0.044594	0.106831	0.0976911	0.0318206	0.289352
TCGA-EO-A22U	0.118838	0.0760205	0.152121	0.0718692	0.00332371	0.396926
TCGA-EO-A3B0	0.134954	0.159302	0.173619	0.0979859	0.0974153	0.598604
TCGA-AX-A2HD	0	0.1732	0.200547	0.103028	0.174124	0.45251
TCGA-A5-A0GP	0.087567	0.0857896	0.105719	0.0803388	0.0249363	0.340838
TCGA-AP-A0LJ	0.0934373	0.13243	0.147362	0.0777325	0.137768	0.490794
TCGA-AP-A1DQ	0.0863231	0.10651	0.159791	0.0898971	0.0555949	0.38415
TCGA-BS-A0T9	0.03045	0.118847	0.142479	0.0795749	0.0822452	0.367912
TCGA-A5-A0G3	0.142023	0.0997478	0.0227157	0.0597181	0.0363761	0.336651
TCGA-D1-A2G5	0.117684	0.0912236	0.0523729	0.0659086	0.0124485	0.348557
TCGA-AP-A059	0	0.219087	1.24785	0.0763144	0.199344	1.30612
TCGA-B5-A1MX	0.0837244	0.163143	0.187559	0.101362	0.0642505	0.508364
TCGA-BG-A0MG	0.0848305	0.0800085	0.0867064	0.10174	0.0496225	0.455223
TCGA-B5-A0K0	0.0605492	0.263249	0.424308	0.095156	0.105645	0.658394
TCGA-D1-A2G0	0.0571196	0.0384289	0.41912	0.0565535	0.0476953	0.483933
TCGA-AP-A0L8	0.125125	0.0610907	0.0556695	0.0666116	0.000268097	0.320965
TCGA-AP-A1DR	0.0986451	0.0684247	0.121181	0.0772735	0.000532978	0.376117
TCGA-EO-A1Y7	0.0821473	0.0482094	0.176807	0.0663664	0.0263104	0.371317
TCGA-AP-A0LT	0.0777652	0.109924	0.10175	0.0696785	0.00639732	0.351539
TCGA-AX-A064	0.0809569	0.0923137	0.0555324	0.111768	0.0824215	0.337323
TCGA-EO-A3AU	0.116614	0.0989509	0.255751	0.107553	0.0428575	0.472643
TCGA-B5-A1MU	0.0974501	0.164468	0.2072	0.190155	0.0296031	0.94763
TCGA-BG-A0VV	0.101119	0.156015	0.112817	0.0893691	0.0639706	0.443616
TCGA-EO-A3L0	0.0771836	0.0888002	0.0857975	0.0862708	0.0247257	0.320803
TCGA-AP-A1E4	0.114559	0.0727664	0.0347221	0.0634583	0	0.281197
TCGA-EO-A2CG	0.0697718	0.0451588	0.158873	0.0999531	0.0452846	0.314534
TCGA-B5-A1MV	0.0880206	0.123968	0.0882591	0.129146	0.127644	0.445631
TCGA-EO-A22Y	0.0965539	0.0795989	0.0749299	0.0784571	0.0498447	0.35518
TCGA-BG-A0VT	0.0718746	0.0812146	0.199312	0.0986834	0.0326878	0.410581
TCGA-BG-A0VW	0.0704798	0.150194	0.149109	0.112842	0.112241	0.442204
TCGA-B5-A1MZ	0.106914	0.0940097	0.199268	0.128764	0.0498409	0.56633
TCGA-BG-A0VZ	0.103632	0.210867	0.214388	0.0993581	0.0701813	0.546325
TCGA-EY-A1GD	0.11433	0.0713644	0.0996426	0.074608	0.0148486	0.363966
TCGA-A5-A0GV	0.0893576	0.0734637	0.0491039	0.0777513	0.00903159	0.283847
TCGA-EY-A1GC	0.157014	0.217552	0.290174	0.104208	0.253395	0.847446
TCGA-B5-A11J	0.129584	0.103855	0.133925	0.0774454	0.0410884	0.433721
TCGA-B5-A0JT	0.123106	0.0850592	0.151827	0.0787359	0.0929173	0.48
TCGA-AP-A1DM	0.0450091	0.0817151	0.191333	0.0877613	0.0065733	0.344106
TCGA-BG-A0W2	0.0908974	0.107745	0.15725	0.0960277	0.0937416	0.429527
TCGA-B5-A0JR	0.0734817	0.154729	0.304039	0.0864307	0.0852867	0.538726
TCGA-AX-A06F	0.106916	0.152935	0.377568	0.122576	0.128089	0.849881
TCGA-EO-A22X	0.325847	0.0494097	0.308777	0.0949496	0.0655154	0.72573
TCGA-B5-A0K4	0.108219	0.080294	0.0528281	0.0627723	0.0045484	0.333842
TCGA-AP-A05D	0.0824856	0.183054	0.118218	0.0827985	0.0823699	0.737617
TCGA-B5-A0JX	0.10205	0.183813	0.197421	0.104009	0.109863	0.630369
TCGA-E6-A1M0	0.0661782	0	0.174706	0.107023	0.0796214	0.287341
TCGA-D1-A2G7	0.0905449	0.0699473	0.0776322	0.0691579	0.0216701	0.317415
TCGA-FI-A2EW	0.099851	0.0705098	0.0873343	0.0918592	0.0414525	0.301686
TCGA-B5-A0JU	0.115117	0.0648248	0.0510239	0.068874	0	0.296292
TCGA-FI-A2F9	0.174429	0.0589451	0.0561608	0.06419	0.0210928	0.332353
TCGA-BS-A0V4	0.00806359	0.0824156	0.0639879	0.149731	0.0722345	0.276088
TCGA-BG-A0MQ	0.109608	0.0748506	0.0714178	0.080096	0.0389738	0.359016
TCGA-B5-A11E	0.122855	0.102861	0.143928	0.0772646	0.0115727	0.417752
TCGA-AP-A1E0	0.0866268	0.0798922	0.151656	0.0789327	0.0262919	0.362283
TCGA-A5-A0GN	0.093153	0.23077	0.246965	0.104885	0.051299	0.713892
TCGA-A5-A0GM	0.0839693	0.093349	0.078701	0.0898046	0.0318577	0.329441
TCGA-AX-A06L	0	0.205445	0.190302	0.189234	0.169845	0.553755
TCGA-AX-A0IS	0.10203	0.0642466	0.11484	0.0809314	0.0090743	0.355818
TCGA-AX-A2H8	0	0.157453	0.209536	0.107996	0.195463	0.337652
TCGA-DF-A2KR	0.0948987	0.105585	0.104877	0.104556	0.0842237	0.425797
TCGA-EO-A22S	0.109579	0.0604517	0.0734114	0.0707471	0	0.327161
TCGA-AP-A0LP	0.0608985	0.18824	0.133757	0.109442	0.156209	0.493524
TCGA-B5-A11N	0.186675	0.329443	0.433287	0.14324	0.20518	0.79701
TCGA-EO-A22R	0.121306	0.115507	0.14542	0.0786386	0.0890037	0.480579
TCGA-BS-A0TI	0.0308913	0.213968	0.204383	0.10422	0.161972	0.485225
TCGA-BG-A0MS	0.0892777	0.11163	0.127074	0.0869136	0.0543757	0.393924
TCGA-BG-A0MH	0.153095	0.221313	0.282151	0.122888	0.198165	0.669409
TCGA-B5-A0K7	0.0510416	0.228761	0.30326	0.0905282	0.123137	0.690507
TCGA-BS-A0V7	0	0.258985	0.368113	0.223331	0.326546	0.496237
TCGA-BG-A0M7	0.124344	0.17887	0.102659	0.0769168	0.107296	0.483937
TCGA-B5-A0JN	0.111897	0.0484592	0.0836915	0.0671681	0.00347619	0.313363
TCGA-AP-A05A	0.107591	0.0517186	0.0524632	0.0656404	0	0.284574
TCGA-B5-A0K6	0.0798988	0.133212	0.178238	0.0807806	0.120707	0.498939
TCGA-AX-A2IO	0.0784108	0.0868473	0.122778	0.0842282	0.0548579	0.35838
TCGA-A5-A0GJ	0.000777166	0.227915	0.177968	0.0862458	0.0903461	0.45429
TCGA-A5-A2K3	0	0	4.48088	0	0.756789	2.85519
TCGA-AP-A0LG	0.118223	0.0661585	0.0664773	0.0715299	0	0.327744
TCGA-BG-A0M8	0.106241	0.354082	0.417408	0.160683	0.252333	0.771051
TCGA-BS-A0WQ	0.0972781	0.0723231	0.0796364	0.0773014	0.0312542	0.32686
TCGA-FI-A2CX	0.353218	0.564094	1.78163	0.870016	0	5.46445
TCGA-EO-A22T	0.11433	0.133566	0.308497	0.0970265	0.0596671	0.62531
TCGA-AX-A06B	0.107744	0.151979	0.205334	0.0994847	0.0783302	0.466888
TCGA-BS-A0TJ	0.0901552	0.0936476	0.201153	0.0787226	0.0225817	0.42486
TCGA-FI-A2CY	0.0785245	0.113192	0.358255	0.141325	0.174147	1.01278
TCGA-A5-A0GX	0.0398254	0.210724	0.109105	0.0564479	0.147352	0.390486
TCGA-B5-A0JY	0.0756956	0.133265	0.178163	0.0859368	0.080937	0.480121
TCGA-AX-A2H5	0.0733047	0.0599399	0.155201	0.0814851	0.0163922	0.337652
TCGA-BG-A0M4	0.136193	0.132613	0.0843297	0.0717145	0.24447	0.520945
TCGA-B5-A0JZ	0	0.388294	0.563932	0.153406	0.110943	0.989408
TCGA-AX-A05Z	0.00665457	0.222899	0.613273	0.0157926	0.132846	0.786821
TCGA-AP-A1DH	0.0247426	0.213512	0.465379	0.0840248	0.0551943	0.639757
TCGA-B5-A3FC	0.076992	0.0641117	0.596811	0.130114	0.231319	0.740933
TCGA-B5-A0K2	0.085865	0.266302	0.475076	0.133498	0.158688	0.749881
TCGA-BS-A0UT	0.0848503	0.0551544	0.102144	0.0813539	0.0401677	0.306972
TCGA-BS-A0UV	0.0750426	0.109782	0.189916	0.0837976	0.0745519	0.417227
TCGA-B5-A11S	0.12947	0.0701548	0.129699	0.0912563	0.0652884	0.440632
TCGA-FI-A2F4	0.115126	0.160522	0.286241	0.0802439	0.0976033	0.6396
TCGA-AX-A1CJ	0.0976489	0.206883	0.128332	0.103623	0.161707	0.44947
TCGA-B5-A11L	0.136476	0.162432	0.169342	0.140177	0.0905452	0.639027
TCGA-A5-A0GQ	0.0598725	0.223339	0.0899959	0.218828	0.212135	0.600429
TCGA-A5-A0GH	0.103193	0.0738706	0.1053	0.0637923	0.0165606	0.315196
TCGA-BG-A0M9	0.0849732	0.093632	0.0494506	0.0841509	0.0248885	0.339518
TCGA-B5-A11I	0.184215	0.214341	0.263043	0.144898	0.138308	0.968034
TCGA-AX-A1CF	0.0797018	0.164887	0.0910019	0.0971333	0.0522958	0.479919
TCGA-B5-A11R	0.0811927	0.0985783	0.160306	0.080941	0.0200855	0.382831
TCGA-FI-A2D2	0.125527	0.082572	0.0965101	0.083918	0.0877629	0.424201
TCGA-AX-A0J1	0.0550418	0.137872	0.236284	0.0771817	0.0576293	0.47206
TCGA-BS-A0TG	0.060981	0.0972975	0.18899	0.0968169	0.0711163	0.450718
TCGA-BS-A0TD	0.0650357	0.0906395	0.0800667	0.0880545	0.0672919	0.326051
TCGA-FI-A3PX	0.100858	0.0636867	0.0802401	0.0742531	0.014694	0.318503
TCGA-E6-A1LZ	0.0941912	0.0890883	0.152376	0.0910698	0.0526666	0.396295
TCGA-AX-A063	0.0375094	0.32356	0.513827	0.121377	0.168865	0.770603
TCGA-AX-A1CK	0.030593	0.176104	0.34356	0.0831441	0.144814	0.54665
TCGA-AX-A05W	0.115265	0.114729	0.109306	0.117482	0.119892	0.49258
TCGA-AX-A2HA	0.0165201	0.211208	0.389465	0.112806	0.161321	0.613797
TCGA-BS-A0UL	0.0481995	0.343768	0.340909	0.143947	0.118806	0.645948
TCGA-BS-A0UJ	0.0754172	0.1798	0.101005	0.0859179	0.110449	0.422933
TCGA-AP-A0LN	0.134747	0.125824	0.102591	0.0715621	0.0483211	0.448478
TCGA-A5-A0G9	0.131497	0.10063	0.100882	0.0800182	0.0844713	0.46002
TCGA-BS-A0V8	0.0649815	0.132974	0.124295	0.127437	0.134865	0.394437
TCGA-AP-A0LL	0.0703859	0.112736	0.102397	0.0870306	0.0357072	0.327308
TCGA-AX-A1CI	0.0763191	0.148941	0.110321	0.0927272	0.0255739	0.430437
TCGA-BS-A0TC	0.089642	0.095963	0.0799628	0.0761053	0.0339692	0.343961
TCGA-B5-A11O	0.049029	0.169212	0.190061	0.150337	0.128609	0.509212
TCGA-BS-A0UF	0.213794	0.26758	0.374869	0.0899348	0.112527	0.948225
TCGA-B5-A0JV	0.0958132	0.0932071	0.06684	0.0689232	0.0152073	0.333365
TCGA-AP-A056	0.0762724	0.0873686	0.267401	0.0811072	0.0882634	0.561508
TCGA-B5-A0JS	0	0	0.745001	0.0243813	0.139877	0.629421
TCGA-BS-A0UM	0.237981	0.391593	0.285504	0.115569	0.172084	0.737198
TCGA-BS-A0VI	0.0852889	0.0506065	0.124733	0.0951147	0.022085	0.351098
TCGA-A5-A0GI	0.084652	0.157401	0.126856	0.0707224	0.0546214	0.395278
TCGA-AX-A05Y	0	0.280472	0.421662	0.12066	0.255399	0.402069
TCGA-B5-A11H	0.205233	0.157024	0.317252	0.11162	0.0784199	0.732548
TCGA-DF-A2KV	0.0325372	0.147314	0.0889866	0.181494	0.217016	0.451113
TCGA-BS-A0V6	0.106161	0.146657	0.182769	0.119977	0.089238	0.538397
TCGA-AP-A1DK	0.163725	0.381838	0.329256	0.154119	0.11481	0.59728
TCGA-BS-A0U9	0.0938964	0.0687478	0.0761524	0.0637574	0.00639183	0.328783
TCGA-B5-A3FB	0.0956179	0.0896193	0.117693	0.0879029	0.0479673	0.405389
TCGA-AP-A0LF	0.0761677	0.121632	1.01793	0.172857	0.0862668	1.03278
TCGA-AP-A0LS	0.0792104	0.0520263	0.201698	0.0758165	0.0045328	0.394651
TCGA-B5-A3FA	0.0992716	0.0905426	0.115924	0.0784071	0.0488163	0.397736
TCGA-BS-A0U5	0.0881262	0.0843261	0.106288	0.077253	0.0220358	0.346944
TCGA-FI-A2EU	0.111299	0.057325	0.0875411	0.0595695	0	0.305396
TCGA-BS-A0U8	0.0836179	0.103571	0.114595	0.0864459	0.0200841	0.368558
TCGA-AP-A0LI	0.01435	0.185411	0.734744	0.0333004	0.168409	0.761967
TCGA-DF-A2KU	0	0.317343	0.571873	0.121737	0.225326	1.01402
TCGA-B5-A1MS	0.0907199	0.0256718	0.153917	0.0739185	0.032308	0.318101
TCGA-A5-A0GE	0.0646041	0.0998513	0.215993	0.09811	0.0628722	0.369178
TCGA-A5-A0G1	0	0.209127	2.28198	0	0.284407	1.51564
TCGA-DF-A2KS	0.104044	0.0905146	0.312957	0.083245	0.0246405	0.566056
TCGA-DI-A2QY	0.0690806	0.149391	0.178142	0.0965006	0.0398354	0.458548
TCGA-AP-A0LE	0.0666263	0.100146	0.102223	0.085738	0.0657969	0.325241
TCGA-A5-A0GD	0.132246	0.139427	0.105475	0.10704	0.147941	0.540403
TCGA-B5-A11G	0.075647	0.155027	0.162322	0.0871156	0.0612573	0.377707
TCGA-BS-A0UA	0.103983	0.317684	0.264592	0.1031	0.150207	0.621491
TCGA-AP-A0LD	0.0805943	0.0830777	0.0727055	0.0708083	0.0111623	0.294516
TCGA-A5-A2K2	0.124117	0.0252632	0.112384	0.0949112	0	0.305513
TCGA-A5-A0GG	0.102988	0.216332	0.161042	0.104239	0.123427	0.502411
TCGA-AP-A0L9	0.119258	0.0683083	0.0667661	0.0698798	0.00239274	0.375687
TCGA-AP-A051	0.15414	0.155032	0.147531	0.0973313	0.0945683	0.49801
TCGA-B5-A3F9	0.10065	0.0744789	0.19882	0.110542	0.0811347	0.443936
TCGA-A5-A0G2	0.125947	0.0749903	0.261424	0.0781732	0.041317	0.578501
TCGA-B5-A11F	0.0983398	0.0768554	0.0852101	0.0778702	0.0334145	0.360486
TCGA-B5-A1MR	0.234329	0.433102	1.06467	0.134707	0.205137	1.87729
